# Supplementary material for: Blood transcriptome analysis revealing aging gene expression profiles in red panda
Source: PeerJ. 2022 Jul 22;10:e13743. doi: 10.7717/peerj.13743 (PMC9310792; doi:10.7717/peerj.13743)
Supplement: Supplemental Information 4 [file peerj-10-13743-s004.xlsx]

## Sheet: Sheet3
The GO and KEGG enrichment analysis result of up-regulated DEGs between geriatric and adult red panda.
source	term_name	term_id	p_value	adujusted_ p-value	HitsGenesCountsInSelectedSet	HitsGenesCountsInBackground	gene_id
GO:BP	immune system process	GO:0002376	0	0	287	2717	Ailurus_023330,Ailurus_000685,Ailurus_000684,Ailurus_010029,Ailurus_016805,Ailurus_022251,Ailurus_013776,Ailurus_019084,Ailurus_002610,Ailurus_022249,Ailurus_012894,Ailurus_012652,Ailurus_010473,Ailurus_012892,Ailurus_021127,Ailurus_020276,Ailurus_022215,Ailurus_009276,Ailurus_009275,Ailurus_013994,Ailurus_020051,Ailurus_023318,Ailurus_023311,Ailurus_014819,Ailurus_012630,Ailurus_006195,Ailurus_0…
GO:BP	immune response	GO:0006955	2.22e-16	8.35e-13	215	1796	Ailurus_023330,Ailurus_000685,Ailurus_000684,Ailurus_010029,Ailurus_016805,Ailurus_022251,Ailurus_013776,Ailurus_002610,Ailurus_022249,Ailurus_012894,Ailurus_012652,Ailurus_021127,Ailurus_020276,Ailurus_022215,Ailurus_009276,Ailurus_020051,Ailurus_023318,Ailurus_023311,Ailurus_014819,Ailurus_012630,Ailurus_020014,Ailurus_000409,Ailurus_000643,Ailurus_006185,Ailurus_010462,Ailurus_025957,Ailurus_0…
GO:BP	defense response	GO:0006952	5.55e-16	1.39e-12	174	1404	Ailurus_023330,Ailurus_000685,Ailurus_000684,Ailurus_010029,Ailurus_016805,Ailurus_022251,Ailurus_013776,Ailurus_002610,Ailurus_012652,Ailurus_021127,Ailurus_022215,Ailurus_009276,Ailurus_023311,Ailurus_014819,Ailurus_012630,Ailurus_006195,Ailurus_025946,Ailurus_020014,Ailurus_000643,Ailurus_006185,Ailurus_010462,Ailurus_018196,Ailurus_022205,Ailurus_001516,Ailurus_012628,Ailurus_023754,Ailurus_0…
GO:BP	cell activation	GO:0001775	1.11e-15	2.09e-12	164	1349	Ailurus_023330,Ailurus_016805,Ailurus_013776,Ailurus_019084,Ailurus_002610,Ailurus_012894,Ailurus_012892,Ailurus_020276,Ailurus_020051,Ailurus_023318,Ailurus_014819,Ailurus_006195,Ailurus_025946,Ailurus_000409,Ailurus_000643,Ailurus_006185,Ailurus_010462,Ailurus_025957,Ailurus_018196,Ailurus_013947,Ailurus_002603,Ailurus_004409,Ailurus_004408,Ailurus_015792,Ailurus_000288,Ailurus_022091,Ailurus_0…
GO:BP	leukocyte activation	GO:0045321	2.11e-15	3.17e-12	150	1205	Ailurus_023330,Ailurus_016805,Ailurus_013776,Ailurus_019084,Ailurus_002610,Ailurus_012894,Ailurus_012892,Ailurus_020276,Ailurus_020051,Ailurus_023318,Ailurus_014819,Ailurus_025946,Ailurus_000409,Ailurus_000643,Ailurus_006185,Ailurus_010462,Ailurus_025957,Ailurus_018196,Ailurus_013947,Ailurus_002603,Ailurus_004409,Ailurus_004408,Ailurus_015792,Ailurus_000288,Ailurus_022091,Ailurus_018825,Ailurus_0…
GO:BP	inflammatory response	GO:0006954	9.88e-15	1.24e-11	98	666	Ailurus_000685,Ailurus_000684,Ailurus_022251,Ailurus_002610,Ailurus_022215,Ailurus_009276,Ailurus_006195,Ailurus_025946,Ailurus_020014,Ailurus_000643,Ailurus_006185,Ailurus_022205,Ailurus_001516,Ailurus_023754,Ailurus_004409,Ailurus_004408,Ailurus_000288,Ailurus_000035,Ailurus_010076,Ailurus_016870,Ailurus_011152,Ailurus_026852,Ailurus_014643,Ailurus_025533,Ailurus_004612,Ailurus_022911,Ailurus_0…
GO:BP	myeloid leukocyte activation	GO:0002274	1.11e-14	1.19e-11	93	617	Ailurus_016805,Ailurus_013776,Ailurus_019084,Ailurus_002610,Ailurus_012894,Ailurus_020276,Ailurus_000643,Ailurus_006185,Ailurus_025957,Ailurus_002603,Ailurus_022091,Ailurus_026204,Ailurus_000035,Ailurus_010085,Ailurus_026883,Ailurus_002668,Ailurus_000481,Ailurus_000238,Ailurus_000237,Ailurus_015969,Ailurus_000032,Ailurus_010284,Ailurus_000029,Ailurus_004620,Ailurus_011381,Ailurus_001586,Ailurus_0…
GO:BP	leukocyte activation involved in immune response	GO:0002366	1.94e-13	1.83e-10	95	667	Ailurus_016805,Ailurus_013776,Ailurus_002610,Ailurus_012894,Ailurus_020276,Ailurus_000643,Ailurus_006185,Ailurus_025957,Ailurus_013947,Ailurus_002603,Ailurus_000288,Ailurus_022091,Ailurus_026204,Ailurus_000035,Ailurus_010085,Ailurus_026883,Ailurus_000481,Ailurus_000238,Ailurus_000237,Ailurus_015969,Ailurus_000032,Ailurus_010284,Ailurus_000029,Ailurus_004620,Ailurus_011381,Ailurus_001586,Ailurus_0…
GO:BP	leukocyte mediated immunity	GO:0002443	2.19e-13	1.83e-10	101	731	Ailurus_023330,Ailurus_016805,Ailurus_013776,Ailurus_002610,Ailurus_022249,Ailurus_012894,Ailurus_020276,Ailurus_023318,Ailurus_014819,Ailurus_000643,Ailurus_006185,Ailurus_025957,Ailurus_002603,Ailurus_000288,Ailurus_022091,Ailurus_026204,Ailurus_010085,Ailurus_026883,Ailurus_000481,Ailurus_000238,Ailurus_000237,Ailurus_015969,Ailurus_000032,Ailurus_010284,Ailurus_000029,Ailurus_004620,Ailurus_0…
GO:BP	cell activation involved in immune response	GO:0002263	3.05e-13	2.29e-10	95	672	Ailurus_016805,Ailurus_013776,Ailurus_002610,Ailurus_012894,Ailurus_020276,Ailurus_000643,Ailurus_006185,Ailurus_025957,Ailurus_013947,Ailurus_002603,Ailurus_000288,Ailurus_022091,Ailurus_026204,Ailurus_000035,Ailurus_010085,Ailurus_026883,Ailurus_000481,Ailurus_000238,Ailurus_000237,Ailurus_015969,Ailurus_000032,Ailurus_010284,Ailurus_000029,Ailurus_004620,Ailurus_011381,Ailurus_001586,Ailurus_0…
GO:BP	leukocyte degranulation	GO:0043299	5.94e-13	4.06e-10	77	497	Ailurus_016805,Ailurus_013776,Ailurus_002610,Ailurus_012894,Ailurus_020276,Ailurus_000643,Ailurus_006185,Ailurus_025957,Ailurus_002603,Ailurus_022091,Ailurus_026204,Ailurus_010085,Ailurus_016870,Ailurus_026883,Ailurus_000481,Ailurus_000238,Ailurus_000237,Ailurus_015969,Ailurus_000032,Ailurus_010284,Ailurus_000029,Ailurus_004620,Ailurus_011381,Ailurus_001586,Ailurus_025533,Ailurus_004612,Ailurus_0…
GO:BP	myeloid leukocyte mediated immunity	GO:0002444	1.52e-12	9.55e-10	78	516	Ailurus_016805,Ailurus_013776,Ailurus_002610,Ailurus_012894,Ailurus_020276,Ailurus_000643,Ailurus_006185,Ailurus_025957,Ailurus_002603,Ailurus_022091,Ailurus_026204,Ailurus_010085,Ailurus_026883,Ailurus_000481,Ailurus_000238,Ailurus_000237,Ailurus_015969,Ailurus_000032,Ailurus_010284,Ailurus_000029,Ailurus_004620,Ailurus_011381,Ailurus_001586,Ailurus_025533,Ailurus_004612,Ailurus_003153,Ailurus_0…
GO:BP	myeloid cell activation involved in immune response	GO:0002275	1.67e-12	9.69e-10	77	507	Ailurus_016805,Ailurus_013776,Ailurus_002610,Ailurus_012894,Ailurus_020276,Ailurus_000643,Ailurus_006185,Ailurus_025957,Ailurus_002603,Ailurus_022091,Ailurus_026204,Ailurus_000035,Ailurus_010085,Ailurus_026883,Ailurus_000481,Ailurus_000238,Ailurus_000237,Ailurus_015969,Ailurus_000032,Ailurus_010284,Ailurus_000029,Ailurus_004620,Ailurus_011381,Ailurus_001586,Ailurus_025533,Ailurus_004612,Ailurus_0…
GO:BP	immune effector process	GO:0002252	1.81e-12	9.73e-10	130	1078	Ailurus_023330,Ailurus_016805,Ailurus_022251,Ailurus_013776,Ailurus_002610,Ailurus_022249,Ailurus_012894,Ailurus_020276,Ailurus_023318,Ailurus_023311,Ailurus_014819,Ailurus_020014,Ailurus_000409,Ailurus_000643,Ailurus_006185,Ailurus_025957,Ailurus_018196,Ailurus_013947,Ailurus_000660,Ailurus_002603,Ailurus_000288,Ailurus_022091,Ailurus_000281,Ailurus_026204,Ailurus_000035,Ailurus_010085,Ailurus_0…
GO:BP	neutrophil mediated immunity	GO:0002446	2.65e-12	1.33e-09	73	472	Ailurus_016805,Ailurus_013776,Ailurus_002610,Ailurus_012894,Ailurus_020276,Ailurus_000643,Ailurus_006185,Ailurus_025957,Ailurus_002603,Ailurus_022091,Ailurus_026204,Ailurus_010085,Ailurus_026883,Ailurus_000481,Ailurus_000238,Ailurus_000237,Ailurus_015969,Ailurus_000032,Ailurus_010284,Ailurus_000029,Ailurus_004620,Ailurus_011381,Ailurus_001586,Ailurus_004612,Ailurus_003153,Ailurus_003172,Ailurus_0…
GO:BP	granulocyte activation	GO:0036230	4.4e-12	2.07e-09	72	467	Ailurus_016805,Ailurus_013776,Ailurus_002610,Ailurus_012894,Ailurus_020276,Ailurus_000643,Ailurus_006185,Ailurus_025957,Ailurus_002603,Ailurus_022091,Ailurus_026204,Ailurus_010085,Ailurus_026883,Ailurus_000481,Ailurus_000238,Ailurus_000237,Ailurus_015969,Ailurus_000032,Ailurus_010284,Ailurus_000029,Ailurus_004620,Ailurus_011381,Ailurus_001586,Ailurus_025533,Ailurus_004612,Ailurus_003153,Ailurus_0…
GO:BP	neutrophil degranulation	GO:0043312	7.92e-12	3.51e-09	70	453	Ailurus_016805,Ailurus_013776,Ailurus_002610,Ailurus_012894,Ailurus_020276,Ailurus_000643,Ailurus_006185,Ailurus_025957,Ailurus_002603,Ailurus_022091,Ailurus_026204,Ailurus_010085,Ailurus_026883,Ailurus_000481,Ailurus_000238,Ailurus_000237,Ailurus_015969,Ailurus_000032,Ailurus_010284,Ailurus_000029,Ailurus_004620,Ailurus_011381,Ailurus_001586,Ailurus_004612,Ailurus_003153,Ailurus_003172,Ailurus_0…
GO:BP	neutrophil activation	GO:0042119	8.06e-12	3.37e-09	71	463	Ailurus_016805,Ailurus_013776,Ailurus_002610,Ailurus_012894,Ailurus_020276,Ailurus_000643,Ailurus_006185,Ailurus_025957,Ailurus_002603,Ailurus_022091,Ailurus_026204,Ailurus_010085,Ailurus_026883,Ailurus_000481,Ailurus_000238,Ailurus_000237,Ailurus_015969,Ailurus_000032,Ailurus_010284,Ailurus_000029,Ailurus_004620,Ailurus_011381,Ailurus_001586,Ailurus_004612,Ailurus_003153,Ailurus_003172,Ailurus_0…
GO:BP	defense response to other organism	GO:0098542	9.38e-12	3.72e-09	108	854	Ailurus_023330,Ailurus_010029,Ailurus_016805,Ailurus_013776,Ailurus_012652,Ailurus_021127,Ailurus_009276,Ailurus_023311,Ailurus_014819,Ailurus_012630,Ailurus_020014,Ailurus_000643,Ailurus_010462,Ailurus_018196,Ailurus_012628,Ailurus_000294,Ailurus_022091,Ailurus_000281,Ailurus_026694,Ailurus_018825,Ailurus_010085,Ailurus_005995,Ailurus_016870,Ailurus_026883,Ailurus_002668,Ailurus_000238,Ailurus_0…
GO:BP	neutrophil activation involved in immune response	GO:0002283	9.76e-12	3.67e-09	70	455	Ailurus_016805,Ailurus_013776,Ailurus_002610,Ailurus_012894,Ailurus_020276,Ailurus_000643,Ailurus_006185,Ailurus_025957,Ailurus_002603,Ailurus_022091,Ailurus_026204,Ailurus_010085,Ailurus_026883,Ailurus_000481,Ailurus_000238,Ailurus_000237,Ailurus_015969,Ailurus_000032,Ailurus_010284,Ailurus_000029,Ailurus_004620,Ailurus_011381,Ailurus_001586,Ailurus_004612,Ailurus_003153,Ailurus_003172,Ailurus_0…
GO:BP	regulated exocytosis	GO:0045055	6.47e-11	2.32e-08	95	737	Ailurus_016805,Ailurus_013776,Ailurus_002610,Ailurus_012894,Ailurus_010473,Ailurus_020276,Ailurus_021365,Ailurus_022215,Ailurus_000643,Ailurus_006185,Ailurus_025957,Ailurus_002603,Ailurus_022091,Ailurus_026204,Ailurus_000037,Ailurus_010085,Ailurus_016870,Ailurus_026883,Ailurus_000481,Ailurus_000238,Ailurus_000237,Ailurus_015969,Ailurus_000032,Ailurus_016814,Ailurus_010284,Ailurus_000029,Ailurus_0…
GO:BP	response to other organism	GO:0051707	2.59e-10	8.86e-08	136	1230	Ailurus_023330,Ailurus_000685,Ailurus_000684,Ailurus_010029,Ailurus_016805,Ailurus_013776,Ailurus_012652,Ailurus_021127,Ailurus_022215,Ailurus_009276,Ailurus_023311,Ailurus_014819,Ailurus_012630,Ailurus_020014,Ailurus_000643,Ailurus_007039,Ailurus_006185,Ailurus_010462,Ailurus_018196,Ailurus_012628,Ailurus_000294,Ailurus_022091,Ailurus_000281,Ailurus_026694,Ailurus_018825,Ailurus_000035,Ailurus_0…
GO:BP	response to external biotic stimulus	GO:0043207	2.89e-10	9.46e-08	136	1232	Ailurus_023330,Ailurus_000685,Ailurus_000684,Ailurus_010029,Ailurus_016805,Ailurus_013776,Ailurus_012652,Ailurus_021127,Ailurus_022215,Ailurus_009276,Ailurus_023311,Ailurus_014819,Ailurus_012630,Ailurus_020014,Ailurus_000643,Ailurus_007039,Ailurus_006185,Ailurus_010462,Ailurus_018196,Ailurus_012628,Ailurus_000294,Ailurus_022091,Ailurus_000281,Ailurus_026694,Ailurus_018825,Ailurus_000035,Ailurus_0…
GO:BP	response to biotic stimulus	GO:0009607	9.4e-10	2.95e-07	137	1266	Ailurus_023330,Ailurus_000685,Ailurus_000684,Ailurus_010029,Ailurus_016805,Ailurus_013776,Ailurus_012652,Ailurus_021127,Ailurus_022215,Ailurus_009276,Ailurus_023311,Ailurus_014819,Ailurus_012630,Ailurus_020014,Ailurus_000643,Ailurus_007039,Ailurus_006185,Ailurus_010462,Ailurus_018196,Ailurus_012628,Ailurus_000294,Ailurus_022091,Ailurus_000281,Ailurus_026694,Ailurus_018825,Ailurus_000035,Ailurus_0…
GO:BP	response to external stimulus	GO:0009605	9.85e-10	2.96e-07	244	2638	Ailurus_023330,Ailurus_000685,Ailurus_000684,Ailurus_023323,Ailurus_026836,Ailurus_026834,Ailurus_010029,Ailurus_016805,Ailurus_022251,Ailurus_013776,Ailurus_003942,Ailurus_002610,Ailurus_012652,Ailurus_012892,Ailurus_021127,Ailurus_022215,Ailurus_003970,Ailurus_009276,Ailurus_020051,Ailurus_023311,Ailurus_014819,Ailurus_012630,Ailurus_006195,Ailurus_020014,Ailurus_000643,Ailurus_007039,Ailurus_0…
GO:BP	regulation of inflammatory response	GO:0050727	3.04e-09	8.8e-07	57	383	Ailurus_000685,Ailurus_000684,Ailurus_022251,Ailurus_009276,Ailurus_020014,Ailurus_006185,Ailurus_023754,Ailurus_000035,Ailurus_016870,Ailurus_011152,Ailurus_026852,Ailurus_014643,Ailurus_022911,Ailurus_009718,Ailurus_001187,Ailurus_027328,Ailurus_006412,Ailurus_026214,Ailurus_005170,Ailurus_024942,Ailurus_008224,Ailurus_006040,Ailurus_021890,Ailurus_027177,Ailurus_027148,Ailurus_022931,Ailurus_0…
GO:BP	vesicle-mediated transport	GO:0016192	4.27e-09	1.19e-06	193	2004	Ailurus_015702,Ailurus_010016,Ailurus_010029,Ailurus_016805,Ailurus_013776,Ailurus_025756,Ailurus_002610,Ailurus_012894,Ailurus_012652,Ailurus_010473,Ailurus_020281,Ailurus_020276,Ailurus_021365,Ailurus_022215,Ailurus_002639,Ailurus_000643,Ailurus_006185,Ailurus_020269,Ailurus_025957,Ailurus_022684,Ailurus_018196,Ailurus_013947,Ailurus_000660,Ailurus_002603,Ailurus_010686,Ailurus_018810,Ailurus_0…
GO:BP	regulation of response to stimulus	GO:0048583	4.29e-09	1.15e-06	348	4119	Ailurus_000685,Ailurus_000684,Ailurus_024896,Ailurus_023323,Ailurus_024898,Ailurus_012449,Ailurus_022251,Ailurus_003942,Ailurus_002610,Ailurus_022249,Ailurus_012652,Ailurus_020276,Ailurus_022214,Ailurus_022215,Ailurus_003970,Ailurus_024891,Ailurus_009276,Ailurus_020051,Ailurus_023318,Ailurus_022222,Ailurus_023311,Ailurus_022227,Ailurus_014819,Ailurus_006195,Ailurus_013960,Ailurus_020014,Ailurus_0…
GO:BP	GO:BP involved in interspecies interaction between organisms	GO:0044419	5.62e-09	1.46e-06	157	1550	Ailurus_023330,Ailurus_000685,Ailurus_000684,Ailurus_026836,Ailurus_010029,Ailurus_016805,Ailurus_013776,Ailurus_012652,Ailurus_021127,Ailurus_002648,Ailurus_022215,Ailurus_009276,Ailurus_023311,Ailurus_022226,Ailurus_014819,Ailurus_012630,Ailurus_020014,Ailurus_000643,Ailurus_007039,Ailurus_006185,Ailurus_010462,Ailurus_018196,Ailurus_022205,Ailurus_012628,Ailurus_020002,Ailurus_000294,Ailurus_0…
GO:BP	innate immune response	GO:0045087	8.97e-09	2.25e-06	84	684	Ailurus_016805,Ailurus_013776,Ailurus_012652,Ailurus_021127,Ailurus_009276,Ailurus_014819,Ailurus_012630,Ailurus_020014,Ailurus_000643,Ailurus_010462,Ailurus_018196,Ailurus_012628,Ailurus_000294,Ailurus_022091,Ailurus_000281,Ailurus_026694,Ailurus_005995,Ailurus_016870,Ailurus_026883,Ailurus_002668,Ailurus_000238,Ailurus_026852,Ailurus_025533,Ailurus_004612,Ailurus_018658,Ailurus_017305,Ailurus_0…
GO:BP	exocytosis	GO:0006887	1.54e-08	3.73e-06	103	911	Ailurus_016805,Ailurus_013776,Ailurus_025756,Ailurus_002610,Ailurus_012894,Ailurus_010473,Ailurus_020276,Ailurus_021365,Ailurus_022215,Ailurus_000643,Ailurus_006185,Ailurus_020269,Ailurus_025957,Ailurus_018196,Ailurus_002603,Ailurus_022091,Ailurus_026204,Ailurus_000037,Ailurus_010085,Ailurus_014686,Ailurus_016870,Ailurus_026883,Ailurus_000481,Ailurus_000238,Ailurus_000237,Ailurus_015969,Ailurus_0…
GO:BP	regulation of defense response	GO:0031347	7.38e-08	1.73e-05	83	705	Ailurus_000685,Ailurus_000684,Ailurus_022251,Ailurus_012652,Ailurus_009276,Ailurus_014819,Ailurus_020014,Ailurus_006185,Ailurus_010462,Ailurus_023754,Ailurus_000294,Ailurus_026694,Ailurus_000035,Ailurus_016870,Ailurus_011152,Ailurus_002668,Ailurus_026852,Ailurus_014643,Ailurus_018658,Ailurus_022911,Ailurus_017305,Ailurus_009718,Ailurus_027105,Ailurus_001187,Ailurus_027328,Ailurus_018633,Ailurus_0…
GO:BP	secretion by cell	GO:0032940	7.94e-08	1.81e-05	158	1625	Ailurus_016805,Ailurus_013776,Ailurus_026849,Ailurus_025756,Ailurus_002610,Ailurus_022249,Ailurus_012894,Ailurus_010473,Ailurus_020276,Ailurus_021365,Ailurus_022215,Ailurus_003970,Ailurus_000643,Ailurus_006185,Ailurus_010462,Ailurus_020269,Ailurus_025957,Ailurus_018196,Ailurus_002603,Ailurus_020487,Ailurus_023754,Ailurus_004401,Ailurus_022091,Ailurus_026204,Ailurus_000039,Ailurus_000037,Ailurus_0…
GO:BP	export from cell	GO:0140352	1.5e-07	3.33e-05	159	1654	Ailurus_016805,Ailurus_013776,Ailurus_026849,Ailurus_025756,Ailurus_002610,Ailurus_022249,Ailurus_012894,Ailurus_010473,Ailurus_020276,Ailurus_021365,Ailurus_022215,Ailurus_003970,Ailurus_000643,Ailurus_006185,Ailurus_010462,Ailurus_020269,Ailurus_025957,Ailurus_018196,Ailurus_002603,Ailurus_020487,Ailurus_023754,Ailurus_004401,Ailurus_022091,Ailurus_026204,Ailurus_000039,Ailurus_000037,Ailurus_0…
GO:BP	regulation of immune system process	GO:0002682	3.6e-07	7.74e-05	140	1432	Ailurus_000685,Ailurus_000684,Ailurus_016805,Ailurus_022251,Ailurus_019084,Ailurus_002610,Ailurus_022249,Ailurus_012652,Ailurus_012892,Ailurus_022215,Ailurus_009276,Ailurus_009275,Ailurus_013994,Ailurus_020051,Ailurus_023318,Ailurus_014819,Ailurus_013965,Ailurus_020257,Ailurus_020014,Ailurus_000409,Ailurus_010462,Ailurus_018196,Ailurus_013947,Ailurus_000660,Ailurus_000294,Ailurus_025102,Ailurus_0…
GO:BP	negative regulation of inflammatory response	GO:0050728	3.72e-07	7.77e-05	27	142	Ailurus_000685,Ailurus_000684,Ailurus_020014,Ailurus_006185,Ailurus_023754,Ailurus_001187,Ailurus_027328,Ailurus_006412,Ailurus_026214,Ailurus_005170,Ailurus_024942,Ailurus_008224,Ailurus_006040,Ailurus_021890,Ailurus_027148,Ailurus_018689,Ailurus_014730,Ailurus_024532,Ailurus_012778,Ailurus_000340,Ailurus_026308,Ailurus_025458,Ailurus_000146,Ailurus_006550,Ailurus_016539,Ailurus_007496,Ailurus_0…
GO:BP	response to stress	GO:0006950	4.32e-07	8.78e-05	318	3861	Ailurus_023330,Ailurus_000685,Ailurus_000684,Ailurus_024898,Ailurus_010029,Ailurus_016805,Ailurus_022251,Ailurus_013776,Ailurus_002610,Ailurus_022249,Ailurus_012652,Ailurus_012892,Ailurus_021127,Ailurus_020276,Ailurus_022215,Ailurus_003970,Ailurus_009276,Ailurus_020051,Ailurus_023311,Ailurus_022227,Ailurus_014819,Ailurus_012630,Ailurus_006195,Ailurus_013960,Ailurus_013965,Ailurus_025946,Ailurus_0…
GO:BP	secretion	GO:0046903	4.8e-07	9.5e-05	165	1763	Ailurus_016805,Ailurus_013776,Ailurus_026849,Ailurus_025756,Ailurus_002610,Ailurus_022249,Ailurus_012894,Ailurus_010473,Ailurus_020276,Ailurus_021365,Ailurus_022215,Ailurus_003970,Ailurus_000643,Ailurus_006185,Ailurus_010462,Ailurus_020269,Ailurus_025957,Ailurus_018196,Ailurus_002603,Ailurus_020487,Ailurus_023754,Ailurus_023167,Ailurus_004401,Ailurus_022091,Ailurus_026204,Ailurus_000039,Ailurus_0…
GO:BP	apoptotic signaling pathway	GO:0097190	8.15e-07	0.000157	76	664	Ailurus_000685,Ailurus_000684,Ailurus_023323,Ailurus_022249,Ailurus_012892,Ailurus_003970,Ailurus_023311,Ailurus_022227,Ailurus_006185,Ailurus_008395,Ailurus_002609,Ailurus_022650,Ailurus_025344,Ailurus_023167,Ailurus_025102,Ailurus_000288,Ailurus_024499,Ailurus_022091,Ailurus_026205,Ailurus_002655,Ailurus_009082,Ailurus_016827,Ailurus_018658,Ailurus_008872,Ailurus_014029,Ailurus_006038,Ailurus_0…
GO:BP	positive regulation of GO:BP	GO:0048518	9.44e-07	0.000178	475	6194	Ailurus_023330,Ailurus_015700,Ailurus_015702,Ailurus_020053,Ailurus_000685,Ailurus_000684,Ailurus_024896,Ailurus_023323,Ailurus_024898,Ailurus_026836,Ailurus_026834,Ailurus_010029,Ailurus_016805,Ailurus_023340,Ailurus_022251,Ailurus_026849,Ailurus_003942,Ailurus_019084,Ailurus_002614,Ailurus_002610,Ailurus_022249,Ailurus_012652,Ailurus_010473,Ailurus_012892,Ailurus_020281,Ailurus_020276,Ailurus_0…
GO:BP	myeloid cell differentiation	GO:0030099	9.96e-07	0.000183	56	441	Ailurus_010029,Ailurus_019084,Ailurus_010473,Ailurus_009275,Ailurus_013994,Ailurus_012630,Ailurus_013965,Ailurus_020257,Ailurus_018196,Ailurus_013947,Ailurus_013956,Ailurus_018828,Ailurus_000035,Ailurus_026883,Ailurus_009057,Ailurus_002655,Ailurus_020092,Ailurus_025533,Ailurus_018658,Ailurus_027105,Ailurus_004202,Ailurus_014029,Ailurus_018486,Ailurus_018209,Ailurus_014732,Ailurus_024793,Ailurus_0…
GO:BP	tumor necrosis factor-mediated signaling pathway	GO:0033209	1.07e-06	0.000192	23	115	Ailurus_022249,Ailurus_006185,Ailurus_008395,Ailurus_005989,Ailurus_016827,Ailurus_004202,Ailurus_000081,Ailurus_006038,Ailurus_006037,Ailurus_019591,Ailurus_008224,Ailurus_018689,Ailurus_014732,Ailurus_014730,Ailurus_022373,Ailurus_012737,Ailurus_012736,Ailurus_006081,Ailurus_013493,Ailurus_000188,Ailurus_008750,Ailurus_026599,Ailurus_021991,
GO:BP	defense response to bacterium	GO:0042742	1.16e-06	0.000203	34	215	Ailurus_010029,Ailurus_000643,Ailurus_010462,Ailurus_010085,Ailurus_016870,Ailurus_004612,Ailurus_003172,Ailurus_008811,Ailurus_012967,Ailurus_027148,Ailurus_014730,Ailurus_024532,Ailurus_024793,Ailurus_012562,Ailurus_010119,Ailurus_000340,Ailurus_024970,Ailurus_000782,Ailurus_000771,Ailurus_024961,Ailurus_025002,Ailurus_025457,Ailurus_025458,Ailurus_024795,Ailurus_004120,Ailurus_008750,Ailurus_0…
GO:BP	lymphocyte activation	GO:0046649	1.19e-06	0.000204	78	694	Ailurus_023330,Ailurus_016805,Ailurus_013776,Ailurus_019084,Ailurus_002610,Ailurus_012892,Ailurus_020051,Ailurus_023318,Ailurus_014819,Ailurus_025946,Ailurus_000409,Ailurus_010462,Ailurus_018196,Ailurus_013947,Ailurus_004409,Ailurus_004408,Ailurus_015792,Ailurus_000288,Ailurus_018825,Ailurus_014686,Ailurus_005989,Ailurus_002668,Ailurus_004612,Ailurus_018658,Ailurus_022911,Ailurus_027105,Ailurus_0…
GO:BP	response to cytokine	GO:0034097	1.26e-06	0.000211	119	1196	Ailurus_013776,Ailurus_022249,Ailurus_012892,Ailurus_021127,Ailurus_013994,Ailurus_023314,Ailurus_006185,Ailurus_010462,Ailurus_018196,Ailurus_008395,Ailurus_002607,Ailurus_012628,Ailurus_013956,Ailurus_000650,Ailurus_004409,Ailurus_004408,Ailurus_025102,Ailurus_000288,Ailurus_022091,Ailurus_000281,Ailurus_026694,Ailurus_017977,Ailurus_000035,Ailurus_005995,Ailurus_016870,Ailurus_005989,Ailurus_0…
GO:BP	interleukin-8 production	GO:0032637	1.33e-06	0.000217	17	69	Ailurus_000643,Ailurus_026852,Ailurus_018658,Ailurus_021890,Ailurus_027177,Ailurus_024532,Ailurus_024970,Ailurus_012737,Ailurus_012736,Ailurus_000771,Ailurus_025457,Ailurus_025458,Ailurus_000111,Ailurus_008750,Ailurus_024186,Ailurus_027096,Ailurus_011924,
GO:BP	regulation of interleukin-8 production	GO:0032677	1.75e-06	0.000281	16	63	Ailurus_000643,Ailurus_026852,Ailurus_018658,Ailurus_021890,Ailurus_027177,Ailurus_024532,Ailurus_024970,Ailurus_012737,Ailurus_012736,Ailurus_000771,Ailurus_025458,Ailurus_000111,Ailurus_008750,Ailurus_024186,Ailurus_027096,Ailurus_011924,
GO:BP	cell death	GO:0008219	2.01e-06	0.000315	204	2328	Ailurus_023330,Ailurus_000685,Ailurus_000684,Ailurus_023323,Ailurus_026836,Ailurus_023340,Ailurus_019084,Ailurus_002614,Ailurus_022249,Ailurus_010473,Ailurus_012892,Ailurus_022215,Ailurus_003970,Ailurus_024891,Ailurus_013994,Ailurus_023311,Ailurus_022227,Ailurus_006195,Ailurus_013960,Ailurus_020257,Ailurus_000409,Ailurus_006185,Ailurus_010462,Ailurus_018196,Ailurus_022205,Ailurus_013947,Ailurus_0…
GO:BP	cytokine production	GO:0001816	2.11e-06	0.000325	81	740	Ailurus_010029,Ailurus_022249,Ailurus_012652,Ailurus_022213,Ailurus_022215,Ailurus_023318,Ailurus_020014,Ailurus_000643,Ailurus_010462,Ailurus_013947,Ailurus_000650,Ailurus_023754,Ailurus_018825,Ailurus_017977,Ailurus_011152,Ailurus_026852,Ailurus_014643,Ailurus_004612,Ailurus_018658,Ailurus_017305,Ailurus_027105,Ailurus_006038,Ailurus_024942,Ailurus_021890,Ailurus_027177,Ailurus_008650,Ailurus_0…
GO:BP	regulation of response to external stimulus	GO:0032101	2.24e-06	0.000337	103	1009	Ailurus_000685,Ailurus_000684,Ailurus_022251,Ailurus_003942,Ailurus_012652,Ailurus_022215,Ailurus_003970,Ailurus_009276,Ailurus_014819,Ailurus_006195,Ailurus_020014,Ailurus_006185,Ailurus_010462,Ailurus_022650,Ailurus_023754,Ailurus_000294,Ailurus_025102,Ailurus_026694,Ailurus_017977,Ailurus_000035,Ailurus_016870,Ailurus_011152,Ailurus_002668,Ailurus_026852,Ailurus_014643,Ailurus_025533,Ailurus_0…
GO:BP	import into cell	GO:0098657	2.48e-06	0.000366	71	625	Ailurus_010016,Ailurus_010029,Ailurus_016805,Ailurus_002610,Ailurus_012652,Ailurus_020281,Ailurus_002639,Ailurus_025957,Ailurus_022684,Ailurus_018196,Ailurus_013947,Ailurus_000660,Ailurus_002603,Ailurus_010686,Ailurus_018810,Ailurus_018811,Ailurus_023167,Ailurus_022091,Ailurus_005995,Ailurus_004420,Ailurus_016870,Ailurus_000031,Ailurus_000030,Ailurus_004620,Ailurus_004612,Ailurus_014280,Ailurus_0…
GO:BP	extrinsic apoptotic signaling pathway	GO:0097191	2.5e-06	0.000361	36	242	Ailurus_000685,Ailurus_000684,Ailurus_023323,Ailurus_022249,Ailurus_003970,Ailurus_006185,Ailurus_008395,Ailurus_000288,Ailurus_024499,Ailurus_022091,Ailurus_026205,Ailurus_002655,Ailurus_009082,Ailurus_016827,Ailurus_018658,Ailurus_014029,Ailurus_006038,Ailurus_018689,Ailurus_014732,Ailurus_014730,Ailurus_009153,Ailurus_024970,Ailurus_012737,Ailurus_012736,Ailurus_010329,Ailurus_013493,Ailurus_0…
GO:BP	regulation of signal transduction	GO:0009966	2.99e-06	0.000424	269	3243	Ailurus_000685,Ailurus_000684,Ailurus_024896,Ailurus_023323,Ailurus_024898,Ailurus_012449,Ailurus_003942,Ailurus_022249,Ailurus_012652,Ailurus_020276,Ailurus_022214,Ailurus_022215,Ailurus_003970,Ailurus_024891,Ailurus_009276,Ailurus_023318,Ailurus_022222,Ailurus_023311,Ailurus_022227,Ailurus_013960,Ailurus_020014,Ailurus_000409,Ailurus_025957,Ailurus_018196,Ailurus_013947,Ailurus_008395,Ailurus_0…
GO:BP	apoptotic process	GO:0006915	3.19e-06	0.000445	181	2032	Ailurus_023330,Ailurus_000685,Ailurus_000684,Ailurus_023323,Ailurus_026836,Ailurus_023340,Ailurus_019084,Ailurus_002614,Ailurus_022249,Ailurus_010473,Ailurus_012892,Ailurus_022215,Ailurus_003970,Ailurus_024891,Ailurus_013994,Ailurus_023311,Ailurus_022227,Ailurus_006195,Ailurus_013960,Ailurus_020257,Ailurus_000409,Ailurus_006185,Ailurus_010462,Ailurus_018196,Ailurus_022205,Ailurus_013947,Ailurus_0…
GO:BP	regulation of cell death	GO:0010941	4.42e-06	0.000605	173	1935	Ailurus_023330,Ailurus_000685,Ailurus_000684,Ailurus_023323,Ailurus_026836,Ailurus_023340,Ailurus_002614,Ailurus_022249,Ailurus_010473,Ailurus_012892,Ailurus_022215,Ailurus_003970,Ailurus_024891,Ailurus_013994,Ailurus_023311,Ailurus_022227,Ailurus_006195,Ailurus_013960,Ailurus_006185,Ailurus_010462,Ailurus_018196,Ailurus_022205,Ailurus_013947,Ailurus_020480,Ailurus_008395,Ailurus_002609,Ailurus_0…
GO:BP	response to stimulus	GO:0050896	4.53e-06	0.000609	628	8619	Ailurus_023330,Ailurus_000685,Ailurus_000684,Ailurus_024896,Ailurus_023323,Ailurus_024411,Ailurus_024898,Ailurus_026836,Ailurus_026834,Ailurus_010029,Ailurus_012449,Ailurus_016805,Ailurus_022251,Ailurus_013776,Ailurus_026849,Ailurus_002615,Ailurus_003942,Ailurus_019084,Ailurus_019082,Ailurus_002610,Ailurus_022249,Ailurus_009049,Ailurus_012894,Ailurus_012652,Ailurus_012892,Ailurus_021127,Ailurus_0…
GO:BP	response to bacterium	GO:0009617	4.74e-06	0.000625	69	613	Ailurus_000685,Ailurus_000684,Ailurus_010029,Ailurus_022215,Ailurus_000643,Ailurus_007039,Ailurus_006185,Ailurus_010462,Ailurus_022091,Ailurus_000035,Ailurus_010085,Ailurus_016870,Ailurus_002668,Ailurus_025533,Ailurus_004612,Ailurus_017305,Ailurus_003172,Ailurus_026243,Ailurus_026214,Ailurus_008811,Ailurus_006038,Ailurus_006037,Ailurus_019591,Ailurus_012967,Ailurus_016078,Ailurus_010713,Ailurus_0…
GO:BP	reactive oxygen species metabolic process	GO:0072593	5.71e-06	0.000741	40	292	Ailurus_000685,Ailurus_000684,Ailurus_002610,Ailurus_012892,Ailurus_023311,Ailurus_010462,Ailurus_004409,Ailurus_004408,Ailurus_000288,Ailurus_018826,Ailurus_008846,Ailurus_009718,Ailurus_004202,Ailurus_004200,Ailurus_008811,Ailurus_012728,Ailurus_000716,Ailurus_021890,Ailurus_008402,Ailurus_006250,Ailurus_018689,Ailurus_024532,Ailurus_000311,Ailurus_001674,Ailurus_000340,Ailurus_002754,Ailurus_0…
GO:BP	endocytosis	GO:0006897	5.84e-06	0.000745	73	664	Ailurus_010016,Ailurus_010029,Ailurus_016805,Ailurus_002610,Ailurus_012652,Ailurus_020281,Ailurus_002639,Ailurus_025957,Ailurus_022684,Ailurus_018196,Ailurus_013947,Ailurus_000660,Ailurus_010686,Ailurus_018810,Ailurus_018811,Ailurus_023167,Ailurus_005995,Ailurus_004420,Ailurus_016870,Ailurus_000031,Ailurus_000030,Ailurus_016814,Ailurus_000029,Ailurus_004620,Ailurus_002681,Ailurus_004612,Ailurus_0…
GO:BP	negative regulation of defense response	GO:0031348	7.12e-06	0.000893	31	203	Ailurus_000685,Ailurus_000684,Ailurus_014819,Ailurus_020014,Ailurus_006185,Ailurus_010462,Ailurus_023754,Ailurus_001187,Ailurus_027328,Ailurus_006412,Ailurus_026214,Ailurus_005170,Ailurus_024942,Ailurus_008224,Ailurus_006040,Ailurus_021890,Ailurus_027148,Ailurus_018689,Ailurus_014730,Ailurus_024532,Ailurus_012778,Ailurus_000340,Ailurus_026308,Ailurus_025458,Ailurus_000111,Ailurus_000146,Ailurus_0…
GO:BP	negative regulation of immune system process	GO:0002683	7.94e-06	0.00098	54	449	Ailurus_000685,Ailurus_000684,Ailurus_022215,Ailurus_009275,Ailurus_023318,Ailurus_014819,Ailurus_020014,Ailurus_000409,Ailurus_010462,Ailurus_013947,Ailurus_020092,Ailurus_025533,Ailurus_018658,Ailurus_022911,Ailurus_001187,Ailurus_004202,Ailurus_018633,Ailurus_006412,Ailurus_006038,Ailurus_027177,Ailurus_008650,Ailurus_027148,Ailurus_024532,Ailurus_024793,Ailurus_012778,Ailurus_019174,Ailurus_0…
GO:BP	cellular response to cytokine stimulus	GO:0071345	1e-05	0.00121684	106	1082	Ailurus_013776,Ailurus_022249,Ailurus_012892,Ailurus_021127,Ailurus_013994,Ailurus_023314,Ailurus_006185,Ailurus_010462,Ailurus_018196,Ailurus_008395,Ailurus_002607,Ailurus_012628,Ailurus_013956,Ailurus_000650,Ailurus_004409,Ailurus_004408,Ailurus_000288,Ailurus_022091,Ailurus_026694,Ailurus_017977,Ailurus_000035,Ailurus_005995,Ailurus_016870,Ailurus_005989,Ailurus_002668,Ailurus_000238,Ailurus_0…
GO:BP	positive regulation of cellular process	GO:0048522	1.1e-05	0.00131496	437	5745	Ailurus_023330,Ailurus_015700,Ailurus_015702,Ailurus_000685,Ailurus_000684,Ailurus_024896,Ailurus_023323,Ailurus_024898,Ailurus_026836,Ailurus_026834,Ailurus_010029,Ailurus_016805,Ailurus_023340,Ailurus_026849,Ailurus_003942,Ailurus_019084,Ailurus_002614,Ailurus_002610,Ailurus_022249,Ailurus_012652,Ailurus_010473,Ailurus_012892,Ailurus_020281,Ailurus_020276,Ailurus_002648,Ailurus_022214,Ailurus_0…
GO:BP	programmed cell death	GO:0012501	1.19e-05	0.0014046	186	2144	Ailurus_023330,Ailurus_000685,Ailurus_000684,Ailurus_023323,Ailurus_026836,Ailurus_023340,Ailurus_019084,Ailurus_002614,Ailurus_022249,Ailurus_010473,Ailurus_012892,Ailurus_022215,Ailurus_003970,Ailurus_024891,Ailurus_013994,Ailurus_023311,Ailurus_022227,Ailurus_006195,Ailurus_013960,Ailurus_020257,Ailurus_000409,Ailurus_006185,Ailurus_010462,Ailurus_018196,Ailurus_022205,Ailurus_013947,Ailurus_0…
GO:BP	response to tumor necrosis factor	GO:0034612	1.19e-05	0.00138301	36	259	Ailurus_022249,Ailurus_006185,Ailurus_008395,Ailurus_004409,Ailurus_004408,Ailurus_022091,Ailurus_005989,Ailurus_016827,Ailurus_009073,Ailurus_025533,Ailurus_004202,Ailurus_000081,Ailurus_006038,Ailurus_006037,Ailurus_019591,Ailurus_024942,Ailurus_008224,Ailurus_018689,Ailurus_014732,Ailurus_014730,Ailurus_022113,Ailurus_022373,Ailurus_009153,Ailurus_012737,Ailurus_012736,Ailurus_006081,Ailurus_0…
GO:BP	response to lipopolysaccharide	GO:0032496	1.29e-05	0.00146544	47	378	Ailurus_010029,Ailurus_022215,Ailurus_006185,Ailurus_010462,Ailurus_022091,Ailurus_000035,Ailurus_010085,Ailurus_016870,Ailurus_002668,Ailurus_025533,Ailurus_004612,Ailurus_017305,Ailurus_026214,Ailurus_006038,Ailurus_006037,Ailurus_019591,Ailurus_016078,Ailurus_010713,Ailurus_016016,Ailurus_018689,Ailurus_014732,Ailurus_014730,Ailurus_026959,Ailurus_024532,Ailurus_022373,Ailurus_000340,Ailurus_0…
GO:BP	regulation of cell communication	GO:0010646	1.39e-05	0.00156258	289	3591	Ailurus_000685,Ailurus_000684,Ailurus_024896,Ailurus_023323,Ailurus_024898,Ailurus_012449,Ailurus_026849,Ailurus_003942,Ailurus_022249,Ailurus_012652,Ailurus_010473,Ailurus_020276,Ailurus_022214,Ailurus_022215,Ailurus_003970,Ailurus_024891,Ailurus_009276,Ailurus_023318,Ailurus_022222,Ailurus_023311,Ailurus_022227,Ailurus_012631,Ailurus_013960,Ailurus_020014,Ailurus_000409,Ailurus_025957,Ailurus_0…
GO:BP	hematopoietic or lymphoid organ development	GO:0048534	1.66e-05	0.00183232	96	968	Ailurus_010029,Ailurus_016805,Ailurus_019084,Ailurus_010473,Ailurus_022215,Ailurus_009275,Ailurus_013994,Ailurus_012630,Ailurus_006195,Ailurus_013965,Ailurus_020257,Ailurus_025946,Ailurus_000409,Ailurus_018196,Ailurus_013947,Ailurus_002603,Ailurus_013956,Ailurus_004409,Ailurus_004408,Ailurus_015792,Ailurus_018828,Ailurus_000035,Ailurus_026883,Ailurus_009057,Ailurus_002655,Ailurus_000029,Ailurus_0…
GO:BP	transport	GO:0006810	1.75e-05	0.00191237	398	5189	Ailurus_023330,Ailurus_015700,Ailurus_008172,Ailurus_015702,Ailurus_010016,Ailurus_020053,Ailurus_026836,Ailurus_026834,Ailurus_010029,Ailurus_016805,Ailurus_013776,Ailurus_023339,Ailurus_026849,Ailurus_002615,Ailurus_019085,Ailurus_025756,Ailurus_019082,Ailurus_002610,Ailurus_022249,Ailurus_012894,Ailurus_012652,Ailurus_010473,Ailurus_012892,Ailurus_020281,Ailurus_020276,Ailurus_021365,Ailurus_0…
GO:BP	regulation of cell adhesion	GO:0030155	1.79e-05	0.00192261	75	710	Ailurus_016805,Ailurus_012652,Ailurus_022215,Ailurus_003970,Ailurus_023318,Ailurus_023314,Ailurus_006195,Ailurus_013960,Ailurus_010462,Ailurus_018196,Ailurus_013947,Ailurus_022650,Ailurus_025102,Ailurus_000288,Ailurus_026694,Ailurus_018825,Ailurus_005989,Ailurus_018658,Ailurus_027387,Ailurus_004202,Ailurus_006037,Ailurus_018018,Ailurus_008679,Ailurus_016078,Ailurus_021890,Ailurus_008650,Ailurus_0…
GO:BP	response to molecule of bacterial origin	GO:0002237	1.79e-05	0.00190021	48	394	Ailurus_010029,Ailurus_022215,Ailurus_006185,Ailurus_010462,Ailurus_022091,Ailurus_000035,Ailurus_010085,Ailurus_016870,Ailurus_002668,Ailurus_025533,Ailurus_004612,Ailurus_017305,Ailurus_026214,Ailurus_006038,Ailurus_006037,Ailurus_019591,Ailurus_016078,Ailurus_010713,Ailurus_016016,Ailurus_018689,Ailurus_014732,Ailurus_014730,Ailurus_026959,Ailurus_024532,Ailurus_022373,Ailurus_000340,Ailurus_0…
GO:BP	myeloid leukocyte differentiation	GO:0002573	1.8e-05	0.00187948	34	243	Ailurus_010029,Ailurus_019084,Ailurus_018196,Ailurus_013956,Ailurus_018828,Ailurus_000035,Ailurus_026883,Ailurus_009057,Ailurus_002655,Ailurus_025533,Ailurus_018658,Ailurus_027105,Ailurus_018486,Ailurus_014732,Ailurus_024793,Ailurus_022373,Ailurus_012778,Ailurus_000340,Ailurus_025825,Ailurus_024973,Ailurus_010559,Ailurus_006086,Ailurus_000188,Ailurus_000123,Ailurus_024105,Ailurus_000358,Ailurus_0…
GO:BP	defense response to protozoan	GO:0042832	1.89e-05	0.00195191	8	20	Ailurus_018825,Ailurus_004612,Ailurus_018633,Ailurus_008650,Ailurus_024532,Ailurus_010559,Ailurus_027096,Ailurus_018582,
GO:BP	reactive nitrogen species metabolic process	GO:2001057	1.92e-05	0.00195071	17	83	Ailurus_002610,Ailurus_010462,Ailurus_000288,Ailurus_018826,Ailurus_008846,Ailurus_004202,Ailurus_012728,Ailurus_021890,Ailurus_024532,Ailurus_000311,Ailurus_001674,Ailurus_000340,Ailurus_000309,Ailurus_025457,Ailurus_000147,Ailurus_006550,Ailurus_024186,
GO:BP	localization	GO:0051179	1.93e-05	0.00194031	497	6678	Ailurus_023330,Ailurus_015700,Ailurus_008172,Ailurus_015702,Ailurus_010016,Ailurus_020053,Ailurus_000685,Ailurus_000684,Ailurus_024898,Ailurus_026836,Ailurus_026834,Ailurus_010029,Ailurus_016805,Ailurus_013776,Ailurus_023339,Ailurus_026849,Ailurus_002615,Ailurus_003942,Ailurus_019085,Ailurus_002614,Ailurus_025756,Ailurus_019082,Ailurus_002610,Ailurus_022249,Ailurus_012894,Ailurus_012652,Ailurus_0…
GO:BP	regulation of programmed cell death	GO:0043067	2.11e-05	0.00208919	157	1771	Ailurus_023330,Ailurus_000685,Ailurus_000684,Ailurus_023323,Ailurus_026836,Ailurus_023340,Ailurus_002614,Ailurus_022249,Ailurus_010473,Ailurus_012892,Ailurus_022215,Ailurus_003970,Ailurus_024891,Ailurus_013994,Ailurus_022227,Ailurus_006195,Ailurus_013960,Ailurus_006185,Ailurus_010462,Ailurus_018196,Ailurus_022205,Ailurus_013947,Ailurus_008395,Ailurus_002609,Ailurus_001516,Ailurus_022650,Ailurus_0…
GO:BP	negative regulation of actin nucleation	GO:0051126	2.13e-05	0.00208394	5	7	Ailurus_023167,Ailurus_008685,Ailurus_008679,Ailurus_018698,Ailurus_026974,
GO:BP	regulation of cell population proliferation	GO:0042127	2.15e-05	0.00207664	160	1812	Ailurus_000685,Ailurus_000684,Ailurus_026836,Ailurus_016805,Ailurus_002614,Ailurus_012892,Ailurus_002648,Ailurus_022214,Ailurus_022215,Ailurus_003970,Ailurus_009275,Ailurus_013994,Ailurus_020051,Ailurus_023318,Ailurus_002639,Ailurus_021373,Ailurus_022226,Ailurus_022227,Ailurus_006195,Ailurus_013965,Ailurus_025946,Ailurus_000409,Ailurus_000643,Ailurus_006185,Ailurus_010462,Ailurus_025957,Ailurus_0…
GO:BP	positive regulation of reactive oxygen species biosynthetic process	GO:1903428	2.21e-05	0.00210493	14	60	Ailurus_002610,Ailurus_004409,Ailurus_004408,Ailurus_000288,Ailurus_004202,Ailurus_012728,Ailurus_021890,Ailurus_008402,Ailurus_000311,Ailurus_001674,Ailurus_000309,Ailurus_013493,Ailurus_000147,Ailurus_024186,
GO:BP	regulation of immune response	GO:0050776	2.34e-05	0.00220363	90	901	Ailurus_000685,Ailurus_000684,Ailurus_022251,Ailurus_002610,Ailurus_022249,Ailurus_012652,Ailurus_009276,Ailurus_020051,Ailurus_023318,Ailurus_014819,Ailurus_020014,Ailurus_000409,Ailurus_010462,Ailurus_018196,Ailurus_000660,Ailurus_000294,Ailurus_026694,Ailurus_010085,Ailurus_014686,Ailurus_018801,Ailurus_016870,Ailurus_005989,Ailurus_026883,Ailurus_002668,Ailurus_000238,Ailurus_026852,Ailurus_0…
GO:BP	response to oxygen-containing compound	GO:1901700	2.37e-05	0.00220248	171	1964	Ailurus_023330,Ailurus_000685,Ailurus_000684,Ailurus_010029,Ailurus_026849,Ailurus_019084,Ailurus_022249,Ailurus_022215,Ailurus_003970,Ailurus_013994,Ailurus_021373,Ailurus_023311,Ailurus_025946,Ailurus_006185,Ailurus_010462,Ailurus_025957,Ailurus_022682,Ailurus_018196,Ailurus_022205,Ailurus_003936,Ailurus_002603,Ailurus_000665,Ailurus_001990,Ailurus_020487,Ailurus_000288,Ailurus_004401,Ailurus_0…
GO:BP	regulation of apoptotic process	GO:0042981	2.48e-05	0.00227138	154	1736	Ailurus_000685,Ailurus_000684,Ailurus_023323,Ailurus_026836,Ailurus_023340,Ailurus_002614,Ailurus_022249,Ailurus_010473,Ailurus_012892,Ailurus_022215,Ailurus_003970,Ailurus_024891,Ailurus_013994,Ailurus_022227,Ailurus_006195,Ailurus_013960,Ailurus_006185,Ailurus_010462,Ailurus_018196,Ailurus_022205,Ailurus_013947,Ailurus_008395,Ailurus_002609,Ailurus_001516,Ailurus_022650,Ailurus_023754,Ailurus_0…
GO:BP	regulation of signaling	GO:0023051	2.52e-05	0.00228363	290	3632	Ailurus_000685,Ailurus_000684,Ailurus_024896,Ailurus_023323,Ailurus_024898,Ailurus_012449,Ailurus_026849,Ailurus_003942,Ailurus_022249,Ailurus_012652,Ailurus_010473,Ailurus_020276,Ailurus_022214,Ailurus_022215,Ailurus_003970,Ailurus_024891,Ailurus_009276,Ailurus_023318,Ailurus_022222,Ailurus_023311,Ailurus_022227,Ailurus_012631,Ailurus_013960,Ailurus_020014,Ailurus_000409,Ailurus_025957,Ailurus_0…
GO:BP	cell-cell adhesion involved in gastrulation	GO:0070586	2.55e-05	0.00228093	6	11	Ailurus_027387,Ailurus_016078,Ailurus_021890,Ailurus_024532,Ailurus_022308,Ailurus_018566,
GO:BP	leukocyte chemotaxis	GO:0030595	2.8e-05	0.00248093	30	207	Ailurus_002610,Ailurus_020051,Ailurus_002603,Ailurus_025102,Ailurus_017977,Ailurus_011152,Ailurus_026852,Ailurus_004620,Ailurus_014643,Ailurus_025533,Ailurus_004202,Ailurus_009528,Ailurus_008679,Ailurus_027177,Ailurus_024532,Ailurus_024793,Ailurus_022373,Ailurus_002754,Ailurus_024970,Ailurus_010329,Ailurus_025002,Ailurus_025458,Ailurus_000112,Ailurus_024105,Ailurus_005830,Ailurus_013030,Ailurus_0…
GO:BP	cellular response to tumor necrosis factor	GO:0071356	2.87e-05	0.00250699	33	238	Ailurus_022249,Ailurus_006185,Ailurus_008395,Ailurus_004409,Ailurus_004408,Ailurus_022091,Ailurus_005989,Ailurus_016827,Ailurus_009073,Ailurus_025533,Ailurus_004202,Ailurus_000081,Ailurus_006038,Ailurus_006037,Ailurus_019591,Ailurus_024942,Ailurus_008224,Ailurus_018689,Ailurus_014732,Ailurus_014730,Ailurus_022373,Ailurus_009153,Ailurus_012737,Ailurus_012736,Ailurus_006081,Ailurus_013493,Ailurus_0…
GO:BP	regulation of response to stress	GO:0080134	2.87e-05	0.0024795	133	1461	Ailurus_000685,Ailurus_000684,Ailurus_022251,Ailurus_022249,Ailurus_012652,Ailurus_020276,Ailurus_003970,Ailurus_009276,Ailurus_022227,Ailurus_014819,Ailurus_006195,Ailurus_020014,Ailurus_000409,Ailurus_006185,Ailurus_010462,Ailurus_018196,Ailurus_020480,Ailurus_008395,Ailurus_002609,Ailurus_002607,Ailurus_002603,Ailurus_023754,Ailurus_000294,Ailurus_025344,Ailurus_026694,Ailurus_000035,Ailurus_0…
GO:BP	hemopoiesis	GO:0030097	2.94e-05	0.00251404	91	919	Ailurus_010029,Ailurus_016805,Ailurus_019084,Ailurus_010473,Ailurus_022215,Ailurus_009275,Ailurus_013994,Ailurus_012630,Ailurus_013965,Ailurus_020257,Ailurus_025946,Ailurus_018196,Ailurus_013947,Ailurus_002603,Ailurus_013956,Ailurus_004409,Ailurus_004408,Ailurus_015792,Ailurus_018828,Ailurus_000035,Ailurus_026883,Ailurus_009057,Ailurus_002655,Ailurus_000029,Ailurus_020092,Ailurus_025533,Ailurus_0…
GO:BP	negative regulation of striated muscle cell differentiation	GO:0051154	3.25e-05	0.00274977	11	40	Ailurus_022215,Ailurus_025946,Ailurus_013947,Ailurus_004409,Ailurus_004408,Ailurus_022299,Ailurus_023809,Ailurus_004742,Ailurus_008752,Ailurus_017288,Ailurus_027042,
GO:BP	nitric oxide metabolic process	GO:0046209	3.28e-05	0.00274577	16	78	Ailurus_002610,Ailurus_010462,Ailurus_000288,Ailurus_008846,Ailurus_004202,Ailurus_012728,Ailurus_021890,Ailurus_024532,Ailurus_000311,Ailurus_001674,Ailurus_000340,Ailurus_000309,Ailurus_025457,Ailurus_000147,Ailurus_006550,Ailurus_024186,
GO:BP	establishment of localization	GO:0051234	3.66e-05	0.00302267	405	5331	Ailurus_023330,Ailurus_015700,Ailurus_008172,Ailurus_015702,Ailurus_010016,Ailurus_020053,Ailurus_026836,Ailurus_026834,Ailurus_010029,Ailurus_016805,Ailurus_013776,Ailurus_023339,Ailurus_026849,Ailurus_002615,Ailurus_019085,Ailurus_025756,Ailurus_019082,Ailurus_002610,Ailurus_022249,Ailurus_012894,Ailurus_012652,Ailurus_010473,Ailurus_012892,Ailurus_020281,Ailurus_020276,Ailurus_021365,Ailurus_0…
GO:BP	intracellular signal transduction	GO:0035556	3.83e-05	0.00313593	239	2925	Ailurus_000685,Ailurus_000684,Ailurus_023323,Ailurus_016805,Ailurus_022249,Ailurus_012652,Ailurus_012892,Ailurus_020276,Ailurus_022215,Ailurus_003970,Ailurus_024891,Ailurus_009276,Ailurus_023311,Ailurus_022227,Ailurus_006195,Ailurus_020014,Ailurus_000409,Ailurus_006185,Ailurus_018196,Ailurus_002609,Ailurus_001516,Ailurus_003936,Ailurus_022650,Ailurus_019010,Ailurus_002603,Ailurus_000665,Ailurus_0…
GO:BP	autophagy of mitochondrion	GO:0000422	3.87e-05	0.00313438	16	79	Ailurus_004401,Ailurus_018809,Ailurus_012223,Ailurus_008872,Ailurus_024942,Ailurus_019104,Ailurus_006236,Ailurus_023218,Ailurus_024973,Ailurus_000300,Ailurus_025277,Ailurus_002163,Ailurus_004583,Ailurus_016187,Ailurus_018108,Ailurus_027042,
GO:BP	mitochondrion disassembly	GO:0061726	3.87e-05	0.00313438	16	79	Ailurus_004401,Ailurus_018809,Ailurus_012223,Ailurus_008872,Ailurus_024942,Ailurus_019104,Ailurus_006236,Ailurus_023218,Ailurus_024973,Ailurus_000300,Ailurus_025277,Ailurus_002163,Ailurus_004583,Ailurus_016187,Ailurus_018108,Ailurus_027042,
GO:BP	regulation of viral entry into host cell	GO:0046596	3.92e-05	0.00310799	10	34	Ailurus_012630,Ailurus_012628,Ailurus_020002,Ailurus_027575,Ailurus_012778,Ailurus_001674,Ailurus_023896,Ailurus_025458,Ailurus_027099,Ailurus_021996,
GO:BP	regulation of actin filament polymerization	GO:0030833	4.11e-05	0.00322346	23	142	Ailurus_023167,Ailurus_000288,Ailurus_014686,Ailurus_016870,Ailurus_011399,Ailurus_015970,Ailurus_027126,Ailurus_027387,Ailurus_026243,Ailurus_004202,Ailurus_008685,Ailurus_008679,Ailurus_018698,Ailurus_024973,Ailurus_000772,Ailurus_026974,Ailurus_018783,Ailurus_016132,Ailurus_008750,Ailurus_015489,Ailurus_025043,Ailurus_026102,Ailurus_021996,
GO:BP	integrin-mediated signaling pathway	GO:0007229	4.48e-05	0.00347338	18	97	Ailurus_002610,Ailurus_021127,Ailurus_013960,Ailurus_018196,Ailurus_016870,Ailurus_026883,Ailurus_004202,Ailurus_018633,Ailurus_016279,Ailurus_024793,Ailurus_010119,Ailurus_009398,Ailurus_002754,Ailurus_024951,Ailurus_023026,Ailurus_023027,Ailurus_018151,Ailurus_007224,
GO:BP	cell population proliferation	GO:0008283	4.61e-05	0.00354219	193	2290	Ailurus_000685,Ailurus_000684,Ailurus_024896,Ailurus_024898,Ailurus_026836,Ailurus_016805,Ailurus_002614,Ailurus_002610,Ailurus_012892,Ailurus_002648,Ailurus_022214,Ailurus_022215,Ailurus_003970,Ailurus_009275,Ailurus_013994,Ailurus_020051,Ailurus_023318,Ailurus_002639,Ailurus_021373,Ailurus_023311,Ailurus_022226,Ailurus_022227,Ailurus_006195,Ailurus_013965,Ailurus_020257,Ailurus_025946,Ailurus_0…
GO:BP	positive regulation of cell death	GO:0010942	4.71e-05	0.00357805	81	805	Ailurus_023330,Ailurus_023323,Ailurus_023340,Ailurus_002614,Ailurus_022249,Ailurus_012892,Ailurus_022215,Ailurus_024891,Ailurus_013994,Ailurus_023311,Ailurus_022227,Ailurus_006185,Ailurus_018196,Ailurus_022205,Ailurus_008395,Ailurus_022650,Ailurus_002603,Ailurus_004409,Ailurus_004408,Ailurus_023167,Ailurus_024499,Ailurus_004401,Ailurus_026694,Ailurus_017977,Ailurus_002655,Ailurus_009082,Ailurus_0…
GO:BP	phagocytosis	GO:0006909	4.75e-05	0.00357621	33	244	Ailurus_010029,Ailurus_016805,Ailurus_002610,Ailurus_018196,Ailurus_000660,Ailurus_005995,Ailurus_016870,Ailurus_000031,Ailurus_000030,Ailurus_000029,Ailurus_004612,Ailurus_003172,Ailurus_026243,Ailurus_027328,Ailurus_023600,Ailurus_008679,Ailurus_024793,Ailurus_000311,Ailurus_020152,Ailurus_001674,Ailurus_024520,Ailurus_024522,Ailurus_025825,Ailurus_000309,Ailurus_000112,Ailurus_026161,Ailurus_0…
GO:BP	regulation of nitric oxide biosynthetic process	GO:0045428	4.78e-05	0.00356241	14	64	Ailurus_002610,Ailurus_010462,Ailurus_000288,Ailurus_004202,Ailurus_012728,Ailurus_021890,Ailurus_024532,Ailurus_000311,Ailurus_001674,Ailurus_000340,Ailurus_000309,Ailurus_000147,Ailurus_006550,Ailurus_024186,
GO:BP	biological adhesion	GO:0022610	4.98e-05	0.00367318	114	1228	Ailurus_016805,Ailurus_009010,Ailurus_002610,Ailurus_012652,Ailurus_010473,Ailurus_021127,Ailurus_021365,Ailurus_022215,Ailurus_003970,Ailurus_020051,Ailurus_023317,Ailurus_023318,Ailurus_023314,Ailurus_006195,Ailurus_013960,Ailurus_010462,Ailurus_022684,Ailurus_018196,Ailurus_013947,Ailurus_008395,Ailurus_022650,Ailurus_020002,Ailurus_000294,Ailurus_025102,Ailurus_000288,Ailurus_026694,Ailurus_0…
GO:BP	regulation of extrinsic apoptotic signaling pathway	GO:2001236	5.04e-05	0.00367967	26	173	Ailurus_000685,Ailurus_000684,Ailurus_023323,Ailurus_022249,Ailurus_003970,Ailurus_008395,Ailurus_000288,Ailurus_024499,Ailurus_026205,Ailurus_016827,Ailurus_018658,Ailurus_006038,Ailurus_018689,Ailurus_014732,Ailurus_012737,Ailurus_012736,Ailurus_010329,Ailurus_000120,Ailurus_004120,Ailurus_008750,Ailurus_026599,Ailurus_013030,Ailurus_023964,Ailurus_016187,Ailurus_021991,Ailurus_027044,
GO:BP	positive regulation of response to stimulus	GO:0048584	5.11e-05	0.00369778	193	2294	Ailurus_000685,Ailurus_000684,Ailurus_024896,Ailurus_023323,Ailurus_022251,Ailurus_002610,Ailurus_022249,Ailurus_012652,Ailurus_020276,Ailurus_022215,Ailurus_003970,Ailurus_023318,Ailurus_022227,Ailurus_014819,Ailurus_006195,Ailurus_013960,Ailurus_000409,Ailurus_010462,Ailurus_018196,Ailurus_013947,Ailurus_020480,Ailurus_008395,Ailurus_001516,Ailurus_022650,Ailurus_000660,Ailurus_002603,Ailurus_0…
GO:BP	regulation of reactive oxygen species biosynthetic process	GO:1903426	5.16e-05	0.00369647	18	98	Ailurus_002610,Ailurus_010462,Ailurus_004409,Ailurus_004408,Ailurus_000288,Ailurus_004202,Ailurus_012728,Ailurus_021890,Ailurus_008402,Ailurus_024532,Ailurus_000311,Ailurus_001674,Ailurus_000340,Ailurus_000309,Ailurus_013493,Ailurus_000147,Ailurus_006550,Ailurus_024186,
GO:BP	myeloid dendritic cell activation	GO:0001773	5.18e-05	0.00367473	10	35	Ailurus_019084,Ailurus_027105,Ailurus_018633,Ailurus_014732,Ailurus_024532,Ailurus_010559,Ailurus_000188,Ailurus_024318,Ailurus_008750,Ailurus_008921,
GO:BP	actin filament polymerization	GO:0030041	5.5e-05	0.00386713	25	164	Ailurus_023167,Ailurus_000288,Ailurus_014686,Ailurus_016870,Ailurus_011399,Ailurus_015970,Ailurus_027126,Ailurus_027387,Ailurus_026243,Ailurus_004202,Ailurus_008685,Ailurus_008679,Ailurus_008428,Ailurus_018698,Ailurus_024973,Ailurus_000772,Ailurus_026974,Ailurus_018783,Ailurus_016132,Ailurus_008750,Ailurus_015489,Ailurus_025043,Ailurus_026102,Ailurus_008343,Ailurus_021996,
GO:BP	autophagy	GO:0006914	5.79e-05	0.00403591	54	482	Ailurus_022222,Ailurus_004401,Ailurus_002698,Ailurus_018809,Ailurus_014686,Ailurus_012223,Ailurus_018666,Ailurus_003153,Ailurus_008872,Ailurus_018622,Ailurus_014026,Ailurus_008829,Ailurus_008212,Ailurus_012967,Ailurus_024942,Ailurus_009528,Ailurus_019104,Ailurus_006236,Ailurus_018679,Ailurus_018681,Ailurus_018680,Ailurus_008294,Ailurus_016925,Ailurus_023218,Ailurus_010119,Ailurus_011211,Ailurus_0…
GO:BP	process utilizing autophagic mechanism	GO:0061919	5.79e-05	0.00403591	54	482	Ailurus_022222,Ailurus_004401,Ailurus_002698,Ailurus_018809,Ailurus_014686,Ailurus_012223,Ailurus_018666,Ailurus_003153,Ailurus_008872,Ailurus_018622,Ailurus_014026,Ailurus_008829,Ailurus_008212,Ailurus_012967,Ailurus_024942,Ailurus_009528,Ailurus_019104,Ailurus_006236,Ailurus_018679,Ailurus_018681,Ailurus_018680,Ailurus_008294,Ailurus_016925,Ailurus_023218,Ailurus_010119,Ailurus_011211,Ailurus_0…
GO:BP	cell adhesion	GO:0007155	5.92e-05	0.00405127	113	1220	Ailurus_016805,Ailurus_009010,Ailurus_002610,Ailurus_012652,Ailurus_010473,Ailurus_021127,Ailurus_021365,Ailurus_022215,Ailurus_003970,Ailurus_020051,Ailurus_023317,Ailurus_023318,Ailurus_023314,Ailurus_006195,Ailurus_013960,Ailurus_010462,Ailurus_022684,Ailurus_018196,Ailurus_013947,Ailurus_008395,Ailurus_022650,Ailurus_020002,Ailurus_000294,Ailurus_025102,Ailurus_000288,Ailurus_026694,Ailurus_0…
GO:BP	regulation of reactive oxygen species metabolic process	GO:2000377	5.94e-05	0.0040252	29	205	Ailurus_002610,Ailurus_012892,Ailurus_010462,Ailurus_004409,Ailurus_004408,Ailurus_000288,Ailurus_004202,Ailurus_012728,Ailurus_000716,Ailurus_021890,Ailurus_008402,Ailurus_006250,Ailurus_018689,Ailurus_024532,Ailurus_000311,Ailurus_001674,Ailurus_000340,Ailurus_002754,Ailurus_000309,Ailurus_024961,Ailurus_013493,Ailurus_006948,Ailurus_000147,Ailurus_000140,Ailurus_026506,Ailurus_006550,Ailurus_0…
GO:BP	regulation of actin polymerization or depolymerization	GO:0008064	6.09e-05	0.00409187	25	165	Ailurus_023167,Ailurus_000288,Ailurus_014686,Ailurus_016870,Ailurus_011399,Ailurus_015970,Ailurus_027126,Ailurus_027387,Ailurus_026243,Ailurus_004202,Ailurus_008685,Ailurus_008679,Ailurus_018698,Ailurus_016279,Ailurus_024973,Ailurus_000772,Ailurus_018706,Ailurus_026974,Ailurus_018783,Ailurus_016132,Ailurus_008750,Ailurus_015489,Ailurus_025043,Ailurus_026102,Ailurus_021996,
GO:BP	signal transduction	GO:0007165	6.13e-05	0.00408284	432	5762	Ailurus_000685,Ailurus_000684,Ailurus_024896,Ailurus_023323,Ailurus_024411,Ailurus_024898,Ailurus_012449,Ailurus_016805,Ailurus_026849,Ailurus_003942,Ailurus_002610,Ailurus_022249,Ailurus_009049,Ailurus_012652,Ailurus_012892,Ailurus_021127,Ailurus_020276,Ailurus_002648,Ailurus_022214,Ailurus_022215,Ailurus_003970,Ailurus_024891,Ailurus_009276,Ailurus_013994,Ailurus_023318,Ailurus_021373,Ailurus_0…
GO:BP	nitric oxide biosynthetic process	GO:0006809	6.64e-05	0.00438453	15	74	Ailurus_002610,Ailurus_010462,Ailurus_000288,Ailurus_004202,Ailurus_012728,Ailurus_021890,Ailurus_024532,Ailurus_000311,Ailurus_001674,Ailurus_000340,Ailurus_000309,Ailurus_025457,Ailurus_000147,Ailurus_006550,Ailurus_024186,
GO:BP	regulation of nitric oxide metabolic process	GO:0080164	6.85e-05	0.00448271	14	66	Ailurus_002610,Ailurus_010462,Ailurus_000288,Ailurus_004202,Ailurus_012728,Ailurus_021890,Ailurus_024532,Ailurus_000311,Ailurus_001674,Ailurus_000340,Ailurus_000309,Ailurus_000147,Ailurus_006550,Ailurus_024186,
GO:BP	cell surface receptor signaling pathway	GO:0007166	6.91e-05	0.00448008	234	2880	Ailurus_000685,Ailurus_000684,Ailurus_024896,Ailurus_023323,Ailurus_012449,Ailurus_016805,Ailurus_003942,Ailurus_002610,Ailurus_022249,Ailurus_009049,Ailurus_012892,Ailurus_021127,Ailurus_022214,Ailurus_022215,Ailurus_003970,Ailurus_013994,Ailurus_023318,Ailurus_023311,Ailurus_014819,Ailurus_013960,Ailurus_006185,Ailurus_018196,Ailurus_013947,Ailurus_008395,Ailurus_003936,Ailurus_002602,Ailurus_0…
GO:BP	positive regulation of programmed cell death	GO:0043068	7e-05	0.00450159	76	752	Ailurus_023330,Ailurus_023323,Ailurus_023340,Ailurus_002614,Ailurus_022249,Ailurus_012892,Ailurus_022215,Ailurus_024891,Ailurus_013994,Ailurus_022227,Ailurus_006185,Ailurus_018196,Ailurus_022205,Ailurus_008395,Ailurus_022650,Ailurus_004409,Ailurus_004408,Ailurus_023167,Ailurus_024499,Ailurus_004401,Ailurus_026694,Ailurus_017977,Ailurus_002655,Ailurus_009082,Ailurus_016827,Ailurus_012223,Ailurus_0…
GO:BP	immune system development	GO:0002520	7.73e-05	0.00492822	98	1033	Ailurus_010029,Ailurus_016805,Ailurus_019084,Ailurus_010473,Ailurus_022215,Ailurus_009275,Ailurus_013994,Ailurus_012630,Ailurus_006195,Ailurus_013965,Ailurus_020257,Ailurus_025946,Ailurus_000409,Ailurus_018196,Ailurus_013947,Ailurus_002603,Ailurus_013956,Ailurus_004409,Ailurus_004408,Ailurus_015792,Ailurus_018828,Ailurus_000035,Ailurus_026883,Ailurus_009057,Ailurus_002655,Ailurus_000029,Ailurus_0…
GO:BP	positive regulation of reactive oxygen species metabolic process	GO:2000379	7.73e-05	0.00488938	19	110	Ailurus_002610,Ailurus_012892,Ailurus_004409,Ailurus_004408,Ailurus_000288,Ailurus_004202,Ailurus_012728,Ailurus_000716,Ailurus_021890,Ailurus_008402,Ailurus_018689,Ailurus_000311,Ailurus_001674,Ailurus_000309,Ailurus_013493,Ailurus_006948,Ailurus_000147,Ailurus_006550,Ailurus_024186,
GO:BP	histone deacetylation	GO:0016575	7.78e-05	0.00487934	18	101	Ailurus_002648,Ailurus_022227,Ailurus_025946,Ailurus_004409,Ailurus_004408,Ailurus_026271,Ailurus_006250,Ailurus_010119,Ailurus_006074,Ailurus_024956,Ailurus_024955,Ailurus_015665,Ailurus_015868,Ailurus_000126,Ailurus_025277,Ailurus_013030,Ailurus_001930,Ailurus_018567,
GO:BP	positive regulation of NF-kappaB transcription factor activity	GO:0051092	7.96e-05	0.0049514	23	148	Ailurus_002610,Ailurus_022249,Ailurus_000288,Ailurus_016827,Ailurus_017305,Ailurus_022373,Ailurus_010119,Ailurus_009153,Ailurus_023888,Ailurus_023896,Ailurus_012737,Ailurus_012736,Ailurus_000771,Ailurus_025002,Ailurus_025458,Ailurus_024105,Ailurus_000147,Ailurus_008750,Ailurus_025004,Ailurus_025003,Ailurus_016544,Ailurus_000609,Ailurus_021991,
GO:BP	regulation of tumor necrosis factor superfamily cytokine production	GO:1903555	8.12e-05	0.00500839	21	129	Ailurus_010462,Ailurus_018658,Ailurus_027177,Ailurus_016016,Ailurus_018689,Ailurus_014730,Ailurus_024532,Ailurus_024793,Ailurus_000340,Ailurus_025825,Ailurus_000771,Ailurus_025458,Ailurus_000111,Ailurus_024105,Ailurus_000147,Ailurus_006550,Ailurus_008750,Ailurus_025059,Ailurus_027096,Ailurus_000609,Ailurus_011924,
GO:BP	cell chemotaxis	GO:0060326	8.62e-05	0.00527441	35	273	Ailurus_002610,Ailurus_022215,Ailurus_020051,Ailurus_002603,Ailurus_025102,Ailurus_017977,Ailurus_011152,Ailurus_026852,Ailurus_004620,Ailurus_014643,Ailurus_025533,Ailurus_004202,Ailurus_009528,Ailurus_008679,Ailurus_027177,Ailurus_018689,Ailurus_018698,Ailurus_024532,Ailurus_024793,Ailurus_022373,Ailurus_010119,Ailurus_002754,Ailurus_024970,Ailurus_010329,Ailurus_025002,Ailurus_025458,Ailurus_0…
GO:BP	cellular defense response	GO:0006968	9.49e-05	0.00575679	12	52	Ailurus_023330,Ailurus_026883,Ailurus_004202,Ailurus_018625,Ailurus_008811,Ailurus_006038,Ailurus_018679,Ailurus_018681,Ailurus_018680,Ailurus_014315,Ailurus_007420,Ailurus_022623,
GO:BP	regulation of actin filament length	GO:0030832	9.99e-05	0.00601514	25	170	Ailurus_023167,Ailurus_000288,Ailurus_014686,Ailurus_016870,Ailurus_011399,Ailurus_015970,Ailurus_027126,Ailurus_027387,Ailurus_026243,Ailurus_004202,Ailurus_008685,Ailurus_008679,Ailurus_018698,Ailurus_016279,Ailurus_024973,Ailurus_000772,Ailurus_018706,Ailurus_026974,Ailurus_018783,Ailurus_016132,Ailurus_008750,Ailurus_015489,Ailurus_025043,Ailurus_026102,Ailurus_021996,
GO:BP	T cell activation	GO:0042110	0.000118	0.00701773	55	507	Ailurus_016805,Ailurus_013776,Ailurus_002610,Ailurus_020051,Ailurus_023318,Ailurus_010462,Ailurus_018196,Ailurus_015792,Ailurus_000288,Ailurus_018825,Ailurus_014686,Ailurus_005989,Ailurus_004612,Ailurus_018658,Ailurus_027105,Ailurus_018601,Ailurus_006038,Ailurus_006037,Ailurus_018018,Ailurus_008679,Ailurus_018485,Ailurus_008650,Ailurus_008672,Ailurus_024532,Ailurus_024793,Ailurus_012778,Ailurus_0…
GO:BP	reactive oxygen species biosynthetic process	GO:1903409	0.000121	0.00716582	20	123	Ailurus_002610,Ailurus_010462,Ailurus_004409,Ailurus_004408,Ailurus_000288,Ailurus_004202,Ailurus_008811,Ailurus_012728,Ailurus_021890,Ailurus_008402,Ailurus_024532,Ailurus_000311,Ailurus_001674,Ailurus_000340,Ailurus_000309,Ailurus_013493,Ailurus_025457,Ailurus_000147,Ailurus_006550,Ailurus_024186,
GO:BP	tumor necrosis factor superfamily cytokine production	GO:0071706	0.000127	0.00747979	21	133	Ailurus_010462,Ailurus_018658,Ailurus_027177,Ailurus_016016,Ailurus_018689,Ailurus_014730,Ailurus_024532,Ailurus_024793,Ailurus_000340,Ailurus_025825,Ailurus_000771,Ailurus_025458,Ailurus_000111,Ailurus_024105,Ailurus_000147,Ailurus_006550,Ailurus_008750,Ailurus_025059,Ailurus_027096,Ailurus_000609,Ailurus_011924,
GO:BP	leukocyte cell-cell adhesion	GO:0007159	0.000133	0.00776005	41	346	Ailurus_016805,Ailurus_002610,Ailurus_023318,Ailurus_013960,Ailurus_010462,Ailurus_018196,Ailurus_000288,Ailurus_018825,Ailurus_005989,Ailurus_018658,Ailurus_018018,Ailurus_022999,Ailurus_008679,Ailurus_021890,Ailurus_008650,Ailurus_018689,Ailurus_024532,Ailurus_012778,Ailurus_025825,Ailurus_024734,Ailurus_024956,Ailurus_024955,Ailurus_010329,Ailurus_006081,Ailurus_016753,Ailurus_025002,Ailurus_0…
GO:BP	cytokine-mediated signaling pathway	GO:0019221	0.000139	0.00807241	69	681	Ailurus_022249,Ailurus_012892,Ailurus_006185,Ailurus_018196,Ailurus_008395,Ailurus_012628,Ailurus_022091,Ailurus_026694,Ailurus_017977,Ailurus_016870,Ailurus_005989,Ailurus_002668,Ailurus_000029,Ailurus_004620,Ailurus_016827,Ailurus_012223,Ailurus_014643,Ailurus_025533,Ailurus_018658,Ailurus_017305,Ailurus_008865,Ailurus_018612,Ailurus_004202,Ailurus_000081,Ailurus_026214,Ailurus_006038,Ailurus_0…
GO:BP	negative regulation of tumor necrosis factor superfamily cytokine production	GO:1903556	0.00014	0.00803195	12	54	Ailurus_010462,Ailurus_027177,Ailurus_018689,Ailurus_024532,Ailurus_000340,Ailurus_025825,Ailurus_025458,Ailurus_000111,Ailurus_006550,Ailurus_025059,Ailurus_027096,Ailurus_000609,
GO:BP	leukocyte differentiation	GO:0002521	0.000141	0.00804461	61	583	Ailurus_010029,Ailurus_019084,Ailurus_025946,Ailurus_018196,Ailurus_013947,Ailurus_002603,Ailurus_013956,Ailurus_004409,Ailurus_004408,Ailurus_015792,Ailurus_018828,Ailurus_000035,Ailurus_026883,Ailurus_009057,Ailurus_002655,Ailurus_025533,Ailurus_018658,Ailurus_027105,Ailurus_004202,Ailurus_006037,Ailurus_008679,Ailurus_018485,Ailurus_018486,Ailurus_008650,Ailurus_008672,Ailurus_027148,Ailurus_0…
GO:BP	Ras protein signal transduction	GO:0007265	0.000142	0.00802101	37	302	Ailurus_012652,Ailurus_012892,Ailurus_020276,Ailurus_022215,Ailurus_024891,Ailurus_006195,Ailurus_018196,Ailurus_015970,Ailurus_012223,Ailurus_017310,Ailurus_008865,Ailurus_026244,Ailurus_026243,Ailurus_019107,Ailurus_010788,Ailurus_000947,Ailurus_023218,Ailurus_000311,Ailurus_026965,Ailurus_010119,Ailurus_000580,Ailurus_024985,Ailurus_011406,Ailurus_000309,Ailurus_000781,Ailurus_011897,Ailurus_0…
GO:BP	positive regulation of DNA-binding transcription factor activity	GO:0051091	0.000142	0.00797093	33	258	Ailurus_002610,Ailurus_022249,Ailurus_025946,Ailurus_012628,Ailurus_004409,Ailurus_004408,Ailurus_000288,Ailurus_016827,Ailurus_006427,Ailurus_017305,Ailurus_003172,Ailurus_024532,Ailurus_022373,Ailurus_010119,Ailurus_009153,Ailurus_023888,Ailurus_024984,Ailurus_023896,Ailurus_012737,Ailurus_012736,Ailurus_000771,Ailurus_025002,Ailurus_025458,Ailurus_024105,Ailurus_000147,Ailurus_025080,Ailurus_0…
GO:BP	leukocyte migration	GO:0050900	0.000146	0.0081487	46	405	Ailurus_016805,Ailurus_002610,Ailurus_020051,Ailurus_013960,Ailurus_018196,Ailurus_002603,Ailurus_025102,Ailurus_000288,Ailurus_017977,Ailurus_016870,Ailurus_011152,Ailurus_026852,Ailurus_004620,Ailurus_014643,Ailurus_025533,Ailurus_000011,Ailurus_026288,Ailurus_018658,Ailurus_004202,Ailurus_006037,Ailurus_022999,Ailurus_009528,Ailurus_008679,Ailurus_027177,Ailurus_024532,Ailurus_024793,Ailurus_0…
GO:BP	protein deacetylation	GO:0006476	0.000152	0.00839745	20	125	Ailurus_002648,Ailurus_022227,Ailurus_025946,Ailurus_004409,Ailurus_004408,Ailurus_026271,Ailurus_023191,Ailurus_023192,Ailurus_006250,Ailurus_010119,Ailurus_006074,Ailurus_024956,Ailurus_024955,Ailurus_015665,Ailurus_015868,Ailurus_000126,Ailurus_025277,Ailurus_013030,Ailurus_001930,Ailurus_018567,
GO:BP	positive regulation of apoptotic process	GO:0043065	0.00016	0.00877121	73	734	Ailurus_023323,Ailurus_023340,Ailurus_002614,Ailurus_022249,Ailurus_022215,Ailurus_024891,Ailurus_013994,Ailurus_022227,Ailurus_006185,Ailurus_018196,Ailurus_022205,Ailurus_008395,Ailurus_022650,Ailurus_004409,Ailurus_004408,Ailurus_023167,Ailurus_024499,Ailurus_004401,Ailurus_026694,Ailurus_017977,Ailurus_002655,Ailurus_009082,Ailurus_016827,Ailurus_012223,Ailurus_005586,Ailurus_018658,Ailurus_0…
GO:BP	regulation of myeloid cell differentiation	GO:0045637	0.000163	0.00888407	32	249	Ailurus_019084,Ailurus_009275,Ailurus_013994,Ailurus_013965,Ailurus_020257,Ailurus_013947,Ailurus_018828,Ailurus_026883,Ailurus_002655,Ailurus_020092,Ailurus_025533,Ailurus_018658,Ailurus_004202,Ailurus_014029,Ailurus_012778,Ailurus_019174,Ailurus_009153,Ailurus_025825,Ailurus_024973,Ailurus_012737,Ailurus_012736,Ailurus_010329,Ailurus_006086,Ailurus_013493,Ailurus_000123,Ailurus_024105,Ailurus_0…
GO:BP	adaptive immune response based on somatic recombination of immune receptors built from immunoglobulin superfamily domains	GO:0002460	0.000164	0.00890129	33	260	Ailurus_023330,Ailurus_013776,Ailurus_022249,Ailurus_023318,Ailurus_000409,Ailurus_000288,Ailurus_005989,Ailurus_004612,Ailurus_018658,Ailurus_027105,Ailurus_026470,Ailurus_008650,Ailurus_008672,Ailurus_016016,Ailurus_024532,Ailurus_024793,Ailurus_012778,Ailurus_024520,Ailurus_024522,Ailurus_024734,Ailurus_023888,Ailurus_010559,Ailurus_024956,Ailurus_024955,Ailurus_026161,Ailurus_006550,Ailurus_0…
GO:BP	regulation of tumor necrosis factor production	GO:0032680	0.00017	0.00911772	20	126	Ailurus_010462,Ailurus_018658,Ailurus_027177,Ailurus_016016,Ailurus_018689,Ailurus_014730,Ailurus_024532,Ailurus_024793,Ailurus_000340,Ailurus_025825,Ailurus_000771,Ailurus_025458,Ailurus_000111,Ailurus_000147,Ailurus_006550,Ailurus_008750,Ailurus_025059,Ailurus_027096,Ailurus_000609,Ailurus_011924,
GO:BP	modulation by symbiont of entry into host	GO:0052372	0.000178	0.00948317	10	40	Ailurus_012630,Ailurus_012628,Ailurus_020002,Ailurus_027575,Ailurus_012778,Ailurus_001674,Ailurus_023896,Ailurus_025458,Ailurus_027099,Ailurus_021996,
GO:BP	negative regulation of CD4-positive, alpha-beta T cell activation	GO:2000515	0.000182	0.00965886	9	33	Ailurus_023318,Ailurus_010462,Ailurus_008650,Ailurus_024734,Ailurus_024956,Ailurus_024955,Ailurus_025458,Ailurus_006550,Ailurus_001930,
GO:BP	negative regulation of cytokine production	GO:0001818	0.00019	0.0100032	34	273	Ailurus_023318,Ailurus_020014,Ailurus_010462,Ailurus_013947,Ailurus_023754,Ailurus_004612,Ailurus_027105,Ailurus_006038,Ailurus_024942,Ailurus_021890,Ailurus_027177,Ailurus_027148,Ailurus_018689,Ailurus_009144,Ailurus_014730,Ailurus_024532,Ailurus_000561,Ailurus_012778,Ailurus_000340,Ailurus_025825,Ailurus_024970,Ailurus_000771,Ailurus_016753,Ailurus_025458,Ailurus_015633,Ailurus_000111,Ailurus_0…
GO:BP	tumor necrosis factor production	GO:0032640	0.000211	0.0110256	20	128	Ailurus_010462,Ailurus_018658,Ailurus_027177,Ailurus_016016,Ailurus_018689,Ailurus_014730,Ailurus_024532,Ailurus_024793,Ailurus_000340,Ailurus_025825,Ailurus_000771,Ailurus_025458,Ailurus_000111,Ailurus_000147,Ailurus_006550,Ailurus_008750,Ailurus_025059,Ailurus_027096,Ailurus_000609,Ailurus_011924,
GO:BP	regulation of MAPK cascade	GO:0043408	0.000214	0.0110964	79	817	Ailurus_022249,Ailurus_020276,Ailurus_022215,Ailurus_003970,Ailurus_000409,Ailurus_018196,Ailurus_001516,Ailurus_023754,Ailurus_000288,Ailurus_000286,Ailurus_011397,Ailurus_002655,Ailurus_000031,Ailurus_000030,Ailurus_025533,Ailurus_005700,Ailurus_026283,Ailurus_017305,Ailurus_017324,Ailurus_004202,Ailurus_026498,Ailurus_004233,Ailurus_008811,Ailurus_010788,Ailurus_000716,Ailurus_024942,Ailurus_0…
GO:BP	negative regulation of heterotypic cell-cell adhesion	GO:0034115	0.000217	0.0111825	5	10	Ailurus_027387,Ailurus_016078,Ailurus_021890,Ailurus_024532,Ailurus_022308,
GO:BP	regulation of cell-cell adhesion involved in gastrulation	GO:0070587	0.000217	0.0111825	5	10	Ailurus_027387,Ailurus_016078,Ailurus_021890,Ailurus_024532,Ailurus_022308,
GO:BP	cellular response to oxygen-containing compound	GO:1901701	0.000221	0.0112334	118	1327	Ailurus_000685,Ailurus_000684,Ailurus_010029,Ailurus_019084,Ailurus_022249,Ailurus_013994,Ailurus_021373,Ailurus_023311,Ailurus_025946,Ailurus_006185,Ailurus_010462,Ailurus_022682,Ailurus_022205,Ailurus_003936,Ailurus_002603,Ailurus_000665,Ailurus_020487,Ailurus_000288,Ailurus_004401,Ailurus_022091,Ailurus_025121,Ailurus_026694,Ailurus_018826,Ailurus_018828,Ailurus_000035,Ailurus_010085,Ailurus_0…
GO:BP	negative regulation of alpha-beta T cell activation	GO:0046636	0.000222	0.0111868	10	41	Ailurus_023318,Ailurus_010462,Ailurus_008650,Ailurus_024734,Ailurus_024956,Ailurus_024955,Ailurus_025458,Ailurus_006550,Ailurus_001930,Ailurus_022623,
GO:BP	response to protozoan	GO:0001562	0.000222	0.0111381	8	27	Ailurus_018825,Ailurus_004612,Ailurus_018633,Ailurus_008650,Ailurus_024532,Ailurus_010559,Ailurus_027096,Ailurus_018582,
GO:BP	regulation of phagocytosis	GO:0050764	0.000225	0.0112085	16	91	Ailurus_016805,Ailurus_002610,Ailurus_016870,Ailurus_000031,Ailurus_000030,Ailurus_000029,Ailurus_004612,Ailurus_027328,Ailurus_024793,Ailurus_000311,Ailurus_001674,Ailurus_024520,Ailurus_024522,Ailurus_000309,Ailurus_008750,Ailurus_002163,
GO:BP	interferon-gamma production	GO:0032609	0.000226	0.0111944	19	119	Ailurus_004612,Ailurus_018658,Ailurus_008672,Ailurus_006492,Ailurus_016016,Ailurus_027148,Ailurus_024532,Ailurus_012778,Ailurus_025825,Ailurus_000771,Ailurus_016753,Ailurus_000188,Ailurus_025458,Ailurus_006550,Ailurus_008750,Ailurus_016544,Ailurus_027096,Ailurus_018582,Ailurus_011924,
GO:BP	regulation of intracellular signal transduction	GO:1902531	0.000233	0.0114527	167	1995	Ailurus_000685,Ailurus_000684,Ailurus_023323,Ailurus_022249,Ailurus_012652,Ailurus_020276,Ailurus_022215,Ailurus_003970,Ailurus_024891,Ailurus_009276,Ailurus_023311,Ailurus_022227,Ailurus_020014,Ailurus_000409,Ailurus_018196,Ailurus_002609,Ailurus_001516,Ailurus_019010,Ailurus_020487,Ailurus_023754,Ailurus_025344,Ailurus_000288,Ailurus_000286,Ailurus_017977,Ailurus_018801,Ailurus_002668,Ailurus_0…
GO:BP	regulation of histone deacetylation	GO:0031063	0.000234	0.0114223	9	34	Ailurus_002648,Ailurus_010119,Ailurus_006074,Ailurus_024956,Ailurus_024955,Ailurus_015868,Ailurus_025277,Ailurus_013030,Ailurus_001930,
GO:BP	signaling	GO:0023052	0.000237	0.0114918	460	6263	Ailurus_020053,Ailurus_000685,Ailurus_000684,Ailurus_024896,Ailurus_023323,Ailurus_024411,Ailurus_024898,Ailurus_026834,Ailurus_012449,Ailurus_016805,Ailurus_013776,Ailurus_026849,Ailurus_003942,Ailurus_002610,Ailurus_022249,Ailurus_009049,Ailurus_012652,Ailurus_010473,Ailurus_012892,Ailurus_020281,Ailurus_021127,Ailurus_020276,Ailurus_021365,Ailurus_002648,Ailurus_022214,Ailurus_022215,Ailurus_0…
GO:BP	positive regulation of signaling	GO:0023056	0.000241	0.0113814	159	1886	Ailurus_000685,Ailurus_000684,Ailurus_024896,Ailurus_023323,Ailurus_026849,Ailurus_022249,Ailurus_012652,Ailurus_020276,Ailurus_022215,Ailurus_003970,Ailurus_023318,Ailurus_022227,Ailurus_013960,Ailurus_000409,Ailurus_018196,Ailurus_013947,Ailurus_008395,Ailurus_001516,Ailurus_002603,Ailurus_020487,Ailurus_023754,Ailurus_025344,Ailurus_023167,Ailurus_000288,Ailurus_024499,Ailurus_000286,Ailurus_0…
GO:BP	cell communication	GO:0007154	0.000243	0.0114293	463	6310	Ailurus_020053,Ailurus_000685,Ailurus_000684,Ailurus_024896,Ailurus_023323,Ailurus_024411,Ailurus_024898,Ailurus_026834,Ailurus_012449,Ailurus_016805,Ailurus_013776,Ailurus_026849,Ailurus_003942,Ailurus_002610,Ailurus_022249,Ailurus_009049,Ailurus_012652,Ailurus_010473,Ailurus_012892,Ailurus_020281,Ailurus_021127,Ailurus_020276,Ailurus_021365,Ailurus_002648,Ailurus_022214,Ailurus_022215,Ailurus_0…
GO:BP	T cell activation involved in immune response	GO:0002286	0.00025	0.0116845	17	101	Ailurus_013776,Ailurus_000288,Ailurus_004612,Ailurus_027105,Ailurus_008650,Ailurus_008672,Ailurus_024793,Ailurus_025825,Ailurus_024734,Ailurus_010559,Ailurus_024956,Ailurus_024955,Ailurus_010329,Ailurus_025458,Ailurus_006550,Ailurus_027096,Ailurus_001930,
GO:BP	regulation of cell activation	GO:0050865	0.000261	0.0121	60	584	Ailurus_016805,Ailurus_002610,Ailurus_012892,Ailurus_023318,Ailurus_006195,Ailurus_000409,Ailurus_010462,Ailurus_018196,Ailurus_018825,Ailurus_005989,Ailurus_002668,Ailurus_000238,Ailurus_018658,Ailurus_022911,Ailurus_018633,Ailurus_006038,Ailurus_006037,Ailurus_018018,Ailurus_008679,Ailurus_008234,Ailurus_008650,Ailurus_008672,Ailurus_027148,Ailurus_016279,Ailurus_024532,Ailurus_024793,Ailurus_0…
GO:BP	negative regulation of cellular process	GO:0048523	0.000261	0.0120548	379	5055	Ailurus_000685,Ailurus_000684,Ailurus_023323,Ailurus_024898,Ailurus_026836,Ailurus_012449,Ailurus_016805,Ailurus_003942,Ailurus_019084,Ailurus_002614,Ailurus_022249,Ailurus_010473,Ailurus_012892,Ailurus_002648,Ailurus_022214,Ailurus_022215,Ailurus_003970,Ailurus_009276,Ailurus_009275,Ailurus_013994,Ailurus_023318,Ailurus_002639,Ailurus_021373,Ailurus_023311,Ailurus_023314,Ailurus_025978,Ailurus_0…
GO:BP	I-kappaB kinase/NF-kappaB signaling	GO:0007249	0.000265	0.0121438	29	223	Ailurus_022249,Ailurus_009276,Ailurus_020014,Ailurus_002668,Ailurus_016827,Ailurus_012223,Ailurus_018658,Ailurus_017305,Ailurus_027105,Ailurus_008224,Ailurus_018689,Ailurus_014732,Ailurus_014730,Ailurus_021265,Ailurus_010119,Ailurus_012778,Ailurus_024994,Ailurus_023888,Ailurus_023896,Ailurus_000771,Ailurus_006952,Ailurus_006953,Ailurus_000147,Ailurus_006550,Ailurus_008750,Ailurus_025003,Ailurus_0…
GO:BP	actin polymerization or depolymerization	GO:0008154	0.000272	0.0123491	27	202	Ailurus_023167,Ailurus_000288,Ailurus_014686,Ailurus_016870,Ailurus_011399,Ailurus_015970,Ailurus_027126,Ailurus_027387,Ailurus_026243,Ailurus_004202,Ailurus_008685,Ailurus_008679,Ailurus_008428,Ailurus_018698,Ailurus_016279,Ailurus_024973,Ailurus_000772,Ailurus_018706,Ailurus_026974,Ailurus_018783,Ailurus_016132,Ailurus_008750,Ailurus_015489,Ailurus_025043,Ailurus_026102,Ailurus_008343,Ailurus_0…
GO:BP	lymphocyte activation involved in immune response	GO:0002285	0.000273	0.0122812	25	181	Ailurus_013776,Ailurus_013947,Ailurus_000288,Ailurus_004612,Ailurus_027105,Ailurus_004202,Ailurus_026470,Ailurus_008679,Ailurus_008650,Ailurus_008672,Ailurus_027148,Ailurus_024532,Ailurus_024793,Ailurus_025825,Ailurus_024734,Ailurus_010559,Ailurus_024956,Ailurus_024955,Ailurus_010329,Ailurus_025458,Ailurus_026161,Ailurus_006550,Ailurus_015476,Ailurus_027096,Ailurus_001930,
GO:BP	negative regulation of response to stimulus	GO:0048585	0.00028	0.0125365	145	1700	Ailurus_000685,Ailurus_000684,Ailurus_023323,Ailurus_012449,Ailurus_003942,Ailurus_022249,Ailurus_022214,Ailurus_022215,Ailurus_003970,Ailurus_009276,Ailurus_023318,Ailurus_023311,Ailurus_014819,Ailurus_020014,Ailurus_006185,Ailurus_010462,Ailurus_018196,Ailurus_002609,Ailurus_002607,Ailurus_019010,Ailurus_020487,Ailurus_023754,Ailurus_025344,Ailurus_000288,Ailurus_000286,Ailurus_018801,Ailurus_0…
GO:BP	ERK1 and ERK2 cascade	GO:0070371	0.000284	0.0126506	38	324	Ailurus_022215,Ailurus_023754,Ailurus_000288,Ailurus_011397,Ailurus_002655,Ailurus_000031,Ailurus_000030,Ailurus_025533,Ailurus_005700,Ailurus_004202,Ailurus_004233,Ailurus_000716,Ailurus_021890,Ailurus_006250,Ailurus_018689,Ailurus_021268,Ailurus_021267,Ailurus_022373,Ailurus_012778,Ailurus_009398,Ailurus_009153,Ailurus_025825,Ailurus_024961,Ailurus_018701,Ailurus_025458,Ailurus_015622,Ailurus_0…
GO:BP	regulation of cytokine production	GO:0001817	0.000287	0.0127005	67	673	Ailurus_022249,Ailurus_012652,Ailurus_022213,Ailurus_023318,Ailurus_020014,Ailurus_000643,Ailurus_010462,Ailurus_013947,Ailurus_000650,Ailurus_023754,Ailurus_018825,Ailurus_011152,Ailurus_026852,Ailurus_014643,Ailurus_004612,Ailurus_018658,Ailurus_017305,Ailurus_027105,Ailurus_006038,Ailurus_024942,Ailurus_021890,Ailurus_027177,Ailurus_008650,Ailurus_023809,Ailurus_008672,Ailurus_016016,Ailurus_0…
GO:BP	positive regulation of supramolecular fiber organization	GO:1902905	0.000289	0.0127275	30	235	Ailurus_000685,Ailurus_000684,Ailurus_018196,Ailurus_022650,Ailurus_023167,Ailurus_000288,Ailurus_014686,Ailurus_016870,Ailurus_011399,Ailurus_015970,Ailurus_027126,Ailurus_026243,Ailurus_004202,Ailurus_008685,Ailurus_008679,Ailurus_018698,Ailurus_016279,Ailurus_000518,Ailurus_012737,Ailurus_012736,Ailurus_023026,Ailurus_023027,Ailurus_026974,Ailurus_018783,Ailurus_004358,Ailurus_008750,Ailurus_0…
GO:BP	regulation of striated muscle cell differentiation	GO:0051153	0.00029	0.0126696	20	131	Ailurus_012652,Ailurus_022215,Ailurus_003970,Ailurus_025946,Ailurus_013947,Ailurus_018810,Ailurus_018811,Ailurus_004409,Ailurus_004408,Ailurus_022299,Ailurus_017176,Ailurus_008650,Ailurus_023809,Ailurus_000194,Ailurus_004742,Ailurus_008752,Ailurus_025059,Ailurus_023977,Ailurus_017288,Ailurus_027042,
GO:BP	positive regulation of cell communication	GO:0010647	0.000292	0.012713	158	1880	Ailurus_000685,Ailurus_000684,Ailurus_024896,Ailurus_023323,Ailurus_026849,Ailurus_022249,Ailurus_012652,Ailurus_020276,Ailurus_022215,Ailurus_003970,Ailurus_023318,Ailurus_022227,Ailurus_013960,Ailurus_000409,Ailurus_018196,Ailurus_013947,Ailurus_008395,Ailurus_001516,Ailurus_002603,Ailurus_020487,Ailurus_023754,Ailurus_025344,Ailurus_023167,Ailurus_000288,Ailurus_024499,Ailurus_000286,Ailurus_0…
GO:BP	dendritic cell differentiation	GO:0097028	0.000297	0.0128338	9	35	Ailurus_019084,Ailurus_002603,Ailurus_027105,Ailurus_014732,Ailurus_010559,Ailurus_000188,Ailurus_025458,Ailurus_024318,Ailurus_017248,
GO:BP	negative regulation of GO:BP	GO:0048519	0.000297	0.0127741	410	5525	Ailurus_000685,Ailurus_000684,Ailurus_023323,Ailurus_024898,Ailurus_026836,Ailurus_012449,Ailurus_016805,Ailurus_003942,Ailurus_019084,Ailurus_002614,Ailurus_022249,Ailurus_010473,Ailurus_012892,Ailurus_002648,Ailurus_022214,Ailurus_022215,Ailurus_003970,Ailurus_009276,Ailurus_009275,Ailurus_013994,Ailurus_023318,Ailurus_002639,Ailurus_021373,Ailurus_022222,Ailurus_023311,Ailurus_023314,Ailurus_0…
GO:BP	negative regulation of response to external stimulus	GO:0032102	0.000303	0.0129467	40	348	Ailurus_000685,Ailurus_000684,Ailurus_022215,Ailurus_014819,Ailurus_020014,Ailurus_006185,Ailurus_010462,Ailurus_023754,Ailurus_001187,Ailurus_027328,Ailurus_006412,Ailurus_026214,Ailurus_005170,Ailurus_024942,Ailurus_008224,Ailurus_006040,Ailurus_021890,Ailurus_027177,Ailurus_027148,Ailurus_018689,Ailurus_018698,Ailurus_014730,Ailurus_024532,Ailurus_012778,Ailurus_000340,Ailurus_011400,Ailurus_0…
GO:BP	establishment of localization in cell	GO:0051649	0.00032	0.0135846	229	2880	Ailurus_015700,Ailurus_015702,Ailurus_020053,Ailurus_026834,Ailurus_016805,Ailurus_013776,Ailurus_023339,Ailurus_026849,Ailurus_019085,Ailurus_002610,Ailurus_012894,Ailurus_010473,Ailurus_012892,Ailurus_020281,Ailurus_020276,Ailurus_021365,Ailurus_002639,Ailurus_000643,Ailurus_006185,Ailurus_020269,Ailurus_025957,Ailurus_022682,Ailurus_018196,Ailurus_002609,Ailurus_002607,Ailurus_019010,Ailurus_0…
GO:BP	regulation of apoptotic signaling pathway	GO:2001233	0.000323	0.0136336	49	455	Ailurus_000685,Ailurus_000684,Ailurus_023323,Ailurus_022249,Ailurus_003970,Ailurus_022227,Ailurus_008395,Ailurus_002609,Ailurus_023167,Ailurus_025102,Ailurus_000288,Ailurus_024499,Ailurus_026205,Ailurus_016827,Ailurus_018658,Ailurus_008872,Ailurus_006038,Ailurus_000716,Ailurus_009528,Ailurus_008218,Ailurus_023809,Ailurus_008402,Ailurus_022931,Ailurus_018689,Ailurus_014732,Ailurus_012737,Ailurus_0…
GO:BP	adaptive immune response	GO:0002250	0.000323	0.0135765	35	292	Ailurus_023330,Ailurus_013776,Ailurus_022249,Ailurus_023318,Ailurus_000409,Ailurus_000288,Ailurus_005989,Ailurus_004612,Ailurus_018658,Ailurus_027105,Ailurus_026470,Ailurus_008650,Ailurus_008672,Ailurus_016016,Ailurus_024532,Ailurus_024793,Ailurus_022373,Ailurus_012778,Ailurus_024520,Ailurus_024522,Ailurus_024734,Ailurus_023888,Ailurus_010559,Ailurus_024956,Ailurus_024955,Ailurus_026161,Ailurus_0…
GO:BP	regulation of protein polymerization	GO:0032271	0.000327	0.01368	28	215	Ailurus_023167,Ailurus_000288,Ailurus_014686,Ailurus_016870,Ailurus_011399,Ailurus_015970,Ailurus_027126,Ailurus_027387,Ailurus_026243,Ailurus_004202,Ailurus_008685,Ailurus_008679,Ailurus_018698,Ailurus_024973,Ailurus_012737,Ailurus_012736,Ailurus_000772,Ailurus_000187,Ailurus_026306,Ailurus_026974,Ailurus_018783,Ailurus_016132,Ailurus_008750,Ailurus_015489,Ailurus_025043,Ailurus_026102,Ailurus_0…
GO:BP	germinal center formation	GO:0002467	0.000333	0.0138428	6	16	Ailurus_000409,Ailurus_005989,Ailurus_023888,Ailurus_026161,Ailurus_027096,Ailurus_001930,
GO:BP	negative regulation of interleukin-8 production	GO:0032717	0.000333	0.0138428	6	16	Ailurus_021890,Ailurus_024532,Ailurus_024970,Ailurus_000771,Ailurus_000111,Ailurus_027096,
GO:BP	regulation of multicellular organismal process	GO:0051239	0.000334	0.0137136	254	3240	Ailurus_020053,Ailurus_000685,Ailurus_000684,Ailurus_026836,Ailurus_026834,Ailurus_003942,Ailurus_019085,Ailurus_019084,Ailurus_002610,Ailurus_022249,Ailurus_012652,Ailurus_022213,Ailurus_022215,Ailurus_003970,Ailurus_009275,Ailurus_013994,Ailurus_023318,Ailurus_002639,Ailurus_006195,Ailurus_013960,Ailurus_013965,Ailurus_020257,Ailurus_025946,Ailurus_020014,Ailurus_000643,Ailurus_007039,Ailurus_0…
GO:BP	regulation of ERK1 and ERK2 cascade	GO:0070372	0.000338	0.0138063	36	304	Ailurus_022215,Ailurus_023754,Ailurus_000288,Ailurus_011397,Ailurus_002655,Ailurus_000031,Ailurus_000030,Ailurus_025533,Ailurus_004202,Ailurus_004233,Ailurus_000716,Ailurus_021890,Ailurus_006250,Ailurus_018689,Ailurus_021268,Ailurus_021267,Ailurus_022373,Ailurus_012778,Ailurus_009398,Ailurus_009153,Ailurus_025825,Ailurus_024961,Ailurus_018701,Ailurus_025458,Ailurus_015622,Ailurus_015633,Ailurus_0…
GO:BP	small GTPase mediated signal transduction	GO:0007264	0.000339	0.0138015	49	456	Ailurus_012652,Ailurus_012892,Ailurus_020276,Ailurus_022215,Ailurus_024891,Ailurus_006195,Ailurus_018196,Ailurus_016652,Ailurus_011155,Ailurus_000032,Ailurus_025772,Ailurus_015970,Ailurus_012223,Ailurus_005586,Ailurus_017310,Ailurus_008865,Ailurus_026244,Ailurus_026243,Ailurus_019107,Ailurus_010788,Ailurus_000947,Ailurus_008290,Ailurus_021263,Ailurus_023218,Ailurus_000311,Ailurus_026965,Ailurus_0…
GO:BP	positive regulation of signal transduction	GO:0009967	0.000342	0.0138296	144	1694	Ailurus_000685,Ailurus_000684,Ailurus_024896,Ailurus_023323,Ailurus_022249,Ailurus_012652,Ailurus_020276,Ailurus_022215,Ailurus_003970,Ailurus_023318,Ailurus_022227,Ailurus_013960,Ailurus_000409,Ailurus_018196,Ailurus_013947,Ailurus_008395,Ailurus_001516,Ailurus_023754,Ailurus_025344,Ailurus_023167,Ailurus_000288,Ailurus_024499,Ailurus_000286,Ailurus_017977,Ailurus_022076,Ailurus_002668,Ailurus_0…
GO:BP	granulocyte chemotaxis	GO:0071621	0.000358	0.0143909	17	104	Ailurus_002610,Ailurus_020051,Ailurus_011152,Ailurus_014643,Ailurus_025533,Ailurus_009528,Ailurus_027177,Ailurus_024793,Ailurus_002754,Ailurus_010329,Ailurus_025002,Ailurus_000112,Ailurus_013030,Ailurus_025004,Ailurus_025003,Ailurus_007268,Ailurus_007224,
GO:BP	regulation of supramolecular fiber organization	GO:1902903	0.000361	0.0144524	43	386	Ailurus_000685,Ailurus_000684,Ailurus_018196,Ailurus_022650,Ailurus_023167,Ailurus_000288,Ailurus_014686,Ailurus_016870,Ailurus_011399,Ailurus_015970,Ailurus_027126,Ailurus_027387,Ailurus_026243,Ailurus_004202,Ailurus_018269,Ailurus_008685,Ailurus_008679,Ailurus_018698,Ailurus_016279,Ailurus_009153,Ailurus_024973,Ailurus_000518,Ailurus_012737,Ailurus_012736,Ailurus_000772,Ailurus_018706,Ailurus_0…
GO:BP	positive regulation of immune system process	GO:0002684	0.000372	0.0148046	90	974	Ailurus_016805,Ailurus_022251,Ailurus_002610,Ailurus_022249,Ailurus_012652,Ailurus_012892,Ailurus_014819,Ailurus_018196,Ailurus_000660,Ailurus_000294,Ailurus_025102,Ailurus_000288,Ailurus_026694,Ailurus_018825,Ailurus_010085,Ailurus_016870,Ailurus_005989,Ailurus_002668,Ailurus_000238,Ailurus_026852,Ailurus_016827,Ailurus_025533,Ailurus_004612,Ailurus_018658,Ailurus_017305,Ailurus_027105,Ailurus_0…
GO:BP	positive regulation of protein deacetylation	GO:0090312	0.000373	0.0147791	9	36	Ailurus_002648,Ailurus_023191,Ailurus_023192,Ailurus_010119,Ailurus_024956,Ailurus_024955,Ailurus_025277,Ailurus_013030,Ailurus_001930,
GO:BP	negative regulation of tumor necrosis factor production	GO:0032720	0.000415	0.0163614	11	52	Ailurus_010462,Ailurus_027177,Ailurus_018689,Ailurus_024532,Ailurus_000340,Ailurus_025825,Ailurus_025458,Ailurus_000111,Ailurus_006550,Ailurus_025059,Ailurus_027096,
GO:BP	regulation of DNA-binding transcription factor activity	GO:0051090	0.000433	0.0169681	45	413	Ailurus_002610,Ailurus_022249,Ailurus_025946,Ailurus_012628,Ailurus_020487,Ailurus_004409,Ailurus_004408,Ailurus_000288,Ailurus_016870,Ailurus_016827,Ailurus_006427,Ailurus_017305,Ailurus_003172,Ailurus_006038,Ailurus_021890,Ailurus_026959,Ailurus_024532,Ailurus_022373,Ailurus_010119,Ailurus_009153,Ailurus_023888,Ailurus_024984,Ailurus_023896,Ailurus_012737,Ailurus_012736,Ailurus_000771,Ailurus_0…
GO:BP	protein deacylation	GO:0035601	0.000434	0.0169021	20	135	Ailurus_002648,Ailurus_022227,Ailurus_025946,Ailurus_004409,Ailurus_004408,Ailurus_026271,Ailurus_023191,Ailurus_023192,Ailurus_006250,Ailurus_010119,Ailurus_006074,Ailurus_024956,Ailurus_024955,Ailurus_015665,Ailurus_015868,Ailurus_000126,Ailurus_025277,Ailurus_013030,Ailurus_001930,Ailurus_018567,
GO:BP	regulation of cell shape	GO:0008360	0.000434	0.0169021	20	135	Ailurus_026836,Ailurus_002602,Ailurus_000288,Ailurus_016870,Ailurus_015970,Ailurus_025533,Ailurus_026243,Ailurus_004202,Ailurus_008679,Ailurus_021263,Ailurus_024994,Ailurus_011897,Ailurus_023026,Ailurus_023027,Ailurus_000120,Ailurus_021287,Ailurus_018783,Ailurus_026120,Ailurus_026102,Ailurus_013030,
GO:BP	response to drug	GO:0042493	0.000447	0.0172443	113	1284	Ailurus_023330,Ailurus_000685,Ailurus_000684,Ailurus_002615,Ailurus_019084,Ailurus_022249,Ailurus_022215,Ailurus_003970,Ailurus_021373,Ailurus_023311,Ailurus_025946,Ailurus_008369,Ailurus_010462,Ailurus_022682,Ailurus_022205,Ailurus_020480,Ailurus_003936,Ailurus_022650,Ailurus_002603,Ailurus_013956,Ailurus_001990,Ailurus_004409,Ailurus_004408,Ailurus_022091,Ailurus_025121,Ailurus_026694,Ailurus_0…
GO:BP	macromolecule deacylation	GO:0098732	0.000478	0.0183506	20	136	Ailurus_002648,Ailurus_022227,Ailurus_025946,Ailurus_004409,Ailurus_004408,Ailurus_026271,Ailurus_023191,Ailurus_023192,Ailurus_006250,Ailurus_010119,Ailurus_006074,Ailurus_024956,Ailurus_024955,Ailurus_015665,Ailurus_015868,Ailurus_000126,Ailurus_025277,Ailurus_013030,Ailurus_001930,Ailurus_018567,
GO:BP	regulation of GO:BP	GO:0050789	0.000479	0.0183057	749	10809	Ailurus_023330,Ailurus_015700,Ailurus_015702,Ailurus_020053,Ailurus_000685,Ailurus_000684,Ailurus_024896,Ailurus_023323,Ailurus_024411,Ailurus_024898,Ailurus_026836,Ailurus_026834,Ailurus_010029,Ailurus_012449,Ailurus_016805,Ailurus_022250,Ailurus_023340,Ailurus_022251,Ailurus_023339,Ailurus_026849,Ailurus_003942,Ailurus_019085,Ailurus_019084,Ailurus_002614,Ailurus_002610,Ailurus_022249,Ailurus_0…
GO:BP	negative regulation of myotube differentiation	GO:0010832	0.000487	0.0184892	6	17	Ailurus_022215,Ailurus_025946,Ailurus_004409,Ailurus_004408,Ailurus_023809,Ailurus_008752,
GO:BP	regulation of I-kappaB kinase/NF-kappaB signaling	GO:0043122	0.000488	0.0184592	25	188	Ailurus_022249,Ailurus_009276,Ailurus_020014,Ailurus_002668,Ailurus_016827,Ailurus_012223,Ailurus_018658,Ailurus_017305,Ailurus_008224,Ailurus_018689,Ailurus_014732,Ailurus_014730,Ailurus_021265,Ailurus_010119,Ailurus_012778,Ailurus_024994,Ailurus_023896,Ailurus_000771,Ailurus_006952,Ailurus_006953,Ailurus_000147,Ailurus_006550,Ailurus_008750,Ailurus_025003,Ailurus_000609,
GO:BP	negative regulation of gene expression	GO:0010629	0.000514	0.0193359	169	2056	Ailurus_024898,Ailurus_019084,Ailurus_012892,Ailurus_002648,Ailurus_022215,Ailurus_003970,Ailurus_013994,Ailurus_023318,Ailurus_025978,Ailurus_022227,Ailurus_020257,Ailurus_025946,Ailurus_020014,Ailurus_010462,Ailurus_022682,Ailurus_018196,Ailurus_022205,Ailurus_013947,Ailurus_003936,Ailurus_022650,Ailurus_020005,Ailurus_023754,Ailurus_004409,Ailurus_004408,Ailurus_025344,Ailurus_018826,Ailurus_0…
GO:BP	interleukin-6 production	GO:0032635	0.000526	0.019511	20	137	Ailurus_020014,Ailurus_024942,Ailurus_027177,Ailurus_016016,Ailurus_014730,Ailurus_024532,Ailurus_024793,Ailurus_024970,Ailurus_022308,Ailurus_000771,Ailurus_018709,Ailurus_000188,Ailurus_025457,Ailurus_025458,Ailurus_015868,Ailurus_000147,Ailurus_006550,Ailurus_008750,Ailurus_025059,Ailurus_016544,
GO:BP	mononuclear cell proliferation	GO:0032943	0.000535	0.0197405	35	300	Ailurus_002610,Ailurus_012892,Ailurus_023318,Ailurus_000409,Ailurus_010462,Ailurus_018825,Ailurus_014686,Ailurus_005989,Ailurus_004612,Ailurus_018658,Ailurus_018601,Ailurus_006038,Ailurus_018018,Ailurus_008679,Ailurus_008672,Ailurus_024532,Ailurus_012778,Ailurus_002754,Ailurus_019392,Ailurus_012976,Ailurus_024956,Ailurus_024955,Ailurus_010329,Ailurus_000771,Ailurus_016753,Ailurus_000188,Ailurus_0…
GO:BP	regulation of actin filament organization	GO:0110053	0.000536	0.0196876	32	266	Ailurus_018196,Ailurus_022650,Ailurus_023167,Ailurus_000288,Ailurus_014686,Ailurus_016870,Ailurus_011399,Ailurus_015970,Ailurus_027126,Ailurus_027387,Ailurus_026243,Ailurus_004202,Ailurus_008685,Ailurus_008679,Ailurus_018698,Ailurus_016279,Ailurus_024973,Ailurus_000772,Ailurus_018706,Ailurus_023026,Ailurus_023027,Ailurus_026974,Ailurus_018783,Ailurus_016132,Ailurus_004358,Ailurus_008750,Ailurus_0…
GO:BP	regulation of leukocyte activation	GO:0002694	0.000547	0.0199946	55	539	Ailurus_016805,Ailurus_002610,Ailurus_012892,Ailurus_023318,Ailurus_000409,Ailurus_010462,Ailurus_018196,Ailurus_018825,Ailurus_005989,Ailurus_002668,Ailurus_000238,Ailurus_018658,Ailurus_022911,Ailurus_018633,Ailurus_006038,Ailurus_006037,Ailurus_018018,Ailurus_008679,Ailurus_008650,Ailurus_008672,Ailurus_027148,Ailurus_024532,Ailurus_024793,Ailurus_012778,Ailurus_002754,Ailurus_025825,Ailurus_0…
GO:BP	regulation of interferon-gamma production	GO:0032649	0.000562	0.0204253	17	108	Ailurus_004612,Ailurus_018658,Ailurus_008672,Ailurus_016016,Ailurus_027148,Ailurus_024532,Ailurus_012778,Ailurus_025825,Ailurus_000771,Ailurus_016753,Ailurus_000188,Ailurus_025458,Ailurus_006550,Ailurus_008750,Ailurus_027096,Ailurus_018582,Ailurus_011924,
GO:BP	T-helper 1 type immune response	GO:0042088	0.000584	0.0211409	11	54	Ailurus_004612,Ailurus_027105,Ailurus_008650,Ailurus_008672,Ailurus_016016,Ailurus_012778,Ailurus_024734,Ailurus_013030,Ailurus_016544,Ailurus_027096,Ailurus_018582,
GO:BP	positive regulation of interleukin-8 production	GO:0032757	0.0006	0.0215831	10	46	Ailurus_000643,Ailurus_026852,Ailurus_018658,Ailurus_012737,Ailurus_012736,Ailurus_000771,Ailurus_025458,Ailurus_008750,Ailurus_024186,Ailurus_011924,
GO:BP	regulation of anatomical structure size	GO:0090066	0.000605	0.0216614	57	566	Ailurus_000685,Ailurus_000684,Ailurus_013994,Ailurus_008395,Ailurus_023167,Ailurus_000288,Ailurus_026694,Ailurus_014686,Ailurus_016870,Ailurus_011399,Ailurus_015970,Ailurus_022265,Ailurus_027126,Ailurus_027387,Ailurus_015135,Ailurus_026244,Ailurus_026243,Ailurus_004202,Ailurus_004200,Ailurus_008685,Ailurus_024946,Ailurus_008679,Ailurus_006236,Ailurus_018698,Ailurus_016279,Ailurus_023690,Ailurus_0…
GO:BP	negative regulation of interferon-beta production	GO:0032688	0.000611	0.0217953	5	12	Ailurus_020014,Ailurus_027105,Ailurus_000111,Ailurus_008750,Ailurus_004583,
GO:BP	positive regulation of histone deacetylation	GO:0031065	0.000614	0.0217849	7	24	Ailurus_002648,Ailurus_010119,Ailurus_024956,Ailurus_024955,Ailurus_025277,Ailurus_013030,Ailurus_001930,
GO:BP	cell migration	GO:0016477	0.000618	0.0218363	124	1444	Ailurus_000685,Ailurus_000684,Ailurus_016805,Ailurus_003942,Ailurus_002614,Ailurus_002610,Ailurus_022214,Ailurus_022215,Ailurus_020051,Ailurus_023311,Ailurus_006195,Ailurus_013960,Ailurus_025946,Ailurus_000409,Ailurus_018196,Ailurus_008395,Ailurus_022650,Ailurus_002603,Ailurus_004409,Ailurus_004408,Ailurus_025102,Ailurus_000288,Ailurus_026694,Ailurus_017977,Ailurus_014686,Ailurus_016870,Ailurus_0…
GO:BP	positive regulation of cell adhesion	GO:0045785	0.000619	0.0217492	47	444	Ailurus_016805,Ailurus_012652,Ailurus_003970,Ailurus_023314,Ailurus_006195,Ailurus_013960,Ailurus_018196,Ailurus_022650,Ailurus_025102,Ailurus_000288,Ailurus_018825,Ailurus_005989,Ailurus_018658,Ailurus_027387,Ailurus_004202,Ailurus_006037,Ailurus_018018,Ailurus_008679,Ailurus_008650,Ailurus_024532,Ailurus_000311,Ailurus_009153,Ailurus_025825,Ailurus_024734,Ailurus_024956,Ailurus_000309,Ailurus_0…
GO:BP	osteoclast differentiation	GO:0030316	0.000626	0.0219218	17	109	Ailurus_018828,Ailurus_000035,Ailurus_026883,Ailurus_009057,Ailurus_002655,Ailurus_025533,Ailurus_024793,Ailurus_022373,Ailurus_000340,Ailurus_000123,Ailurus_024105,Ailurus_000358,Ailurus_008921,Ailurus_000609,Ailurus_017297,Ailurus_007268,Ailurus_019679,
GO:BP	regulation of cellular process	GO:0050794	0.000645	0.0224796	716	10301	Ailurus_023330,Ailurus_015700,Ailurus_015702,Ailurus_020053,Ailurus_000685,Ailurus_000684,Ailurus_024896,Ailurus_023323,Ailurus_024411,Ailurus_024898,Ailurus_026836,Ailurus_026834,Ailurus_010029,Ailurus_012449,Ailurus_016805,Ailurus_022250,Ailurus_023340,Ailurus_023339,Ailurus_026849,Ailurus_003942,Ailurus_019085,Ailurus_019084,Ailurus_002614,Ailurus_002610,Ailurus_022249,Ailurus_009049,Ailurus_0…
GO:BP	leukocyte proliferation	GO:0070661	0.00066	0.0228868	36	315	Ailurus_002610,Ailurus_012892,Ailurus_023318,Ailurus_000409,Ailurus_010462,Ailurus_018825,Ailurus_014686,Ailurus_005989,Ailurus_004612,Ailurus_018658,Ailurus_018601,Ailurus_006038,Ailurus_018018,Ailurus_008679,Ailurus_008672,Ailurus_018689,Ailurus_024532,Ailurus_012778,Ailurus_002754,Ailurus_019392,Ailurus_012976,Ailurus_024956,Ailurus_024955,Ailurus_010329,Ailurus_000771,Ailurus_016753,Ailurus_0…
GO:BP	regulation of cell growth	GO:0001558	0.000667	0.0230168	50	482	Ailurus_026836,Ailurus_012892,Ailurus_003970,Ailurus_024891,Ailurus_018196,Ailurus_008395,Ailurus_022088,Ailurus_026205,Ailurus_022299,Ailurus_022265,Ailurus_026244,Ailurus_004202,Ailurus_014029,Ailurus_026214,Ailurus_024946,Ailurus_000735,Ailurus_001415,Ailurus_023218,Ailurus_000311,Ailurus_026965,Ailurus_009398,Ailurus_009153,Ailurus_008256,Ailurus_012737,Ailurus_012736,Ailurus_000309,Ailurus_0…
GO:BP	organelle disassembly	GO:1903008	0.000672	0.0230993	16	100	Ailurus_004401,Ailurus_018809,Ailurus_012223,Ailurus_008872,Ailurus_024942,Ailurus_019104,Ailurus_006236,Ailurus_023218,Ailurus_024973,Ailurus_000300,Ailurus_025277,Ailurus_002163,Ailurus_004583,Ailurus_016187,Ailurus_018108,Ailurus_027042,
GO:BP	T cell proliferation	GO:0042098	0.000684	0.0233793	27	214	Ailurus_002610,Ailurus_023318,Ailurus_010462,Ailurus_018825,Ailurus_014686,Ailurus_005989,Ailurus_004612,Ailurus_018658,Ailurus_018601,Ailurus_006038,Ailurus_018018,Ailurus_008679,Ailurus_008672,Ailurus_024532,Ailurus_012778,Ailurus_019392,Ailurus_012976,Ailurus_024956,Ailurus_024955,Ailurus_010329,Ailurus_016753,Ailurus_000188,Ailurus_025458,Ailurus_008750,Ailurus_023961,Ailurus_008758,Ailurus_0…
GO:BP	regulation of tumor necrosis factor-mediated signaling pathway	GO:0010803	0.000688	0.0234378	11	55	Ailurus_022249,Ailurus_016827,Ailurus_000081,Ailurus_008224,Ailurus_018689,Ailurus_014730,Ailurus_012737,Ailurus_012736,Ailurus_008750,Ailurus_026599,Ailurus_021991,
GO:BP	myeloid dendritic cell differentiation	GO:0043011	0.00069	0.0233872	6	18	Ailurus_019084,Ailurus_027105,Ailurus_014732,Ailurus_010559,Ailurus_000188,Ailurus_024318,
GO:BP	positive regulation of triglyceride biosynthetic process	GO:0010867	0.00069	0.0233872	6	18	Ailurus_008234,Ailurus_000140,Ailurus_019629,Ailurus_025277,Ailurus_023961,Ailurus_023964,
GO:BP	T-helper 2 cell differentiation	GO:0045064	0.00069	0.0233872	6	18	Ailurus_008650,Ailurus_025825,Ailurus_024734,Ailurus_010559,Ailurus_027096,Ailurus_001930,
GO:BP	negative regulation of viral entry into host cell	GO:0046597	0.00069	0.0233872	6	18	Ailurus_012630,Ailurus_012628,Ailurus_027575,Ailurus_001674,Ailurus_023896,Ailurus_021996,
GO:BP	regulation of hemopoiesis	GO:1903706	0.000711	0.0236713	48	459	Ailurus_019084,Ailurus_022215,Ailurus_009275,Ailurus_013994,Ailurus_013965,Ailurus_020257,Ailurus_013947,Ailurus_018828,Ailurus_026883,Ailurus_002655,Ailurus_020092,Ailurus_025533,Ailurus_018658,Ailurus_004202,Ailurus_014029,Ailurus_006037,Ailurus_008650,Ailurus_008672,Ailurus_027148,Ailurus_012778,Ailurus_019174,Ailurus_009153,Ailurus_025825,Ailurus_019392,Ailurus_024973,Ailurus_024734,Ailurus_0…
GO:BP	positive regulation of nitric oxide biosynthetic process	GO:0045429	0.000718	0.0237975	10	47	Ailurus_002610,Ailurus_000288,Ailurus_004202,Ailurus_012728,Ailurus_021890,Ailurus_000311,Ailurus_001674,Ailurus_000309,Ailurus_000147,Ailurus_024186,
GO:BP	negative regulation of transcription, DNA-templated	GO:0045892	0.000721	0.0237854	104	1180	Ailurus_024898,Ailurus_019084,Ailurus_002648,Ailurus_022215,Ailurus_003970,Ailurus_013994,Ailurus_025978,Ailurus_022227,Ailurus_020257,Ailurus_025946,Ailurus_022205,Ailurus_022650,Ailurus_020005,Ailurus_004409,Ailurus_004408,Ailurus_025344,Ailurus_018826,Ailurus_018828,Ailurus_000035,Ailurus_027521,Ailurus_012483,Ailurus_002663,Ailurus_012009,Ailurus_002655,Ailurus_021165,Ailurus_012223,Ailurus_0…
GO:BP	regulation of leukocyte proliferation	GO:0070663	0.000729	0.0239361	29	237	Ailurus_012892,Ailurus_023318,Ailurus_000409,Ailurus_010462,Ailurus_018825,Ailurus_005989,Ailurus_018658,Ailurus_006038,Ailurus_018018,Ailurus_008679,Ailurus_008672,Ailurus_018689,Ailurus_024532,Ailurus_012778,Ailurus_002754,Ailurus_019392,Ailurus_024956,Ailurus_024955,Ailurus_010329,Ailurus_000771,Ailurus_016753,Ailurus_000188,Ailurus_025458,Ailurus_000147,Ailurus_008750,Ailurus_023961,Ailurus_0…
GO:BP	positive regulation of innate immune response	GO:0045089	0.000769	0.0251635	30	249	Ailurus_012652,Ailurus_014819,Ailurus_000294,Ailurus_026694,Ailurus_016870,Ailurus_002668,Ailurus_026852,Ailurus_018658,Ailurus_017305,Ailurus_027105,Ailurus_027148,Ailurus_024793,Ailurus_012737,Ailurus_012736,Ailurus_000771,Ailurus_025002,Ailurus_025458,Ailurus_024105,Ailurus_000147,Ailurus_008750,Ailurus_024186,Ailurus_025004,Ailurus_005678,Ailurus_016544,Ailurus_027099,Ailurus_027093,Ailurus_0…
GO:BP	biological regulation	GO:0065007	0.00077	0.0250873	791	11517	Ailurus_023330,Ailurus_015700,Ailurus_015702,Ailurus_020057,Ailurus_020053,Ailurus_000685,Ailurus_000684,Ailurus_024896,Ailurus_023323,Ailurus_024411,Ailurus_024898,Ailurus_026836,Ailurus_026834,Ailurus_010029,Ailurus_012449,Ailurus_016805,Ailurus_022250,Ailurus_023340,Ailurus_022251,Ailurus_013776,Ailurus_023339,Ailurus_026849,Ailurus_003942,Ailurus_019085,Ailurus_019084,Ailurus_002614,Ailurus_0…
GO:BP	positive regulation of apoptotic signaling pathway	GO:2001235	0.00078	0.0252879	25	194	Ailurus_023323,Ailurus_022249,Ailurus_022227,Ailurus_008395,Ailurus_023167,Ailurus_024499,Ailurus_016827,Ailurus_018658,Ailurus_008872,Ailurus_008402,Ailurus_022931,Ailurus_014732,Ailurus_025002,Ailurus_026778,Ailurus_025458,Ailurus_000120,Ailurus_008750,Ailurus_026120,Ailurus_025039,Ailurus_025004,Ailurus_016187,Ailurus_022623,Ailurus_021996,Ailurus_027044,Ailurus_027042,
GO:BP	cellular response to lipopolysaccharide	GO:0071222	0.00078	0.0252879	25	194	Ailurus_010029,Ailurus_006185,Ailurus_010462,Ailurus_022091,Ailurus_000035,Ailurus_010085,Ailurus_016870,Ailurus_002668,Ailurus_025533,Ailurus_017305,Ailurus_016016,Ailurus_018689,Ailurus_026959,Ailurus_024532,Ailurus_025825,Ailurus_025457,Ailurus_000111,Ailurus_005830,Ailurus_000147,Ailurus_006550,Ailurus_008750,Ailurus_026113,Ailurus_000609,Ailurus_011924,Ailurus_025097,
GO:BP	chemokine production	GO:0032602	0.0008	0.0257322	15	92	Ailurus_010462,Ailurus_017977,Ailurus_026852,Ailurus_021890,Ailurus_008650,Ailurus_018689,Ailurus_024532,Ailurus_024970,Ailurus_022308,Ailurus_000771,Ailurus_025002,Ailurus_025458,Ailurus_000147,Ailurus_008750,Ailurus_025004,
GO:BP	wound healing	GO:0042060	0.000826	0.0264372	54	536	Ailurus_000685,Ailurus_000684,Ailurus_022215,Ailurus_003970,Ailurus_020051,Ailurus_006195,Ailurus_013960,Ailurus_013965,Ailurus_018196,Ailurus_008395,Ailurus_000665,Ailurus_018810,Ailurus_018811,Ailurus_000029,Ailurus_005706,Ailurus_004612,Ailurus_027112,Ailurus_008865,Ailurus_026272,Ailurus_000097,Ailurus_018633,Ailurus_018601,Ailurus_008210,Ailurus_019107,Ailurus_018698,Ailurus_016279,Ailurus_0…
GO:BP	positive regulation of stress-activated MAPK cascade	GO:0032874	0.000828	0.0264046	24	184	Ailurus_022249,Ailurus_020276,Ailurus_000409,Ailurus_018196,Ailurus_017305,Ailurus_004202,Ailurus_008811,Ailurus_016078,Ailurus_014732,Ailurus_022373,Ailurus_008275,Ailurus_000771,Ailurus_006948,Ailurus_004742,Ailurus_012102,Ailurus_006550,Ailurus_025080,Ailurus_008750,Ailurus_025049,Ailurus_004383,Ailurus_018770,Ailurus_013030,Ailurus_018582,Ailurus_019657,
GO:BP	positive regulation of MAPK cascade	GO:0043410	0.000848	0.0269289	57	574	Ailurus_022249,Ailurus_020276,Ailurus_022215,Ailurus_003970,Ailurus_000409,Ailurus_018196,Ailurus_001516,Ailurus_023754,Ailurus_000288,Ailurus_000286,Ailurus_002655,Ailurus_000031,Ailurus_000030,Ailurus_025533,Ailurus_005700,Ailurus_017305,Ailurus_017324,Ailurus_004202,Ailurus_008811,Ailurus_000716,Ailurus_016078,Ailurus_022931,Ailurus_014732,Ailurus_022373,Ailurus_012778,Ailurus_000580,Ailurus_0…
GO:BP	heterotypic cell-cell adhesion	GO:0034113	0.000855	0.0270306	10	48	Ailurus_002610,Ailurus_012652,Ailurus_013960,Ailurus_027387,Ailurus_016078,Ailurus_021890,Ailurus_024532,Ailurus_022308,Ailurus_008758,Ailurus_008756,
GO:BP	positive regulation of nitric oxide metabolic process	GO:1904407	0.000855	0.0270306	10	48	Ailurus_002610,Ailurus_000288,Ailurus_004202,Ailurus_012728,Ailurus_021890,Ailurus_000311,Ailurus_001674,Ailurus_000309,Ailurus_000147,Ailurus_024186,
GO:BP	actin cytoskeleton reorganization	GO:0031532	0.000859	0.0269381	17	112	Ailurus_018196,Ailurus_002603,Ailurus_000286,Ailurus_004401,Ailurus_016870,Ailurus_026243,Ailurus_004202,Ailurus_010788,Ailurus_016279,Ailurus_024973,Ailurus_024961,Ailurus_000120,Ailurus_025049,Ailurus_025004,Ailurus_018582,Ailurus_021996,Ailurus_019657,
GO:BP	granulocyte migration	GO:0097530	0.000864	0.0269633	18	122	Ailurus_002610,Ailurus_020051,Ailurus_011152,Ailurus_014643,Ailurus_025533,Ailurus_009528,Ailurus_027177,Ailurus_024793,Ailurus_002754,Ailurus_010329,Ailurus_025002,Ailurus_000112,Ailurus_024105,Ailurus_013030,Ailurus_025004,Ailurus_025003,Ailurus_007268,Ailurus_007224,
GO:BP	MAPK cascade	GO:0000165	0.00088	0.0273725	87	961	Ailurus_022249,Ailurus_020276,Ailurus_022215,Ailurus_003970,Ailurus_000409,Ailurus_018196,Ailurus_001516,Ailurus_023754,Ailurus_000288,Ailurus_000286,Ailurus_022076,Ailurus_002668,Ailurus_011397,Ailurus_002655,Ailurus_000031,Ailurus_000030,Ailurus_025533,Ailurus_004612,Ailurus_005700,Ailurus_026283,Ailurus_022911,Ailurus_017305,Ailurus_017324,Ailurus_004202,Ailurus_026498,Ailurus_004233,Ailurus_0…
GO:BP	acute inflammatory response	GO:0002526	0.000885	0.027393	21	153	Ailurus_022251,Ailurus_000288,Ailurus_026852,Ailurus_022911,Ailurus_016078,Ailurus_027177,Ailurus_022931,Ailurus_018689,Ailurus_023690,Ailurus_024793,Ailurus_022373,Ailurus_024520,Ailurus_024522,Ailurus_024970,Ailurus_011400,Ailurus_025002,Ailurus_024105,Ailurus_005830,Ailurus_026506,Ailurus_005462,Ailurus_018149,
GO:BP	lymphocyte proliferation	GO:0046651	0.000893	0.0275258	34	297	Ailurus_002610,Ailurus_012892,Ailurus_023318,Ailurus_000409,Ailurus_010462,Ailurus_018825,Ailurus_014686,Ailurus_005989,Ailurus_004612,Ailurus_018658,Ailurus_018601,Ailurus_006038,Ailurus_018018,Ailurus_008679,Ailurus_008672,Ailurus_024532,Ailurus_012778,Ailurus_002754,Ailurus_019392,Ailurus_012976,Ailurus_024956,Ailurus_024955,Ailurus_010329,Ailurus_000771,Ailurus_016753,Ailurus_000188,Ailurus_0…
GO:BP	positive regulation of stress-activated protein kinase signaling cascade	GO:0070304	0.000895	0.0274764	24	185	Ailurus_022249,Ailurus_020276,Ailurus_000409,Ailurus_018196,Ailurus_017305,Ailurus_004202,Ailurus_008811,Ailurus_016078,Ailurus_014732,Ailurus_022373,Ailurus_008275,Ailurus_000771,Ailurus_006948,Ailurus_004742,Ailurus_012102,Ailurus_006550,Ailurus_025080,Ailurus_008750,Ailurus_025049,Ailurus_004383,Ailurus_018770,Ailurus_013030,Ailurus_018582,Ailurus_019657,
GO:BP	regulation of mononuclear cell proliferation	GO:0032944	0.000902	0.0275977	28	229	Ailurus_012892,Ailurus_023318,Ailurus_000409,Ailurus_010462,Ailurus_018825,Ailurus_005989,Ailurus_018658,Ailurus_006038,Ailurus_018018,Ailurus_008679,Ailurus_008672,Ailurus_024532,Ailurus_012778,Ailurus_002754,Ailurus_019392,Ailurus_024956,Ailurus_024955,Ailurus_010329,Ailurus_000771,Ailurus_016753,Ailurus_000188,Ailurus_025458,Ailurus_000147,Ailurus_008750,Ailurus_023961,Ailurus_001930,Ailurus_0…
GO:BP	regulation of lymphocyte activation	GO:0051249	0.000908	0.0276487	47	452	Ailurus_016805,Ailurus_012892,Ailurus_023318,Ailurus_000409,Ailurus_010462,Ailurus_018196,Ailurus_018825,Ailurus_005989,Ailurus_002668,Ailurus_018658,Ailurus_022911,Ailurus_006038,Ailurus_006037,Ailurus_018018,Ailurus_008679,Ailurus_008650,Ailurus_008672,Ailurus_027148,Ailurus_024532,Ailurus_012778,Ailurus_002754,Ailurus_025825,Ailurus_019392,Ailurus_024734,Ailurus_024956,Ailurus_024955,Ailurus_0…
GO:BP	regulation of pseudopodium assembly	GO:0031272	0.00094	0.0285313	5	13	Ailurus_018196,Ailurus_014686,Ailurus_015970,Ailurus_018783,Ailurus_026102,
GO:BP	positive regulation of pseudopodium assembly	GO:0031274	0.00094	0.0285313	5	13	Ailurus_018196,Ailurus_014686,Ailurus_015970,Ailurus_018783,Ailurus_026102,
GO:BP	positive regulation of extrinsic apoptotic signaling pathway	GO:2001238	0.000943	0.028375	11	57	Ailurus_023323,Ailurus_022249,Ailurus_008395,Ailurus_024499,Ailurus_016827,Ailurus_018658,Ailurus_014732,Ailurus_000120,Ailurus_008750,Ailurus_016187,Ailurus_027044,
GO:BP	regulation of heterotypic cell-cell adhesion	GO:0034114	0.000954	0.0285862	6	19	Ailurus_012652,Ailurus_027387,Ailurus_016078,Ailurus_021890,Ailurus_024532,Ailurus_022308,
GO:BP	negative regulation of T-helper cell differentiation	GO:0045623	0.000954	0.0285862	6	19	Ailurus_008650,Ailurus_024734,Ailurus_024956,Ailurus_024955,Ailurus_006550,Ailurus_001930,
GO:BP	T cell differentiation involved in immune response	GO:0002292	0.000976	0.0290349	13	75	Ailurus_027105,Ailurus_008650,Ailurus_008672,Ailurus_024793,Ailurus_025825,Ailurus_024734,Ailurus_010559,Ailurus_024956,Ailurus_024955,Ailurus_025458,Ailurus_006550,Ailurus_027096,Ailurus_001930,
GO:BP	cell-substrate adhesion	GO:0031589	0.00101093	0.0299459	38	346	Ailurus_016805,Ailurus_009010,Ailurus_002610,Ailurus_010473,Ailurus_021127,Ailurus_022215,Ailurus_023314,Ailurus_006195,Ailurus_013960,Ailurus_018196,Ailurus_008395,Ailurus_022650,Ailurus_027387,Ailurus_004202,Ailurus_008679,Ailurus_008888,Ailurus_000311,Ailurus_009153,Ailurus_002754,Ailurus_000309,Ailurus_024951,Ailurus_011899,Ailurus_023026,Ailurus_023027,Ailurus_026306,Ailurus_000120,Ailurus_0…
GO:BP	positive regulation of cell activation	GO:0050867	0.00101884	0.0300618	39	358	Ailurus_016805,Ailurus_002610,Ailurus_012892,Ailurus_006195,Ailurus_018196,Ailurus_018825,Ailurus_005989,Ailurus_002668,Ailurus_000238,Ailurus_018658,Ailurus_006038,Ailurus_018018,Ailurus_008679,Ailurus_008234,Ailurus_008650,Ailurus_016279,Ailurus_024532,Ailurus_024793,Ailurus_002754,Ailurus_025825,Ailurus_024734,Ailurus_024956,Ailurus_024955,Ailurus_006081,Ailurus_000771,Ailurus_000188,Ailurus_0…
GO:BP	negative regulation of transport	GO:0051051	0.00102245	0.0300506	56	566	Ailurus_022215,Ailurus_003970,Ailurus_006185,Ailurus_010462,Ailurus_002607,Ailurus_020005,Ailurus_020487,Ailurus_023754,Ailurus_000288,Ailurus_000039,Ailurus_000037,Ailurus_016814,Ailurus_000029,Ailurus_002681,Ailurus_016007,Ailurus_018639,Ailurus_017305,Ailurus_008865,Ailurus_016225,Ailurus_004202,Ailurus_027328,Ailurus_000077,Ailurus_006038,Ailurus_019116,Ailurus_000716,Ailurus_008679,Ailurus_0…
GO:BP	positive regulation of actin filament polymerization	GO:0030838	0.00104003	0.0302132	16	104	Ailurus_023167,Ailurus_000288,Ailurus_014686,Ailurus_016870,Ailurus_015970,Ailurus_027126,Ailurus_026243,Ailurus_004202,Ailurus_008685,Ailurus_008679,Ailurus_018698,Ailurus_026974,Ailurus_018783,Ailurus_008750,Ailurus_026102,Ailurus_021996,
GO:BP	negative regulation of muscle cell differentiation	GO:0051148	0.00109653	0.0317318	11	58	Ailurus_022215,Ailurus_025946,Ailurus_013947,Ailurus_004409,Ailurus_004408,Ailurus_022299,Ailurus_023809,Ailurus_004742,Ailurus_008752,Ailurus_017288,Ailurus_027042,
GO:BP	regulation of protein deacetylation	GO:0090311	0.00109653	0.0317318	11	58	Ailurus_002648,Ailurus_023191,Ailurus_023192,Ailurus_010119,Ailurus_006074,Ailurus_024956,Ailurus_024955,Ailurus_015868,Ailurus_025277,Ailurus_013030,Ailurus_001930,
GO:BP	negative regulation of transcription by RNA polymerase II	GO:0000122	0.00110486	0.0317288	78	850	Ailurus_024898,Ailurus_019084,Ailurus_002648,Ailurus_022215,Ailurus_013994,Ailurus_025978,Ailurus_022227,Ailurus_020257,Ailurus_025946,Ailurus_022205,Ailurus_020005,Ailurus_004409,Ailurus_004408,Ailurus_025344,Ailurus_018828,Ailurus_027521,Ailurus_012483,Ailurus_002663,Ailurus_002655,Ailurus_021165,Ailurus_012223,Ailurus_020092,Ailurus_027142,Ailurus_027143,Ailurus_007747,Ailurus_027107,Ailurus_0…
GO:BP	regulation of cell-cell adhesion	GO:0022407	0.00112283	0.0321224	44	420	Ailurus_016805,Ailurus_012652,Ailurus_023318,Ailurus_006195,Ailurus_010462,Ailurus_018196,Ailurus_000288,Ailurus_018825,Ailurus_005989,Ailurus_018658,Ailurus_027387,Ailurus_018018,Ailurus_008679,Ailurus_016078,Ailurus_021890,Ailurus_008650,Ailurus_018689,Ailurus_024532,Ailurus_012778,Ailurus_025825,Ailurus_024734,Ailurus_024956,Ailurus_024955,Ailurus_010329,Ailurus_006081,Ailurus_022308,Ailurus_0…
GO:BP	negative regulation of cell adhesion	GO:0007162	0.00113771	0.0324246	32	278	Ailurus_022215,Ailurus_023318,Ailurus_010462,Ailurus_026694,Ailurus_027387,Ailurus_016078,Ailurus_021890,Ailurus_008650,Ailurus_018689,Ailurus_024532,Ailurus_012778,Ailurus_000340,Ailurus_024734,Ailurus_024956,Ailurus_024951,Ailurus_024955,Ailurus_010329,Ailurus_022308,Ailurus_016753,Ailurus_004537,Ailurus_025458,Ailurus_026306,Ailurus_015633,Ailurus_024105,Ailurus_021287,Ailurus_004742,Ailurus_0…
GO:BP	endothelial cell differentiation	GO:0045446	0.00115483	0.0327883	16	105	Ailurus_000685,Ailurus_000684,Ailurus_002614,Ailurus_022215,Ailurus_003970,Ailurus_006195,Ailurus_013947,Ailurus_001516,Ailurus_000288,Ailurus_000286,Ailurus_025121,Ailurus_027387,Ailurus_022703,Ailurus_014730,Ailurus_012763,Ailurus_013030,
GO:BP	negative regulation of hemopoiesis	GO:1903707	0.00118913	0.0336353	20	146	Ailurus_022215,Ailurus_009275,Ailurus_013947,Ailurus_020092,Ailurus_025533,Ailurus_004202,Ailurus_008650,Ailurus_027148,Ailurus_019174,Ailurus_009153,Ailurus_025825,Ailurus_024734,Ailurus_024956,Ailurus_024955,Ailurus_006086,Ailurus_006550,Ailurus_008921,Ailurus_000609,Ailurus_001930,Ailurus_017248,
GO:BP	protein polymerization	GO:0051258	0.00123742	0.0348702	33	291	Ailurus_023167,Ailurus_000288,Ailurus_014686,Ailurus_016870,Ailurus_011399,Ailurus_015970,Ailurus_027126,Ailurus_027387,Ailurus_026243,Ailurus_004202,Ailurus_018269,Ailurus_008685,Ailurus_008679,Ailurus_008428,Ailurus_018698,Ailurus_000311,Ailurus_024973,Ailurus_012737,Ailurus_012736,Ailurus_000309,Ailurus_000772,Ailurus_000187,Ailurus_026306,Ailurus_026974,Ailurus_018783,Ailurus_016132,Ailurus_0…
GO:BP	regulation of mitochondrial membrane permeability	GO:0046902	0.001257	0.0352898	13	77	Ailurus_023167,Ailurus_025102,Ailurus_022088,Ailurus_008402,Ailurus_008290,Ailurus_012737,Ailurus_012736,Ailurus_026778,Ailurus_015848,Ailurus_027833,Ailurus_026599,Ailurus_006391,Ailurus_027042,
GO:BP	CD4-positive, alpha-beta T cell differentiation involved in immune response	GO:0002294	0.00128542	0.0359536	12	68	Ailurus_027105,Ailurus_008650,Ailurus_008672,Ailurus_025825,Ailurus_024734,Ailurus_010559,Ailurus_024956,Ailurus_024955,Ailurus_025458,Ailurus_006550,Ailurus_027096,Ailurus_001930,
GO:BP	viral entry into host cell	GO:0046718	0.00128542	0.0359536	12	68	Ailurus_012630,Ailurus_012628,Ailurus_020002,Ailurus_027575,Ailurus_012778,Ailurus_001674,Ailurus_023896,Ailurus_018709,Ailurus_025458,Ailurus_009812,Ailurus_027099,Ailurus_021996,
GO:BP	regulation of water loss via skin	GO:0033561	0.00128827	0.0357673	6	20	Ailurus_020057,Ailurus_002639,Ailurus_025133,Ailurus_008822,Ailurus_024942,Ailurus_006334,
GO:BP	histone H3 deacetylation	GO:0070932	0.00128827	0.0357673	6	20	Ailurus_004409,Ailurus_004408,Ailurus_026271,Ailurus_006250,Ailurus_000126,Ailurus_018567,
GO:BP	positive regulation of intracellular signal transduction	GO:1902533	0.00129369	0.0356547	98	1120	Ailurus_000685,Ailurus_000684,Ailurus_023323,Ailurus_022249,Ailurus_020276,Ailurus_022215,Ailurus_003970,Ailurus_022227,Ailurus_000409,Ailurus_018196,Ailurus_001516,Ailurus_023754,Ailurus_025344,Ailurus_000288,Ailurus_000286,Ailurus_017977,Ailurus_002668,Ailurus_002655,Ailurus_000031,Ailurus_000030,Ailurus_016827,Ailurus_025533,Ailurus_005700,Ailurus_018658,Ailurus_008872,Ailurus_017305,Ailurus_0…
GO:BP	actin cytoskeleton organization	GO:0030036	0.00129703	0.0356162	67	712	Ailurus_016805,Ailurus_019085,Ailurus_010473,Ailurus_021127,Ailurus_024891,Ailurus_009460,Ailurus_018196,Ailurus_022650,Ailurus_002603,Ailurus_023167,Ailurus_000288,Ailurus_000286,Ailurus_004401,Ailurus_014686,Ailurus_016870,Ailurus_011399,Ailurus_001329,Ailurus_015970,Ailurus_027126,Ailurus_027387,Ailurus_008865,Ailurus_008861,Ailurus_026243,Ailurus_018615,Ailurus_004202,Ailurus_025374,Ailurus_0…
GO:BP	cellular response to molecule of bacterial origin	GO:0071219	0.00130157	0.035611	25	201	Ailurus_010029,Ailurus_006185,Ailurus_010462,Ailurus_022091,Ailurus_000035,Ailurus_010085,Ailurus_016870,Ailurus_002668,Ailurus_025533,Ailurus_017305,Ailurus_016016,Ailurus_018689,Ailurus_026959,Ailurus_024532,Ailurus_025825,Ailurus_025457,Ailurus_000111,Ailurus_005830,Ailurus_000147,Ailurus_006550,Ailurus_008750,Ailurus_026113,Ailurus_000609,Ailurus_011924,Ailurus_025097,
GO:BP	cell-cell adhesion	GO:0098609	0.00134913	0.0367783	68	726	Ailurus_016805,Ailurus_002610,Ailurus_012652,Ailurus_020051,Ailurus_023317,Ailurus_023318,Ailurus_006195,Ailurus_013960,Ailurus_010462,Ailurus_022684,Ailurus_018196,Ailurus_020002,Ailurus_000288,Ailurus_018825,Ailurus_005989,Ailurus_018658,Ailurus_027387,Ailurus_018633,Ailurus_008822,Ailurus_008210,Ailurus_018018,Ailurus_022999,Ailurus_008679,Ailurus_016078,Ailurus_021890,Ailurus_008650,Ailurus_0…
GO:BP	actin filament-based process	GO:0030029	0.00135261	0.0367403	76	830	Ailurus_020053,Ailurus_026834,Ailurus_016805,Ailurus_019085,Ailurus_010473,Ailurus_021127,Ailurus_024891,Ailurus_006195,Ailurus_009460,Ailurus_018196,Ailurus_022650,Ailurus_002603,Ailurus_020487,Ailurus_023167,Ailurus_000288,Ailurus_000286,Ailurus_004401,Ailurus_014686,Ailurus_016870,Ailurus_011399,Ailurus_001329,Ailurus_015970,Ailurus_000029,Ailurus_027126,Ailurus_027387,Ailurus_018639,Ailurus_0…
GO:BP	regulation of GO:CC size	GO:0032535	0.00137757	0.0372837	42	400	Ailurus_013994,Ailurus_008395,Ailurus_023167,Ailurus_000288,Ailurus_014686,Ailurus_016870,Ailurus_011399,Ailurus_015970,Ailurus_022265,Ailurus_027126,Ailurus_027387,Ailurus_026244,Ailurus_026243,Ailurus_004202,Ailurus_008685,Ailurus_024946,Ailurus_008679,Ailurus_006236,Ailurus_018698,Ailurus_016279,Ailurus_023218,Ailurus_000311,Ailurus_009398,Ailurus_024973,Ailurus_018285,Ailurus_000309,Ailurus_0…
GO:BP	leukocyte aggregation	GO:0070486	0.00138525	0.037357	5	14	Ailurus_018689,Ailurus_025002,Ailurus_024105,Ailurus_021287,Ailurus_025004,
GO:BP	epithelial cell fate commitment	GO:0072148	0.00138525	0.037357	5	14	Ailurus_022215,Ailurus_006195,Ailurus_013947,Ailurus_002655,Ailurus_025825,
GO:BP	negative regulation of alpha-beta T cell proliferation	GO:0046642	0.00138525	0.037357	5	14	Ailurus_023318,Ailurus_010462,Ailurus_024956,Ailurus_024955,Ailurus_025458,
GO:BP	regulation of ossification	GO:0030278	0.00138546	0.0369652	26	213	Ailurus_022215,Ailurus_013965,Ailurus_025946,Ailurus_004409,Ailurus_004408,Ailurus_018828,Ailurus_009057,Ailurus_002655,Ailurus_020092,Ailurus_016007,Ailurus_010928,Ailurus_004202,Ailurus_025374,Ailurus_010516,Ailurus_010119,Ailurus_006074,Ailurus_024970,Ailurus_011405,Ailurus_000539,Ailurus_021287,Ailurus_003651,Ailurus_023000,Ailurus_013030,Ailurus_000609,Ailurus_017297,Ailurus_007268,
GO:BP	regulation of osteoblast differentiation	GO:0045667	0.00138551	0.0368361	18	127	Ailurus_022215,Ailurus_025946,Ailurus_004409,Ailurus_004408,Ailurus_018828,Ailurus_009057,Ailurus_010516,Ailurus_010119,Ailurus_006074,Ailurus_024970,Ailurus_011405,Ailurus_000539,Ailurus_021287,Ailurus_003651,Ailurus_023000,Ailurus_013030,Ailurus_000609,Ailurus_017297,
GO:BP	regulation of acute inflammatory response	GO:0002673	0.00139732	0.0370192	15	97	Ailurus_022251,Ailurus_026852,Ailurus_022911,Ailurus_027177,Ailurus_022931,Ailurus_018689,Ailurus_024793,Ailurus_022373,Ailurus_024520,Ailurus_024522,Ailurus_011400,Ailurus_024105,Ailurus_005830,Ailurus_005462,Ailurus_018149,
GO:BP	positive regulation of JNK cascade	GO:0046330	0.00145331	0.0383675	21	159	Ailurus_022249,Ailurus_020276,Ailurus_000409,Ailurus_018196,Ailurus_017305,Ailurus_004202,Ailurus_008811,Ailurus_016078,Ailurus_014732,Ailurus_022373,Ailurus_008275,Ailurus_000771,Ailurus_006948,Ailurus_004742,Ailurus_012102,Ailurus_025080,Ailurus_008750,Ailurus_025049,Ailurus_018770,Ailurus_018582,Ailurus_019657,
GO:BP	alpha-beta T cell activation involved in immune response	GO:0002287	0.00146608	0.0385692	12	69	Ailurus_027105,Ailurus_008650,Ailurus_008672,Ailurus_025825,Ailurus_024734,Ailurus_010559,Ailurus_024956,Ailurus_024955,Ailurus_025458,Ailurus_006550,Ailurus_027096,Ailurus_001930,
GO:BP	alpha-beta T cell differentiation involved in immune response	GO:0002293	0.00146608	0.0385692	12	69	Ailurus_027105,Ailurus_008650,Ailurus_008672,Ailurus_025825,Ailurus_024734,Ailurus_010559,Ailurus_024956,Ailurus_024955,Ailurus_025458,Ailurus_006550,Ailurus_027096,Ailurus_001930,
GO:BP	neutrophil chemotaxis	GO:0030593	0.00150756	0.0393851	14	88	Ailurus_002610,Ailurus_020051,Ailurus_011152,Ailurus_025533,Ailurus_009528,Ailurus_027177,Ailurus_024793,Ailurus_002754,Ailurus_010329,Ailurus_025002,Ailurus_000112,Ailurus_025004,Ailurus_025003,Ailurus_007224,
GO:BP	regulation of innate immune response	GO:0045088	0.00153185	0.0398811	37	342	Ailurus_012652,Ailurus_009276,Ailurus_014819,Ailurus_020014,Ailurus_000294,Ailurus_026694,Ailurus_016870,Ailurus_002668,Ailurus_026852,Ailurus_018658,Ailurus_017305,Ailurus_027105,Ailurus_006412,Ailurus_026214,Ailurus_012967,Ailurus_027148,Ailurus_024793,Ailurus_012737,Ailurus_012736,Ailurus_000771,Ailurus_025002,Ailurus_025458,Ailurus_000111,Ailurus_024105,Ailurus_000147,Ailurus_008750,Ailurus_0…
GO:BP	proteolysis	GO:0006508	0.00159221	0.0413095	141	1716	Ailurus_015702,Ailurus_023329,Ailurus_020057,Ailurus_000685,Ailurus_000684,Ailurus_026836,Ailurus_009018,Ailurus_022250,Ailurus_022251,Ailurus_023339,Ailurus_022249,Ailurus_009276,Ailurus_023314,Ailurus_006185,Ailurus_002607,Ailurus_022650,Ailurus_008383,Ailurus_020005,Ailurus_020487,Ailurus_000656,Ailurus_023167,Ailurus_004401,Ailurus_004402,Ailurus_026694,Ailurus_018826,Ailurus_012497,Ailurus_0…
GO:BP	regulation of RNA biosynthetic process	GO:2001141	0.0016416	0.0424448	243	3168	Ailurus_024898,Ailurus_026836,Ailurus_010029,Ailurus_019084,Ailurus_002610,Ailurus_022249,Ailurus_010473,Ailurus_012892,Ailurus_002648,Ailurus_022215,Ailurus_000224,Ailurus_003970,Ailurus_024891,Ailurus_009275,Ailurus_013994,Ailurus_023318,Ailurus_021373,Ailurus_022220,Ailurus_025978,Ailurus_022227,Ailurus_013965,Ailurus_020257,Ailurus_025946,Ailurus_000409,Ailurus_022205,Ailurus_013947,Ailurus_0…
GO:BP	regulation of endocytosis	GO:0030100	0.00164388	0.0423581	33	296	Ailurus_016805,Ailurus_002610,Ailurus_012652,Ailurus_020281,Ailurus_013947,Ailurus_023167,Ailurus_005995,Ailurus_016870,Ailurus_000031,Ailurus_000030,Ailurus_016814,Ailurus_000029,Ailurus_002681,Ailurus_004612,Ailurus_014280,Ailurus_027328,Ailurus_018601,Ailurus_024793,Ailurus_000311,Ailurus_010119,Ailurus_001674,Ailurus_024520,Ailurus_024522,Ailurus_009367,Ailurus_000309,Ailurus_010329,Ailurus_0…
GO:BP	regulation of interleukin-6 production	GO:0032675	0.00165878	0.0425961	18	129	Ailurus_020014,Ailurus_024942,Ailurus_027177,Ailurus_016016,Ailurus_014730,Ailurus_024532,Ailurus_024793,Ailurus_024970,Ailurus_022308,Ailurus_000771,Ailurus_018709,Ailurus_000188,Ailurus_025458,Ailurus_015868,Ailurus_000147,Ailurus_006550,Ailurus_008750,Ailurus_025059,
GO:BP	regulation of lymphocyte proliferation	GO:0050670	0.00166347	0.0425713	27	227	Ailurus_012892,Ailurus_023318,Ailurus_000409,Ailurus_010462,Ailurus_018825,Ailurus_005989,Ailurus_018658,Ailurus_006038,Ailurus_018018,Ailurus_008679,Ailurus_008672,Ailurus_024532,Ailurus_012778,Ailurus_002754,Ailurus_019392,Ailurus_024956,Ailurus_024955,Ailurus_010329,Ailurus_000771,Ailurus_016753,Ailurus_000188,Ailurus_025458,Ailurus_000147,Ailurus_008750,Ailurus_023961,Ailurus_001930,Ailurus_0…
GO:BP	leukocyte mediated cytotoxicity	GO:0001909	0.00172342	0.0436599	15	99	Ailurus_023330,Ailurus_013776,Ailurus_014819,Ailurus_010085,Ailurus_000238,Ailurus_018658,Ailurus_008811,Ailurus_008679,Ailurus_006492,Ailurus_025458,Ailurus_026161,Ailurus_025059,Ailurus_016544,Ailurus_027099,Ailurus_027093,
GO:BP	negative regulation of immune response	GO:0050777	0.00173541	0.0438163	23	183	Ailurus_000685,Ailurus_000684,Ailurus_023318,Ailurus_014819,Ailurus_020014,Ailurus_010462,Ailurus_001187,Ailurus_006412,Ailurus_008650,Ailurus_027148,Ailurus_024532,Ailurus_012778,Ailurus_024520,Ailurus_024522,Ailurus_024734,Ailurus_024956,Ailurus_024955,Ailurus_010329,Ailurus_025458,Ailurus_000111,Ailurus_006550,Ailurus_025059,Ailurus_001930,
GO:BP	negative regulation of leukocyte cell-cell adhesion	GO:1903038	0.00181165	0.0455882	18	130	Ailurus_023318,Ailurus_010462,Ailurus_021890,Ailurus_008650,Ailurus_018689,Ailurus_024532,Ailurus_012778,Ailurus_024734,Ailurus_024956,Ailurus_024955,Ailurus_010329,Ailurus_016753,Ailurus_025458,Ailurus_024105,Ailurus_006550,Ailurus_001930,Ailurus_007496,Ailurus_022623,
GO:BP	regulation of actin filament-based process	GO:0032970	0.00183	0.0458964	42	406	Ailurus_019085,Ailurus_006195,Ailurus_018196,Ailurus_022650,Ailurus_002603,Ailurus_020487,Ailurus_023167,Ailurus_000288,Ailurus_014686,Ailurus_016870,Ailurus_011399,Ailurus_015970,Ailurus_000029,Ailurus_027126,Ailurus_027387,Ailurus_026243,Ailurus_004202,Ailurus_008685,Ailurus_008679,Ailurus_018698,Ailurus_016279,Ailurus_002754,Ailurus_024973,Ailurus_000772,Ailurus_018706,Ailurus_023026,Ailurus_0…
GO:BP	cellular response to stimulus	GO:0051716	0.00184567	0.0461355	511	7179	Ailurus_000685,Ailurus_000684,Ailurus_024896,Ailurus_023323,Ailurus_024411,Ailurus_024898,Ailurus_010029,Ailurus_012449,Ailurus_016805,Ailurus_013776,Ailurus_026849,Ailurus_003942,Ailurus_019084,Ailurus_002610,Ailurus_022249,Ailurus_009049,Ailurus_012652,Ailurus_012892,Ailurus_021127,Ailurus_020276,Ailurus_002648,Ailurus_022214,Ailurus_022215,Ailurus_003970,Ailurus_024891,Ailurus_009276,Ailurus_0…
GO:BP	negative regulation of multi-organism process	GO:0043901	0.00185976	0.0463339	22	173	Ailurus_012630,Ailurus_020014,Ailurus_000643,Ailurus_010462,Ailurus_012628,Ailurus_000281,Ailurus_010085,Ailurus_012223,Ailurus_025533,Ailurus_027575,Ailurus_004203,Ailurus_024532,Ailurus_001674,Ailurus_023896,Ailurus_015633,Ailurus_000111,Ailurus_006550,Ailurus_000609,Ailurus_022889,Ailurus_018151,Ailurus_017049,Ailurus_021996,
GO:BP	regulation of transcription, DNA-templated	GO:0006355	0.00186521	0.0463164	238	3103	Ailurus_024898,Ailurus_010029,Ailurus_019084,Ailurus_002610,Ailurus_022249,Ailurus_012892,Ailurus_002648,Ailurus_022215,Ailurus_000224,Ailurus_003970,Ailurus_024891,Ailurus_009275,Ailurus_013994,Ailurus_023318,Ailurus_021373,Ailurus_022220,Ailurus_025978,Ailurus_022227,Ailurus_013965,Ailurus_020257,Ailurus_025946,Ailurus_000409,Ailurus_022205,Ailurus_013947,Ailurus_022650,Ailurus_012628,Ailurus_0…
GO:BP	regulation of myotube differentiation	GO:0010830	0.00193184	0.0478131	11	62	Ailurus_012652,Ailurus_022215,Ailurus_025946,Ailurus_018810,Ailurus_018811,Ailurus_004409,Ailurus_004408,Ailurus_017176,Ailurus_008650,Ailurus_023809,Ailurus_008752,
GO:BP	negative regulation of RNA metabolic process	GO:0051253	0.00193918	0.0478372	111	1311	Ailurus_024898,Ailurus_019084,Ailurus_002648,Ailurus_022215,Ailurus_003970,Ailurus_013994,Ailurus_025978,Ailurus_022227,Ailurus_020257,Ailurus_025946,Ailurus_022205,Ailurus_022650,Ailurus_020005,Ailurus_004409,Ailurus_004408,Ailurus_025344,Ailurus_018826,Ailurus_018828,Ailurus_000035,Ailurus_027521,Ailurus_012483,Ailurus_002663,Ailurus_012009,Ailurus_002655,Ailurus_021165,Ailurus_012223,Ailurus_0…
GO:BP	pseudopodium assembly	GO:0031269	0.00196779	0.0483845	5	15	Ailurus_018196,Ailurus_014686,Ailurus_015970,Ailurus_018783,Ailurus_026102,
GO:BP	negative regulation of cell-cell adhesion	GO:0022408	0.00200278	0.0490843	23	185	Ailurus_023318,Ailurus_010462,Ailurus_027387,Ailurus_016078,Ailurus_021890,Ailurus_008650,Ailurus_018689,Ailurus_024532,Ailurus_012778,Ailurus_024734,Ailurus_024956,Ailurus_024955,Ailurus_010329,Ailurus_022308,Ailurus_016753,Ailurus_004537,Ailurus_025458,Ailurus_024105,Ailurus_006550,Ailurus_013030,Ailurus_001930,Ailurus_007496,Ailurus_022623,
GO:BP	negative regulation of secretion by cell	GO:1903531	0.00201318	0.0491791	27	230	Ailurus_022215,Ailurus_003970,Ailurus_006185,Ailurus_010462,Ailurus_023754,Ailurus_000039,Ailurus_000037,Ailurus_018639,Ailurus_016225,Ailurus_006038,Ailurus_019116,Ailurus_000716,Ailurus_016078,Ailurus_027177,Ailurus_022931,Ailurus_014730,Ailurus_024532,Ailurus_008266,Ailurus_008267,Ailurus_025458,Ailurus_015868,Ailurus_015633,Ailurus_006550,Ailurus_025277,Ailurus_016539,Ailurus_023716,Ailurus_0…
GO:BP	cellular response to chemical stimulus	GO:0070887	0.00203584	0.0495717	262	3457	Ailurus_000685,Ailurus_000684,Ailurus_024411,Ailurus_024898,Ailurus_010029,Ailurus_013776,Ailurus_003942,Ailurus_019084,Ailurus_002610,Ailurus_022249,Ailurus_012652,Ailurus_012892,Ailurus_021127,Ailurus_022215,Ailurus_013994,Ailurus_020051,Ailurus_023318,Ailurus_021373,Ailurus_023311,Ailurus_023314,Ailurus_013960,Ailurus_025946,Ailurus_006185,Ailurus_010462,Ailurus_022682,Ailurus_018196,Ailurus_0…
GO:BP	negative regulation of cellular carbohydrate metabolic process	GO:0010677	0.0020778	0.0504303	9	45	Ailurus_023311,Ailurus_008364,Ailurus_004409,Ailurus_004408,Ailurus_000039,Ailurus_006040,Ailurus_016279,Ailurus_000126,Ailurus_027042,
GO:BP	negative regulation of cell population proliferation	GO:0008285	0.00210237	0.0508624	70	765	Ailurus_026836,Ailurus_016805,Ailurus_002614,Ailurus_012892,Ailurus_002648,Ailurus_022215,Ailurus_009275,Ailurus_013994,Ailurus_023318,Ailurus_021373,Ailurus_022227,Ailurus_006195,Ailurus_013965,Ailurus_000409,Ailurus_010462,Ailurus_022205,Ailurus_013947,Ailurus_004409,Ailurus_004408,Ailurus_017977,Ailurus_002663,Ailurus_002655,Ailurus_027137,Ailurus_004202,Ailurus_004203,Ailurus_026498,Ailurus_0…
GO:BP	vacuole organization	GO:0007033	0.0021491	0.0518264	23	186	Ailurus_008377,Ailurus_002698,Ailurus_005995,Ailurus_018809,Ailurus_018666,Ailurus_018622,Ailurus_014026,Ailurus_012967,Ailurus_024942,Ailurus_008679,Ailurus_019104,Ailurus_006236,Ailurus_016925,Ailurus_023218,Ailurus_020152,Ailurus_000300,Ailurus_009812,Ailurus_010823,Ailurus_004359,Ailurus_002163,Ailurus_004583,Ailurus_019448,Ailurus_018108,
GO:BP	positive regulation of defense response	GO:0031349	0.0021632	0.0519998	39	373	Ailurus_012652,Ailurus_014819,Ailurus_000294,Ailurus_026694,Ailurus_016870,Ailurus_011152,Ailurus_002668,Ailurus_026852,Ailurus_014643,Ailurus_018658,Ailurus_017305,Ailurus_027105,Ailurus_027148,Ailurus_022931,Ailurus_014730,Ailurus_024793,Ailurus_022373,Ailurus_012737,Ailurus_012736,Ailurus_011400,Ailurus_000771,Ailurus_025002,Ailurus_025458,Ailurus_015868,Ailurus_024105,Ailurus_000147,Ailurus_0…
GO:BP	negative regulation of nucleic acid-templated transcription	GO:1903507	0.00216685	0.0519216	104	1220	Ailurus_024898,Ailurus_019084,Ailurus_002648,Ailurus_022215,Ailurus_003970,Ailurus_013994,Ailurus_025978,Ailurus_022227,Ailurus_020257,Ailurus_025946,Ailurus_022205,Ailurus_022650,Ailurus_020005,Ailurus_004409,Ailurus_004408,Ailurus_025344,Ailurus_018826,Ailurus_018828,Ailurus_000035,Ailurus_027521,Ailurus_012483,Ailurus_002663,Ailurus_012009,Ailurus_002655,Ailurus_021165,Ailurus_012223,Ailurus_0…
GO:BP	response to alcohol	GO:0097305	0.00218781	0.0522575	36	337	Ailurus_023330,Ailurus_019084,Ailurus_021373,Ailurus_022205,Ailurus_003936,Ailurus_001990,Ailurus_025533,Ailurus_024085,Ailurus_004202,Ailurus_010713,Ailurus_018689,Ailurus_022703,Ailurus_014730,Ailurus_000340,Ailurus_011211,Ailurus_025825,Ailurus_024970,Ailurus_012737,Ailurus_012736,Ailurus_024951,Ailurus_018709,Ailurus_025002,Ailurus_015683,Ailurus_000358,Ailurus_012102,Ailurus_021063,Ailurus_0…
GO:BP	apoptotic process involved in morphogenesis	GO:0060561	0.00221813	0.0528141	6	22	Ailurus_019084,Ailurus_022215,Ailurus_006185,Ailurus_008210,Ailurus_014730,Ailurus_014126,
GO:BP	negative regulation of RNA biosynthetic process	GO:1902679	0.00222371	0.0527798	104	1221	Ailurus_024898,Ailurus_019084,Ailurus_002648,Ailurus_022215,Ailurus_003970,Ailurus_013994,Ailurus_025978,Ailurus_022227,Ailurus_020257,Ailurus_025946,Ailurus_022205,Ailurus_022650,Ailurus_020005,Ailurus_004409,Ailurus_004408,Ailurus_025344,Ailurus_018826,Ailurus_018828,Ailurus_000035,Ailurus_027521,Ailurus_012483,Ailurus_002663,Ailurus_012009,Ailurus_002655,Ailurus_021165,Ailurus_012223,Ailurus_0…
GO:BP	response to ethanol	GO:0045471	0.00224298	0.0530697	25	209	Ailurus_023330,Ailurus_019084,Ailurus_022205,Ailurus_003936,Ailurus_001990,Ailurus_024085,Ailurus_004202,Ailurus_018689,Ailurus_022703,Ailurus_014730,Ailurus_025825,Ailurus_024970,Ailurus_012737,Ailurus_012736,Ailurus_025002,Ailurus_015683,Ailurus_021063,Ailurus_025280,Ailurus_025004,Ailurus_017288,Ailurus_017255,Ailurus_010868,Ailurus_007673,Ailurus_021996,Ailurus_011924,
GO:BP	regulation of GO:MF	GO:0065009	0.00225127	0.0530989	260	3434	Ailurus_015702,Ailurus_020053,Ailurus_000685,Ailurus_000684,Ailurus_024898,Ailurus_026836,Ailurus_026834,Ailurus_026849,Ailurus_019085,Ailurus_002610,Ailurus_022249,Ailurus_009049,Ailurus_012652,Ailurus_010473,Ailurus_012892,Ailurus_020281,Ailurus_020276,Ailurus_022215,Ailurus_003970,Ailurus_024891,Ailurus_022222,Ailurus_023314,Ailurus_025978,Ailurus_025946,Ailurus_000409,Ailurus_006185,Ailurus_0…
GO:BP	negative regulation of multicellular organismal process	GO:0051241	0.00227334	0.0534519	109	1290	Ailurus_026836,Ailurus_022215,Ailurus_003970,Ailurus_009275,Ailurus_013994,Ailurus_023318,Ailurus_002639,Ailurus_013965,Ailurus_025946,Ailurus_020014,Ailurus_006185,Ailurus_010462,Ailurus_013947,Ailurus_020005,Ailurus_020487,Ailurus_023754,Ailurus_004409,Ailurus_004408,Ailurus_000286,Ailurus_026694,Ailurus_017977,Ailurus_022299,Ailurus_002655,Ailurus_002681,Ailurus_020092,Ailurus_009073,Ailurus_0…
GO:BP	regulation of leukocyte cell-cell adhesion	GO:1903037	0.00241623	0.0566347	34	315	Ailurus_016805,Ailurus_023318,Ailurus_010462,Ailurus_018196,Ailurus_000288,Ailurus_018825,Ailurus_005989,Ailurus_018658,Ailurus_018018,Ailurus_008679,Ailurus_021890,Ailurus_008650,Ailurus_018689,Ailurus_024532,Ailurus_012778,Ailurus_025825,Ailurus_024734,Ailurus_024956,Ailurus_024955,Ailurus_010329,Ailurus_006081,Ailurus_016753,Ailurus_000188,Ailurus_025458,Ailurus_025422,Ailurus_024105,Ailurus_0…
GO:BP	regulation of nucleic acid-templated transcription	GO:1903506	0.0024251	0.0566661	241	3162	Ailurus_024898,Ailurus_010029,Ailurus_019084,Ailurus_002610,Ailurus_022249,Ailurus_010473,Ailurus_012892,Ailurus_002648,Ailurus_022215,Ailurus_000224,Ailurus_003970,Ailurus_024891,Ailurus_009275,Ailurus_013994,Ailurus_023318,Ailurus_021373,Ailurus_022220,Ailurus_025978,Ailurus_022227,Ailurus_013965,Ailurus_020257,Ailurus_025946,Ailurus_000409,Ailurus_022205,Ailurus_013947,Ailurus_022650,Ailurus_0…
GO:BP	myeloid leukocyte migration	GO:0097529	0.00246915	0.0571627	23	188	Ailurus_002610,Ailurus_020051,Ailurus_011152,Ailurus_014643,Ailurus_025533,Ailurus_004202,Ailurus_009528,Ailurus_027177,Ailurus_024793,Ailurus_022373,Ailurus_002754,Ailurus_024970,Ailurus_010329,Ailurus_025002,Ailurus_000112,Ailurus_024105,Ailurus_005830,Ailurus_015855,Ailurus_013030,Ailurus_025004,Ailurus_025003,Ailurus_007268,Ailurus_007224,
GO:BP	regulation of transport	GO:0051049	0.00247757	0.0571817	163	2045	Ailurus_015700,Ailurus_020053,Ailurus_026834,Ailurus_016805,Ailurus_026849,Ailurus_019085,Ailurus_002610,Ailurus_022249,Ailurus_012652,Ailurus_010473,Ailurus_012892,Ailurus_020281,Ailurus_022215,Ailurus_003970,Ailurus_000643,Ailurus_006185,Ailurus_010462,Ailurus_018196,Ailurus_013947,Ailurus_020480,Ailurus_002607,Ailurus_019010,Ailurus_002603,Ailurus_020005,Ailurus_020487,Ailurus_023754,Ailurus_0…
GO:BP	regulation of cell-substrate adhesion	GO:0010810	0.00249244	0.0573491	26	222	Ailurus_022215,Ailurus_023314,Ailurus_006195,Ailurus_013960,Ailurus_018196,Ailurus_022650,Ailurus_027387,Ailurus_004202,Ailurus_000311,Ailurus_009153,Ailurus_002754,Ailurus_000309,Ailurus_024951,Ailurus_011899,Ailurus_026306,Ailurus_000120,Ailurus_015633,Ailurus_004742,Ailurus_015855,Ailurus_026161,Ailurus_015489,Ailurus_025049,Ailurus_013030,Ailurus_006391,Ailurus_001930,Ailurus_007268,
GO:BP	natural killer cell mediated immunity	GO:0002228	0.0025114	0.0576091	11	64	Ailurus_013776,Ailurus_014819,Ailurus_008679,Ailurus_006492,Ailurus_014315,Ailurus_025458,Ailurus_026161,Ailurus_025059,Ailurus_016544,Ailurus_027099,Ailurus_027093,
GO:BP	positive regulation of cell population proliferation	GO:0008284	0.00259702	0.059392	89	1024	Ailurus_026836,Ailurus_016805,Ailurus_002614,Ailurus_012892,Ailurus_022214,Ailurus_022215,Ailurus_003970,Ailurus_013994,Ailurus_020051,Ailurus_002639,Ailurus_022226,Ailurus_022227,Ailurus_025946,Ailurus_000643,Ailurus_025957,Ailurus_018196,Ailurus_013947,Ailurus_001516,Ailurus_019010,Ailurus_004409,Ailurus_004408,Ailurus_000286,Ailurus_026694,Ailurus_018825,Ailurus_017977,Ailurus_016870,Ailurus_0…
GO:BP	negative regulation of gene silencing by miRNA	GO:0060965	0.00271088	0.0610677	5	16	Ailurus_023191,Ailurus_023192,Ailurus_014966,Ailurus_006550,Ailurus_011918,
GO:BP	establishment of skin barrier	GO:0061436	0.00271088	0.0610677	5	16	Ailurus_020057,Ailurus_002639,Ailurus_025133,Ailurus_008822,Ailurus_006334,
GO:BP	regulation of lymphocyte apoptotic process	GO:0070228	0.00271117	0.0607108	12	74	Ailurus_010462,Ailurus_009082,Ailurus_018658,Ailurus_006038,Ailurus_024532,Ailurus_010329,Ailurus_008908,Ailurus_025458,Ailurus_024105,Ailurus_004373,Ailurus_023961,Ailurus_001930,
GO:BP	negative regulation of ERK1 and ERK2 cascade	GO:0070373	0.00271117	0.0607108	12	74	Ailurus_011397,Ailurus_004233,Ailurus_021890,Ailurus_006250,Ailurus_018689,Ailurus_021268,Ailurus_021267,Ailurus_018701,Ailurus_015633,Ailurus_015855,Ailurus_026120,Ailurus_018567,
GO:BP	neutrophil migration	GO:1990266	0.00282518	0.0628894	15	104	Ailurus_002610,Ailurus_020051,Ailurus_011152,Ailurus_025533,Ailurus_009528,Ailurus_027177,Ailurus_024793,Ailurus_002754,Ailurus_010329,Ailurus_025002,Ailurus_000112,Ailurus_024105,Ailurus_025004,Ailurus_025003,Ailurus_007224,
GO:BP	response to organic substance	GO:0010033	0.00283613	0.062947	272	3624	Ailurus_023330,Ailurus_000685,Ailurus_000684,Ailurus_024898,Ailurus_026836,Ailurus_010029,Ailurus_013776,Ailurus_026849,Ailurus_003942,Ailurus_019084,Ailurus_002610,Ailurus_022249,Ailurus_012652,Ailurus_012892,Ailurus_021127,Ailurus_022215,Ailurus_003970,Ailurus_013994,Ailurus_023318,Ailurus_021373,Ailurus_023311,Ailurus_023314,Ailurus_013960,Ailurus_025946,Ailurus_006185,Ailurus_010462,Ailurus_0…
GO:BP	response to folic acid	GO:0051593	0.00283853	0.0628151	6	23	Ailurus_000685,Ailurus_000684,Ailurus_024085,Ailurus_019568,Ailurus_013030,Ailurus_021996,
GO:BP	negative regulation of CD4-positive, alpha-beta T cell differentiation	GO:0043371	0.00283853	0.0628151	6	23	Ailurus_008650,Ailurus_024734,Ailurus_024956,Ailurus_024955,Ailurus_006550,Ailurus_001930,
GO:BP	regulation of GO:BP involved in symbiotic interaction	GO:0043903	0.00285974	0.0629143	29	259	Ailurus_026836,Ailurus_022215,Ailurus_022226,Ailurus_012630,Ailurus_000643,Ailurus_012628,Ailurus_020002,Ailurus_000281,Ailurus_010085,Ailurus_022299,Ailurus_012223,Ailurus_025533,Ailurus_027575,Ailurus_004203,Ailurus_024532,Ailurus_012778,Ailurus_001674,Ailurus_011211,Ailurus_013878,Ailurus_023896,Ailurus_000512,Ailurus_025458,Ailurus_015633,Ailurus_006550,Ailurus_025043,Ailurus_027099,Ailurus_0…
GO:BP	locomotion	GO:0040011	0.00286295	0.0628012	151	1883	Ailurus_000685,Ailurus_000684,Ailurus_023323,Ailurus_026834,Ailurus_016805,Ailurus_003942,Ailurus_002614,Ailurus_002610,Ailurus_012652,Ailurus_022214,Ailurus_022215,Ailurus_003970,Ailurus_020051,Ailurus_023311,Ailurus_023314,Ailurus_006195,Ailurus_013960,Ailurus_025946,Ailurus_000409,Ailurus_018196,Ailurus_008395,Ailurus_024836,Ailurus_001516,Ailurus_022650,Ailurus_002603,Ailurus_012628,Ailurus_0…
GO:BP	positive regulation of I-kappaB kinase/NF-kappaB signaling	GO:0043123	0.00299979	0.0656116	18	136	Ailurus_022249,Ailurus_002668,Ailurus_016827,Ailurus_018658,Ailurus_017305,Ailurus_008224,Ailurus_014732,Ailurus_014730,Ailurus_010119,Ailurus_012778,Ailurus_024994,Ailurus_023896,Ailurus_000771,Ailurus_006952,Ailurus_006953,Ailurus_000147,Ailurus_025003,Ailurus_000609,
GO:BP	response to wounding	GO:0009611	0.00305068	0.0665313	65	711	Ailurus_000685,Ailurus_000684,Ailurus_022215,Ailurus_003970,Ailurus_020051,Ailurus_006195,Ailurus_013960,Ailurus_013965,Ailurus_010462,Ailurus_018196,Ailurus_022205,Ailurus_008395,Ailurus_000665,Ailurus_018810,Ailurus_018811,Ailurus_026694,Ailurus_002655,Ailurus_000029,Ailurus_005706,Ailurus_004612,Ailurus_005700,Ailurus_027112,Ailurus_008865,Ailurus_026272,Ailurus_000097,Ailurus_018626,Ailurus_0…
GO:BP	positive regulation of angiogenesis	GO:0045766	0.00306567	0.066665	22	180	Ailurus_002610,Ailurus_013960,Ailurus_000643,Ailurus_013947,Ailurus_019010,Ailurus_017977,Ailurus_003172,Ailurus_004202,Ailurus_021890,Ailurus_014730,Ailurus_024532,Ailurus_026965,Ailurus_010119,Ailurus_009153,Ailurus_012763,Ailurus_010329,Ailurus_023026,Ailurus_023027,Ailurus_000126,Ailurus_003651,Ailurus_006550,Ailurus_013030,
GO:BP	regulation of actin cytoskeleton reorganization	GO:2000249	0.00307848	0.0667506	8	39	Ailurus_018196,Ailurus_002603,Ailurus_016870,Ailurus_026243,Ailurus_004202,Ailurus_024973,Ailurus_000120,Ailurus_018582,
GO:BP	positive regulation of response to external stimulus	GO:0032103	0.00308197	0.0666342	50	518	Ailurus_012652,Ailurus_003970,Ailurus_014819,Ailurus_022650,Ailurus_000294,Ailurus_025102,Ailurus_026694,Ailurus_017977,Ailurus_016870,Ailurus_011152,Ailurus_002668,Ailurus_026852,Ailurus_014643,Ailurus_025533,Ailurus_018658,Ailurus_017305,Ailurus_027105,Ailurus_004202,Ailurus_009528,Ailurus_027148,Ailurus_022931,Ailurus_014730,Ailurus_024793,Ailurus_022373,Ailurus_010119,Ailurus_024970,Ailurus_0…
GO:BP	transcription, DNA-templated	GO:0006351	0.00308559	0.0665214	247	3264	Ailurus_024898,Ailurus_010029,Ailurus_019084,Ailurus_002610,Ailurus_022249,Ailurus_012892,Ailurus_002648,Ailurus_022215,Ailurus_000224,Ailurus_003970,Ailurus_024891,Ailurus_009275,Ailurus_013994,Ailurus_023318,Ailurus_021373,Ailurus_022220,Ailurus_025978,Ailurus_022227,Ailurus_013965,Ailurus_020257,Ailurus_025946,Ailurus_000409,Ailurus_022205,Ailurus_013947,Ailurus_022650,Ailurus_012628,Ailurus_0…
GO:BP	regulation of actin cytoskeleton organization	GO:0032956	0.00321294	0.0690691	37	357	Ailurus_018196,Ailurus_022650,Ailurus_002603,Ailurus_023167,Ailurus_000288,Ailurus_014686,Ailurus_016870,Ailurus_011399,Ailurus_015970,Ailurus_027126,Ailurus_027387,Ailurus_026243,Ailurus_004202,Ailurus_008685,Ailurus_008679,Ailurus_018698,Ailurus_016279,Ailurus_002754,Ailurus_024973,Ailurus_000772,Ailurus_018706,Ailurus_023026,Ailurus_023027,Ailurus_000120,Ailurus_026974,Ailurus_018783,Ailurus_0…
GO:BP	ossification	GO:0001503	0.00321294	0.0690691	37	357	Ailurus_025728,Ailurus_022215,Ailurus_013965,Ailurus_025946,Ailurus_004409,Ailurus_004408,Ailurus_026694,Ailurus_018828,Ailurus_000035,Ailurus_009057,Ailurus_002655,Ailurus_020092,Ailurus_025533,Ailurus_016007,Ailurus_010928,Ailurus_004202,Ailurus_025374,Ailurus_010516,Ailurus_019569,Ailurus_024910,Ailurus_022373,Ailurus_016925,Ailurus_010119,Ailurus_000340,Ailurus_023890,Ailurus_006074,Ailurus_0…
GO:BP	T-helper cell differentiation	GO:0042093	0.00322394	0.0689118	11	66	Ailurus_027105,Ailurus_008650,Ailurus_008672,Ailurus_025825,Ailurus_024734,Ailurus_010559,Ailurus_024956,Ailurus_024955,Ailurus_006550,Ailurus_027096,Ailurus_001930,
GO:BP	positive regulation of response to biotic stimulus	GO:0002833	0.00323729	0.0690011	30	273	Ailurus_012652,Ailurus_014819,Ailurus_000294,Ailurus_026694,Ailurus_016870,Ailurus_002668,Ailurus_026852,Ailurus_018658,Ailurus_017305,Ailurus_027105,Ailurus_027148,Ailurus_024793,Ailurus_012737,Ailurus_012736,Ailurus_000771,Ailurus_025002,Ailurus_025458,Ailurus_024105,Ailurus_000147,Ailurus_008750,Ailurus_024186,Ailurus_025004,Ailurus_005678,Ailurus_016544,Ailurus_027099,Ailurus_027093,Ailurus_0…
GO:BP	positive regulation of leukocyte activation	GO:0002696	0.00324049	0.0688742	36	345	Ailurus_016805,Ailurus_002610,Ailurus_012892,Ailurus_018196,Ailurus_018825,Ailurus_005989,Ailurus_002668,Ailurus_000238,Ailurus_018658,Ailurus_006038,Ailurus_018018,Ailurus_008679,Ailurus_008650,Ailurus_024532,Ailurus_024793,Ailurus_002754,Ailurus_025825,Ailurus_024734,Ailurus_024956,Ailurus_024955,Ailurus_006081,Ailurus_000771,Ailurus_000188,Ailurus_025458,Ailurus_025422,Ailurus_024105,Ailurus_0…
GO:BP	RNA biosynthetic process	GO:0032774	0.00327181	0.0693439	251	3326	Ailurus_024898,Ailurus_026836,Ailurus_010029,Ailurus_019084,Ailurus_002610,Ailurus_022249,Ailurus_010473,Ailurus_012892,Ailurus_002648,Ailurus_022215,Ailurus_000224,Ailurus_003970,Ailurus_024891,Ailurus_009275,Ailurus_013994,Ailurus_023318,Ailurus_021373,Ailurus_022220,Ailurus_025978,Ailurus_022227,Ailurus_013965,Ailurus_020257,Ailurus_025946,Ailurus_000409,Ailurus_022205,Ailurus_013947,Ailurus_0…
GO:BP	regulation of viral process	GO:0050792	0.00328432	0.0694135	25	215	Ailurus_026836,Ailurus_022215,Ailurus_022226,Ailurus_012630,Ailurus_012628,Ailurus_020002,Ailurus_000281,Ailurus_022299,Ailurus_025533,Ailurus_027575,Ailurus_004203,Ailurus_012778,Ailurus_001674,Ailurus_011211,Ailurus_013878,Ailurus_023896,Ailurus_000512,Ailurus_025458,Ailurus_015633,Ailurus_006550,Ailurus_025043,Ailurus_027099,Ailurus_000609,Ailurus_017049,Ailurus_021996,
GO:BP	insulin receptor signaling pathway	GO:0008286	0.00330344	0.069622	19	148	Ailurus_003936,Ailurus_008865,Ailurus_026243,Ailurus_026214,Ailurus_000716,Ailurus_019569,Ailurus_006040,Ailurus_000735,Ailurus_018679,Ailurus_018681,Ailurus_018680,Ailurus_012976,Ailurus_024956,Ailurus_024955,Ailurus_024961,Ailurus_008752,Ailurus_025277,Ailurus_017297,Ailurus_027042,
GO:BP	inflammatory response to antigenic stimulus	GO:0002437	0.00332857	0.0699557	10	57	Ailurus_000685,Ailurus_000684,Ailurus_022215,Ailurus_000288,Ailurus_001187,Ailurus_016078,Ailurus_024532,Ailurus_024793,Ailurus_012778,Ailurus_004120,
GO:BP	natural killer cell mediated cytotoxicity	GO:0042267	0.00332857	0.0699557	10	57	Ailurus_013776,Ailurus_014819,Ailurus_008679,Ailurus_006492,Ailurus_025458,Ailurus_026161,Ailurus_025059,Ailurus_016544,Ailurus_027099,Ailurus_027093,
GO:BP	regulation of phosphatidylinositol 3-kinase activity	GO:0043551	0.00332857	0.0699557	10	57	Ailurus_018196,Ailurus_014686,Ailurus_002655,Ailurus_004202,Ailurus_019104,Ailurus_021890,Ailurus_010119,Ailurus_025825,Ailurus_019446,Ailurus_007224,
GO:BP	lymphocyte mediated immunity	GO:0002449	0.00333248	0.0694558	28	250	Ailurus_023330,Ailurus_013776,Ailurus_022249,Ailurus_023318,Ailurus_014819,Ailurus_000288,Ailurus_004612,Ailurus_018658,Ailurus_026470,Ailurus_008679,Ailurus_008650,Ailurus_006492,Ailurus_016016,Ailurus_024532,Ailurus_024793,Ailurus_012778,Ailurus_024520,Ailurus_024522,Ailurus_010559,Ailurus_014315,Ailurus_025458,Ailurus_026161,Ailurus_025059,Ailurus_016544,Ailurus_027099,Ailurus_027096,Ailurus_0…
GO:BP	chemotaxis	GO:0006935	0.00335522	0.0697366	56	597	Ailurus_023323,Ailurus_026834,Ailurus_003942,Ailurus_002610,Ailurus_012652,Ailurus_022215,Ailurus_020051,Ailurus_001516,Ailurus_022650,Ailurus_002603,Ailurus_020002,Ailurus_025102,Ailurus_017977,Ailurus_011152,Ailurus_026852,Ailurus_004620,Ailurus_014643,Ailurus_011380,Ailurus_025533,Ailurus_027126,Ailurus_004202,Ailurus_018625,Ailurus_008210,Ailurus_018018,Ailurus_009528,Ailurus_008679,Ailurus_0…
GO:BP	amide transport	GO:0042886	0.00345992	0.0717147	147	1836	Ailurus_013776,Ailurus_023339,Ailurus_026849,Ailurus_002615,Ailurus_022249,Ailurus_012892,Ailurus_021365,Ailurus_022215,Ailurus_000643,Ailurus_010462,Ailurus_022682,Ailurus_018196,Ailurus_020480,Ailurus_002609,Ailurus_002607,Ailurus_000660,Ailurus_002603,Ailurus_020487,Ailurus_023754,Ailurus_018810,Ailurus_018811,Ailurus_004401,Ailurus_000039,Ailurus_002698,Ailurus_004420,Ailurus_014686,Ailurus_0…
GO:BP	GO:CC disassembly	GO:0022411	0.00352248	0.0728109	52	547	Ailurus_026836,Ailurus_012652,Ailurus_003970,Ailurus_002639,Ailurus_023311,Ailurus_006195,Ailurus_013965,Ailurus_004401,Ailurus_026694,Ailurus_010085,Ailurus_018809,Ailurus_014686,Ailurus_022283,Ailurus_012223,Ailurus_000011,Ailurus_008872,Ailurus_018269,Ailurus_024942,Ailurus_008224,Ailurus_019104,Ailurus_006236,Ailurus_023801,Ailurus_023802,Ailurus_016279,Ailurus_009144,Ailurus_022113,Ailurus_0…
GO:BP	positive regulation of cytoskeleton organization	GO:0051495	0.00357283	0.0736493	29	263	Ailurus_018196,Ailurus_022650,Ailurus_023167,Ailurus_000288,Ailurus_014686,Ailurus_016870,Ailurus_011399,Ailurus_015970,Ailurus_027126,Ailurus_026243,Ailurus_004202,Ailurus_008685,Ailurus_008679,Ailurus_018698,Ailurus_016279,Ailurus_024973,Ailurus_012737,Ailurus_012736,Ailurus_023026,Ailurus_023027,Ailurus_026974,Ailurus_018783,Ailurus_004358,Ailurus_008750,Ailurus_025043,Ailurus_026102,Ailurus_0…
GO:BP	regulation of triglyceride biosynthetic process	GO:0010866	0.00358011	0.0735976	6	24	Ailurus_008234,Ailurus_000140,Ailurus_019629,Ailurus_025277,Ailurus_023961,Ailurus_023964,
GO:BP	regulation of phosphorylation	GO:0042325	0.00363387	0.0744992	136	1684	Ailurus_002610,Ailurus_022249,Ailurus_012652,Ailurus_012892,Ailurus_020276,Ailurus_022215,Ailurus_003970,Ailurus_023311,Ailurus_025978,Ailurus_013960,Ailurus_000409,Ailurus_000643,Ailurus_018196,Ailurus_001516,Ailurus_022650,Ailurus_019010,Ailurus_000665,Ailurus_013955,Ailurus_000652,Ailurus_023754,Ailurus_004409,Ailurus_004408,Ailurus_025102,Ailurus_000288,Ailurus_000286,Ailurus_000039,Ailurus_0…
GO:BP	lipoxygenase pathway	GO:0019372	0.00363767	0.0743746	5	17	Ailurus_000685,Ailurus_000684,Ailurus_025133,Ailurus_023690,Ailurus_005462,
GO:BP	negative regulation of posttranscriptional gene silencing	GO:0060149	0.00363767	0.0743746	5	17	Ailurus_023191,Ailurus_023192,Ailurus_014966,Ailurus_006550,Ailurus_011918,
GO:BP	negative regulation of gene silencing by RNA	GO:0060967	0.00363767	0.0743746	5	17	Ailurus_023191,Ailurus_023192,Ailurus_014966,Ailurus_006550,Ailurus_011918,
GO:BP	pseudopodium organization	GO:0031268	0.00363767	0.0743746	5	17	Ailurus_018196,Ailurus_014686,Ailurus_015970,Ailurus_018783,Ailurus_026102,
GO:BP	mononuclear cell differentiation	GO:1903131	0.003644	0.0737029	43	434	Ailurus_019084,Ailurus_025946,Ailurus_013947,Ailurus_002603,Ailurus_013956,Ailurus_004409,Ailurus_004408,Ailurus_015792,Ailurus_018658,Ailurus_027105,Ailurus_004202,Ailurus_006037,Ailurus_008679,Ailurus_018485,Ailurus_018486,Ailurus_008650,Ailurus_008672,Ailurus_027148,Ailurus_014732,Ailurus_024532,Ailurus_024793,Ailurus_012778,Ailurus_025825,Ailurus_024734,Ailurus_010559,Ailurus_024956,Ailurus_0…
GO:BP	regulation of catalytic activity	GO:0050790	0.00372172	0.0750731	184	2365	Ailurus_000685,Ailurus_000684,Ailurus_026836,Ailurus_019085,Ailurus_022249,Ailurus_009049,Ailurus_010473,Ailurus_012892,Ailurus_020281,Ailurus_020276,Ailurus_022215,Ailurus_003970,Ailurus_022222,Ailurus_023314,Ailurus_025978,Ailurus_000409,Ailurus_006185,Ailurus_010462,Ailurus_018196,Ailurus_001516,Ailurus_022650,Ailurus_000665,Ailurus_013955,Ailurus_023167,Ailurus_000288,Ailurus_000286,Ailurus_0…
GO:BP	taxis	GO:0042330	0.0037305	0.0750489	56	600	Ailurus_023323,Ailurus_026834,Ailurus_003942,Ailurus_002610,Ailurus_012652,Ailurus_022215,Ailurus_020051,Ailurus_001516,Ailurus_022650,Ailurus_002603,Ailurus_020002,Ailurus_025102,Ailurus_017977,Ailurus_011152,Ailurus_026852,Ailurus_004620,Ailurus_014643,Ailurus_011380,Ailurus_025533,Ailurus_027126,Ailurus_004202,Ailurus_018625,Ailurus_008210,Ailurus_018018,Ailurus_009528,Ailurus_008679,Ailurus_0…
GO:BP	regulation of T cell activation	GO:0050863	0.00373426	0.0749242	36	348	Ailurus_016805,Ailurus_023318,Ailurus_010462,Ailurus_018196,Ailurus_018825,Ailurus_005989,Ailurus_018658,Ailurus_006037,Ailurus_018018,Ailurus_008679,Ailurus_008650,Ailurus_008672,Ailurus_024532,Ailurus_012778,Ailurus_025825,Ailurus_019392,Ailurus_024734,Ailurus_024956,Ailurus_024955,Ailurus_010329,Ailurus_006081,Ailurus_016753,Ailurus_000188,Ailurus_025458,Ailurus_025422,Ailurus_024105,Ailurus_0…
GO:BP	peptide secretion	GO:0002790	0.00374509	0.0749417	61	665	Ailurus_026849,Ailurus_022249,Ailurus_022215,Ailurus_000643,Ailurus_010462,Ailurus_002603,Ailurus_020487,Ailurus_023754,Ailurus_004401,Ailurus_000039,Ailurus_005989,Ailurus_026852,Ailurus_014643,Ailurus_022911,Ailurus_018639,Ailurus_016225,Ailurus_025371,Ailurus_006038,Ailurus_008234,Ailurus_006040,Ailurus_016078,Ailurus_006236,Ailurus_027177,Ailurus_008650,Ailurus_006250,Ailurus_006492,Ailurus_0…
GO:BP	regulation of protein metabolic process	GO:0051246	0.00376556	0.0751515	228	3000	Ailurus_000685,Ailurus_000684,Ailurus_026836,Ailurus_022251,Ailurus_019084,Ailurus_002610,Ailurus_022249,Ailurus_012652,Ailurus_012892,Ailurus_020276,Ailurus_002648,Ailurus_022215,Ailurus_003970,Ailurus_023311,Ailurus_023314,Ailurus_025978,Ailurus_013960,Ailurus_013965,Ailurus_020257,Ailurus_000409,Ailurus_000643,Ailurus_006185,Ailurus_018196,Ailurus_022205,Ailurus_002609,Ailurus_001516,Ailurus_0…
GO:BP	regulation of T cell apoptotic process	GO:0070232	0.0038192	0.0760202	9	49	Ailurus_010462,Ailurus_018658,Ailurus_006038,Ailurus_010329,Ailurus_008908,Ailurus_025458,Ailurus_024105,Ailurus_004373,Ailurus_023961,
GO:BP	regulation of membrane permeability	GO:0090559	0.0038522	0.0764748	13	87	Ailurus_023167,Ailurus_025102,Ailurus_022088,Ailurus_008402,Ailurus_008290,Ailurus_012737,Ailurus_012736,Ailurus_026778,Ailurus_015848,Ailurus_027833,Ailurus_026599,Ailurus_006391,Ailurus_027042,
GO:BP	negative regulation of catalytic activity	GO:0043086	0.00394448	0.0781006	74	838	Ailurus_000685,Ailurus_000684,Ailurus_026836,Ailurus_012892,Ailurus_022215,Ailurus_022222,Ailurus_023314,Ailurus_025978,Ailurus_000409,Ailurus_006185,Ailurus_010462,Ailurus_022650,Ailurus_000665,Ailurus_013955,Ailurus_018826,Ailurus_000039,Ailurus_014686,Ailurus_011397,Ailurus_026283,Ailurus_008846,Ailurus_003172,Ailurus_000077,Ailurus_004233,Ailurus_026214,Ailurus_019107,Ailurus_019116,Ailurus_0…
GO:BP	osteoblast differentiation	GO:0001649	0.00401125	0.0781881	22	184	Ailurus_022215,Ailurus_025946,Ailurus_004409,Ailurus_004408,Ailurus_018828,Ailurus_009057,Ailurus_025533,Ailurus_010516,Ailurus_024910,Ailurus_016925,Ailurus_010119,Ailurus_006074,Ailurus_024970,Ailurus_011405,Ailurus_000539,Ailurus_000358,Ailurus_021287,Ailurus_003651,Ailurus_023000,Ailurus_013030,Ailurus_000609,Ailurus_017297,
GO:BP	regulation of mitochondrion organization	GO:0010821	0.00412004	0.0801012	20	162	Ailurus_000685,Ailurus_000684,Ailurus_023167,Ailurus_025102,Ailurus_012223,Ailurus_008872,Ailurus_024942,Ailurus_006236,Ailurus_008402,Ailurus_024973,Ailurus_012737,Ailurus_012736,Ailurus_015848,Ailurus_008750,Ailurus_025059,Ailurus_025277,Ailurus_026599,Ailurus_025266,Ailurus_016187,Ailurus_027042,
GO:BP	negative regulation of lymphocyte activation	GO:0051250	0.00413196	0.080126	19	151	Ailurus_023318,Ailurus_000409,Ailurus_010462,Ailurus_022911,Ailurus_008650,Ailurus_027148,Ailurus_024532,Ailurus_012778,Ailurus_024734,Ailurus_024956,Ailurus_024955,Ailurus_010329,Ailurus_016753,Ailurus_018701,Ailurus_025458,Ailurus_006550,Ailurus_001930,Ailurus_007496,Ailurus_022623,
GO:BP	positive regulation of protein polymerization	GO:0032273	0.00413196	0.080126	19	151	Ailurus_023167,Ailurus_000288,Ailurus_014686,Ailurus_016870,Ailurus_015970,Ailurus_027126,Ailurus_026243,Ailurus_004202,Ailurus_008685,Ailurus_008679,Ailurus_018698,Ailurus_012737,Ailurus_012736,Ailurus_026974,Ailurus_018783,Ailurus_008750,Ailurus_026102,Ailurus_021996,Ailurus_019657,
GO:BP	regulation of biological quality	GO:0065008	0.00416792	0.0804088	305	4136	Ailurus_020057,Ailurus_020053,Ailurus_000685,Ailurus_000684,Ailurus_026836,Ailurus_026834,Ailurus_013776,Ailurus_026849,Ailurus_019085,Ailurus_019084,Ailurus_019082,Ailurus_002610,Ailurus_012652,Ailurus_010473,Ailurus_012892,Ailurus_021365,Ailurus_022215,Ailurus_003970,Ailurus_024891,Ailurus_009275,Ailurus_013994,Ailurus_023317,Ailurus_002639,Ailurus_012879,Ailurus_008377,Ailurus_012630,Ailurus_0…
GO:BP	negative regulation of viral process	GO:0048525	0.0042586	0.079508	13	88	Ailurus_012630,Ailurus_012628,Ailurus_000281,Ailurus_025533,Ailurus_027575,Ailurus_004203,Ailurus_001674,Ailurus_023896,Ailurus_015633,Ailurus_006550,Ailurus_000609,Ailurus_017049,Ailurus_021996,
GO:BP	regulation of T-helper cell differentiation	GO:0045622	0.00426311	0.0793952	8	41	Ailurus_008650,Ailurus_008672,Ailurus_025825,Ailurus_024734,Ailurus_024956,Ailurus_024955,Ailurus_006550,Ailurus_001930,
GO:BP	nucleic acid-templated transcription	GO:0097659	0.00434778	0.0807721	249	3315	Ailurus_024898,Ailurus_010029,Ailurus_019084,Ailurus_002610,Ailurus_022249,Ailurus_010473,Ailurus_012892,Ailurus_002648,Ailurus_022215,Ailurus_000224,Ailurus_003970,Ailurus_024891,Ailurus_009275,Ailurus_013994,Ailurus_023318,Ailurus_021373,Ailurus_022220,Ailurus_025978,Ailurus_022227,Ailurus_013965,Ailurus_020257,Ailurus_025946,Ailurus_000409,Ailurus_022205,Ailurus_013947,Ailurus_022650,Ailurus_0…
GO:BP	regulation of membrane protein ectodomain proteolysis	GO:0051043	0.00445637	0.0825855	6	25	Ailurus_006185,Ailurus_009144,Ailurus_024532,Ailurus_009367,Ailurus_024105,Ailurus_018151,
GO:BP	localization of cell	GO:0051674	0.00448207	0.0828577	131	1624	Ailurus_000685,Ailurus_000684,Ailurus_016805,Ailurus_003942,Ailurus_002614,Ailurus_002610,Ailurus_022214,Ailurus_022215,Ailurus_003970,Ailurus_020051,Ailurus_023311,Ailurus_023314,Ailurus_006195,Ailurus_013960,Ailurus_025946,Ailurus_000409,Ailurus_018196,Ailurus_008395,Ailurus_024836,Ailurus_022650,Ailurus_002603,Ailurus_004409,Ailurus_004408,Ailurus_025102,Ailurus_000288,Ailurus_026694,Ailurus_0…
GO:BP	cell motility	GO:0048870	0.00448207	0.0828577	131	1624	Ailurus_000685,Ailurus_000684,Ailurus_016805,Ailurus_003942,Ailurus_002614,Ailurus_002610,Ailurus_022214,Ailurus_022215,Ailurus_003970,Ailurus_020051,Ailurus_023311,Ailurus_023314,Ailurus_006195,Ailurus_013960,Ailurus_025946,Ailurus_000409,Ailurus_018196,Ailurus_008395,Ailurus_024836,Ailurus_022650,Ailurus_002603,Ailurus_004409,Ailurus_004408,Ailurus_025102,Ailurus_000288,Ailurus_026694,Ailurus_0…
GO:BP	actin filament organization	GO:0007015	0.00449076	0.0826124	41	414	Ailurus_016805,Ailurus_019085,Ailurus_010473,Ailurus_021127,Ailurus_018196,Ailurus_022650,Ailurus_023167,Ailurus_000288,Ailurus_014686,Ailurus_016870,Ailurus_011399,Ailurus_015970,Ailurus_027126,Ailurus_027387,Ailurus_026243,Ailurus_004202,Ailurus_025374,Ailurus_008685,Ailurus_008679,Ailurus_019569,Ailurus_008428,Ailurus_018698,Ailurus_016279,Ailurus_024973,Ailurus_000772,Ailurus_018706,Ailurus_0…
GO:BP	negative regulation of actin filament polymerization	GO:0030837	0.00454596	0.0834239	7	33	Ailurus_023167,Ailurus_027387,Ailurus_000772,Ailurus_016132,Ailurus_015489,Ailurus_025043,Ailurus_021996,
GO:BP	response to interferon-gamma	GO:0034341	0.00456849	0.0836334	22	186	Ailurus_013776,Ailurus_021127,Ailurus_010462,Ailurus_018196,Ailurus_012628,Ailurus_000281,Ailurus_005995,Ailurus_016870,Ailurus_000238,Ailurus_025533,Ailurus_004612,Ailurus_016225,Ailurus_026214,Ailurus_012778,Ailurus_023896,Ailurus_025457,Ailurus_025458,Ailurus_000120,Ailurus_018783,Ailurus_016132,Ailurus_026102,Ailurus_021996,
GO:BP	positive regulation of ERK1 and ERK2 cascade	GO:0070374	0.00459463	0.0839079	24	209	Ailurus_022215,Ailurus_023754,Ailurus_000288,Ailurus_002655,Ailurus_000031,Ailurus_000030,Ailurus_025533,Ailurus_004202,Ailurus_000716,Ailurus_022373,Ailurus_012778,Ailurus_009398,Ailurus_009153,Ailurus_025825,Ailurus_024961,Ailurus_025458,Ailurus_015622,Ailurus_008750,Ailurus_025059,Ailurus_013030,Ailurus_005678,Ailurus_017297,Ailurus_018582,Ailurus_019445,
GO:BP	regulation of sprouting angiogenesis	GO:1903670	0.00470417	0.0854932	12	79	Ailurus_022215,Ailurus_013960,Ailurus_025946,Ailurus_013947,Ailurus_019010,Ailurus_021890,Ailurus_024532,Ailurus_009153,Ailurus_003651,Ailurus_027449,Ailurus_013030,Ailurus_025257,
GO:BP	extracellular matrix disassembly	GO:0022617	0.00470417	0.0854932	12	79	Ailurus_026836,Ailurus_012652,Ailurus_006195,Ailurus_026694,Ailurus_010085,Ailurus_014686,Ailurus_000011,Ailurus_009144,Ailurus_024951,Ailurus_024105,Ailurus_024795,Ailurus_018151,
GO:BP	natural killer cell activation involved in immune response	GO:0002323	0.00477138	0.0862977	5	18	Ailurus_013776,Ailurus_008679,Ailurus_027148,Ailurus_025458,Ailurus_026161,
GO:BP	leukocyte migration involved in inflammatory response	GO:0002523	0.00477138	0.0862977	5	18	Ailurus_002610,Ailurus_026852,Ailurus_025002,Ailurus_024105,Ailurus_025004,
GO:BP	protein catabolic process in the vacuole	GO:0007039	0.00477138	0.0862977	5	18	Ailurus_024942,Ailurus_006236,Ailurus_018679,Ailurus_018681,Ailurus_018680,
GO:BP	bone trabecula morphogenesis	GO:0061430	0.00477138	0.0862977	5	18	Ailurus_026694,Ailurus_000035,Ailurus_002655,Ailurus_021287,Ailurus_013030,
GO:BP	diacylglycerol metabolic process	GO:0046339	0.00477138	0.0862977	5	18	Ailurus_026215,Ailurus_019107,Ailurus_008234,Ailurus_004547,Ailurus_019629,
GO:BP	regulation of immune effector process	GO:0002697	0.00487804	0.087179	39	391	Ailurus_022251,Ailurus_002610,Ailurus_022249,Ailurus_023318,Ailurus_014819,Ailurus_020014,Ailurus_000409,Ailurus_000238,Ailurus_026852,Ailurus_018658,Ailurus_018633,Ailurus_006038,Ailurus_027177,Ailurus_008650,Ailurus_008672,Ailurus_016016,Ailurus_027148,Ailurus_024532,Ailurus_024793,Ailurus_009398,Ailurus_024520,Ailurus_024522,Ailurus_025825,Ailurus_024734,Ailurus_024956,Ailurus_024955,Ailurus_0…
GO:BP	positive regulation of sprouting angiogenesis	GO:1903672	0.00497327	0.0886703	8	42	Ailurus_013960,Ailurus_013947,Ailurus_019010,Ailurus_021890,Ailurus_024532,Ailurus_009153,Ailurus_003651,Ailurus_013030,
GO:BP	activated T cell proliferation	GO:0050798	0.00503738	0.089601	9	51	Ailurus_002610,Ailurus_018658,Ailurus_016753,Ailurus_000188,Ailurus_025458,Ailurus_008750,Ailurus_023961,Ailurus_008758,Ailurus_008756,
GO:BP	negative regulation of carbohydrate metabolic process	GO:0045912	0.00503738	0.089601	9	51	Ailurus_023311,Ailurus_008364,Ailurus_004409,Ailurus_004408,Ailurus_000039,Ailurus_006040,Ailurus_016279,Ailurus_000126,Ailurus_027042,
GO:BP	negative regulation of protein polymerization	GO:0032272	0.00503738	0.089601	9	51	Ailurus_023167,Ailurus_027387,Ailurus_000772,Ailurus_000187,Ailurus_026306,Ailurus_016132,Ailurus_015489,Ailurus_025043,Ailurus_021996,
GO:BP	response to toxic substance	GO:0009636	0.00505638	0.0893056	59	648	Ailurus_023330,Ailurus_000685,Ailurus_000684,Ailurus_026834,Ailurus_019084,Ailurus_010462,Ailurus_022205,Ailurus_003936,Ailurus_002603,Ailurus_013956,Ailurus_001990,Ailurus_022091,Ailurus_025121,Ailurus_026694,Ailurus_018826,Ailurus_013120,Ailurus_016824,Ailurus_025533,Ailurus_024085,Ailurus_008872,Ailurus_004202,Ailurus_004200,Ailurus_005555,Ailurus_018689,Ailurus_022703,Ailurus_014730,Ailurus_0…
GO:BP	regulation of proteolysis	GO:0030162	0.00512535	0.0903118	71	807	Ailurus_000685,Ailurus_000684,Ailurus_026836,Ailurus_022251,Ailurus_022249,Ailurus_023314,Ailurus_006185,Ailurus_002607,Ailurus_022650,Ailurus_023167,Ailurus_018826,Ailurus_000065,Ailurus_000028,Ailurus_018658,Ailurus_008846,Ailurus_024085,Ailurus_008872,Ailurus_004202,Ailurus_024942,Ailurus_006049,Ailurus_021890,Ailurus_006236,Ailurus_027177,Ailurus_010713,Ailurus_006492,Ailurus_009144,Ailurus_0…
GO:BP	regulation of CD4-positive, alpha-beta T cell activation	GO:2000514	0.00513247	0.0902259	11	70	Ailurus_023318,Ailurus_010462,Ailurus_008650,Ailurus_008672,Ailurus_025825,Ailurus_024734,Ailurus_024956,Ailurus_024955,Ailurus_025458,Ailurus_006550,Ailurus_001930,
GO:BP	regulation of multi-organism process	GO:0043900	0.00518154	0.0908763	45	468	Ailurus_023330,Ailurus_026836,Ailurus_022215,Ailurus_022226,Ailurus_012630,Ailurus_020014,Ailurus_000643,Ailurus_010462,Ailurus_000665,Ailurus_012628,Ailurus_020002,Ailurus_000281,Ailurus_010085,Ailurus_022299,Ailurus_012223,Ailurus_025533,Ailurus_027575,Ailurus_004203,Ailurus_014029,Ailurus_018633,Ailurus_012967,Ailurus_008672,Ailurus_027148,Ailurus_024532,Ailurus_012778,Ailurus_001674,Ailurus_0…
GO:BP	entry into host	GO:0044409	0.00521639	0.0912747	12	80	Ailurus_012630,Ailurus_012628,Ailurus_020002,Ailurus_027575,Ailurus_012778,Ailurus_001674,Ailurus_023896,Ailurus_018709,Ailurus_025458,Ailurus_009812,Ailurus_027099,Ailurus_021996,
GO:BP	cellular response to biotic stimulus	GO:0071216	0.00528308	0.0922271	25	223	Ailurus_010029,Ailurus_006185,Ailurus_010462,Ailurus_022091,Ailurus_000035,Ailurus_010085,Ailurus_016870,Ailurus_002668,Ailurus_025533,Ailurus_017305,Ailurus_016016,Ailurus_018689,Ailurus_026959,Ailurus_024532,Ailurus_025825,Ailurus_025457,Ailurus_000111,Ailurus_005830,Ailurus_000147,Ailurus_006550,Ailurus_008750,Ailurus_026113,Ailurus_000609,Ailurus_011924,Ailurus_025097,
GO:BP	regulation of response to biotic stimulus	GO:0002831	0.00529595	0.0922378	41	418	Ailurus_012652,Ailurus_009276,Ailurus_014819,Ailurus_020014,Ailurus_010462,Ailurus_000294,Ailurus_026694,Ailurus_016870,Ailurus_002668,Ailurus_026852,Ailurus_018658,Ailurus_017305,Ailurus_027105,Ailurus_018633,Ailurus_006412,Ailurus_026214,Ailurus_012967,Ailurus_008672,Ailurus_027148,Ailurus_024793,Ailurus_012737,Ailurus_012736,Ailurus_000771,Ailurus_025002,Ailurus_025458,Ailurus_000111,Ailurus_0…
GO:BP	cell killing	GO:0001906	0.00531823	0.0924118	21	177	Ailurus_023330,Ailurus_013776,Ailurus_014819,Ailurus_000643,Ailurus_010085,Ailurus_000238,Ailurus_018658,Ailurus_008811,Ailurus_008679,Ailurus_006492,Ailurus_027148,Ailurus_010329,Ailurus_025457,Ailurus_025458,Ailurus_026161,Ailurus_025059,Ailurus_025003,Ailurus_016544,Ailurus_027099,Ailurus_027093,Ailurus_000609,
GO:BP	positive regulation of metabolic process	GO:0009893	0.00535566	0.0928479	285	3858	Ailurus_024898,Ailurus_026836,Ailurus_010029,Ailurus_019084,Ailurus_002610,Ailurus_022249,Ailurus_012652,Ailurus_010473,Ailurus_012892,Ailurus_020276,Ailurus_002648,Ailurus_022213,Ailurus_022215,Ailurus_003970,Ailurus_024891,Ailurus_009275,Ailurus_013994,Ailurus_021373,Ailurus_022222,Ailurus_013960,Ailurus_013965,Ailurus_025946,Ailurus_000409,Ailurus_000643,Ailurus_006185,Ailurus_018196,Ailurus_0…
GO:BP	positive regulation of vasculature development	GO:1904018	0.00535697	0.0926571	23	200	Ailurus_002610,Ailurus_022215,Ailurus_013960,Ailurus_000643,Ailurus_013947,Ailurus_019010,Ailurus_017977,Ailurus_003172,Ailurus_004202,Ailurus_021890,Ailurus_014730,Ailurus_024532,Ailurus_026965,Ailurus_010119,Ailurus_009153,Ailurus_012763,Ailurus_010329,Ailurus_023026,Ailurus_023027,Ailurus_000126,Ailurus_003651,Ailurus_006550,Ailurus_013030,
GO:BP	regulation of adaptive immune response based on somatic recombination of immune receptors built from immunoglobulin superfamily domains	GO:0002822	0.00542343	0.0935915	20	166	Ailurus_022249,Ailurus_023318,Ailurus_000409,Ailurus_005989,Ailurus_004612,Ailurus_018658,Ailurus_008650,Ailurus_008672,Ailurus_016016,Ailurus_024532,Ailurus_024793,Ailurus_024520,Ailurus_024522,Ailurus_024734,Ailurus_024956,Ailurus_024955,Ailurus_006550,Ailurus_027099,Ailurus_027093,Ailurus_001930,
GO:BP	endothelium development	GO:0003158	0.00543803	0.0936286	16	122	Ailurus_000685,Ailurus_000684,Ailurus_002614,Ailurus_022215,Ailurus_003970,Ailurus_006195,Ailurus_013947,Ailurus_001516,Ailurus_000288,Ailurus_000286,Ailurus_025121,Ailurus_027387,Ailurus_022703,Ailurus_014730,Ailurus_012763,Ailurus_013030,
GO:BP	cellular response to organic substance	GO:0071310	0.00546213	0.0938289	220	2907	Ailurus_000685,Ailurus_000684,Ailurus_024898,Ailurus_010029,Ailurus_013776,Ailurus_003942,Ailurus_019084,Ailurus_022249,Ailurus_012652,Ailurus_012892,Ailurus_021127,Ailurus_022215,Ailurus_013994,Ailurus_023318,Ailurus_021373,Ailurus_023311,Ailurus_023314,Ailurus_013960,Ailurus_025946,Ailurus_006185,Ailurus_010462,Ailurus_022682,Ailurus_018196,Ailurus_022205,Ailurus_013947,Ailurus_008395,Ailurus_0…
GO:BP	negative regulation of alpha-beta T cell differentiation	GO:0046639	0.00548099	0.0939384	6	26	Ailurus_008650,Ailurus_024734,Ailurus_024956,Ailurus_024955,Ailurus_006550,Ailurus_001930,
GO:BP	CD4-positive, alpha-beta T cell activation	GO:0035710	0.00551724	0.0943447	14	101	Ailurus_023318,Ailurus_010462,Ailurus_027105,Ailurus_008650,Ailurus_008672,Ailurus_025825,Ailurus_024734,Ailurus_010559,Ailurus_024956,Ailurus_024955,Ailurus_025458,Ailurus_006550,Ailurus_027096,Ailurus_001930,
GO:BP	negative regulation of viral life cycle	GO:1903901	0.00572685	0.097707	11	71	Ailurus_012630,Ailurus_012628,Ailurus_000281,Ailurus_027575,Ailurus_004203,Ailurus_001674,Ailurus_023896,Ailurus_006550,Ailurus_000609,Ailurus_017049,Ailurus_021996,
GO:BP	regulation of lamellipodium organization	GO:1902743	0.00574958	0.097873	9	52	Ailurus_006195,Ailurus_018196,Ailurus_004409,Ailurus_004408,Ailurus_018698,Ailurus_000311,Ailurus_000309,Ailurus_000772,Ailurus_018706,
GO:BP	lymphocyte homeostasis	GO:0002260	0.00577203	0.0980333	12	81	Ailurus_000409,Ailurus_005989,Ailurus_009082,Ailurus_018658,Ailurus_008865,Ailurus_006038,Ailurus_008679,Ailurus_019392,Ailurus_008908,Ailurus_025458,Ailurus_025011,Ailurus_023961,
GO:BP	protein secretion	GO:0009306	0.00580522	0.098375	56	613	Ailurus_026849,Ailurus_022249,Ailurus_022215,Ailurus_000643,Ailurus_010462,Ailurus_002603,Ailurus_020487,Ailurus_023754,Ailurus_004401,Ailurus_000039,Ailurus_005989,Ailurus_026852,Ailurus_014643,Ailurus_022911,Ailurus_018639,Ailurus_016225,Ailurus_025371,Ailurus_006038,Ailurus_008234,Ailurus_006040,Ailurus_016078,Ailurus_006236,Ailurus_027177,Ailurus_008650,Ailurus_006250,Ailurus_006492,Ailurus_0…
GO:BP	innate immune response-activating signal transduction	GO:0002758	0.00589078	0.0996006	19	156	Ailurus_000294,Ailurus_016870,Ailurus_002668,Ailurus_026852,Ailurus_018658,Ailurus_017305,Ailurus_027105,Ailurus_027148,Ailurus_024793,Ailurus_000771,Ailurus_025002,Ailurus_025458,Ailurus_000147,Ailurus_024186,Ailurus_025004,Ailurus_005678,Ailurus_018582,Ailurus_011924,Ailurus_019657,
GO:BP	mononuclear cell migration	GO:0071674	0.00589078	0.0996006	19	156	Ailurus_020051,Ailurus_018196,Ailurus_002603,Ailurus_025102,Ailurus_000288,Ailurus_017977,Ailurus_004620,Ailurus_025533,Ailurus_018658,Ailurus_004202,Ailurus_022373,Ailurus_024970,Ailurus_010329,Ailurus_025458,Ailurus_024105,Ailurus_008750,Ailurus_025011,Ailurus_025003,Ailurus_007268,
GO:BP	regulation of angiogenesis	GO:0045765	0.00592958	0.0998079	32	309	Ailurus_003942,Ailurus_002610,Ailurus_022215,Ailurus_013960,Ailurus_025946,Ailurus_000643,Ailurus_013947,Ailurus_008395,Ailurus_001516,Ailurus_019010,Ailurus_017977,Ailurus_003172,Ailurus_004202,Ailurus_021890,Ailurus_014730,Ailurus_024532,Ailurus_026965,Ailurus_010119,Ailurus_009153,Ailurus_012763,Ailurus_000782,Ailurus_010329,Ailurus_024961,Ailurus_023026,Ailurus_023027,Ailurus_000126,Ailurus_0…
GO:BP	receptor-mediated endocytosis	GO:0006898	0.00598108	0.10045	31	297	Ailurus_010016,Ailurus_002610,Ailurus_012652,Ailurus_002639,Ailurus_022684,Ailurus_013947,Ailurus_023167,Ailurus_004420,Ailurus_000031,Ailurus_000030,Ailurus_004620,Ailurus_002681,Ailurus_014280,Ailurus_019568,Ailurus_024793,Ailurus_023218,Ailurus_000311,Ailurus_011405,Ailurus_008270,Ailurus_000309,Ailurus_000782,Ailurus_018709,Ailurus_014784,Ailurus_000112,Ailurus_026506,Ailurus_015495,Ailurus_0…
GO:BP	regulation of primary metabolic process	GO:0080090	0.0059812	0.100228	415	5810	Ailurus_000685,Ailurus_000684,Ailurus_024898,Ailurus_026836,Ailurus_010029,Ailurus_022251,Ailurus_023339,Ailurus_019084,Ailurus_002610,Ailurus_022249,Ailurus_012652,Ailurus_010473,Ailurus_012892,Ailurus_020276,Ailurus_002648,Ailurus_022215,Ailurus_000224,Ailurus_003970,Ailurus_024891,Ailurus_009275,Ailurus_013994,Ailurus_023318,Ailurus_021373,Ailurus_022220,Ailurus_023311,Ailurus_023314,Ailurus_0…
GO:BP	positive regulation of catalytic activity	GO:0043085	0.00598657	0.100095	119	1470	Ailurus_019085,Ailurus_022249,Ailurus_009049,Ailurus_012892,Ailurus_020281,Ailurus_020276,Ailurus_003970,Ailurus_000409,Ailurus_018196,Ailurus_001516,Ailurus_022650,Ailurus_000665,Ailurus_023167,Ailurus_000288,Ailurus_000286,Ailurus_002698,Ailurus_015521,Ailurus_011155,Ailurus_011397,Ailurus_002655,Ailurus_000032,Ailurus_025772,Ailurus_015970,Ailurus_002677,Ailurus_025533,Ailurus_004612,Ailurus_0…
GO:BP	establishment of protein localization to extracellular region	GO:0035592	0.00599928	0.100085	56	614	Ailurus_026849,Ailurus_022249,Ailurus_022215,Ailurus_000643,Ailurus_010462,Ailurus_002603,Ailurus_020487,Ailurus_023754,Ailurus_004401,Ailurus_000039,Ailurus_005989,Ailurus_026852,Ailurus_014643,Ailurus_022911,Ailurus_018639,Ailurus_016225,Ailurus_025371,Ailurus_006038,Ailurus_008234,Ailurus_006040,Ailurus_016078,Ailurus_006236,Ailurus_027177,Ailurus_008650,Ailurus_006250,Ailurus_006492,Ailurus_0…
GO:BP	negative regulation of cardiac muscle cell differentiation	GO:2000726	0.00613485	0.102121	5	19	Ailurus_013947,Ailurus_022299,Ailurus_004742,Ailurus_017288,Ailurus_027042,
GO:BP	regulation of anatomical structure morphogenesis	GO:0022603	0.00616395	0.102379	95	1139	Ailurus_026836,Ailurus_003942,Ailurus_002610,Ailurus_012652,Ailurus_022215,Ailurus_006195,Ailurus_013960,Ailurus_013965,Ailurus_025946,Ailurus_000409,Ailurus_000643,Ailurus_006185,Ailurus_018196,Ailurus_022205,Ailurus_013947,Ailurus_008395,Ailurus_001516,Ailurus_019010,Ailurus_002602,Ailurus_018810,Ailurus_018811,Ailurus_000288,Ailurus_017977,Ailurus_016870,Ailurus_005989,Ailurus_015970,Ailurus_0…
GO:BP	negative regulation of G protein-coupled receptor signaling pathway	GO:0045744	0.00618945	0.102576	10	62	Ailurus_019010,Ailurus_011397,Ailurus_002677,Ailurus_025371,Ailurus_000716,Ailurus_016279,Ailurus_000311,Ailurus_000309,Ailurus_018709,Ailurus_025059,
GO:BP	lymphocyte apoptotic process	GO:0070227	0.00624305	0.103237	13	92	Ailurus_000409,Ailurus_010462,Ailurus_009082,Ailurus_018658,Ailurus_006038,Ailurus_024532,Ailurus_010329,Ailurus_008908,Ailurus_025458,Ailurus_024105,Ailurus_004373,Ailurus_023961,Ailurus_001930,
GO:BP	phospholipid metabolic process	GO:0006644	0.00626319	0.103343	45	473	Ailurus_025728,Ailurus_022213,Ailurus_010007,Ailurus_003970,Ailurus_008364,Ailurus_018196,Ailurus_024839,Ailurus_023172,Ailurus_001135,Ailurus_001134,Ailurus_026693,Ailurus_014686,Ailurus_010058,Ailurus_000002,Ailurus_000243,Ailurus_002655,Ailurus_000022,Ailurus_005706,Ailurus_004202,Ailurus_026215,Ailurus_008699,Ailurus_024948,Ailurus_019569,Ailurus_018485,Ailurus_019104,Ailurus_021890,Ailurus_0…
GO:BP	transmembrane receptor protein tyrosine kinase signaling pathway	GO:0007169	0.00626383	0.103127	71	814	Ailurus_024896,Ailurus_003942,Ailurus_022215,Ailurus_003970,Ailurus_023311,Ailurus_013960,Ailurus_018196,Ailurus_013947,Ailurus_003936,Ailurus_023167,Ailurus_026694,Ailurus_022076,Ailurus_016870,Ailurus_012483,Ailurus_009057,Ailurus_011397,Ailurus_002655,Ailurus_000016,Ailurus_005575,Ailurus_008865,Ailurus_026243,Ailurus_004202,Ailurus_026214,Ailurus_008811,Ailurus_018018,Ailurus_000716,Ailurus_0…
GO:BP	positive regulation of neuron apoptotic process	GO:0043525	0.00637358	0.104705	12	82	Ailurus_018196,Ailurus_004409,Ailurus_004408,Ailurus_002655,Ailurus_008872,Ailurus_014730,Ailurus_017194,Ailurus_016753,Ailurus_013493,Ailurus_018770,Ailurus_027042,Ailurus_027047,
GO:BP	regulation of pattern recognition receptor signaling pathway	GO:0062207	0.00637358	0.104705	12	82	Ailurus_012652,Ailurus_020014,Ailurus_006412,Ailurus_012737,Ailurus_012736,Ailurus_000771,Ailurus_000111,Ailurus_000147,Ailurus_025059,Ailurus_024186,Ailurus_000609,Ailurus_011924,
GO:BP	positive regulation of interferon-gamma production	GO:0032729	0.0063741	0.104258	11	72	Ailurus_004612,Ailurus_018658,Ailurus_008672,Ailurus_016016,Ailurus_000771,Ailurus_000188,Ailurus_025458,Ailurus_008750,Ailurus_027096,Ailurus_018582,Ailurus_011924,
GO:BP	positive regulation of lymphocyte migration	GO:2000403	0.0063926	0.104334	7	35	Ailurus_025102,Ailurus_025533,Ailurus_018658,Ailurus_004202,Ailurus_025458,Ailurus_024105,Ailurus_008750,
GO:BP	regulation of vesicle-mediated transport	GO:0060627	0.00652981	0.106343	59	656	Ailurus_016805,Ailurus_002610,Ailurus_012652,Ailurus_020281,Ailurus_022215,Ailurus_018196,Ailurus_013947,Ailurus_018810,Ailurus_018811,Ailurus_023167,Ailurus_000037,Ailurus_002698,Ailurus_005995,Ailurus_016870,Ailurus_000238,Ailurus_000031,Ailurus_000030,Ailurus_016814,Ailurus_000029,Ailurus_002681,Ailurus_004612,Ailurus_005700,Ailurus_016007,Ailurus_014280,Ailurus_021810,Ailurus_027328,Ailurus_0…
GO:BP	autophagosome organization	GO:1905037	0.00656804	0.106734	14	103	Ailurus_002698,Ailurus_018809,Ailurus_018622,Ailurus_014026,Ailurus_024942,Ailurus_019104,Ailurus_006236,Ailurus_016925,Ailurus_023218,Ailurus_000300,Ailurus_010823,Ailurus_002163,Ailurus_004583,Ailurus_018108,
GO:BP	regulation of protein phosphorylation	GO:0001932	0.00664907	0.107818	125	1559	Ailurus_002610,Ailurus_022249,Ailurus_012652,Ailurus_012892,Ailurus_020276,Ailurus_022215,Ailurus_003970,Ailurus_023311,Ailurus_025978,Ailurus_013960,Ailurus_000409,Ailurus_000643,Ailurus_018196,Ailurus_001516,Ailurus_022650,Ailurus_019010,Ailurus_000665,Ailurus_013955,Ailurus_023754,Ailurus_025102,Ailurus_000288,Ailurus_000286,Ailurus_011397,Ailurus_002655,Ailurus_000031,Ailurus_000030,Ailurus_0…
GO:BP	type 2 immune response	GO:0042092	0.00666131	0.107784	8	44	Ailurus_010462,Ailurus_008650,Ailurus_024532,Ailurus_025825,Ailurus_024734,Ailurus_010559,Ailurus_027096,Ailurus_001930,
GO:BP	negative regulation of interleukin-6 production	GO:0032715	0.00666131	0.107784	8	44	Ailurus_020014,Ailurus_024942,Ailurus_027177,Ailurus_014730,Ailurus_024532,Ailurus_000771,Ailurus_006550,Ailurus_025059,
GO:BP	regulation of actin nucleation	GO:0051125	0.00666768	0.107425	6	27	Ailurus_023167,Ailurus_008685,Ailurus_008679,Ailurus_018698,Ailurus_026974,Ailurus_021996,
GO:BP	organ or tissue specific immune response	GO:0002251	0.00666768	0.107425	6	27	Ailurus_000643,Ailurus_026852,Ailurus_012562,Ailurus_024970,Ailurus_000609,Ailurus_007443,
GO:BP	auditory receptor cell stereocilium organization	GO:0060088	0.00666768	0.107425	6	27	Ailurus_023317,Ailurus_008210,Ailurus_015489,Ailurus_026120,Ailurus_021966,Ailurus_021965,
GO:BP	animal organ maturation	GO:0048799	0.00666768	0.107425	6	27	Ailurus_025728,Ailurus_002655,Ailurus_025374,Ailurus_009584,Ailurus_021287,Ailurus_000609,
GO:BP	regulation of localization	GO:0032879	0.0067956	0.108556	220	2921	Ailurus_015700,Ailurus_015702,Ailurus_020053,Ailurus_026834,Ailurus_016805,Ailurus_026849,Ailurus_003942,Ailurus_019085,Ailurus_002614,Ailurus_002610,Ailurus_022249,Ailurus_012652,Ailurus_010473,Ailurus_012892,Ailurus_020281,Ailurus_022214,Ailurus_022215,Ailurus_003970,Ailurus_023314,Ailurus_006195,Ailurus_013960,Ailurus_025946,Ailurus_000409,Ailurus_000643,Ailurus_006185,Ailurus_010462,Ailurus_0…
GO:BP	apoptotic mitochondrial changes	GO:0008637	0.00684503	0.109114	18	147	Ailurus_000685,Ailurus_000684,Ailurus_023340,Ailurus_023167,Ailurus_025102,Ailurus_022088,Ailurus_009082,Ailurus_008872,Ailurus_008402,Ailurus_008290,Ailurus_012737,Ailurus_012736,Ailurus_015848,Ailurus_008750,Ailurus_025059,Ailurus_026599,Ailurus_002163,Ailurus_027042,
GO:BP	regulation of growth	GO:0040008	0.00684773	0.108927	65	737	Ailurus_026836,Ailurus_012892,Ailurus_022215,Ailurus_003970,Ailurus_024891,Ailurus_000643,Ailurus_018196,Ailurus_013947,Ailurus_008395,Ailurus_022650,Ailurus_000043,Ailurus_022088,Ailurus_026205,Ailurus_010085,Ailurus_022299,Ailurus_002655,Ailurus_012223,Ailurus_022265,Ailurus_008846,Ailurus_026244,Ailurus_004202,Ailurus_014029,Ailurus_026214,Ailurus_024946,Ailurus_000735,Ailurus_024532,Ailurus_0…
GO:BP	pattern recognition receptor signaling pathway	GO:0002221	0.00685452	0.108805	21	181	Ailurus_012652,Ailurus_020014,Ailurus_002668,Ailurus_026852,Ailurus_018658,Ailurus_017305,Ailurus_006412,Ailurus_027148,Ailurus_012737,Ailurus_012736,Ailurus_000771,Ailurus_025002,Ailurus_025458,Ailurus_000111,Ailurus_000147,Ailurus_025059,Ailurus_024186,Ailurus_025004,Ailurus_005678,Ailurus_000609,Ailurus_011924,
GO:BP	production of molecular mediator involved in inflammatory response	GO:0002532	0.006941	0.109945	10	63	Ailurus_011152,Ailurus_014643,Ailurus_004200,Ailurus_023690,Ailurus_024793,Ailurus_025457,Ailurus_000147,Ailurus_005462,Ailurus_006550,Ailurus_016539,
GO:BP	positive regulation of mitochondrial membrane permeability	GO:0035794	0.006941	0.109945	10	63	Ailurus_023167,Ailurus_025102,Ailurus_008402,Ailurus_008290,Ailurus_012737,Ailurus_012736,Ailurus_015848,Ailurus_027833,Ailurus_006391,Ailurus_027042,
GO:BP	stress-activated MAPK cascade	GO:0051403	0.00703983	0.111043	33	325	Ailurus_022249,Ailurus_020276,Ailurus_000409,Ailurus_018196,Ailurus_022076,Ailurus_002668,Ailurus_002655,Ailurus_005700,Ailurus_026283,Ailurus_017305,Ailurus_004202,Ailurus_026498,Ailurus_008811,Ailurus_010788,Ailurus_016078,Ailurus_018689,Ailurus_014732,Ailurus_022373,Ailurus_008275,Ailurus_000771,Ailurus_006948,Ailurus_025458,Ailurus_004742,Ailurus_012102,Ailurus_006550,Ailurus_025080,Ailurus_0…
GO:BP	positive regulation of GO:CC movement	GO:0051272	0.00712631	0.112172	52	567	Ailurus_003942,Ailurus_002614,Ailurus_022215,Ailurus_023314,Ailurus_006195,Ailurus_013960,Ailurus_022650,Ailurus_004409,Ailurus_004408,Ailurus_025102,Ailurus_000288,Ailurus_026694,Ailurus_014686,Ailurus_025533,Ailurus_005700,Ailurus_018658,Ailurus_027387,Ailurus_003172,Ailurus_004202,Ailurus_014029,Ailurus_018601,Ailurus_006037,Ailurus_008685,Ailurus_005170,Ailurus_024946,Ailurus_000716,Ailurus_0…
GO:BP	regulation of metabolic process	GO:0019222	0.00717719	0.112737	468	6630	Ailurus_000685,Ailurus_000684,Ailurus_024898,Ailurus_026836,Ailurus_010029,Ailurus_022251,Ailurus_023339,Ailurus_019084,Ailurus_002610,Ailurus_022249,Ailurus_012652,Ailurus_010473,Ailurus_012892,Ailurus_020276,Ailurus_021365,Ailurus_002648,Ailurus_022213,Ailurus_022215,Ailurus_000224,Ailurus_003970,Ailurus_024891,Ailurus_009275,Ailurus_013994,Ailurus_023318,Ailurus_021373,Ailurus_022220,Ailurus_0…
GO:BP	regulation of adaptive immune response	GO:0002819	0.00729052	0.114279	21	182	Ailurus_022249,Ailurus_023318,Ailurus_000409,Ailurus_005989,Ailurus_004612,Ailurus_018658,Ailurus_008650,Ailurus_008672,Ailurus_016016,Ailurus_024532,Ailurus_024793,Ailurus_024520,Ailurus_024522,Ailurus_024734,Ailurus_024956,Ailurus_024955,Ailurus_006550,Ailurus_008750,Ailurus_027099,Ailurus_027093,Ailurus_001930,
GO:BP	cellular modified amino acid metabolic process	GO:0006575	0.00730316	0.114239	24	217	Ailurus_000685,Ailurus_000684,Ailurus_026836,Ailurus_002615,Ailurus_001135,Ailurus_001134,Ailurus_000043,Ailurus_013120,Ailurus_009081,Ailurus_008846,Ailurus_009718,Ailurus_008221,Ailurus_019568,Ailurus_018689,Ailurus_022123,Ailurus_018700,Ailurus_017223,Ailurus_025280,Ailurus_017030,Ailurus_017288,Ailurus_008339,Ailurus_018580,Ailurus_007673,Ailurus_027062,
GO:BP	positive regulation of lamellipodium organization	GO:1902745	0.00750139	0.117096	7	36	Ailurus_018196,Ailurus_004409,Ailurus_004408,Ailurus_018698,Ailurus_000311,Ailurus_000309,Ailurus_000772,
GO:BP	cellular response to interferon-gamma	GO:0071346	0.0075111	0.117005	20	171	Ailurus_013776,Ailurus_021127,Ailurus_010462,Ailurus_018196,Ailurus_012628,Ailurus_005995,Ailurus_016870,Ailurus_000238,Ailurus_025533,Ailurus_016225,Ailurus_026214,Ailurus_012778,Ailurus_023896,Ailurus_025457,Ailurus_025458,Ailurus_000120,Ailurus_018783,Ailurus_016132,Ailurus_026102,Ailurus_021996,
GO:BP	membrane organization	GO:0061024	0.0075944	0.118058	79	929	Ailurus_016805,Ailurus_013776,Ailurus_002610,Ailurus_012652,Ailurus_020281,Ailurus_002648,Ailurus_002639,Ailurus_020269,Ailurus_018196,Ailurus_020480,Ailurus_023167,Ailurus_025102,Ailurus_026693,Ailurus_022088,Ailurus_002698,Ailurus_005995,Ailurus_000236,Ailurus_000031,Ailurus_000030,Ailurus_016814,Ailurus_009082,Ailurus_024438,Ailurus_027387,Ailurus_027110,Ailurus_008872,Ailurus_008861,Ailurus_0…
GO:BP	regulation of protein modification process	GO:0031399	0.00759977	0.117898	153	1962	Ailurus_019084,Ailurus_002610,Ailurus_022249,Ailurus_012652,Ailurus_012892,Ailurus_020276,Ailurus_002648,Ailurus_022215,Ailurus_003970,Ailurus_023311,Ailurus_025978,Ailurus_013960,Ailurus_013965,Ailurus_000409,Ailurus_000643,Ailurus_018196,Ailurus_002609,Ailurus_001516,Ailurus_022650,Ailurus_019010,Ailurus_000665,Ailurus_013955,Ailurus_023754,Ailurus_004409,Ailurus_004408,Ailurus_025102,Ailurus_0…
GO:BP	negative regulation of adaptive immune response based on somatic recombination of immune receptors built from immunoglobulin superfamily domains	GO:0002823	0.00765234	0.11847	8	45	Ailurus_023318,Ailurus_008650,Ailurus_024520,Ailurus_024522,Ailurus_024956,Ailurus_024955,Ailurus_006550,Ailurus_001930,
GO:BP	defense response to Gram-negative bacterium	GO:0050829	0.00772462	0.119343	12	84	Ailurus_000643,Ailurus_010085,Ailurus_004612,Ailurus_012967,Ailurus_010119,Ailurus_024970,Ailurus_000771,Ailurus_025457,Ailurus_004120,Ailurus_008750,Ailurus_007420,Ailurus_000609,
GO:BP	negative regulation of calcium-mediated signaling	GO:0050849	0.00775038	0.119496	5	20	Ailurus_020487,Ailurus_016279,Ailurus_000561,Ailurus_016753,Ailurus_018701,
GO:BP	negative regulation of inflammatory response to antigenic stimulus	GO:0002862	0.00775038	0.119496	5	20	Ailurus_000685,Ailurus_000684,Ailurus_001187,Ailurus_024532,Ailurus_012778,
GO:BP	regulation of production of miRNAs involved in gene silencing by miRNA	GO:1903798	0.00775038	0.119496	5	20	Ailurus_005700,Ailurus_023191,Ailurus_023192,Ailurus_014966,Ailurus_006550,
GO:BP	regulation of mitochondrial membrane permeability involved in apoptotic process	GO:1902108	0.0077613	0.118933	10	64	Ailurus_023167,Ailurus_025102,Ailurus_022088,Ailurus_008402,Ailurus_008290,Ailurus_012737,Ailurus_012736,Ailurus_015848,Ailurus_026599,Ailurus_027042,
GO:BP	negative regulation of programmed cell death	GO:0043069	0.007779	0.118962	87	1039	Ailurus_000685,Ailurus_000684,Ailurus_023323,Ailurus_026836,Ailurus_022249,Ailurus_012892,Ailurus_022215,Ailurus_003970,Ailurus_013994,Ailurus_006195,Ailurus_013960,Ailurus_006185,Ailurus_010462,Ailurus_013947,Ailurus_002609,Ailurus_001516,Ailurus_023754,Ailurus_023167,Ailurus_000288,Ailurus_025123,Ailurus_018826,Ailurus_017977,Ailurus_016870,Ailurus_002668,Ailurus_009082,Ailurus_016827,Ailurus_0…
GO:BP	cellular localization	GO:0051641	0.00785842	0.118728	266	3605	Ailurus_015700,Ailurus_015702,Ailurus_020053,Ailurus_024898,Ailurus_026834,Ailurus_016805,Ailurus_013776,Ailurus_023339,Ailurus_026849,Ailurus_019085,Ailurus_002610,Ailurus_012894,Ailurus_012652,Ailurus_010473,Ailurus_012892,Ailurus_020281,Ailurus_020276,Ailurus_021365,Ailurus_002639,Ailurus_022227,Ailurus_000643,Ailurus_006185,Ailurus_020269,Ailurus_025957,Ailurus_022682,Ailurus_018196,Ailurus_0…
GO:BP	negative regulation of extrinsic apoptotic signaling pathway	GO:2001237	0.00793307	0.119616	15	116	Ailurus_000685,Ailurus_000684,Ailurus_023323,Ailurus_022249,Ailurus_003970,Ailurus_000288,Ailurus_018658,Ailurus_006038,Ailurus_018689,Ailurus_012737,Ailurus_012736,Ailurus_010329,Ailurus_004120,Ailurus_026599,Ailurus_013030,
GO:BP	negative regulation of immune effector process	GO:0002698	0.00798594	0.120172	16	127	Ailurus_023318,Ailurus_014819,Ailurus_020014,Ailurus_008650,Ailurus_027148,Ailurus_024532,Ailurus_024520,Ailurus_024522,Ailurus_024734,Ailurus_024956,Ailurus_024955,Ailurus_010329,Ailurus_025458,Ailurus_006550,Ailurus_025059,Ailurus_001930,
GO:BP	regulation of protein processing	GO:0070613	0.00798594	0.120172	16	127	Ailurus_026836,Ailurus_022251,Ailurus_027177,Ailurus_009144,Ailurus_024520,Ailurus_024522,Ailurus_012763,Ailurus_011400,Ailurus_017194,Ailurus_016753,Ailurus_004537,Ailurus_024105,Ailurus_026599,Ailurus_016539,Ailurus_018149,Ailurus_021996,
GO:BP	regulation of bone development	GO:1903010	0.00803006	0.120355	6	28	Ailurus_026883,Ailurus_008846,Ailurus_025374,Ailurus_023000,Ailurus_000609,Ailurus_017297,
GO:BP	negative regulation of cardiac muscle hypertrophy	GO:0010614	0.00803006	0.120355	6	28	Ailurus_022215,Ailurus_006185,Ailurus_022299,Ailurus_014730,Ailurus_017288,Ailurus_027042,
GO:BP	regulation of cysteine-type endopeptidase activity involved in apoptotic process	GO:0043281	0.00822151	0.122735	26	243	Ailurus_000685,Ailurus_000684,Ailurus_022249,Ailurus_006185,Ailurus_022650,Ailurus_023167,Ailurus_018826,Ailurus_018658,Ailurus_008846,Ailurus_024085,Ailurus_008872,Ailurus_021890,Ailurus_012737,Ailurus_012736,Ailurus_000302,Ailurus_025002,Ailurus_015648,Ailurus_025458,Ailurus_008750,Ailurus_025059,Ailurus_026599,Ailurus_013030,Ailurus_025004,Ailurus_016187,Ailurus_022623,Ailurus_021996,
GO:BP	negative regulation of signal transduction	GO:0009968	0.00829532	0.123592	107	1318	Ailurus_000685,Ailurus_000684,Ailurus_023323,Ailurus_012449,Ailurus_003942,Ailurus_022249,Ailurus_022214,Ailurus_022215,Ailurus_003970,Ailurus_009276,Ailurus_023311,Ailurus_020014,Ailurus_018196,Ailurus_002609,Ailurus_019010,Ailurus_020487,Ailurus_025344,Ailurus_000288,Ailurus_000286,Ailurus_018801,Ailurus_022285,Ailurus_012483,Ailurus_011397,Ailurus_002655,Ailurus_002681,Ailurus_002677,Ailurus_0…
GO:BP	glutathione metabolic process	GO:0006749	0.00835749	0.124272	9	55	Ailurus_000685,Ailurus_000684,Ailurus_013120,Ailurus_008221,Ailurus_018689,Ailurus_017030,Ailurus_017288,Ailurus_008339,Ailurus_027062,
GO:BP	negative regulation of muscle cell apoptotic process	GO:0010656	0.00835749	0.124272	9	55	Ailurus_003970,Ailurus_004202,Ailurus_019104,Ailurus_000194,Ailurus_003651,Ailurus_006550,Ailurus_025059,Ailurus_026599,Ailurus_012812,
GO:BP	negative regulation of cell activation	GO:0050866	0.00840537	0.124492	22	196	Ailurus_023318,Ailurus_000409,Ailurus_010462,Ailurus_022911,Ailurus_018633,Ailurus_008650,Ailurus_027148,Ailurus_024532,Ailurus_012778,Ailurus_024734,Ailurus_024956,Ailurus_024955,Ailurus_010329,Ailurus_016753,Ailurus_018701,Ailurus_004537,Ailurus_025458,Ailurus_015855,Ailurus_006550,Ailurus_001930,Ailurus_007496,Ailurus_022623,
GO:BP	negative regulation of nucleobase-containing compound metabolic process	GO:0045934	0.00852465	0.126011	117	1459	Ailurus_024898,Ailurus_019084,Ailurus_002648,Ailurus_022215,Ailurus_003970,Ailurus_013994,Ailurus_023311,Ailurus_025978,Ailurus_022227,Ailurus_020257,Ailurus_025946,Ailurus_022205,Ailurus_022650,Ailurus_020005,Ailurus_004409,Ailurus_004408,Ailurus_025344,Ailurus_018826,Ailurus_018828,Ailurus_000035,Ailurus_027521,Ailurus_012483,Ailurus_002663,Ailurus_012009,Ailurus_002655,Ailurus_021165,Ailurus_0…
GO:BP	phosphorus metabolic process	GO:0006793	0.00856687	0.126387	263	3567	Ailurus_000685,Ailurus_000684,Ailurus_024411,Ailurus_026836,Ailurus_002610,Ailurus_022249,Ailurus_012652,Ailurus_012892,Ailurus_025728,Ailurus_020276,Ailurus_002648,Ailurus_022213,Ailurus_022215,Ailurus_010007,Ailurus_003970,Ailurus_002639,Ailurus_023311,Ailurus_025973,Ailurus_025978,Ailurus_008378,Ailurus_020261,Ailurus_013960,Ailurus_000409,Ailurus_000643,Ailurus_008364,Ailurus_018196,Ailurus_0…
GO:BP	sulfur compound metabolic process	GO:0006790	0.00858996	0.126479	36	367	Ailurus_000685,Ailurus_000684,Ailurus_023314,Ailurus_020261,Ailurus_025703,Ailurus_000043,Ailurus_026447,Ailurus_013120,Ailurus_016600,Ailurus_009701,Ailurus_006674,Ailurus_015390,Ailurus_000902,Ailurus_027565,Ailurus_008234,Ailurus_008221,Ailurus_017110,Ailurus_018689,Ailurus_023404,Ailurus_024987,Ailurus_009366,Ailurus_000385,Ailurus_019629,Ailurus_004565,Ailurus_025280,Ailurus_026340,Ailurus_0…
GO:BP	peptide transport	GO:0015833	0.00871212	0.128027	142	1813	Ailurus_013776,Ailurus_023339,Ailurus_026849,Ailurus_022249,Ailurus_012892,Ailurus_021365,Ailurus_022215,Ailurus_000643,Ailurus_010462,Ailurus_022682,Ailurus_018196,Ailurus_002609,Ailurus_002607,Ailurus_000660,Ailurus_002603,Ailurus_020487,Ailurus_023754,Ailurus_018810,Ailurus_018811,Ailurus_004401,Ailurus_000039,Ailurus_002698,Ailurus_004420,Ailurus_014686,Ailurus_018802,Ailurus_005989,Ailurus_0…
GO:BP	positive regulation of acute inflammatory response	GO:0002675	0.00874608	0.128276	7	37	Ailurus_026852,Ailurus_022931,Ailurus_024793,Ailurus_022373,Ailurus_011400,Ailurus_024105,Ailurus_005462,
GO:BP	skeletal muscle fiber development	GO:0048741	0.00875022	0.128087	8	46	Ailurus_000685,Ailurus_000684,Ailurus_010473,Ailurus_025946,Ailurus_004409,Ailurus_004408,Ailurus_006074,Ailurus_018285,
GO:BP	protein localization to extracellular region	GO:0071692	0.00879305	0.128464	56	626	Ailurus_026849,Ailurus_022249,Ailurus_022215,Ailurus_000643,Ailurus_010462,Ailurus_002603,Ailurus_020487,Ailurus_023754,Ailurus_004401,Ailurus_000039,Ailurus_005989,Ailurus_026852,Ailurus_014643,Ailurus_022911,Ailurus_018639,Ailurus_016225,Ailurus_025371,Ailurus_006038,Ailurus_008234,Ailurus_006040,Ailurus_016078,Ailurus_006236,Ailurus_027177,Ailurus_008650,Ailurus_006250,Ailurus_006492,Ailurus_0…
GO:BP	substrate adhesion-dependent cell spreading	GO:0034446	0.00890163	0.129798	13	96	Ailurus_009010,Ailurus_006195,Ailurus_018196,Ailurus_027387,Ailurus_000311,Ailurus_009153,Ailurus_000309,Ailurus_023026,Ailurus_023027,Ailurus_015633,Ailurus_004742,Ailurus_026161,Ailurus_015489,
GO:BP	organic substance transport	GO:0071702	0.00893822	0.13008	196	2590	Ailurus_008172,Ailurus_010016,Ailurus_013776,Ailurus_023339,Ailurus_026849,Ailurus_002615,Ailurus_022249,Ailurus_012652,Ailurus_012892,Ailurus_021365,Ailurus_022215,Ailurus_003970,Ailurus_012879,Ailurus_000643,Ailurus_008369,Ailurus_010462,Ailurus_022682,Ailurus_018196,Ailurus_022205,Ailurus_020480,Ailurus_002609,Ailurus_002607,Ailurus_000660,Ailurus_002603,Ailurus_020487,Ailurus_023754,Ailurus_0…
GO:BP	regulation of protein maturation	GO:1903317	0.00924021	0.134215	16	129	Ailurus_026836,Ailurus_022251,Ailurus_027177,Ailurus_009144,Ailurus_024520,Ailurus_024522,Ailurus_012763,Ailurus_011400,Ailurus_017194,Ailurus_016753,Ailurus_004537,Ailurus_024105,Ailurus_026599,Ailurus_016539,Ailurus_018149,Ailurus_021996,
GO:BP	CD4-positive, alpha-beta T cell differentiation	GO:0043367	0.00929041	0.134684	12	86	Ailurus_027105,Ailurus_008650,Ailurus_008672,Ailurus_025825,Ailurus_024734,Ailurus_010559,Ailurus_024956,Ailurus_024955,Ailurus_025458,Ailurus_006550,Ailurus_027096,Ailurus_001930,
GO:BP	regulation of chemokine production	GO:0032642	0.00929041	0.134684	12	86	Ailurus_010462,Ailurus_026852,Ailurus_021890,Ailurus_008650,Ailurus_018689,Ailurus_024532,Ailurus_024970,Ailurus_022308,Ailurus_000771,Ailurus_025458,Ailurus_000147,Ailurus_008750,
GO:BP	positive regulation of cell motility	GO:2000147	0.00932183	0.134621	50	549	Ailurus_003942,Ailurus_002614,Ailurus_022215,Ailurus_023314,Ailurus_006195,Ailurus_013960,Ailurus_022650,Ailurus_004409,Ailurus_004408,Ailurus_025102,Ailurus_000288,Ailurus_026694,Ailurus_014686,Ailurus_025533,Ailurus_005700,Ailurus_018658,Ailurus_027387,Ailurus_003172,Ailurus_004202,Ailurus_014029,Ailurus_018601,Ailurus_006037,Ailurus_008685,Ailurus_005170,Ailurus_000716,Ailurus_009528,Ailurus_0…
GO:BP	regulation of response to cytokine stimulus	GO:0060759	0.00933719	0.134584	19	163	Ailurus_022249,Ailurus_016827,Ailurus_018658,Ailurus_017305,Ailurus_000081,Ailurus_026214,Ailurus_008224,Ailurus_016078,Ailurus_021890,Ailurus_018689,Ailurus_014730,Ailurus_012737,Ailurus_012736,Ailurus_000111,Ailurus_008750,Ailurus_026599,Ailurus_016539,Ailurus_007268,Ailurus_021991,
GO:BP	muscle system process	GO:0003012	0.00934524	0.134443	46	497	Ailurus_020053,Ailurus_026834,Ailurus_019085,Ailurus_022215,Ailurus_024891,Ailurus_006185,Ailurus_010462,Ailurus_001516,Ailurus_020487,Ailurus_004409,Ailurus_004408,Ailurus_000043,Ailurus_010076,Ailurus_022299,Ailurus_018666,Ailurus_018639,Ailurus_018624,Ailurus_021890,Ailurus_023809,Ailurus_017110,Ailurus_022948,Ailurus_014730,Ailurus_008074,Ailurus_014969,Ailurus_024961,Ailurus_018709,Ailurus_0…
GO:BP	negative regulation of cell death	GO:0060548	0.00940016	0.134975	96	1171	Ailurus_000685,Ailurus_000684,Ailurus_023323,Ailurus_026836,Ailurus_022249,Ailurus_012892,Ailurus_022215,Ailurus_003970,Ailurus_013994,Ailurus_006195,Ailurus_013960,Ailurus_006185,Ailurus_010462,Ailurus_013947,Ailurus_020480,Ailurus_002609,Ailurus_001516,Ailurus_023754,Ailurus_023167,Ailurus_000288,Ailurus_025123,Ailurus_018826,Ailurus_017977,Ailurus_016870,Ailurus_002668,Ailurus_009082,Ailurus_0…
GO:BP	regulation of CD4-positive, alpha-beta T cell differentiation	GO:0043370	0.00940062	0.134724	9	56	Ailurus_008650,Ailurus_008672,Ailurus_025825,Ailurus_024734,Ailurus_024956,Ailurus_024955,Ailurus_025458,Ailurus_006550,Ailurus_001930,
GO:BP	negative regulation of cell communication	GO:0010648	0.00944006	0.135032	116	1450	Ailurus_000685,Ailurus_000684,Ailurus_023323,Ailurus_012449,Ailurus_003942,Ailurus_022249,Ailurus_022214,Ailurus_022215,Ailurus_003970,Ailurus_009276,Ailurus_023311,Ailurus_020014,Ailurus_018196,Ailurus_002609,Ailurus_019010,Ailurus_020487,Ailurus_025344,Ailurus_000288,Ailurus_000286,Ailurus_000039,Ailurus_018801,Ailurus_022285,Ailurus_012483,Ailurus_011397,Ailurus_002655,Ailurus_002681,Ailurus_0…
GO:BP	negative regulation of secretion	GO:0051048	0.00952285	0.135958	27	258	Ailurus_022215,Ailurus_003970,Ailurus_006185,Ailurus_010462,Ailurus_023754,Ailurus_000039,Ailurus_000037,Ailurus_018639,Ailurus_016225,Ailurus_006038,Ailurus_019116,Ailurus_000716,Ailurus_016078,Ailurus_027177,Ailurus_022931,Ailurus_014730,Ailurus_024532,Ailurus_008266,Ailurus_008267,Ailurus_025458,Ailurus_015868,Ailurus_015633,Ailurus_006550,Ailurus_025277,Ailurus_016539,Ailurus_023716,Ailurus_0…
GO:BP	regulation of gene expression	GO:0010468	0.00953644	0.135894	328	4540	Ailurus_000685,Ailurus_000684,Ailurus_024898,Ailurus_026836,Ailurus_010029,Ailurus_022251,Ailurus_019084,Ailurus_002610,Ailurus_022249,Ailurus_012652,Ailurus_012892,Ailurus_021365,Ailurus_002648,Ailurus_022213,Ailurus_022215,Ailurus_000224,Ailurus_003970,Ailurus_024891,Ailurus_009275,Ailurus_013994,Ailurus_023318,Ailurus_021373,Ailurus_022220,Ailurus_025978,Ailurus_022227,Ailurus_013965,Ailurus_0…
GO:BP	glycogen metabolic process	GO:0005977	0.00955455	0.135895	11	76	Ailurus_012497,Ailurus_010284,Ailurus_001586,Ailurus_003153,Ailurus_018099,Ailurus_018702,Ailurus_012391,Ailurus_006542,Ailurus_027240,Ailurus_023977,Ailurus_027042,
GO:BP	cellular glucan metabolic process	GO:0006073	0.00955455	0.135895	11	76	Ailurus_012497,Ailurus_010284,Ailurus_001586,Ailurus_003153,Ailurus_018099,Ailurus_018702,Ailurus_012391,Ailurus_006542,Ailurus_027240,Ailurus_023977,Ailurus_027042,
GO:BP	glucan metabolic process	GO:0044042	0.00955455	0.135895	11	76	Ailurus_012497,Ailurus_010284,Ailurus_001586,Ailurus_003153,Ailurus_018099,Ailurus_018702,Ailurus_012391,Ailurus_006542,Ailurus_027240,Ailurus_023977,Ailurus_027042,
GO:BP	positive regulation of mast cell activation	GO:0033005	0.00958153	0.13551	6	29	Ailurus_000238,Ailurus_008650,Ailurus_024793,Ailurus_026113,Ailurus_027099,Ailurus_019679,
GO:BP	auditory receptor cell morphogenesis	GO:0002093	0.00958153	0.13551	6	29	Ailurus_023317,Ailurus_008210,Ailurus_015489,Ailurus_026120,Ailurus_021966,Ailurus_021965,
GO:BP	apoptotic process involved in development	GO:1902742	0.00958153	0.13551	6	29	Ailurus_019084,Ailurus_022215,Ailurus_006185,Ailurus_008210,Ailurus_014730,Ailurus_014126,
GO:BP	chronic inflammatory response	GO:0002544	0.00958153	0.13551	6	29	Ailurus_000643,Ailurus_016078,Ailurus_024532,Ailurus_025002,Ailurus_026161,Ailurus_025004,
GO:BP	positive regulation of triglyceride metabolic process	GO:0090208	0.00958153	0.13551	6	29	Ailurus_008234,Ailurus_000140,Ailurus_019629,Ailurus_025277,Ailurus_023961,Ailurus_023964,
GO:BP	positive regulation of lamellipodium assembly	GO:0010592	0.00958153	0.13551	6	29	Ailurus_018196,Ailurus_004409,Ailurus_004408,Ailurus_000311,Ailurus_000309,Ailurus_000772,
GO:BP	negative regulation of muscle hypertrophy	GO:0014741	0.00958153	0.13551	6	29	Ailurus_022215,Ailurus_006185,Ailurus_022299,Ailurus_014730,Ailurus_017288,Ailurus_027042,
GO:BP	regulation of cytokine-mediated signaling pathway	GO:0001959	0.00958838	0.133846	18	152	Ailurus_022249,Ailurus_016827,Ailurus_018658,Ailurus_017305,Ailurus_000081,Ailurus_026214,Ailurus_008224,Ailurus_016078,Ailurus_018689,Ailurus_014730,Ailurus_012737,Ailurus_012736,Ailurus_000111,Ailurus_008750,Ailurus_026599,Ailurus_016539,Ailurus_007268,Ailurus_021991,
GO:BP	positive regulation of membrane permeability	GO:1905710	0.009624	0.134094	10	66	Ailurus_023167,Ailurus_025102,Ailurus_008402,Ailurus_008290,Ailurus_012737,Ailurus_012736,Ailurus_015848,Ailurus_027833,Ailurus_006391,Ailurus_027042,
GO:BP	regulation of production of small RNA involved in gene silencing by RNA	GO:0070920	0.00963936	0.13406	5	21	Ailurus_005700,Ailurus_023191,Ailurus_023192,Ailurus_014966,Ailurus_006550,
GO:BP	cytoplasmic sequestering of transcription factor	GO:0042994	0.00963936	0.13406	5	21	Ailurus_020487,Ailurus_026959,Ailurus_024532,Ailurus_023947,Ailurus_023948,
GO:BP	autophagy of nucleus	GO:0044804	0.00963936	0.13406	5	21	Ailurus_018809,Ailurus_000300,Ailurus_002163,Ailurus_004583,Ailurus_018108,
GO:BP	multi-organism process	GO:0051704	0.0097078	0.134267	171	2234	Ailurus_023330,Ailurus_000685,Ailurus_000684,Ailurus_026836,Ailurus_010029,Ailurus_002615,Ailurus_002648,Ailurus_022215,Ailurus_021373,Ailurus_023311,Ailurus_022226,Ailurus_012630,Ailurus_020014,Ailurus_000643,Ailurus_007039,Ailurus_006185,Ailurus_010462,Ailurus_025957,Ailurus_018196,Ailurus_022205,Ailurus_024836,Ailurus_001516,Ailurus_000665,Ailurus_012628,Ailurus_020002,Ailurus_000288,Ailurus_0…
GO:BP	mast cell degranulation	GO:0043303	0.00996163	0.137525	8	47	Ailurus_000238,Ailurus_008650,Ailurus_024793,Ailurus_024994,Ailurus_025458,Ailurus_026161,Ailurus_025003,Ailurus_019679,
GO:BP	positive regulation of B cell proliferation	GO:0030890	0.00996163	0.137525	8	47	Ailurus_012892,Ailurus_005989,Ailurus_006038,Ailurus_002754,Ailurus_000771,Ailurus_000147,Ailurus_001930,Ailurus_007224,
GO:BP	regulation of macromolecule metabolic process	GO:0060255	0.00996231	0.137032	435	6156	Ailurus_000685,Ailurus_000684,Ailurus_024898,Ailurus_026836,Ailurus_010029,Ailurus_022251,Ailurus_019084,Ailurus_002610,Ailurus_022249,Ailurus_012652,Ailurus_010473,Ailurus_012892,Ailurus_020276,Ailurus_021365,Ailurus_002648,Ailurus_022213,Ailurus_022215,Ailurus_000224,Ailurus_003970,Ailurus_024891,Ailurus_009275,Ailurus_013994,Ailurus_023318,Ailurus_021373,Ailurus_022220,Ailurus_023311,Ailurus_0…
GO:BP	positive regulation of protein metabolic process	GO:0051247	0.0099781	0.136999	140	1792	Ailurus_026836,Ailurus_022249,Ailurus_012652,Ailurus_012892,Ailurus_020276,Ailurus_002648,Ailurus_022215,Ailurus_003970,Ailurus_013960,Ailurus_013965,Ailurus_000409,Ailurus_000643,Ailurus_006185,Ailurus_018196,Ailurus_022205,Ailurus_002609,Ailurus_001516,Ailurus_022650,Ailurus_019010,Ailurus_000665,Ailurus_023754,Ailurus_004409,Ailurus_004408,Ailurus_023167,Ailurus_000288,Ailurus_000286,Ailurus_0…
GO:BP	phosphate-containing compound metabolic process	GO:0006796	0.0100277	0.137429	261	3549	Ailurus_000685,Ailurus_000684,Ailurus_024411,Ailurus_026836,Ailurus_002610,Ailurus_022249,Ailurus_012652,Ailurus_012892,Ailurus_025728,Ailurus_020276,Ailurus_002648,Ailurus_022213,Ailurus_022215,Ailurus_010007,Ailurus_003970,Ailurus_002639,Ailurus_023311,Ailurus_025973,Ailurus_025978,Ailurus_020261,Ailurus_013960,Ailurus_000409,Ailurus_000643,Ailurus_008364,Ailurus_018196,Ailurus_001516,Ailurus_0…
GO:BP	regulation of JNK cascade	GO:0046328	0.0100989	0.138153	24	223	Ailurus_022249,Ailurus_020276,Ailurus_000409,Ailurus_018196,Ailurus_017305,Ailurus_004202,Ailurus_026498,Ailurus_008811,Ailurus_010788,Ailurus_016078,Ailurus_018689,Ailurus_014732,Ailurus_022373,Ailurus_008275,Ailurus_000771,Ailurus_006948,Ailurus_004742,Ailurus_012102,Ailurus_025080,Ailurus_008750,Ailurus_025049,Ailurus_018770,Ailurus_018582,Ailurus_019657,
GO:BP	adherens junction assembly	GO:0034333	0.0101358	0.138406	7	38	Ailurus_010473,Ailurus_004202,Ailurus_008888,Ailurus_023026,Ailurus_023027,Ailurus_026306,Ailurus_000112,
GO:BP	negative regulation of interferon-gamma production	GO:0032689	0.0101358	0.138406	7	38	Ailurus_027148,Ailurus_024532,Ailurus_012778,Ailurus_025825,Ailurus_016753,Ailurus_025458,Ailurus_006550,
GO:BP	nucleobase-containing compound biosynthetic process	GO:0034654	0.010166	0.138316	285	3905	Ailurus_000685,Ailurus_000684,Ailurus_024898,Ailurus_026836,Ailurus_010029,Ailurus_019084,Ailurus_002610,Ailurus_022249,Ailurus_010473,Ailurus_012892,Ailurus_002648,Ailurus_022215,Ailurus_000224,Ailurus_003970,Ailurus_024891,Ailurus_009275,Ailurus_013994,Ailurus_023318,Ailurus_021373,Ailurus_022220,Ailurus_023311,Ailurus_025973,Ailurus_025978,Ailurus_022227,Ailurus_008378,Ailurus_013965,Ailurus_0…
GO:BP	activation of innate immune response	GO:0002218	0.0102093	0.138655	20	176	Ailurus_000294,Ailurus_016870,Ailurus_002668,Ailurus_026852,Ailurus_018658,Ailurus_017305,Ailurus_027105,Ailurus_027148,Ailurus_024793,Ailurus_000771,Ailurus_025002,Ailurus_025458,Ailurus_000147,Ailurus_008750,Ailurus_024186,Ailurus_025004,Ailurus_005678,Ailurus_018582,Ailurus_011924,Ailurus_019657,
GO:BP	negative regulation of leukocyte activation	GO:0002695	0.0102093	0.138655	20	176	Ailurus_023318,Ailurus_000409,Ailurus_010462,Ailurus_022911,Ailurus_018633,Ailurus_008650,Ailurus_027148,Ailurus_024532,Ailurus_012778,Ailurus_024734,Ailurus_024956,Ailurus_024955,Ailurus_010329,Ailurus_016753,Ailurus_018701,Ailurus_025458,Ailurus_006550,Ailurus_001930,Ailurus_007496,Ailurus_022623,
GO:BP	negative regulation of apoptotic process	GO:0043066	0.0102328	0.138475	85	1023	Ailurus_000685,Ailurus_000684,Ailurus_023323,Ailurus_026836,Ailurus_022249,Ailurus_012892,Ailurus_022215,Ailurus_003970,Ailurus_013994,Ailurus_006195,Ailurus_013960,Ailurus_006185,Ailurus_010462,Ailurus_013947,Ailurus_002609,Ailurus_001516,Ailurus_023754,Ailurus_023167,Ailurus_000288,Ailurus_025123,Ailurus_018826,Ailurus_017977,Ailurus_016870,Ailurus_002668,Ailurus_009082,Ailurus_012223,Ailurus_0…
GO:BP	negative regulation of GO:MF	GO:0044092	0.0102428	0.138361	95	1161	Ailurus_000685,Ailurus_000684,Ailurus_026836,Ailurus_012892,Ailurus_022215,Ailurus_022222,Ailurus_023314,Ailurus_025978,Ailurus_000409,Ailurus_006185,Ailurus_010462,Ailurus_022650,Ailurus_000665,Ailurus_013955,Ailurus_020487,Ailurus_004409,Ailurus_004408,Ailurus_018826,Ailurus_026205,Ailurus_000039,Ailurus_000037,Ailurus_014686,Ailurus_011397,Ailurus_002681,Ailurus_016827,Ailurus_026283,Ailurus_0…
GO:BP	heterocycle biosynthetic process	GO:0018130	0.010276	0.13856	290	3980	Ailurus_000685,Ailurus_000684,Ailurus_024898,Ailurus_026836,Ailurus_010029,Ailurus_019084,Ailurus_002610,Ailurus_022249,Ailurus_010473,Ailurus_012892,Ailurus_002648,Ailurus_022215,Ailurus_000224,Ailurus_003970,Ailurus_024891,Ailurus_009275,Ailurus_013994,Ailurus_023318,Ailurus_021373,Ailurus_022220,Ailurus_023311,Ailurus_025973,Ailurus_025978,Ailurus_022227,Ailurus_008378,Ailurus_013965,Ailurus_0…
GO:BP	regulation of stress-activated MAPK cascade	GO:0032872	0.0103819	0.139738	28	272	Ailurus_022249,Ailurus_020276,Ailurus_000409,Ailurus_018196,Ailurus_005700,Ailurus_017305,Ailurus_004202,Ailurus_026498,Ailurus_008811,Ailurus_010788,Ailurus_016078,Ailurus_018689,Ailurus_014732,Ailurus_022373,Ailurus_008275,Ailurus_000771,Ailurus_006948,Ailurus_004742,Ailurus_012102,Ailurus_006550,Ailurus_025080,Ailurus_008750,Ailurus_025049,Ailurus_004383,Ailurus_018770,Ailurus_013030,Ailurus_0…
GO:BP	regulation of muscle cell differentiation	GO:0051147	0.0104052	0.13881	21	188	Ailurus_012652,Ailurus_022215,Ailurus_003970,Ailurus_025946,Ailurus_018196,Ailurus_013947,Ailurus_018810,Ailurus_018811,Ailurus_004409,Ailurus_004408,Ailurus_022299,Ailurus_017176,Ailurus_008650,Ailurus_023809,Ailurus_000194,Ailurus_004742,Ailurus_008752,Ailurus_025059,Ailurus_023977,Ailurus_017288,Ailurus_027042,
GO:BP	negative regulation of macromolecule metabolic process	GO:0010605	0.0104251	0.138829	219	2935	Ailurus_000685,Ailurus_000684,Ailurus_024898,Ailurus_019084,Ailurus_012892,Ailurus_002648,Ailurus_022215,Ailurus_003970,Ailurus_013994,Ailurus_023318,Ailurus_023311,Ailurus_023314,Ailurus_025978,Ailurus_022227,Ailurus_020257,Ailurus_025946,Ailurus_020014,Ailurus_000409,Ailurus_006185,Ailurus_010462,Ailurus_022682,Ailurus_018196,Ailurus_022205,Ailurus_013947,Ailurus_003936,Ailurus_002607,Ailurus_0…
GO:BP	response to chemical	GO:0042221	0.010474	0.139233	344	4787	Ailurus_023330,Ailurus_000685,Ailurus_000684,Ailurus_023323,Ailurus_024411,Ailurus_024898,Ailurus_026836,Ailurus_026834,Ailurus_010029,Ailurus_013776,Ailurus_026849,Ailurus_002615,Ailurus_003942,Ailurus_019084,Ailurus_019082,Ailurus_002610,Ailurus_022249,Ailurus_012652,Ailurus_012892,Ailurus_021127,Ailurus_022215,Ailurus_003970,Ailurus_013994,Ailurus_020051,Ailurus_023318,Ailurus_021373,Ailurus_0…
GO:BP	lamellipodium organization	GO:0097581	0.0105276	0.1397	13	98	Ailurus_006195,Ailurus_018196,Ailurus_004409,Ailurus_004408,Ailurus_005586,Ailurus_018698,Ailurus_000311,Ailurus_000309,Ailurus_000772,Ailurus_018706,Ailurus_023026,Ailurus_023027,Ailurus_007224,
GO:BP	regulation of toll-like receptor signaling pathway	GO:0034121	0.0105391	0.139606	9	57	Ailurus_012652,Ailurus_006412,Ailurus_000771,Ailurus_000111,Ailurus_000147,Ailurus_025059,Ailurus_024186,Ailurus_000609,Ailurus_011924,
GO:BP	positive regulation of phagocytosis	GO:0050766	0.0106744	0.14115	10	67	Ailurus_016805,Ailurus_002610,Ailurus_000031,Ailurus_000030,Ailurus_004612,Ailurus_024793,Ailurus_000311,Ailurus_001674,Ailurus_000309,Ailurus_008750,
GO:BP	regulation of B cell proliferation	GO:0030888	0.0106744	0.14115	10	67	Ailurus_012892,Ailurus_000409,Ailurus_005989,Ailurus_006038,Ailurus_024532,Ailurus_002754,Ailurus_000771,Ailurus_000147,Ailurus_001930,Ailurus_007224,
GO:BP	negative regulation of T cell activation	GO:0050868	0.0107331	0.141428	15	120	Ailurus_023318,Ailurus_010462,Ailurus_008650,Ailurus_024532,Ailurus_012778,Ailurus_024734,Ailurus_024956,Ailurus_024955,Ailurus_010329,Ailurus_016753,Ailurus_025458,Ailurus_006550,Ailurus_001930,Ailurus_007496,Ailurus_022623,
GO:BP	positive regulation of immune response	GO:0050778	0.0107865	0.141884	57	646	Ailurus_022251,Ailurus_002610,Ailurus_022249,Ailurus_012652,Ailurus_014819,Ailurus_018196,Ailurus_000660,Ailurus_000294,Ailurus_026694,Ailurus_010085,Ailurus_016870,Ailurus_005989,Ailurus_002668,Ailurus_000238,Ailurus_026852,Ailurus_016827,Ailurus_004612,Ailurus_018658,Ailurus_017305,Ailurus_027105,Ailurus_008865,Ailurus_026243,Ailurus_027177,Ailurus_008650,Ailurus_016016,Ailurus_027148,Ailurus_0…
GO:BP	negative regulation of cellular metabolic process	GO:0031324	0.0108098	0.141943	201	2675	Ailurus_000685,Ailurus_000684,Ailurus_024898,Ailurus_026836,Ailurus_019084,Ailurus_012892,Ailurus_002648,Ailurus_022215,Ailurus_003970,Ailurus_013994,Ailurus_023311,Ailurus_023314,Ailurus_025978,Ailurus_022227,Ailurus_020257,Ailurus_025946,Ailurus_000409,Ailurus_006185,Ailurus_008364,Ailurus_022205,Ailurus_003936,Ailurus_002607,Ailurus_022650,Ailurus_000665,Ailurus_013955,Ailurus_020005,Ailurus_0…
GO:BP	regulation of stress-activated protein kinase signaling cascade	GO:0070302	0.0108782	0.142591	28	273	Ailurus_022249,Ailurus_020276,Ailurus_000409,Ailurus_018196,Ailurus_005700,Ailurus_017305,Ailurus_004202,Ailurus_026498,Ailurus_008811,Ailurus_010788,Ailurus_016078,Ailurus_018689,Ailurus_014732,Ailurus_022373,Ailurus_008275,Ailurus_000771,Ailurus_006948,Ailurus_004742,Ailurus_012102,Ailurus_006550,Ailurus_025080,Ailurus_008750,Ailurus_025049,Ailurus_004383,Ailurus_018770,Ailurus_013030,Ailurus_0…
GO:BP	positive regulation of JUN kinase activity	GO:0043507	0.0110924	0.145147	12	88	Ailurus_022249,Ailurus_020276,Ailurus_000409,Ailurus_017305,Ailurus_004202,Ailurus_016078,Ailurus_022373,Ailurus_008275,Ailurus_000771,Ailurus_025080,Ailurus_018770,Ailurus_019657,
GO:BP	negative regulation of myeloid cell differentiation	GO:0045638	0.0110924	0.145147	12	88	Ailurus_009275,Ailurus_013947,Ailurus_020092,Ailurus_025533,Ailurus_004202,Ailurus_019174,Ailurus_009153,Ailurus_025825,Ailurus_006086,Ailurus_008921,Ailurus_000609,Ailurus_017248,
GO:BP	endosomal transport	GO:0016197	0.0111719	0.14568	25	237	Ailurus_020269,Ailurus_018196,Ailurus_018810,Ailurus_018811,Ailurus_002698,Ailurus_014686,Ailurus_012223,Ailurus_000016,Ailurus_014280,Ailurus_008829,Ailurus_008210,Ailurus_000512,Ailurus_009367,Ailurus_010797,Ailurus_019375,Ailurus_018701,Ailurus_015442,Ailurus_018928,Ailurus_021072,Ailurus_021071,Ailurus_000137,Ailurus_018795,Ailurus_018794,Ailurus_018764,Ailurus_015495,
GO:BP	regulation of nitrogen compound metabolic process	GO:0051171	0.0112171	0.146016	401	5651	Ailurus_000685,Ailurus_000684,Ailurus_024898,Ailurus_026836,Ailurus_010029,Ailurus_022251,Ailurus_019084,Ailurus_002610,Ailurus_022249,Ailurus_012652,Ailurus_010473,Ailurus_012892,Ailurus_020276,Ailurus_002648,Ailurus_022215,Ailurus_000224,Ailurus_003970,Ailurus_024891,Ailurus_009275,Ailurus_013994,Ailurus_023318,Ailurus_021373,Ailurus_022220,Ailurus_023311,Ailurus_023314,Ailurus_025978,Ailurus_0…
GO:BP	mast cell activation involved in immune response	GO:0002279	0.0112932	0.146753	8	48	Ailurus_000238,Ailurus_008650,Ailurus_024793,Ailurus_024994,Ailurus_025458,Ailurus_026161,Ailurus_025003,Ailurus_019679,
GO:BP	negative regulation of protein maturation	GO:1903318	0.0112932	0.146753	8	48	Ailurus_009144,Ailurus_024520,Ailurus_024522,Ailurus_017194,Ailurus_016753,Ailurus_004537,Ailurus_026599,Ailurus_016539,
GO:BP	negative regulation of protein processing	GO:0010955	0.0112932	0.146753	8	48	Ailurus_009144,Ailurus_024520,Ailurus_024522,Ailurus_017194,Ailurus_016753,Ailurus_004537,Ailurus_026599,Ailurus_016539,
GO:BP	regulation of interferon-beta production	GO:0032648	0.0112932	0.146753	8	48	Ailurus_012652,Ailurus_020014,Ailurus_027105,Ailurus_000771,Ailurus_000111,Ailurus_000147,Ailurus_008750,Ailurus_004583,
GO:BP	negative regulation of interleukin-1 production	GO:0032692	0.0113352	0.146288	6	30	Ailurus_018689,Ailurus_024532,Ailurus_000340,Ailurus_006550,Ailurus_025059,Ailurus_016539,
GO:BP	enzyme linked receptor protein signaling pathway	GO:0007167	0.0114055	0.146944	94	1152	Ailurus_024896,Ailurus_003942,Ailurus_021127,Ailurus_022215,Ailurus_003970,Ailurus_023318,Ailurus_023311,Ailurus_013960,Ailurus_018196,Ailurus_013947,Ailurus_003936,Ailurus_023167,Ailurus_026694,Ailurus_022076,Ailurus_016870,Ailurus_012483,Ailurus_009057,Ailurus_011397,Ailurus_002655,Ailurus_000016,Ailurus_015390,Ailurus_005575,Ailurus_017305,Ailurus_008865,Ailurus_026243,Ailurus_004202,Ailurus_0…
GO:BP	positive regulation of cell-substrate adhesion	GO:0010811	0.0114099	0.146748	16	132	Ailurus_023314,Ailurus_013960,Ailurus_018196,Ailurus_022650,Ailurus_027387,Ailurus_004202,Ailurus_000311,Ailurus_009153,Ailurus_000309,Ailurus_011899,Ailurus_015633,Ailurus_015855,Ailurus_026161,Ailurus_015489,Ailurus_013030,Ailurus_007268,
GO:BP	macroautophagy	GO:0016236	0.0115404	0.148173	30	299	Ailurus_022222,Ailurus_002698,Ailurus_018809,Ailurus_012223,Ailurus_003153,Ailurus_018622,Ailurus_014026,Ailurus_008829,Ailurus_008212,Ailurus_024942,Ailurus_019104,Ailurus_006236,Ailurus_018679,Ailurus_018681,Ailurus_018680,Ailurus_016925,Ailurus_023218,Ailurus_011211,Ailurus_000512,Ailurus_000300,Ailurus_018928,Ailurus_026981,Ailurus_000137,Ailurus_010823,Ailurus_003228,Ailurus_002163,Ailurus_0…
GO:BP	positive regulation of neuron death	GO:1901216	0.0115418	0.147939	15	121	Ailurus_023311,Ailurus_018196,Ailurus_002603,Ailurus_004409,Ailurus_004408,Ailurus_002655,Ailurus_021165,Ailurus_008872,Ailurus_014730,Ailurus_017194,Ailurus_016753,Ailurus_013493,Ailurus_018770,Ailurus_027042,Ailurus_027047,
GO:BP	sprouting angiogenesis	GO:0002040	0.0115418	0.147939	15	121	Ailurus_003942,Ailurus_022215,Ailurus_013960,Ailurus_025946,Ailurus_018196,Ailurus_013947,Ailurus_019010,Ailurus_004202,Ailurus_021890,Ailurus_024532,Ailurus_009153,Ailurus_003651,Ailurus_027449,Ailurus_013030,Ailurus_025257,
GO:BP	cell growth	GO:0016049	0.0115484	0.147521	52	582	Ailurus_026836,Ailurus_012892,Ailurus_003970,Ailurus_024891,Ailurus_013994,Ailurus_018196,Ailurus_008395,Ailurus_022088,Ailurus_026205,Ailurus_022299,Ailurus_022265,Ailurus_026244,Ailurus_004202,Ailurus_014029,Ailurus_026214,Ailurus_024946,Ailurus_000735,Ailurus_001415,Ailurus_023218,Ailurus_000311,Ailurus_026965,Ailurus_009398,Ailurus_009153,Ailurus_008256,Ailurus_012737,Ailurus_012736,Ailurus_0…
GO:BP	negative regulation of extrinsic apoptotic signaling pathway via death domain receptors	GO:1902042	0.0116796	0.148945	7	39	Ailurus_000685,Ailurus_000684,Ailurus_022249,Ailurus_000288,Ailurus_018658,Ailurus_004120,Ailurus_026599,
GO:BP	response to lipid	GO:0033993	0.0117162	0.149159	96	1181	Ailurus_000685,Ailurus_000684,Ailurus_010029,Ailurus_026849,Ailurus_022215,Ailurus_003970,Ailurus_013994,Ailurus_021373,Ailurus_023311,Ailurus_006185,Ailurus_010462,Ailurus_025957,Ailurus_022682,Ailurus_022205,Ailurus_003936,Ailurus_001990,Ailurus_022091,Ailurus_026694,Ailurus_018828,Ailurus_000035,Ailurus_010085,Ailurus_025564,Ailurus_016870,Ailurus_002668,Ailurus_026852,Ailurus_025533,Ailurus_0…
GO:BP	regulation of cellular protein metabolic process	GO:0032268	0.0117491	0.149325	207	2768	Ailurus_000685,Ailurus_000684,Ailurus_026836,Ailurus_019084,Ailurus_002610,Ailurus_022249,Ailurus_012652,Ailurus_012892,Ailurus_020276,Ailurus_002648,Ailurus_022215,Ailurus_003970,Ailurus_023311,Ailurus_023314,Ailurus_025978,Ailurus_013960,Ailurus_013965,Ailurus_020257,Ailurus_000409,Ailurus_000643,Ailurus_006185,Ailurus_018196,Ailurus_022205,Ailurus_002609,Ailurus_001516,Ailurus_003936,Ailurus_0…
GO:BP	regulation of insulin receptor signaling pathway	GO:0046626	0.0118096	0.149841	10	68	Ailurus_026214,Ailurus_000716,Ailurus_019569,Ailurus_006040,Ailurus_000735,Ailurus_012976,Ailurus_024956,Ailurus_024955,Ailurus_008752,Ailurus_027042,
GO:BP	regulation of cellular biosynthetic process	GO:0031326	0.0118736	0.150399	285	3917	Ailurus_024898,Ailurus_026836,Ailurus_010029,Ailurus_019084,Ailurus_002610,Ailurus_022249,Ailurus_010473,Ailurus_012892,Ailurus_002648,Ailurus_022215,Ailurus_000224,Ailurus_003970,Ailurus_024891,Ailurus_009275,Ailurus_013994,Ailurus_023318,Ailurus_021373,Ailurus_022220,Ailurus_023311,Ailurus_025978,Ailurus_022227,Ailurus_013965,Ailurus_020257,Ailurus_025946,Ailurus_000409,Ailurus_008364,Ailurus_0…
GO:BP	positive regulation of mononuclear cell proliferation	GO:0032946	0.0119479	0.148835	17	144	Ailurus_012892,Ailurus_018825,Ailurus_005989,Ailurus_018658,Ailurus_006038,Ailurus_018018,Ailurus_008679,Ailurus_002754,Ailurus_000771,Ailurus_000188,Ailurus_025458,Ailurus_000147,Ailurus_008750,Ailurus_023961,Ailurus_001930,Ailurus_007268,Ailurus_007224,
GO:BP	regulation of cell morphogenesis	GO:0022604	0.0121165	0.145398	49	544	Ailurus_026836,Ailurus_006195,Ailurus_018196,Ailurus_008395,Ailurus_002602,Ailurus_000288,Ailurus_016870,Ailurus_015970,Ailurus_022265,Ailurus_025533,Ailurus_005700,Ailurus_027387,Ailurus_026244,Ailurus_026243,Ailurus_004202,Ailurus_010788,Ailurus_024946,Ailurus_008679,Ailurus_018698,Ailurus_021263,Ailurus_001415,Ailurus_023218,Ailurus_000311,Ailurus_024994,Ailurus_009398,Ailurus_009153,Ailurus_0…
GO:BP	negative regulation of metabolic process	GO:0009892	0.0122243	0.146458	234	3166	Ailurus_000685,Ailurus_000684,Ailurus_024898,Ailurus_026836,Ailurus_019084,Ailurus_012892,Ailurus_002648,Ailurus_022215,Ailurus_003970,Ailurus_013994,Ailurus_023318,Ailurus_023311,Ailurus_023314,Ailurus_025978,Ailurus_022227,Ailurus_020257,Ailurus_025946,Ailurus_020014,Ailurus_000409,Ailurus_006185,Ailurus_008364,Ailurus_010462,Ailurus_022682,Ailurus_018196,Ailurus_022205,Ailurus_013947,Ailurus_0…
GO:BP	positive regulation of cell migration	GO:0030335	0.0125661	0.150314	48	532	Ailurus_003942,Ailurus_002614,Ailurus_022215,Ailurus_006195,Ailurus_013960,Ailurus_022650,Ailurus_004409,Ailurus_004408,Ailurus_025102,Ailurus_000288,Ailurus_026694,Ailurus_014686,Ailurus_025533,Ailurus_018658,Ailurus_027387,Ailurus_003172,Ailurus_004202,Ailurus_014029,Ailurus_018601,Ailurus_006037,Ailurus_008685,Ailurus_005170,Ailurus_000716,Ailurus_009528,Ailurus_008679,Ailurus_008888,Ailurus_0…
GO:BP	exocytic process	GO:0140029	0.0126513	0.151093	11	79	Ailurus_013776,Ailurus_020269,Ailurus_016814,Ailurus_027572,Ailurus_008210,Ailurus_016279,Ailurus_024793,Ailurus_026161,Ailurus_009812,Ailurus_008358,Ailurus_027047,
GO:BP	response to antibiotic	GO:0046677	0.0127015	0.151452	44	480	Ailurus_023330,Ailurus_000685,Ailurus_000684,Ailurus_019084,Ailurus_022205,Ailurus_003936,Ailurus_002603,Ailurus_001990,Ailurus_022091,Ailurus_025121,Ailurus_026694,Ailurus_024085,Ailurus_004202,Ailurus_005555,Ailurus_018689,Ailurus_022703,Ailurus_014730,Ailurus_022113,Ailurus_011211,Ailurus_025825,Ailurus_024970,Ailurus_012737,Ailurus_012736,Ailurus_008270,Ailurus_000771,Ailurus_024961,Ailurus_0…
GO:BP	mast cell mediated immunity	GO:0002448	0.0127516	0.151808	8	49	Ailurus_000238,Ailurus_008650,Ailurus_024793,Ailurus_024994,Ailurus_025458,Ailurus_026161,Ailurus_025003,Ailurus_019679,
GO:BP	negative regulation of adaptive immune response	GO:0002820	0.0127516	0.151808	8	49	Ailurus_023318,Ailurus_008650,Ailurus_024520,Ailurus_024522,Ailurus_024956,Ailurus_024955,Ailurus_006550,Ailurus_001930,
GO:BP	inner ear auditory receptor cell differentiation	GO:0042491	0.0127516	0.151808	8	49	Ailurus_022215,Ailurus_023317,Ailurus_013947,Ailurus_008210,Ailurus_015489,Ailurus_026120,Ailurus_021966,Ailurus_021965,
GO:BP	negative regulation of intracellular signal transduction	GO:1902532	0.0128413	0.152154	54	612	Ailurus_000685,Ailurus_000684,Ailurus_009276,Ailurus_023311,Ailurus_020014,Ailurus_002609,Ailurus_019010,Ailurus_020487,Ailurus_018801,Ailurus_011397,Ailurus_026283,Ailurus_027387,Ailurus_026498,Ailurus_004233,Ailurus_026214,Ailurus_019107,Ailurus_000716,Ailurus_024942,Ailurus_019569,Ailurus_000735,Ailurus_021890,Ailurus_008218,Ailurus_006250,Ailurus_018689,Ailurus_016279,Ailurus_021268,Ailurus_0…
GO:BP	negative regulation of signaling	GO:0023057	0.0129677	0.15341	115	1452	Ailurus_000685,Ailurus_000684,Ailurus_023323,Ailurus_012449,Ailurus_003942,Ailurus_022249,Ailurus_022214,Ailurus_022215,Ailurus_003970,Ailurus_009276,Ailurus_023311,Ailurus_020014,Ailurus_018196,Ailurus_002609,Ailurus_019010,Ailurus_020487,Ailurus_025344,Ailurus_000288,Ailurus_000286,Ailurus_000039,Ailurus_018801,Ailurus_022285,Ailurus_012483,Ailurus_011397,Ailurus_002655,Ailurus_002681,Ailurus_0…
GO:BP	plasma membrane invagination	GO:0099024	0.0130337	0.153949	10	69	Ailurus_016805,Ailurus_002610,Ailurus_018196,Ailurus_000031,Ailurus_000030,Ailurus_008861,Ailurus_027328,Ailurus_024793,Ailurus_009367,Ailurus_021996,
GO:BP	embryo implantation	GO:0007566	0.0130337	0.153949	10	69	Ailurus_021373,Ailurus_025957,Ailurus_022205,Ailurus_026694,Ailurus_000011,Ailurus_014029,Ailurus_026941,Ailurus_024968,Ailurus_004537,Ailurus_018151,
GO:BP	cellular carbohydrate metabolic process	GO:0044262	0.0130596	0.153773	28	277	Ailurus_023311,Ailurus_008364,Ailurus_000652,Ailurus_004409,Ailurus_004408,Ailurus_000039,Ailurus_012497,Ailurus_010284,Ailurus_011381,Ailurus_001586,Ailurus_003153,Ailurus_004202,Ailurus_006040,Ailurus_022748,Ailurus_016279,Ailurus_018099,Ailurus_000545,Ailurus_018702,Ailurus_012391,Ailurus_000126,Ailurus_002570,Ailurus_019629,Ailurus_026158,Ailurus_006542,Ailurus_027240,Ailurus_023977,Ailurus_0…
GO:BP	negative regulation of protein-containing complex assembly	GO:0031333	0.0130661	0.153608	16	134	Ailurus_018196,Ailurus_003936,Ailurus_023167,Ailurus_026205,Ailurus_027387,Ailurus_024942,Ailurus_023218,Ailurus_000772,Ailurus_000187,Ailurus_026306,Ailurus_016132,Ailurus_015489,Ailurus_026599,Ailurus_025043,Ailurus_006156,Ailurus_021996,
GO:BP	regulation of extrinsic apoptotic signaling pathway via death domain receptors	GO:1902041	0.0131226	0.154032	9	59	Ailurus_000685,Ailurus_000684,Ailurus_022249,Ailurus_000288,Ailurus_026205,Ailurus_018658,Ailurus_010329,Ailurus_004120,Ailurus_026599,
GO:BP	regulation of body fluid levels	GO:0050878	0.0131465	0.154072	43	468	Ailurus_020057,Ailurus_002639,Ailurus_006195,Ailurus_013965,Ailurus_018196,Ailurus_019010,Ailurus_000665,Ailurus_018810,Ailurus_018811,Ailurus_005706,Ailurus_027112,Ailurus_008865,Ailurus_026272,Ailurus_000097,Ailurus_018633,Ailurus_025133,Ailurus_008822,Ailurus_019107,Ailurus_000716,Ailurus_024942,Ailurus_018209,Ailurus_016279,Ailurus_024793,Ailurus_024522,Ailurus_011400,Ailurus_024956,Ailurus_0…
GO:BP	regulation of cellular metabolic process	GO:0031323	0.0131707	0.154115	420	5953	Ailurus_000685,Ailurus_000684,Ailurus_024898,Ailurus_026836,Ailurus_010029,Ailurus_023339,Ailurus_019084,Ailurus_002610,Ailurus_022249,Ailurus_012652,Ailurus_010473,Ailurus_012892,Ailurus_020276,Ailurus_002648,Ailurus_022215,Ailurus_000224,Ailurus_003970,Ailurus_024891,Ailurus_009275,Ailurus_013994,Ailurus_023318,Ailurus_021373,Ailurus_022220,Ailurus_022222,Ailurus_023311,Ailurus_023314,Ailurus_0…
GO:BP	lymph node development	GO:0048535	0.0133037	0.15543	6	31	Ailurus_006195,Ailurus_018658,Ailurus_014732,Ailurus_022373,Ailurus_023888,Ailurus_025011,
GO:BP	response to peptide hormone	GO:0043434	0.0133195	0.155373	49	547	Ailurus_025946,Ailurus_022205,Ailurus_003936,Ailurus_000665,Ailurus_001990,Ailurus_004401,Ailurus_018828,Ailurus_000011,Ailurus_008846,Ailurus_008865,Ailurus_026243,Ailurus_026214,Ailurus_019116,Ailurus_000716,Ailurus_019569,Ailurus_006040,Ailurus_000735,Ailurus_010713,Ailurus_018679,Ailurus_018681,Ailurus_018680,Ailurus_018689,Ailurus_024532,Ailurus_024970,Ailurus_012976,Ailurus_024956,Ailurus_0…
GO:BP	regulation of oxidoreductase activity	GO:0051341	0.0133889	0.155941	13	101	Ailurus_010462,Ailurus_018826,Ailurus_008846,Ailurus_004202,Ailurus_012728,Ailurus_000716,Ailurus_018689,Ailurus_000311,Ailurus_002725,Ailurus_000309,Ailurus_025458,Ailurus_026506,Ailurus_014126,
GO:BP	positive regulation of protein modification process	GO:0031401	0.0136538	0.157805	105	1314	Ailurus_022249,Ailurus_012652,Ailurus_012892,Ailurus_020276,Ailurus_002648,Ailurus_022215,Ailurus_003970,Ailurus_013960,Ailurus_013965,Ailurus_000409,Ailurus_000643,Ailurus_018196,Ailurus_002609,Ailurus_001516,Ailurus_019010,Ailurus_000665,Ailurus_023754,Ailurus_004409,Ailurus_004408,Ailurus_000288,Ailurus_000286,Ailurus_012497,Ailurus_004420,Ailurus_002655,Ailurus_000031,Ailurus_000030,Ailurus_0…
GO:BP	myotube differentiation	GO:0014902	0.0139617	0.161116	16	135	Ailurus_000685,Ailurus_000684,Ailurus_012652,Ailurus_010473,Ailurus_022215,Ailurus_025946,Ailurus_018810,Ailurus_018811,Ailurus_004409,Ailurus_004408,Ailurus_017176,Ailurus_008650,Ailurus_023809,Ailurus_006074,Ailurus_018285,Ailurus_008752,
GO:BP	positive regulation of cellular metabolic process	GO:0031325	0.0140123	0.161453	253	3456	Ailurus_024898,Ailurus_026836,Ailurus_010029,Ailurus_019084,Ailurus_002610,Ailurus_022249,Ailurus_012652,Ailurus_010473,Ailurus_012892,Ailurus_020276,Ailurus_002648,Ailurus_022215,Ailurus_003970,Ailurus_024891,Ailurus_009275,Ailurus_013994,Ailurus_021373,Ailurus_022222,Ailurus_013960,Ailurus_013965,Ailurus_025946,Ailurus_000409,Ailurus_000643,Ailurus_006185,Ailurus_018196,Ailurus_022205,Ailurus_0…
GO:BP	negative regulation of cellular macromolecule biosynthetic process	GO:2000113	0.0142398	0.163823	116	1471	Ailurus_024898,Ailurus_019084,Ailurus_002648,Ailurus_022215,Ailurus_003970,Ailurus_013994,Ailurus_025978,Ailurus_022227,Ailurus_020257,Ailurus_025946,Ailurus_022205,Ailurus_003936,Ailurus_022650,Ailurus_020005,Ailurus_004409,Ailurus_004408,Ailurus_025344,Ailurus_018826,Ailurus_018828,Ailurus_000035,Ailurus_027521,Ailurus_012483,Ailurus_002663,Ailurus_012009,Ailurus_002655,Ailurus_000031,Ailurus_0…
GO:BP	negative regulation of phosphorylation	GO:0042326	0.0142626	0.163835	48	536	Ailurus_012892,Ailurus_023311,Ailurus_025978,Ailurus_000409,Ailurus_022650,Ailurus_000665,Ailurus_013955,Ailurus_004409,Ailurus_004408,Ailurus_000039,Ailurus_014686,Ailurus_012483,Ailurus_011397,Ailurus_026283,Ailurus_027387,Ailurus_026498,Ailurus_004233,Ailurus_026214,Ailurus_024942,Ailurus_019569,Ailurus_000735,Ailurus_021890,Ailurus_006250,Ailurus_018689,Ailurus_021268,Ailurus_021267,Ailurus_0…
GO:BP	cellular response to insulin stimulus	GO:0032869	0.0142757	0.163735	28	279	Ailurus_025946,Ailurus_022205,Ailurus_003936,Ailurus_004401,Ailurus_018828,Ailurus_008865,Ailurus_026243,Ailurus_026214,Ailurus_000716,Ailurus_019569,Ailurus_006040,Ailurus_000735,Ailurus_018679,Ailurus_018681,Ailurus_018680,Ailurus_018689,Ailurus_012976,Ailurus_024956,Ailurus_024955,Ailurus_024961,Ailurus_008752,Ailurus_025277,Ailurus_006391,Ailurus_017297,Ailurus_023961,Ailurus_023964,Ailurus_0…
GO:BP	positive regulation of cell-cell adhesion	GO:0022409	0.0142757	0.163735	28	279	Ailurus_016805,Ailurus_012652,Ailurus_006195,Ailurus_018196,Ailurus_000288,Ailurus_018825,Ailurus_005989,Ailurus_018658,Ailurus_018018,Ailurus_008679,Ailurus_008650,Ailurus_024532,Ailurus_025825,Ailurus_024734,Ailurus_024956,Ailurus_024955,Ailurus_006081,Ailurus_000188,Ailurus_025458,Ailurus_025422,Ailurus_024105,Ailurus_004373,Ailurus_008750,Ailurus_026343,Ailurus_026345,Ailurus_023961,Ailurus_0…
GO:BP	positive regulation of p38MAPK cascade	GO:1900745	0.0143175	0.163716	5	23	Ailurus_008811,Ailurus_006948,Ailurus_006550,Ailurus_025049,Ailurus_013030,
GO:BP	response to mitochondrial depolarisation	GO:0098780	0.0143175	0.163716	5	23	Ailurus_012223,Ailurus_024942,Ailurus_019104,Ailurus_023218,Ailurus_016187,
GO:BP	negative regulation of cardiocyte differentiation	GO:1905208	0.0143175	0.163716	5	23	Ailurus_013947,Ailurus_022299,Ailurus_004742,Ailurus_017288,Ailurus_027042,
GO:BP	negative regulation of chemokine production	GO:0032682	0.0143175	0.163716	5	23	Ailurus_010462,Ailurus_021890,Ailurus_018689,Ailurus_024532,Ailurus_025458,
GO:BP	pH reduction	GO:0045851	0.0143432	0.163018	8	50	Ailurus_008377,Ailurus_005995,Ailurus_004612,Ailurus_018679,Ailurus_018681,Ailurus_018680,Ailurus_020152,Ailurus_017297,
GO:BP	myotube cell development	GO:0014904	0.0143432	0.163018	8	50	Ailurus_000685,Ailurus_000684,Ailurus_010473,Ailurus_025946,Ailurus_004409,Ailurus_004408,Ailurus_006074,Ailurus_018285,
GO:BP	interferon-beta production	GO:0032608	0.0143432	0.163018	8	50	Ailurus_012652,Ailurus_020014,Ailurus_027105,Ailurus_000771,Ailurus_000111,Ailurus_000147,Ailurus_008750,Ailurus_004583,
GO:BP	mast cell activation	GO:0045576	0.0143505	0.162366	10	70	Ailurus_000238,Ailurus_008650,Ailurus_024793,Ailurus_024994,Ailurus_025458,Ailurus_026161,Ailurus_025003,Ailurus_026113,Ailurus_027099,Ailurus_019679,
GO:BP	positive regulation of osteoblast differentiation	GO:0045669	0.0143505	0.162366	10	70	Ailurus_009057,Ailurus_010119,Ailurus_024970,Ailurus_011405,Ailurus_000539,Ailurus_003651,Ailurus_023000,Ailurus_013030,Ailurus_000609,Ailurus_017297,
GO:BP	regulation of leukocyte apoptotic process	GO:2000106	0.0144646	0.163166	13	102	Ailurus_010462,Ailurus_009082,Ailurus_018658,Ailurus_006038,Ailurus_024532,Ailurus_024793,Ailurus_010329,Ailurus_008908,Ailurus_025458,Ailurus_024105,Ailurus_004373,Ailurus_023961,Ailurus_001930,
GO:BP	mitochondrial outer membrane permeabilization involved in programmed cell death	GO:1902686	0.0145777	0.164196	9	60	Ailurus_023167,Ailurus_025102,Ailurus_008402,Ailurus_008290,Ailurus_012737,Ailurus_012736,Ailurus_015848,Ailurus_027833,Ailurus_027042,
GO:BP	regulation of kinase activity	GO:0043549	0.0147212	0.165564	79	956	Ailurus_022249,Ailurus_012892,Ailurus_020276,Ailurus_003970,Ailurus_025978,Ailurus_000409,Ailurus_018196,Ailurus_001516,Ailurus_022650,Ailurus_000665,Ailurus_013955,Ailurus_000286,Ailurus_000039,Ailurus_014686,Ailurus_011397,Ailurus_002655,Ailurus_004612,Ailurus_005700,Ailurus_026283,Ailurus_017305,Ailurus_017324,Ailurus_004202,Ailurus_004233,Ailurus_026214,Ailurus_008811,Ailurus_006038,Ailurus_0…
GO:BP	negative regulation of DNA-binding transcription factor activity	GO:0043433	0.0148333	0.166576	18	159	Ailurus_020487,Ailurus_004409,Ailurus_004408,Ailurus_016827,Ailurus_017305,Ailurus_006038,Ailurus_021890,Ailurus_026959,Ailurus_024532,Ailurus_000771,Ailurus_016753,Ailurus_000111,Ailurus_006550,Ailurus_008750,Ailurus_025059,Ailurus_006156,Ailurus_023947,Ailurus_023948,
GO:BP	negative regulation of supramolecular fiber organization	GO:1902904	0.0149044	0.167125	16	136	Ailurus_023167,Ailurus_027387,Ailurus_018269,Ailurus_008685,Ailurus_008679,Ailurus_018698,Ailurus_009153,Ailurus_000772,Ailurus_000187,Ailurus_026306,Ailurus_026974,Ailurus_015855,Ailurus_016132,Ailurus_015489,Ailurus_025043,Ailurus_021996,
GO:BP	regulation of endopeptidase activity	GO:0052548	0.0149978	0.167922	38	407	Ailurus_000685,Ailurus_000684,Ailurus_022249,Ailurus_023314,Ailurus_006185,Ailurus_022650,Ailurus_023167,Ailurus_018826,Ailurus_018658,Ailurus_008846,Ailurus_024085,Ailurus_008872,Ailurus_021890,Ailurus_006236,Ailurus_010713,Ailurus_009144,Ailurus_012737,Ailurus_012736,Ailurus_000302,Ailurus_022308,Ailurus_025002,Ailurus_015648,Ailurus_004537,Ailurus_025458,Ailurus_012359,Ailurus_009814,Ailurus_0…
GO:BP	regulation of GO:CC organization	GO:0051128	0.0150602	0.16837	205	2756	Ailurus_015702,Ailurus_000685,Ailurus_000684,Ailurus_026836,Ailurus_026834,Ailurus_016805,Ailurus_022250,Ailurus_019084,Ailurus_002610,Ailurus_012652,Ailurus_012892,Ailurus_020281,Ailurus_002648,Ailurus_022215,Ailurus_003970,Ailurus_024891,Ailurus_002639,Ailurus_006195,Ailurus_013965,Ailurus_007039,Ailurus_006185,Ailurus_025957,Ailurus_018196,Ailurus_013947,Ailurus_008395,Ailurus_003936,Ailurus_0…
GO:BP	lamellipodium assembly	GO:0030032	0.0151039	0.168608	11	81	Ailurus_018196,Ailurus_004409,Ailurus_004408,Ailurus_005586,Ailurus_000311,Ailurus_000309,Ailurus_000772,Ailurus_018706,Ailurus_023026,Ailurus_023027,Ailurus_007224,
GO:BP	regulation of biosynthetic process	GO:0009889	0.0151947	0.16937	290	4011	Ailurus_024898,Ailurus_026836,Ailurus_010029,Ailurus_019084,Ailurus_002610,Ailurus_022249,Ailurus_010473,Ailurus_012892,Ailurus_002648,Ailurus_022215,Ailurus_000224,Ailurus_003970,Ailurus_024891,Ailurus_009275,Ailurus_013994,Ailurus_023318,Ailurus_021373,Ailurus_022220,Ailurus_023311,Ailurus_025978,Ailurus_022227,Ailurus_013965,Ailurus_020257,Ailurus_025946,Ailurus_000409,Ailurus_008364,Ailurus_0…
GO:BP	negative regulation of nitrogen compound metabolic process	GO:0051172	0.015254	0.16978	188	2509	Ailurus_000685,Ailurus_000684,Ailurus_024898,Ailurus_019084,Ailurus_012892,Ailurus_002648,Ailurus_022215,Ailurus_003970,Ailurus_013994,Ailurus_023311,Ailurus_023314,Ailurus_025978,Ailurus_022227,Ailurus_020257,Ailurus_025946,Ailurus_000409,Ailurus_006185,Ailurus_022205,Ailurus_003936,Ailurus_002607,Ailurus_022650,Ailurus_000665,Ailurus_013955,Ailurus_020005,Ailurus_004409,Ailurus_004408,Ailurus_0…
GO:BP	positive regulation of cellular protein metabolic process	GO:0032270	0.0152865	0.16989	132	1702	Ailurus_026836,Ailurus_022249,Ailurus_012652,Ailurus_012892,Ailurus_020276,Ailurus_002648,Ailurus_022215,Ailurus_003970,Ailurus_013960,Ailurus_013965,Ailurus_000409,Ailurus_000643,Ailurus_006185,Ailurus_018196,Ailurus_022205,Ailurus_002609,Ailurus_001516,Ailurus_022650,Ailurus_019010,Ailurus_000665,Ailurus_023754,Ailurus_004409,Ailurus_004408,Ailurus_023167,Ailurus_000288,Ailurus_000286,Ailurus_0…
GO:BP	GO:BP involved in symbiotic interaction	GO:0044403	0.0153582	0.170436	46	512	Ailurus_000685,Ailurus_000684,Ailurus_026836,Ailurus_002648,Ailurus_022215,Ailurus_022226,Ailurus_012630,Ailurus_000643,Ailurus_018196,Ailurus_022205,Ailurus_012628,Ailurus_020002,Ailurus_000288,Ailurus_000281,Ailurus_010085,Ailurus_022299,Ailurus_016870,Ailurus_000481,Ailurus_012223,Ailurus_025533,Ailurus_027575,Ailurus_004203,Ailurus_008829,Ailurus_008811,Ailurus_027148,Ailurus_009144,Ailurus_0…
GO:BP	positive regulation of leukocyte proliferation	GO:0070665	0.0153905	0.170542	17	148	Ailurus_012892,Ailurus_018825,Ailurus_005989,Ailurus_018658,Ailurus_006038,Ailurus_018018,Ailurus_008679,Ailurus_002754,Ailurus_000771,Ailurus_000188,Ailurus_025458,Ailurus_000147,Ailurus_008750,Ailurus_023961,Ailurus_001930,Ailurus_007268,Ailurus_007224,
GO:BP	transition metal ion homeostasis	GO:0055076	0.0153905	0.170542	17	148	Ailurus_019082,Ailurus_020487,Ailurus_022091,Ailurus_026205,Ailurus_001590,Ailurus_004612,Ailurus_006236,Ailurus_000707,Ailurus_018209,Ailurus_004060,Ailurus_002753,Ailurus_016753,Ailurus_025002,Ailurus_015678,Ailurus_026583,Ailurus_025004,Ailurus_017297,
GO:BP	postsynaptic signal transduction	GO:0098926	0.0154992	0.171242	6	32	Ailurus_000097,Ailurus_000096,Ailurus_000716,Ailurus_018709,Ailurus_023016,Ailurus_017235,
GO:BP	response to peptide	GO:1901652	0.0157498	0.173755	54	619	Ailurus_022215,Ailurus_021373,Ailurus_025946,Ailurus_022205,Ailurus_003936,Ailurus_000665,Ailurus_001990,Ailurus_004401,Ailurus_018828,Ailurus_000011,Ailurus_008846,Ailurus_008872,Ailurus_008865,Ailurus_026243,Ailurus_026214,Ailurus_019116,Ailurus_000716,Ailurus_019569,Ailurus_006040,Ailurus_000735,Ailurus_010713,Ailurus_018679,Ailurus_018681,Ailurus_018680,Ailurus_018689,Ailurus_024532,Ailurus_0…
GO:BP	lysosome localization	GO:0032418	0.0157643	0.173661	10	71	Ailurus_000238,Ailurus_008650,Ailurus_024793,Ailurus_024994,Ailurus_023879,Ailurus_026315,Ailurus_025458,Ailurus_026161,Ailurus_025003,Ailurus_019679,
GO:BP	negative regulation of protein secretion	GO:0050709	0.0158959	0.174854	16	137	Ailurus_010462,Ailurus_023754,Ailurus_000039,Ailurus_018639,Ailurus_016225,Ailurus_006038,Ailurus_027177,Ailurus_024532,Ailurus_008266,Ailurus_008267,Ailurus_025458,Ailurus_015633,Ailurus_006550,Ailurus_025277,Ailurus_016539,Ailurus_026188,
GO:BP	regulation of protein-containing complex assembly	GO:0043254	0.0160042	0.175789	44	487	Ailurus_015702,Ailurus_018196,Ailurus_003936,Ailurus_023167,Ailurus_000288,Ailurus_026205,Ailurus_014686,Ailurus_016870,Ailurus_011399,Ailurus_015970,Ailurus_027126,Ailurus_027387,Ailurus_026243,Ailurus_004202,Ailurus_000099,Ailurus_008685,Ailurus_024942,Ailurus_008679,Ailurus_018698,Ailurus_016279,Ailurus_023218,Ailurus_024973,Ailurus_012737,Ailurus_012736,Ailurus_000772,Ailurus_000187,Ailurus_0…
GO:BP	regulation of cardiac muscle cell differentiation	GO:2000725	0.0160745	0.176304	8	51	Ailurus_013947,Ailurus_022299,Ailurus_000194,Ailurus_004742,Ailurus_025059,Ailurus_023977,Ailurus_017288,Ailurus_027042,
GO:BP	obsolete cofactor catabolic process	GO:0051187	0.0160745	0.176304	8	51	Ailurus_000685,Ailurus_000684,Ailurus_018826,Ailurus_009081,Ailurus_008811,Ailurus_008270,Ailurus_027003,Ailurus_006108,
GO:BP	necrotic cell death	GO:0070265	0.0160745	0.176304	8	51	Ailurus_022249,Ailurus_010284,Ailurus_016827,Ailurus_018658,Ailurus_015868,Ailurus_000147,Ailurus_026599,Ailurus_011924,
GO:BP	T cell homeostasis	GO:0043029	0.0160745	0.176304	8	51	Ailurus_018658,Ailurus_006038,Ailurus_008679,Ailurus_019392,Ailurus_008908,Ailurus_025458,Ailurus_025011,Ailurus_023961,
GO:BP	regulation of erythrocyte differentiation	GO:0045646	0.0160745	0.176304	8	51	Ailurus_019084,Ailurus_009275,Ailurus_014029,Ailurus_019174,Ailurus_012737,Ailurus_012736,Ailurus_013493,Ailurus_015493,
GO:BP	regulation of GTPase activity	GO:0043087	0.0161042	0.175352	42	461	Ailurus_009049,Ailurus_020281,Ailurus_022222,Ailurus_000288,Ailurus_002698,Ailurus_011155,Ailurus_011397,Ailurus_000032,Ailurus_025772,Ailurus_015970,Ailurus_002677,Ailurus_025533,Ailurus_026283,Ailurus_017310,Ailurus_021810,Ailurus_004202,Ailurus_008210,Ailurus_006011,Ailurus_021263,Ailurus_000581,Ailurus_008275,Ailurus_011897,Ailurus_018701,Ailurus_000194,Ailurus_026306,Ailurus_015622,Ailurus_0…
GO:BP	endothelial cell development	GO:0001885	0.0161484	0.175579	9	61	Ailurus_000685,Ailurus_000684,Ailurus_002614,Ailurus_000288,Ailurus_000286,Ailurus_027387,Ailurus_022703,Ailurus_014730,Ailurus_012763,
GO:BP	regulation of substrate adhesion-dependent cell spreading	GO:1900024	0.0161484	0.175579	9	61	Ailurus_006195,Ailurus_018196,Ailurus_027387,Ailurus_000311,Ailurus_009153,Ailurus_000309,Ailurus_015633,Ailurus_026161,Ailurus_015489,
GO:BP	JNK cascade	GO:0007254	0.0161652	0.175255	26	257	Ailurus_022249,Ailurus_020276,Ailurus_000409,Ailurus_018196,Ailurus_022076,Ailurus_026283,Ailurus_017305,Ailurus_004202,Ailurus_026498,Ailurus_008811,Ailurus_010788,Ailurus_016078,Ailurus_018689,Ailurus_014732,Ailurus_022373,Ailurus_008275,Ailurus_000771,Ailurus_006948,Ailurus_004742,Ailurus_012102,Ailurus_025080,Ailurus_008750,Ailurus_025049,Ailurus_018770,Ailurus_018582,Ailurus_019657,
GO:BP	signal transduction in absence of ligand	GO:0038034	0.0164565	0.178156	11	82	Ailurus_023323,Ailurus_003970,Ailurus_022091,Ailurus_009082,Ailurus_018658,Ailurus_012737,Ailurus_012736,Ailurus_013493,Ailurus_000120,Ailurus_016187,Ailurus_027042,
GO:BP	extrinsic apoptotic signaling pathway in absence of ligand	GO:0097192	0.0164565	0.178156	11	82	Ailurus_023323,Ailurus_003970,Ailurus_022091,Ailurus_009082,Ailurus_018658,Ailurus_012737,Ailurus_012736,Ailurus_013493,Ailurus_000120,Ailurus_016187,Ailurus_027042,
GO:BP	positive regulation of GO:MF	GO:0044093	0.0165467	0.178619	146	1907	Ailurus_019085,Ailurus_002610,Ailurus_022249,Ailurus_009049,Ailurus_012652,Ailurus_012892,Ailurus_020281,Ailurus_020276,Ailurus_003970,Ailurus_022222,Ailurus_025946,Ailurus_000409,Ailurus_018196,Ailurus_020480,Ailurus_001516,Ailurus_022650,Ailurus_000665,Ailurus_012628,Ailurus_004409,Ailurus_004408,Ailurus_023167,Ailurus_000288,Ailurus_000286,Ailurus_002698,Ailurus_015521,Ailurus_011155,Ailurus_0…
GO:BP	regulation of developmental process	GO:0050793	0.0165769	0.178688	210	2836	Ailurus_000685,Ailurus_000684,Ailurus_026836,Ailurus_026834,Ailurus_003942,Ailurus_019084,Ailurus_002610,Ailurus_012652,Ailurus_022215,Ailurus_003970,Ailurus_009275,Ailurus_013994,Ailurus_023318,Ailurus_002639,Ailurus_023314,Ailurus_006195,Ailurus_013960,Ailurus_013965,Ailurus_020257,Ailurus_025946,Ailurus_000409,Ailurus_000643,Ailurus_007039,Ailurus_006185,Ailurus_010462,Ailurus_025957,Ailurus_0…
GO:BP	positive regulation of lymphocyte activation	GO:0051251	0.0166024	0.178708	29	295	Ailurus_016805,Ailurus_012892,Ailurus_018196,Ailurus_018825,Ailurus_005989,Ailurus_002668,Ailurus_018658,Ailurus_006038,Ailurus_018018,Ailurus_008679,Ailurus_008650,Ailurus_002754,Ailurus_025825,Ailurus_024734,Ailurus_024956,Ailurus_024955,Ailurus_006081,Ailurus_000771,Ailurus_000188,Ailurus_025458,Ailurus_025422,Ailurus_024105,Ailurus_000147,Ailurus_004373,Ailurus_008750,Ailurus_023961,Ailurus_0…
GO:BP	regulation of system process	GO:0044057	0.0167537	0.180078	56	648	Ailurus_020053,Ailurus_026834,Ailurus_019085,Ailurus_022215,Ailurus_003970,Ailurus_006185,Ailurus_010462,Ailurus_020480,Ailurus_001516,Ailurus_020487,Ailurus_004409,Ailurus_004408,Ailurus_023167,Ailurus_000288,Ailurus_000286,Ailurus_026694,Ailurus_022299,Ailurus_025533,Ailurus_018639,Ailurus_015135,Ailurus_016225,Ailurus_026243,Ailurus_004202,Ailurus_018624,Ailurus_019116,Ailurus_000716,Ailurus_0…
GO:BP	leukocyte homeostasis	GO:0001776	0.0168131	0.180459	13	104	Ailurus_000409,Ailurus_005989,Ailurus_009082,Ailurus_018658,Ailurus_008865,Ailurus_006038,Ailurus_008679,Ailurus_024793,Ailurus_019392,Ailurus_008908,Ailurus_025458,Ailurus_025011,Ailurus_023961,
GO:BP	viral life cycle	GO:0019058	0.0169096	0.181236	26	258	Ailurus_002648,Ailurus_022215,Ailurus_012630,Ailurus_018196,Ailurus_012628,Ailurus_020002,Ailurus_000288,Ailurus_000281,Ailurus_027575,Ailurus_004203,Ailurus_008829,Ailurus_009144,Ailurus_012778,Ailurus_001674,Ailurus_011211,Ailurus_023896,Ailurus_000512,Ailurus_018709,Ailurus_018928,Ailurus_025458,Ailurus_006550,Ailurus_009812,Ailurus_027099,Ailurus_000609,Ailurus_017049,Ailurus_021996,
GO:BP	toll-like receptor 3 signaling pathway	GO:0034138	0.0171431	0.181159	5	24	Ailurus_012652,Ailurus_002668,Ailurus_018658,Ailurus_025458,Ailurus_000147,
GO:BP	bone maturation	GO:0070977	0.0171431	0.181159	5	24	Ailurus_025728,Ailurus_002655,Ailurus_025374,Ailurus_021287,Ailurus_000609,
GO:BP	amyloid-beta clearance	GO:0097242	0.0171431	0.181159	5	24	Ailurus_002610,Ailurus_000031,Ailurus_000030,Ailurus_002681,Ailurus_005678,
GO:BP	triglyceride biosynthetic process	GO:0019432	0.0173229	0.18229	7	42	Ailurus_008234,Ailurus_004547,Ailurus_000140,Ailurus_019629,Ailurus_025277,Ailurus_023961,Ailurus_023964,
GO:BP	response to insulin	GO:0032868	0.0175071	0.183971	33	347	Ailurus_025946,Ailurus_022205,Ailurus_003936,Ailurus_001990,Ailurus_004401,Ailurus_018828,Ailurus_008865,Ailurus_026243,Ailurus_026214,Ailurus_019116,Ailurus_000716,Ailurus_019569,Ailurus_006040,Ailurus_000735,Ailurus_018679,Ailurus_018681,Ailurus_018680,Ailurus_018689,Ailurus_024532,Ailurus_012976,Ailurus_024956,Ailurus_024955,Ailurus_024961,Ailurus_008752,Ailurus_025277,Ailurus_006391,Ailurus_0…
GO:BP	regulation of pH	GO:0006885	0.0178403	0.187211	14	116	Ailurus_012879,Ailurus_008377,Ailurus_025564,Ailurus_005995,Ailurus_021191,Ailurus_004612,Ailurus_026237,Ailurus_018679,Ailurus_018681,Ailurus_018680,Ailurus_020152,Ailurus_005830,Ailurus_006391,Ailurus_017297,
GO:BP	regulation of muscle cell apoptotic process	GO:0010660	0.0178976	0.187551	11	83	Ailurus_003970,Ailurus_004202,Ailurus_019104,Ailurus_013885,Ailurus_018709,Ailurus_000194,Ailurus_003651,Ailurus_006550,Ailurus_025059,Ailurus_026599,Ailurus_012812,
GO:BP	regulation of mast cell activation	GO:0033003	0.0179517	0.187857	8	52	Ailurus_000238,Ailurus_008650,Ailurus_024793,Ailurus_025458,Ailurus_026161,Ailurus_026113,Ailurus_027099,Ailurus_019679,
GO:BP	defense response to fungus	GO:0050832	0.0179517	0.187857	8	52	Ailurus_000643,Ailurus_010085,Ailurus_014643,Ailurus_008811,Ailurus_025002,Ailurus_025004,Ailurus_025003,Ailurus_000609,
GO:BP	regulation of myeloid leukocyte differentiation	GO:0002761	0.0180309	0.188162	16	139	Ailurus_018828,Ailurus_026883,Ailurus_002655,Ailurus_025533,Ailurus_018658,Ailurus_012778,Ailurus_025825,Ailurus_024973,Ailurus_006086,Ailurus_000123,Ailurus_024105,Ailurus_008921,Ailurus_000609,Ailurus_017297,Ailurus_007268,Ailurus_017248,
GO:BP	Rho protein signal transduction	GO:0007266	0.0180309	0.188162	16	139	Ailurus_012652,Ailurus_024891,Ailurus_006195,Ailurus_018196,Ailurus_015970,Ailurus_017310,Ailurus_026243,Ailurus_026965,Ailurus_000580,Ailurus_011897,Ailurus_018783,Ailurus_026102,Ailurus_001930,Ailurus_023977,Ailurus_027051,Ailurus_019657,
GO:BP	positive regulation of hydrolase activity	GO:0051345	0.0180348	0.187681	64	759	Ailurus_019085,Ailurus_022249,Ailurus_009049,Ailurus_020281,Ailurus_022650,Ailurus_023167,Ailurus_000288,Ailurus_002698,Ailurus_015521,Ailurus_011155,Ailurus_011397,Ailurus_002655,Ailurus_000032,Ailurus_025772,Ailurus_015970,Ailurus_002677,Ailurus_025533,Ailurus_018658,Ailurus_008872,Ailurus_017310,Ailurus_021810,Ailurus_000098,Ailurus_000097,Ailurus_004202,Ailurus_008210,Ailurus_006011,Ailurus_0…
GO:BP	positive regulation of MAP kinase activity	GO:0043406	0.0180387	0.187463	29	297	Ailurus_022249,Ailurus_020276,Ailurus_003970,Ailurus_000409,Ailurus_001516,Ailurus_000286,Ailurus_005700,Ailurus_017305,Ailurus_004202,Ailurus_016078,Ailurus_022373,Ailurus_000580,Ailurus_009366,Ailurus_008275,Ailurus_000771,Ailurus_024961,Ailurus_006948,Ailurus_023026,Ailurus_023027,Ailurus_024105,Ailurus_025080,Ailurus_025049,Ailurus_004383,Ailurus_018770,Ailurus_013030,Ailurus_025003,Ailurus_0…
GO:BP	regulation of hydrolase activity	GO:0051336	0.0180943	0.187782	101	1272	Ailurus_000685,Ailurus_000684,Ailurus_026836,Ailurus_019085,Ailurus_022249,Ailurus_009049,Ailurus_010473,Ailurus_020281,Ailurus_022222,Ailurus_023314,Ailurus_006185,Ailurus_022650,Ailurus_013955,Ailurus_023167,Ailurus_000288,Ailurus_018826,Ailurus_002698,Ailurus_015521,Ailurus_011155,Ailurus_011397,Ailurus_002655,Ailurus_000032,Ailurus_025772,Ailurus_015970,Ailurus_002677,Ailurus_025533,Ailurus_0…
GO:BP	homeostasis of number of cells	GO:0048872	0.0183128	0.189787	30	310	Ailurus_019084,Ailurus_022215,Ailurus_009275,Ailurus_012630,Ailurus_000409,Ailurus_018826,Ailurus_005989,Ailurus_009082,Ailurus_018658,Ailurus_008865,Ailurus_014029,Ailurus_006038,Ailurus_008679,Ailurus_018209,Ailurus_024793,Ailurus_019174,Ailurus_019392,Ailurus_012737,Ailurus_012736,Ailurus_008270,Ailurus_013493,Ailurus_008908,Ailurus_025458,Ailurus_015493,Ailurus_025011,Ailurus_013030,Ailurus_0…
GO:BP	mitochondrial membrane organization	GO:0007006	0.0184441	0.190885	17	151	Ailurus_023167,Ailurus_025102,Ailurus_022088,Ailurus_000083,Ailurus_015578,Ailurus_008402,Ailurus_008290,Ailurus_012737,Ailurus_012736,Ailurus_026778,Ailurus_015848,Ailurus_027833,Ailurus_004359,Ailurus_026599,Ailurus_006391,Ailurus_017298,Ailurus_027042,
GO:BP	negative regulation of phosphorus metabolic process	GO:0010563	0.018697	0.193236	56	652	Ailurus_026836,Ailurus_012892,Ailurus_023311,Ailurus_025978,Ailurus_000409,Ailurus_022650,Ailurus_000665,Ailurus_013955,Ailurus_004409,Ailurus_004408,Ailurus_000039,Ailurus_014686,Ailurus_012483,Ailurus_011397,Ailurus_026283,Ailurus_027387,Ailurus_026498,Ailurus_004233,Ailurus_026214,Ailurus_019116,Ailurus_000716,Ailurus_024942,Ailurus_019569,Ailurus_000735,Ailurus_021890,Ailurus_006250,Ailurus_0…
GO:BP	regulation of RNA metabolic process	GO:0051252	0.0187677	0.193701	252	3464	Ailurus_024898,Ailurus_026836,Ailurus_010029,Ailurus_019084,Ailurus_002610,Ailurus_022249,Ailurus_010473,Ailurus_012892,Ailurus_002648,Ailurus_022215,Ailurus_000224,Ailurus_003970,Ailurus_024891,Ailurus_009275,Ailurus_013994,Ailurus_023318,Ailurus_021373,Ailurus_022220,Ailurus_025978,Ailurus_022227,Ailurus_013965,Ailurus_020257,Ailurus_025946,Ailurus_000409,Ailurus_006185,Ailurus_022205,Ailurus_0…
GO:BP	carbohydrate metabolic process	GO:0005975	0.0187711	0.193471	48	545	Ailurus_023311,Ailurus_008364,Ailurus_000652,Ailurus_004409,Ailurus_004408,Ailurus_000039,Ailurus_012497,Ailurus_012264,Ailurus_010284,Ailurus_011381,Ailurus_001586,Ailurus_024686,Ailurus_003153,Ailurus_004202,Ailurus_008685,Ailurus_024948,Ailurus_019569,Ailurus_006040,Ailurus_022748,Ailurus_016279,Ailurus_008284,Ailurus_018099,Ailurus_024984,Ailurus_000781,Ailurus_000545,Ailurus_000775,Ailurus_0…
GO:BP	humoral immune response	GO:0006959	0.0188257	0.193768	25	248	Ailurus_022251,Ailurus_022215,Ailurus_000643,Ailurus_022091,Ailurus_010085,Ailurus_004612,Ailurus_012967,Ailurus_027177,Ailurus_027148,Ailurus_012562,Ailurus_012778,Ailurus_024520,Ailurus_002754,Ailurus_024522,Ailurus_010329,Ailurus_025002,Ailurus_004373,Ailurus_025011,Ailurus_025004,Ailurus_025003,Ailurus_027096,Ailurus_018149,Ailurus_000609,Ailurus_017049,Ailurus_007443,
GO:BP	skeletal muscle tissue development	GO:0007519	0.0188271	0.193518	21	199	Ailurus_000685,Ailurus_000684,Ailurus_012652,Ailurus_010473,Ailurus_022215,Ailurus_025946,Ailurus_013947,Ailurus_024836,Ailurus_020005,Ailurus_004409,Ailurus_004408,Ailurus_012009,Ailurus_007747,Ailurus_024910,Ailurus_023809,Ailurus_014969,Ailurus_006074,Ailurus_024734,Ailurus_018285,Ailurus_012833,Ailurus_017298,
GO:BP	regulation of T cell proliferation	GO:0042129	0.0188473	0.193462	19	175	Ailurus_023318,Ailurus_010462,Ailurus_018825,Ailurus_005989,Ailurus_018658,Ailurus_018018,Ailurus_008679,Ailurus_008672,Ailurus_024532,Ailurus_012778,Ailurus_019392,Ailurus_024956,Ailurus_024955,Ailurus_010329,Ailurus_016753,Ailurus_000188,Ailurus_025458,Ailurus_008750,Ailurus_023961,
GO:BP	regulation of lipid kinase activity	GO:0043550	0.0188981	0.193718	10	73	Ailurus_018196,Ailurus_014686,Ailurus_002655,Ailurus_004202,Ailurus_019104,Ailurus_021890,Ailurus_010119,Ailurus_025825,Ailurus_019446,Ailurus_007224,
GO:BP	regulation of osteoclast differentiation	GO:0045670	0.0188981	0.193718	10	73	Ailurus_018828,Ailurus_026883,Ailurus_002655,Ailurus_025533,Ailurus_000123,Ailurus_024105,Ailurus_008921,Ailurus_000609,Ailurus_017297,Ailurus_007268,
GO:BP	aromatic compound biosynthetic process	GO:0019438	0.019061	0.194857	288	4000	Ailurus_000685,Ailurus_000684,Ailurus_024898,Ailurus_026836,Ailurus_010029,Ailurus_019084,Ailurus_002610,Ailurus_022249,Ailurus_010473,Ailurus_012892,Ailurus_002648,Ailurus_022215,Ailurus_000224,Ailurus_003970,Ailurus_024891,Ailurus_009275,Ailurus_013994,Ailurus_023318,Ailurus_021373,Ailurus_022220,Ailurus_023311,Ailurus_025973,Ailurus_025978,Ailurus_022227,Ailurus_008378,Ailurus_013965,Ailurus_0…
GO:BP	regulation of neuron death	GO:1901214	0.0190799	0.194786	35	375	Ailurus_000685,Ailurus_000684,Ailurus_023323,Ailurus_022249,Ailurus_023311,Ailurus_018196,Ailurus_002603,Ailurus_004409,Ailurus_004408,Ailurus_002655,Ailurus_021165,Ailurus_000028,Ailurus_008872,Ailurus_004202,Ailurus_008212,Ailurus_024942,Ailurus_008679,Ailurus_019104,Ailurus_006236,Ailurus_014730,Ailurus_024532,Ailurus_017194,Ailurus_016753,Ailurus_013493,Ailurus_015868,Ailurus_024105,Ailurus_0…
GO:BP	positive regulation of interleukin-6 production	GO:0032755	0.0194305	0.198096	11	84	Ailurus_016016,Ailurus_024793,Ailurus_024970,Ailurus_022308,Ailurus_000771,Ailurus_018709,Ailurus_000188,Ailurus_025458,Ailurus_015868,Ailurus_000147,Ailurus_008750,
GO:BP	negative regulation of cysteine-type endopeptidase activity involved in apoptotic process	GO:0043154	0.0194398	0.197923	13	106	Ailurus_000685,Ailurus_000684,Ailurus_006185,Ailurus_018826,Ailurus_008846,Ailurus_021890,Ailurus_012737,Ailurus_012736,Ailurus_000302,Ailurus_025059,Ailurus_026599,Ailurus_013030,Ailurus_022623,
GO:BP	positive regulation of ossification	GO:0045778	0.0194398	0.197923	13	106	Ailurus_009057,Ailurus_002655,Ailurus_020092,Ailurus_016007,Ailurus_010119,Ailurus_024970,Ailurus_011405,Ailurus_000539,Ailurus_003651,Ailurus_023000,Ailurus_013030,Ailurus_000609,Ailurus_017297,
GO:BP	p38MAPK cascade	GO:0038066	0.0195692	0.198703	7	43	Ailurus_002655,Ailurus_008811,Ailurus_006948,Ailurus_025458,Ailurus_006550,Ailurus_025049,Ailurus_013030,
GO:BP	membrane protein ectodomain proteolysis	GO:0006509	0.0195692	0.198703	7	43	Ailurus_006185,Ailurus_000081,Ailurus_009144,Ailurus_024532,Ailurus_009367,Ailurus_024105,Ailurus_018151,
GO:BP	regulation of lamellipodium assembly	GO:0010591	0.0195692	0.198703	7	43	Ailurus_018196,Ailurus_004409,Ailurus_004408,Ailurus_000311,Ailurus_000309,Ailurus_000772,Ailurus_018706,
GO:BP	toll-like receptor signaling pathway	GO:0002224	0.0198495	0.200736	15	129	Ailurus_012652,Ailurus_002668,Ailurus_018658,Ailurus_017305,Ailurus_006412,Ailurus_000771,Ailurus_025002,Ailurus_025458,Ailurus_000111,Ailurus_000147,Ailurus_025059,Ailurus_024186,Ailurus_025004,Ailurus_000609,Ailurus_011924,
GO:BP	response to interleukin-1	GO:0070555	0.0198927	0.200903	19	176	Ailurus_004409,Ailurus_004408,Ailurus_022091,Ailurus_026694,Ailurus_002668,Ailurus_012223,Ailurus_009073,Ailurus_025533,Ailurus_017305,Ailurus_018612,Ailurus_018843,Ailurus_016078,Ailurus_022373,Ailurus_025457,Ailurus_025458,Ailurus_000111,Ailurus_006550,Ailurus_008750,Ailurus_016539,
GO:BP	interleukin-10 production	GO:0032613	0.019981	0.201524	8	53	Ailurus_013947,Ailurus_024793,Ailurus_012778,Ailurus_000771,Ailurus_025458,Ailurus_008750,Ailurus_027096,Ailurus_017288,
GO:BP	epithelial cell development	GO:0002064	0.0201629	0.203086	26	262	Ailurus_000685,Ailurus_000684,Ailurus_002614,Ailurus_022215,Ailurus_013994,Ailurus_023317,Ailurus_008366,Ailurus_018196,Ailurus_013947,Ailurus_000288,Ailurus_000286,Ailurus_002655,Ailurus_027387,Ailurus_008210,Ailurus_022703,Ailurus_014730,Ailurus_026930,Ailurus_025825,Ailurus_012763,Ailurus_015895,Ailurus_017216,Ailurus_015489,Ailurus_026120,Ailurus_021966,Ailurus_021965,Ailurus_027042,
GO:BP	positive regulation of actin cytoskeleton reorganization	GO:2000251	0.0203148	0.204343	5	25	Ailurus_018196,Ailurus_016870,Ailurus_026243,Ailurus_024973,Ailurus_018582,
GO:BP	obsolete negative regulation of cofactor metabolic process	GO:0051195	0.0203148	0.204343	5	25	Ailurus_023311,Ailurus_004409,Ailurus_004408,Ailurus_000126,Ailurus_026506,
GO:BP	mucosal immune response	GO:0002385	0.0203148	0.204343	5	25	Ailurus_000643,Ailurus_026852,Ailurus_012562,Ailurus_000609,Ailurus_007443,
GO:BP	positive regulation of leukocyte degranulation	GO:0043302	0.0203148	0.204343	5	25	Ailurus_002610,Ailurus_000238,Ailurus_008650,Ailurus_024793,Ailurus_019679,
GO:BP	fatty acid derivative metabolic process	GO:1901568	0.0203794	0.203902	16	141	Ailurus_000685,Ailurus_000684,Ailurus_000461,Ailurus_006195,Ailurus_001990,Ailurus_004200,Ailurus_025133,Ailurus_008811,Ailurus_008234,Ailurus_023690,Ailurus_014730,Ailurus_021063,Ailurus_005462,Ailurus_019629,Ailurus_023964,Ailurus_006108,
GO:BP	vesicle organization	GO:0016050	0.0204669	0.204506	39	429	Ailurus_013776,Ailurus_020269,Ailurus_002698,Ailurus_005995,Ailurus_014686,Ailurus_000481,Ailurus_012493,Ailurus_000236,Ailurus_016814,Ailurus_024438,Ailurus_012223,Ailurus_027110,Ailurus_027112,Ailurus_021810,Ailurus_027572,Ailurus_008829,Ailurus_008679,Ailurus_010713,Ailurus_006011,Ailurus_018686,Ailurus_020152,Ailurus_007168,Ailurus_000512,Ailurus_009367,Ailurus_017194,Ailurus_000171,Ailurus_0…
GO:BP	negative regulation of toll-like receptor signaling pathway	GO:0034122	0.0206167	0.205729	6	34	Ailurus_006412,Ailurus_000771,Ailurus_000111,Ailurus_000147,Ailurus_025059,Ailurus_011924,
GO:BP	regulation of inflammatory response to antigenic stimulus	GO:0002861	0.0206167	0.205729	6	34	Ailurus_000685,Ailurus_000684,Ailurus_001187,Ailurus_024532,Ailurus_024793,Ailurus_012778,
GO:BP	protein kinase C signaling	GO:0070528	0.0206167	0.205729	6	34	Ailurus_012652,Ailurus_008383,Ailurus_027387,Ailurus_018698,Ailurus_016279,Ailurus_013030,
GO:BP	regulation of natural killer cell mediated cytotoxicity	GO:0042269	0.0206167	0.205729	6	34	Ailurus_014819,Ailurus_025458,Ailurus_025059,Ailurus_016544,Ailurus_027099,Ailurus_027093,
GO:BP	regulation of mast cell degranulation	GO:0043304	0.0206167	0.205729	6	34	Ailurus_000238,Ailurus_008650,Ailurus_024793,Ailurus_025458,Ailurus_026161,Ailurus_019679,
GO:BP	positive regulation of pattern recognition receptor signaling pathway	GO:0062208	0.0206167	0.205729	6	34	Ailurus_012652,Ailurus_012737,Ailurus_012736,Ailurus_000771,Ailurus_024186,Ailurus_000609,
GO:BP	regulation of cytokine production involved in inflammatory response	GO:1900015	0.0206167	0.205729	6	34	Ailurus_011152,Ailurus_014643,Ailurus_025457,Ailurus_000147,Ailurus_006550,Ailurus_016539,
GO:BP	stress-activated protein kinase signaling cascade	GO:0031098	0.0211836	0.208347	34	365	Ailurus_022249,Ailurus_020276,Ailurus_000409,Ailurus_018196,Ailurus_022076,Ailurus_002668,Ailurus_002655,Ailurus_005700,Ailurus_026283,Ailurus_017305,Ailurus_004202,Ailurus_026498,Ailurus_008811,Ailurus_010788,Ailurus_016078,Ailurus_018689,Ailurus_014732,Ailurus_022373,Ailurus_026965,Ailurus_008275,Ailurus_000771,Ailurus_006948,Ailurus_025458,Ailurus_004742,Ailurus_012102,Ailurus_006550,Ailurus_0…
GO:BP	regulation of MAP kinase activity	GO:0043405	0.0212525	0.208752	36	391	Ailurus_022249,Ailurus_020276,Ailurus_003970,Ailurus_000409,Ailurus_001516,Ailurus_000286,Ailurus_011397,Ailurus_005700,Ailurus_026283,Ailurus_017305,Ailurus_004202,Ailurus_004233,Ailurus_024942,Ailurus_019569,Ailurus_016078,Ailurus_018689,Ailurus_022373,Ailurus_000580,Ailurus_009366,Ailurus_008275,Ailurus_000771,Ailurus_024961,Ailurus_006948,Ailurus_023026,Ailurus_023027,Ailurus_024105,Ailurus_0…
GO:BP	protein catabolic process	GO:0030163	0.0213831	0.209761	76	931	Ailurus_000685,Ailurus_000684,Ailurus_022250,Ailurus_022249,Ailurus_009276,Ailurus_006185,Ailurus_018196,Ailurus_002609,Ailurus_002607,Ailurus_012497,Ailurus_000065,Ailurus_022285,Ailurus_014660,Ailurus_000028,Ailurus_016827,Ailurus_012223,Ailurus_009073,Ailurus_022265,Ailurus_000016,Ailurus_022911,Ailurus_018612,Ailurus_018622,Ailurus_026236,Ailurus_004202,Ailurus_000077,Ailurus_026457,Ailurus_0…
GO:BP	positive regulation of locomotion	GO:0040017	0.0216178	0.211787	51	590	Ailurus_003942,Ailurus_002614,Ailurus_022215,Ailurus_023314,Ailurus_006195,Ailurus_013960,Ailurus_022650,Ailurus_004409,Ailurus_004408,Ailurus_025102,Ailurus_000288,Ailurus_026694,Ailurus_017977,Ailurus_014686,Ailurus_025533,Ailurus_005700,Ailurus_018658,Ailurus_027387,Ailurus_003172,Ailurus_004202,Ailurus_014029,Ailurus_018601,Ailurus_006037,Ailurus_008685,Ailurus_005170,Ailurus_000716,Ailurus_0…
GO:BP	positive regulation of lymphocyte proliferation	GO:0050671	0.0216376	0.211705	16	142	Ailurus_012892,Ailurus_018825,Ailurus_005989,Ailurus_018658,Ailurus_006038,Ailurus_018018,Ailurus_008679,Ailurus_002754,Ailurus_000771,Ailurus_000188,Ailurus_025458,Ailurus_000147,Ailurus_008750,Ailurus_023961,Ailurus_001930,Ailurus_007224,
GO:BP	positive regulation of substrate adhesion-dependent cell spreading	GO:1900026	0.0220112	0.215081	7	44	Ailurus_018196,Ailurus_027387,Ailurus_000311,Ailurus_009153,Ailurus_000309,Ailurus_026161,Ailurus_015489,
GO:BP	regulation of phosphorus metabolic process	GO:0051174	0.0220293	0.214978	144	1896	Ailurus_026836,Ailurus_002610,Ailurus_022249,Ailurus_012652,Ailurus_012892,Ailurus_020276,Ailurus_022215,Ailurus_003970,Ailurus_023311,Ailurus_025978,Ailurus_013960,Ailurus_000409,Ailurus_000643,Ailurus_018196,Ailurus_001516,Ailurus_022650,Ailurus_019010,Ailurus_000665,Ailurus_013955,Ailurus_000652,Ailurus_023754,Ailurus_004409,Ailurus_004408,Ailurus_025102,Ailurus_000288,Ailurus_000286,Ailurus_0…
GO:BP	regulation of viral life cycle	GO:1903900	0.0220948	0.215339	18	166	Ailurus_022215,Ailurus_012630,Ailurus_012628,Ailurus_020002,Ailurus_000281,Ailurus_027575,Ailurus_004203,Ailurus_012778,Ailurus_001674,Ailurus_011211,Ailurus_023896,Ailurus_000512,Ailurus_025458,Ailurus_006550,Ailurus_027099,Ailurus_000609,Ailurus_017049,Ailurus_021996,
GO:BP	negative regulation of leukocyte differentiation	GO:1902106	0.0223634	0.217674	13	108	Ailurus_025533,Ailurus_008650,Ailurus_027148,Ailurus_025825,Ailurus_024734,Ailurus_024956,Ailurus_024955,Ailurus_006086,Ailurus_006550,Ailurus_008921,Ailurus_000609,Ailurus_001930,Ailurus_017248,
GO:BP	cellular response to monoamine stimulus	GO:0071868	0.0223634	0.217674	13	108	Ailurus_018639,Ailurus_000097,Ailurus_000096,Ailurus_016078,Ailurus_000311,Ailurus_002725,Ailurus_000309,Ailurus_018709,Ailurus_025059,Ailurus_026120,Ailurus_006391,Ailurus_023716,Ailurus_027042,
GO:BP	cellular response to catecholamine stimulus	GO:0071870	0.0223634	0.217674	13	108	Ailurus_018639,Ailurus_000097,Ailurus_000096,Ailurus_016078,Ailurus_000311,Ailurus_002725,Ailurus_000309,Ailurus_018709,Ailurus_025059,Ailurus_026120,Ailurus_006391,Ailurus_023716,Ailurus_027042,
GO:BP	regulation of peptidase activity	GO:0052547	0.0225878	0.219008	39	432	Ailurus_000685,Ailurus_000684,Ailurus_022249,Ailurus_023314,Ailurus_006185,Ailurus_022650,Ailurus_023167,Ailurus_018826,Ailurus_018658,Ailurus_008846,Ailurus_024085,Ailurus_008872,Ailurus_021890,Ailurus_006236,Ailurus_010713,Ailurus_009144,Ailurus_012737,Ailurus_012736,Ailurus_000302,Ailurus_022308,Ailurus_025002,Ailurus_015648,Ailurus_004537,Ailurus_025458,Ailurus_012359,Ailurus_015633,Ailurus_0…
GO:BP	regulation of vasculature development	GO:1901342	0.0225994	0.218839	32	341	Ailurus_003942,Ailurus_002610,Ailurus_022215,Ailurus_013960,Ailurus_025946,Ailurus_000643,Ailurus_013947,Ailurus_008395,Ailurus_001516,Ailurus_019010,Ailurus_017977,Ailurus_003172,Ailurus_004202,Ailurus_021890,Ailurus_014730,Ailurus_024532,Ailurus_026965,Ailurus_010119,Ailurus_009153,Ailurus_012763,Ailurus_000782,Ailurus_010329,Ailurus_024961,Ailurus_023026,Ailurus_023027,Ailurus_000126,Ailurus_0…
GO:BP	multicellular organismal homeostasis	GO:0048871	0.0227654	0.220163	36	393	Ailurus_020057,Ailurus_000685,Ailurus_000684,Ailurus_022215,Ailurus_023317,Ailurus_002639,Ailurus_013947,Ailurus_020480,Ailurus_002603,Ailurus_000665,Ailurus_018826,Ailurus_009069,Ailurus_004612,Ailurus_004202,Ailurus_025133,Ailurus_008822,Ailurus_024942,Ailurus_008679,Ailurus_016078,Ailurus_022373,Ailurus_016925,Ailurus_000340,Ailurus_022308,Ailurus_000771,Ailurus_026315,Ailurus_026308,Ailurus_0…
GO:BP	regulation of peptide transport	GO:0090087	0.0229956	0.222104	67	810	Ailurus_026849,Ailurus_022249,Ailurus_012892,Ailurus_000643,Ailurus_010462,Ailurus_018196,Ailurus_002607,Ailurus_002603,Ailurus_020487,Ailurus_023754,Ailurus_004401,Ailurus_000039,Ailurus_026852,Ailurus_024438,Ailurus_014643,Ailurus_022911,Ailurus_016007,Ailurus_008872,Ailurus_018639,Ailurus_016225,Ailurus_000077,Ailurus_025371,Ailurus_006038,Ailurus_008200,Ailurus_006040,Ailurus_006236,Ailurus_0…
GO:BP	positive regulation of macromolecule metabolic process	GO:0010604	0.0233006	0.211221	262	3630	Ailurus_024898,Ailurus_026836,Ailurus_010029,Ailurus_019084,Ailurus_022249,Ailurus_012652,Ailurus_010473,Ailurus_012892,Ailurus_020276,Ailurus_002648,Ailurus_022213,Ailurus_022215,Ailurus_003970,Ailurus_024891,Ailurus_009275,Ailurus_013994,Ailurus_021373,Ailurus_013960,Ailurus_013965,Ailurus_025946,Ailurus_000409,Ailurus_000643,Ailurus_006185,Ailurus_018196,Ailurus_022205,Ailurus_013947,Ailurus_0…
GO:BP	organic cyclic compound biosynthetic process	GO:1901362	0.0233866	0.211746	296	4137	Ailurus_000685,Ailurus_000684,Ailurus_024898,Ailurus_026836,Ailurus_010029,Ailurus_019084,Ailurus_002610,Ailurus_022249,Ailurus_010473,Ailurus_012892,Ailurus_002648,Ailurus_022215,Ailurus_000224,Ailurus_003970,Ailurus_024891,Ailurus_009275,Ailurus_013994,Ailurus_023318,Ailurus_021373,Ailurus_022220,Ailurus_023311,Ailurus_025973,Ailurus_025978,Ailurus_022227,Ailurus_008378,Ailurus_013965,Ailurus_0…
GO:BP	regulation of mast cell activation involved in immune response	GO:0033006	0.0235596	0.213056	6	35	Ailurus_000238,Ailurus_008650,Ailurus_024793,Ailurus_025458,Ailurus_026161,Ailurus_019679,
GO:BP	regulation of natural killer cell mediated immunity	GO:0002715	0.0235596	0.213056	6	35	Ailurus_014819,Ailurus_025458,Ailurus_025059,Ailurus_016544,Ailurus_027099,Ailurus_027093,
GO:BP	protein homotrimerization	GO:0070207	0.0235596	0.213056	6	35	Ailurus_022249,Ailurus_022091,Ailurus_006074,Ailurus_015855,Ailurus_005462,Ailurus_016187,
GO:BP	ectoderm development	GO:0007398	0.0235596	0.213056	6	35	Ailurus_024956,Ailurus_024955,Ailurus_002538,Ailurus_004742,Ailurus_006334,Ailurus_027041,
GO:BP	auditory receptor cell development	GO:0060117	0.0235596	0.213056	6	35	Ailurus_023317,Ailurus_008210,Ailurus_015489,Ailurus_026120,Ailurus_021966,Ailurus_021965,
GO:BP	protein transport	GO:0015031	0.0236759	0.212829	135	1771	Ailurus_013776,Ailurus_023339,Ailurus_026849,Ailurus_022249,Ailurus_012892,Ailurus_021365,Ailurus_022215,Ailurus_000643,Ailurus_010462,Ailurus_022682,Ailurus_018196,Ailurus_002609,Ailurus_002607,Ailurus_000660,Ailurus_002603,Ailurus_020487,Ailurus_023754,Ailurus_018810,Ailurus_018811,Ailurus_004401,Ailurus_000039,Ailurus_002698,Ailurus_004420,Ailurus_014686,Ailurus_018802,Ailurus_005989,Ailurus_0…
GO:BP	T cell apoptotic process	GO:0070231	0.0236833	0.212641	9	65	Ailurus_010462,Ailurus_018658,Ailurus_006038,Ailurus_010329,Ailurus_008908,Ailurus_025458,Ailurus_024105,Ailurus_004373,Ailurus_023961,
GO:BP	positive regulation of sodium ion transmembrane transporter activity	GO:2000651	0.0238467	0.213853	5	26	Ailurus_021268,Ailurus_021267,Ailurus_000311,Ailurus_000309,Ailurus_006391,
GO:BP	positive regulation of lipid storage	GO:0010884	0.0238467	0.213853	5	26	Ailurus_018810,Ailurus_018811,Ailurus_010058,Ailurus_000140,Ailurus_006550,
GO:BP	negative regulation of gene silencing	GO:0060969	0.0238467	0.213853	5	26	Ailurus_023191,Ailurus_023192,Ailurus_014966,Ailurus_006550,Ailurus_011918,
GO:BP	regulation of leukocyte mediated immunity	GO:0002703	0.0240851	0.215221	21	204	Ailurus_002610,Ailurus_022249,Ailurus_023318,Ailurus_014819,Ailurus_000238,Ailurus_018658,Ailurus_008650,Ailurus_016016,Ailurus_024532,Ailurus_024793,Ailurus_024520,Ailurus_024522,Ailurus_000771,Ailurus_025458,Ailurus_026161,Ailurus_025059,Ailurus_016544,Ailurus_027099,Ailurus_027093,Ailurus_001930,Ailurus_019679,
GO:BP	protein modification process	GO:0036211	0.0241809	0.215821	295	4125	Ailurus_000685,Ailurus_000684,Ailurus_022250,Ailurus_019084,Ailurus_002610,Ailurus_022249,Ailurus_012652,Ailurus_012892,Ailurus_020276,Ailurus_002648,Ailurus_022215,Ailurus_003970,Ailurus_009276,Ailurus_002639,Ailurus_023311,Ailurus_023314,Ailurus_025978,Ailurus_022227,Ailurus_020261,Ailurus_013960,Ailurus_013965,Ailurus_025946,Ailurus_000409,Ailurus_000643,Ailurus_008364,Ailurus_018196,Ailurus_0…
GO:BP	cellular protein modification process	GO:0006464	0.0241809	0.215821	295	4125	Ailurus_000685,Ailurus_000684,Ailurus_022250,Ailurus_019084,Ailurus_002610,Ailurus_022249,Ailurus_012652,Ailurus_012892,Ailurus_020276,Ailurus_002648,Ailurus_022215,Ailurus_003970,Ailurus_009276,Ailurus_002639,Ailurus_023311,Ailurus_023314,Ailurus_025978,Ailurus_022227,Ailurus_020261,Ailurus_013960,Ailurus_013965,Ailurus_025946,Ailurus_000409,Ailurus_000643,Ailurus_008364,Ailurus_018196,Ailurus_0…
GO:BP	vascular endothelial growth factor receptor signaling pathway	GO:0048010	0.0244125	0.217372	12	98	Ailurus_024896,Ailurus_013960,Ailurus_018196,Ailurus_026243,Ailurus_004202,Ailurus_008811,Ailurus_010119,Ailurus_023026,Ailurus_023027,Ailurus_015855,Ailurus_013030,Ailurus_025257,
GO:BP	macrophage activation	GO:0042116	0.0244225	0.217205	10	76	Ailurus_000035,Ailurus_026883,Ailurus_002668,Ailurus_004612,Ailurus_008650,Ailurus_024532,Ailurus_000771,Ailurus_025458,Ailurus_000147,Ailurus_006550,
GO:BP	membrane invagination	GO:0010324	0.0244225	0.217205	10	76	Ailurus_016805,Ailurus_002610,Ailurus_018196,Ailurus_000031,Ailurus_000030,Ailurus_008861,Ailurus_027328,Ailurus_024793,Ailurus_009367,Ailurus_021996,
GO:BP	negative regulation of NF-kappaB transcription factor activity	GO:0032088	0.0244225	0.217205	10	76	Ailurus_016827,Ailurus_017305,Ailurus_021890,Ailurus_026959,Ailurus_024532,Ailurus_000771,Ailurus_000111,Ailurus_006550,Ailurus_008750,Ailurus_025059,
GO:BP	mitochondrial outer membrane permeabilization	GO:0097345	0.024519	0.217292	8	55	Ailurus_023167,Ailurus_025102,Ailurus_008402,Ailurus_008290,Ailurus_012737,Ailurus_012736,Ailurus_015848,Ailurus_027042,
GO:BP	regulation of mitochondrial outer membrane permeabilization involved in apoptotic signaling pathway	GO:1901028	0.0246563	0.218252	7	45	Ailurus_023167,Ailurus_025102,Ailurus_008402,Ailurus_012737,Ailurus_012736,Ailurus_015848,Ailurus_027042,
GO:BP	negative regulation of lymphocyte mediated immunity	GO:0002707	0.0246563	0.218252	7	45	Ailurus_023318,Ailurus_014819,Ailurus_024520,Ailurus_024522,Ailurus_025458,Ailurus_025059,Ailurus_001930,
GO:BP	neutral lipid biosynthetic process	GO:0046460	0.0246563	0.218252	7	45	Ailurus_008234,Ailurus_004547,Ailurus_000140,Ailurus_019629,Ailurus_025277,Ailurus_023961,Ailurus_023964,
GO:BP	acylglycerol biosynthetic process	GO:0046463	0.0246563	0.218252	7	45	Ailurus_008234,Ailurus_004547,Ailurus_000140,Ailurus_019629,Ailurus_025277,Ailurus_023961,Ailurus_023964,
GO:BP	neuron death	GO:0070997	0.0247312	0.217889	40	448	Ailurus_000685,Ailurus_000684,Ailurus_023323,Ailurus_022249,Ailurus_023311,Ailurus_018196,Ailurus_002603,Ailurus_004409,Ailurus_004408,Ailurus_002655,Ailurus_021165,Ailurus_000028,Ailurus_018658,Ailurus_008872,Ailurus_026244,Ailurus_004202,Ailurus_008212,Ailurus_024942,Ailurus_008679,Ailurus_019104,Ailurus_006236,Ailurus_015173,Ailurus_014730,Ailurus_024532,Ailurus_014740,Ailurus_017194,Ailurus_0…
GO:BP	regulation of protein serine/threonine kinase activity	GO:0071900	0.0250637	0.22056	48	555	Ailurus_022249,Ailurus_012892,Ailurus_020276,Ailurus_003970,Ailurus_025978,Ailurus_000409,Ailurus_001516,Ailurus_000665,Ailurus_000286,Ailurus_011397,Ailurus_005700,Ailurus_026283,Ailurus_017305,Ailurus_017324,Ailurus_004202,Ailurus_004233,Ailurus_024942,Ailurus_019569,Ailurus_016078,Ailurus_018689,Ailurus_022373,Ailurus_000580,Ailurus_009153,Ailurus_009366,Ailurus_008275,Ailurus_012976,Ailurus_0…
GO:BP	mitochondrion organization	GO:0007005	0.0251435	0.221004	52	609	Ailurus_000685,Ailurus_000684,Ailurus_023340,Ailurus_018162,Ailurus_023167,Ailurus_025102,Ailurus_004401,Ailurus_018828,Ailurus_022088,Ailurus_018809,Ailurus_000240,Ailurus_009082,Ailurus_012223,Ailurus_000014,Ailurus_008872,Ailurus_000083,Ailurus_015578,Ailurus_024942,Ailurus_008224,Ailurus_019104,Ailurus_006236,Ailurus_008402,Ailurus_006250,Ailurus_008290,Ailurus_023218,Ailurus_000311,Ailurus_0…
GO:BP	positive regulation of GTPase activity	GO:0043547	0.0252453	0.221641	35	383	Ailurus_009049,Ailurus_020281,Ailurus_000288,Ailurus_002698,Ailurus_011155,Ailurus_011397,Ailurus_000032,Ailurus_025772,Ailurus_015970,Ailurus_002677,Ailurus_025533,Ailurus_017310,Ailurus_021810,Ailurus_004202,Ailurus_008210,Ailurus_006011,Ailurus_000581,Ailurus_008275,Ailurus_011897,Ailurus_018701,Ailurus_000194,Ailurus_026306,Ailurus_015622,Ailurus_021287,Ailurus_018783,Ailurus_025080,Ailurus_0…
GO:BP	protein phosphorylation	GO:0006468	0.0252886	0.221762	155	2064	Ailurus_002610,Ailurus_022249,Ailurus_012652,Ailurus_012892,Ailurus_020276,Ailurus_002648,Ailurus_022215,Ailurus_003970,Ailurus_002639,Ailurus_023311,Ailurus_025978,Ailurus_013960,Ailurus_000409,Ailurus_000643,Ailurus_018196,Ailurus_001516,Ailurus_022650,Ailurus_019010,Ailurus_000665,Ailurus_013955,Ailurus_023754,Ailurus_025102,Ailurus_000288,Ailurus_000286,Ailurus_010085,Ailurus_022076,Ailurus_0…
GO:BP	regulation of G protein-coupled receptor signaling pathway	GO:0008277	0.0259302	0.22451	18	169	Ailurus_022222,Ailurus_019010,Ailurus_011397,Ailurus_002677,Ailurus_025371,Ailurus_000716,Ailurus_016279,Ailurus_000311,Ailurus_013878,Ailurus_000309,Ailurus_018709,Ailurus_022134,Ailurus_025059,Ailurus_014375,Ailurus_023977,Ailurus_017255,Ailurus_018566,Ailurus_027042,
GO:BP	negative regulation of phosphate metabolic process	GO:0045936	0.0260427	0.225224	55	651	Ailurus_026836,Ailurus_012892,Ailurus_023311,Ailurus_025978,Ailurus_000409,Ailurus_022650,Ailurus_000665,Ailurus_013955,Ailurus_004409,Ailurus_004408,Ailurus_000039,Ailurus_014686,Ailurus_012483,Ailurus_011397,Ailurus_026283,Ailurus_027387,Ailurus_026498,Ailurus_004233,Ailurus_026214,Ailurus_019116,Ailurus_000716,Ailurus_024942,Ailurus_019569,Ailurus_000735,Ailurus_021890,Ailurus_006250,Ailurus_0…
GO:BP	autophagosome assembly	GO:0000045	0.0262042	0.226361	12	99	Ailurus_002698,Ailurus_018809,Ailurus_018622,Ailurus_014026,Ailurus_019104,Ailurus_016925,Ailurus_023218,Ailurus_000300,Ailurus_010823,Ailurus_002163,Ailurus_004583,Ailurus_018108,
GO:BP	regulation of cysteine-type endopeptidase activity	GO:2000116	0.0262794	0.22675	27	281	Ailurus_000685,Ailurus_000684,Ailurus_022249,Ailurus_006185,Ailurus_022650,Ailurus_023167,Ailurus_018826,Ailurus_018658,Ailurus_008846,Ailurus_024085,Ailurus_008872,Ailurus_021890,Ailurus_012737,Ailurus_012736,Ailurus_000302,Ailurus_025002,Ailurus_015648,Ailurus_025458,Ailurus_008750,Ailurus_025059,Ailurus_026599,Ailurus_013030,Ailurus_025004,Ailurus_000609,Ailurus_016187,Ailurus_022623,Ailurus_0…
GO:BP	vesicle-mediated transport to the plasma membrane	GO:0098876	0.0264318	0.227804	14	122	Ailurus_018810,Ailurus_018811,Ailurus_014686,Ailurus_012493,Ailurus_016007,Ailurus_014280,Ailurus_027572,Ailurus_008210,Ailurus_000311,Ailurus_000309,Ailurus_018795,Ailurus_018794,Ailurus_015495,Ailurus_008358,
GO:BP	obsolete positive regulation of blood vessel diameter	GO:0097755	0.0264985	0.228117	10	77	Ailurus_000685,Ailurus_000684,Ailurus_026694,Ailurus_004200,Ailurus_025457,Ailurus_015868,Ailurus_005830,Ailurus_023977,Ailurus_017288,Ailurus_022623,
GO:BP	energy reserve metabolic process	GO:0006112	0.0265428	0.228238	11	88	Ailurus_012497,Ailurus_010284,Ailurus_001586,Ailurus_003153,Ailurus_018099,Ailurus_018702,Ailurus_012391,Ailurus_006542,Ailurus_027240,Ailurus_023977,Ailurus_027042,
GO:BP	extrinsic apoptotic signaling pathway via death domain receptors	GO:0008625	0.0265428	0.228238	11	88	Ailurus_000685,Ailurus_000684,Ailurus_022249,Ailurus_000288,Ailurus_026205,Ailurus_018658,Ailurus_014730,Ailurus_010329,Ailurus_004120,Ailurus_026599,Ailurus_027044,
GO:BP	positive regulation of protein phosphorylation	GO:0001934	0.026706	0.229117	86	1081	Ailurus_022249,Ailurus_012652,Ailurus_012892,Ailurus_020276,Ailurus_022215,Ailurus_003970,Ailurus_013960,Ailurus_000409,Ailurus_000643,Ailurus_018196,Ailurus_001516,Ailurus_019010,Ailurus_000665,Ailurus_023754,Ailurus_000288,Ailurus_000286,Ailurus_002655,Ailurus_000031,Ailurus_000030,Ailurus_012223,Ailurus_025533,Ailurus_004612,Ailurus_005700,Ailurus_017305,Ailurus_017324,Ailurus_018615,Ailurus_0…
GO:BP	cytokine production involved in inflammatory response	GO:0002534	0.0267712	0.229416	6	36	Ailurus_011152,Ailurus_014643,Ailurus_025457,Ailurus_000147,Ailurus_006550,Ailurus_016539,
GO:BP	positive regulation of CD4-positive, alpha-beta T cell differentiation	GO:0043372	0.0267712	0.229416	6	36	Ailurus_008650,Ailurus_025825,Ailurus_024734,Ailurus_024956,Ailurus_024955,Ailurus_025458,
GO:BP	viral transcription	GO:0019083	0.0270387	0.231181	8	56	Ailurus_026836,Ailurus_022215,Ailurus_022299,Ailurus_025533,Ailurus_027575,Ailurus_023896,Ailurus_025043,Ailurus_024805,
GO:BP	T cell migration	GO:0072678	0.0270387	0.231181	8	56	Ailurus_025102,Ailurus_000288,Ailurus_017977,Ailurus_025533,Ailurus_018658,Ailurus_025458,Ailurus_024105,Ailurus_008750,
GO:BP	positive regulation of nitrogen compound metabolic process	GO:0051173	0.0270392	0.230661	240	3316	Ailurus_024898,Ailurus_026836,Ailurus_010029,Ailurus_019084,Ailurus_002610,Ailurus_022249,Ailurus_012652,Ailurus_010473,Ailurus_012892,Ailurus_020276,Ailurus_002648,Ailurus_022215,Ailurus_003970,Ailurus_024891,Ailurus_009275,Ailurus_013994,Ailurus_021373,Ailurus_013960,Ailurus_013965,Ailurus_025946,Ailurus_000409,Ailurus_000643,Ailurus_006185,Ailurus_018196,Ailurus_022205,Ailurus_013947,Ailurus_0…
GO:BP	regulation of phosphate metabolic process	GO:0019220	0.0271285	0.231161	143	1895	Ailurus_026836,Ailurus_002610,Ailurus_022249,Ailurus_012652,Ailurus_012892,Ailurus_020276,Ailurus_022215,Ailurus_003970,Ailurus_023311,Ailurus_025978,Ailurus_013960,Ailurus_000409,Ailurus_000643,Ailurus_018196,Ailurus_001516,Ailurus_022650,Ailurus_019010,Ailurus_000665,Ailurus_013955,Ailurus_000652,Ailurus_023754,Ailurus_004409,Ailurus_004408,Ailurus_025102,Ailurus_000288,Ailurus_000286,Ailurus_0…
GO:BP	response to vitamin	GO:0033273	0.0272656	0.232066	16	146	Ailurus_000685,Ailurus_000684,Ailurus_010462,Ailurus_022205,Ailurus_024085,Ailurus_019568,Ailurus_018689,Ailurus_000340,Ailurus_009584,Ailurus_000302,Ailurus_025457,Ailurus_026506,Ailurus_025280,Ailurus_013030,Ailurus_014126,Ailurus_021996,
GO:BP	sensory perception of pain	GO:0019233	0.0273687	0.232681	17	158	Ailurus_001516,Ailurus_025533,Ailurus_004200,Ailurus_025133,Ailurus_016078,Ailurus_023690,Ailurus_024532,Ailurus_008270,Ailurus_018709,Ailurus_005830,Ailurus_027000,Ailurus_025059,Ailurus_006391,Ailurus_023977,Ailurus_023716,Ailurus_019446,Ailurus_017235,
GO:BP	phosphorylation	GO:0016310	0.0275092	0.233611	188	2551	Ailurus_024411,Ailurus_002610,Ailurus_022249,Ailurus_012652,Ailurus_012892,Ailurus_020276,Ailurus_002648,Ailurus_022215,Ailurus_003970,Ailurus_002639,Ailurus_023311,Ailurus_025973,Ailurus_025978,Ailurus_013960,Ailurus_000409,Ailurus_000643,Ailurus_018196,Ailurus_001516,Ailurus_022650,Ailurus_019010,Ailurus_000665,Ailurus_013955,Ailurus_000652,Ailurus_000656,Ailurus_023754,Ailurus_004409,Ailurus_0…
GO:BP	intracellular pH reduction	GO:0051452	0.0275112	0.233365	7	46	Ailurus_008377,Ailurus_005995,Ailurus_004612,Ailurus_018679,Ailurus_018681,Ailurus_018680,Ailurus_020152,
GO:BP	negative regulation of lymphocyte apoptotic process	GO:0070229	0.0275112	0.233365	7	46	Ailurus_010462,Ailurus_009082,Ailurus_018658,Ailurus_006038,Ailurus_008908,Ailurus_023961,Ailurus_001930,
GO:BP	regulation of peptide secretion	GO:0002791	0.0275916	0.23352	47	545	Ailurus_026849,Ailurus_022249,Ailurus_000643,Ailurus_010462,Ailurus_002603,Ailurus_020487,Ailurus_023754,Ailurus_004401,Ailurus_000039,Ailurus_026852,Ailurus_014643,Ailurus_022911,Ailurus_018639,Ailurus_016225,Ailurus_025371,Ailurus_006038,Ailurus_006040,Ailurus_006236,Ailurus_027177,Ailurus_008650,Ailurus_006250,Ailurus_016016,Ailurus_024532,Ailurus_012778,Ailurus_008266,Ailurus_008267,Ailurus_0…
GO:BP	viral process	GO:0016032	0.0276865	0.23406	37	412	Ailurus_026836,Ailurus_002648,Ailurus_022215,Ailurus_022226,Ailurus_012630,Ailurus_018196,Ailurus_022205,Ailurus_012628,Ailurus_020002,Ailurus_000288,Ailurus_000281,Ailurus_022299,Ailurus_016870,Ailurus_000481,Ailurus_025533,Ailurus_027575,Ailurus_004203,Ailurus_008829,Ailurus_009144,Ailurus_012778,Ailurus_001674,Ailurus_011211,Ailurus_013878,Ailurus_023896,Ailurus_000512,Ailurus_018709,Ailurus_0…
GO:BP	cytoplasmic sequestering of protein	GO:0051220	0.027751	0.234342	5	27	Ailurus_020487,Ailurus_026959,Ailurus_024532,Ailurus_023947,Ailurus_023948,
GO:BP	intrinsic apoptotic signaling pathway	GO:0097193	0.0280043	0.236216	31	334	Ailurus_000685,Ailurus_000684,Ailurus_022249,Ailurus_012892,Ailurus_023311,Ailurus_022227,Ailurus_006185,Ailurus_002609,Ailurus_022650,Ailurus_025344,Ailurus_009082,Ailurus_008872,Ailurus_009528,Ailurus_008218,Ailurus_023809,Ailurus_014730,Ailurus_012737,Ailurus_012736,Ailurus_000302,Ailurus_025002,Ailurus_026778,Ailurus_024575,Ailurus_009179,Ailurus_008750,Ailurus_004383,Ailurus_026120,Ailurus_0…
GO:BP	leukocyte apoptotic process	GO:0071887	0.0281182	0.236911	14	123	Ailurus_000409,Ailurus_010462,Ailurus_009082,Ailurus_018658,Ailurus_006038,Ailurus_024532,Ailurus_024793,Ailurus_010329,Ailurus_008908,Ailurus_025458,Ailurus_024105,Ailurus_004373,Ailurus_023961,Ailurus_001930,
GO:BP	response to fungus	GO:0009620	0.0282663	0.237892	9	67	Ailurus_000643,Ailurus_010085,Ailurus_014643,Ailurus_008811,Ailurus_001674,Ailurus_025002,Ailurus_025004,Ailurus_025003,Ailurus_000609,
GO:BP	negative regulation of peptide secretion	GO:0002792	0.028829	0.242357	16	147	Ailurus_010462,Ailurus_023754,Ailurus_000039,Ailurus_018639,Ailurus_016225,Ailurus_006038,Ailurus_027177,Ailurus_024532,Ailurus_008266,Ailurus_008267,Ailurus_025458,Ailurus_015633,Ailurus_006550,Ailurus_025277,Ailurus_016539,Ailurus_026188,
GO:BP	positive regulation of leukocyte cell-cell adhesion	GO:1903039	0.0291402	0.2447	23	233	Ailurus_016805,Ailurus_018196,Ailurus_000288,Ailurus_018825,Ailurus_005989,Ailurus_018658,Ailurus_018018,Ailurus_008679,Ailurus_008650,Ailurus_025825,Ailurus_024734,Ailurus_024956,Ailurus_024955,Ailurus_006081,Ailurus_000188,Ailurus_025458,Ailurus_025422,Ailurus_024105,Ailurus_004373,Ailurus_008750,Ailurus_023961,Ailurus_001930,Ailurus_019657,
GO:BP	response to catecholamine	GO:0071869	0.0291731	0.244702	13	112	Ailurus_018639,Ailurus_000097,Ailurus_000096,Ailurus_016078,Ailurus_000311,Ailurus_002725,Ailurus_000309,Ailurus_018709,Ailurus_025059,Ailurus_026120,Ailurus_006391,Ailurus_023716,Ailurus_027042,
GO:BP	regulation of transferase activity	GO:0051338	0.0295062	0.247221	85	1072	Ailurus_022249,Ailurus_012892,Ailurus_020276,Ailurus_003970,Ailurus_025978,Ailurus_000409,Ailurus_018196,Ailurus_001516,Ailurus_022650,Ailurus_000665,Ailurus_013955,Ailurus_000286,Ailurus_000039,Ailurus_014686,Ailurus_011397,Ailurus_002655,Ailurus_004612,Ailurus_005700,Ailurus_026283,Ailurus_017305,Ailurus_017324,Ailurus_004202,Ailurus_004233,Ailurus_026214,Ailurus_008811,Ailurus_006038,Ailurus_0…
GO:BP	positive regulation of mitochondrial membrane permeability involved in apoptotic process	GO:1902110	0.0297325	0.24884	8	57	Ailurus_023167,Ailurus_025102,Ailurus_008402,Ailurus_008290,Ailurus_012737,Ailurus_012736,Ailurus_015848,Ailurus_027042,
GO:BP	regulation of gene silencing by miRNA	GO:0060964	0.0297325	0.24884	8	57	Ailurus_005700,Ailurus_023191,Ailurus_023192,Ailurus_014966,Ailurus_002359,Ailurus_006550,Ailurus_011918,Ailurus_015497,
GO:BP	negative regulation of endocytosis	GO:0045806	0.0297325	0.24884	8	57	Ailurus_016814,Ailurus_000029,Ailurus_002681,Ailurus_027328,Ailurus_010119,Ailurus_009367,Ailurus_010329,Ailurus_002163,
GO:BP	zymogen activation	GO:0031638	0.0297325	0.24884	8	57	Ailurus_026836,Ailurus_018658,Ailurus_000082,Ailurus_009144,Ailurus_011400,Ailurus_017194,Ailurus_004537,Ailurus_008750,
GO:BP	cellular transition metal ion homeostasis	GO:0046916	0.0298824	0.248987	14	124	Ailurus_019082,Ailurus_020487,Ailurus_022091,Ailurus_001590,Ailurus_004612,Ailurus_006236,Ailurus_000707,Ailurus_018209,Ailurus_002753,Ailurus_016753,Ailurus_025002,Ailurus_026583,Ailurus_025004,Ailurus_017297,
GO:BP	muscle contraction	GO:0006936	0.0299429	0.249215	34	375	Ailurus_020053,Ailurus_026834,Ailurus_019085,Ailurus_024891,Ailurus_010462,Ailurus_001516,Ailurus_020487,Ailurus_004409,Ailurus_004408,Ailurus_000043,Ailurus_010076,Ailurus_018666,Ailurus_018639,Ailurus_018624,Ailurus_023809,Ailurus_017110,Ailurus_022948,Ailurus_008074,Ailurus_014969,Ailurus_024961,Ailurus_018709,Ailurus_023026,Ailurus_023027,Ailurus_024123,Ailurus_015868,Ailurus_000120,Ailurus_0…
GO:BP	regulation of cytoskeleton organization	GO:0051493	0.0299682	0.24915	49	575	Ailurus_022250,Ailurus_018196,Ailurus_022650,Ailurus_002603,Ailurus_023167,Ailurus_000288,Ailurus_014686,Ailurus_016870,Ailurus_011399,Ailurus_015970,Ailurus_027126,Ailurus_027387,Ailurus_026243,Ailurus_004202,Ailurus_018269,Ailurus_008685,Ailurus_008679,Ailurus_018698,Ailurus_016279,Ailurus_009153,Ailurus_021261,Ailurus_002754,Ailurus_024973,Ailurus_000763,Ailurus_012737,Ailurus_012736,Ailurus_0…
GO:BP	transferrin transport	GO:0033572	0.03026	0.251298	6	37	Ailurus_018679,Ailurus_018681,Ailurus_018680,Ailurus_000311,Ailurus_000309,Ailurus_017297,
GO:BP	regulation of autophagy of mitochondrion	GO:1903146	0.03026	0.251298	6	37	Ailurus_024942,Ailurus_006236,Ailurus_024973,Ailurus_025277,Ailurus_016187,Ailurus_027042,
GO:BP	regulation of endothelial cell differentiation	GO:0045601	0.03026	0.251298	6	37	Ailurus_022215,Ailurus_000286,Ailurus_022703,Ailurus_014730,Ailurus_012763,Ailurus_013030,
GO:BP	glycogen biosynthetic process	GO:0005978	0.0305824	0.251478	7	47	Ailurus_012497,Ailurus_001586,Ailurus_018099,Ailurus_018702,Ailurus_012391,Ailurus_027240,Ailurus_027042,
GO:BP	glucan biosynthetic process	GO:0009250	0.0305824	0.251478	7	47	Ailurus_012497,Ailurus_001586,Ailurus_018099,Ailurus_018702,Ailurus_012391,Ailurus_027240,Ailurus_027042,
GO:BP	regulation of leukocyte degranulation	GO:0043300	0.0305824	0.251478	7	47	Ailurus_002610,Ailurus_000238,Ailurus_008650,Ailurus_024793,Ailurus_025458,Ailurus_026161,Ailurus_019679,
GO:BP	negative regulation of macromolecule biosynthetic process	GO:0010558	0.0307089	0.251692	118	1543	Ailurus_024898,Ailurus_019084,Ailurus_002648,Ailurus_022215,Ailurus_003970,Ailurus_013994,Ailurus_025978,Ailurus_022227,Ailurus_020257,Ailurus_025946,Ailurus_022205,Ailurus_003936,Ailurus_022650,Ailurus_020005,Ailurus_004409,Ailurus_004408,Ailurus_025344,Ailurus_018826,Ailurus_018828,Ailurus_000035,Ailurus_027521,Ailurus_012483,Ailurus_002663,Ailurus_012009,Ailurus_002655,Ailurus_000031,Ailurus_0…
GO:BP	muscle cell apoptotic process	GO:0010657	0.0307295	0.251587	11	90	Ailurus_003970,Ailurus_004202,Ailurus_019104,Ailurus_013885,Ailurus_018709,Ailurus_000194,Ailurus_003651,Ailurus_006550,Ailurus_025059,Ailurus_026599,Ailurus_012812,
GO:BP	columnar/cuboidal epithelial cell development	GO:0002066	0.0310231	0.253715	10	79	Ailurus_013994,Ailurus_023317,Ailurus_013947,Ailurus_008210,Ailurus_025825,Ailurus_015489,Ailurus_026120,Ailurus_021966,Ailurus_021965,Ailurus_027042,
GO:BP	iron ion transport	GO:0006826	0.0310231	0.253715	10	79	Ailurus_020002,Ailurus_022091,Ailurus_004612,Ailurus_018679,Ailurus_018681,Ailurus_018680,Ailurus_004060,Ailurus_000311,Ailurus_000309,Ailurus_017297,
GO:BP	cellular iron ion homeostasis	GO:0006879	0.0310231	0.253715	10	79	Ailurus_020487,Ailurus_022091,Ailurus_001590,Ailurus_004612,Ailurus_006236,Ailurus_000707,Ailurus_018209,Ailurus_002753,Ailurus_026583,Ailurus_017297,
GO:BP	response to monoamine	GO:0071867	0.0310887	0.253425	13	113	Ailurus_018639,Ailurus_000097,Ailurus_000096,Ailurus_016078,Ailurus_000311,Ailurus_002725,Ailurus_000309,Ailurus_018709,Ailurus_025059,Ailurus_026120,Ailurus_006391,Ailurus_023716,Ailurus_027042,
GO:BP	chemical homeostasis	GO:0048878	0.0313834	0.253085	103	1330	Ailurus_020057,Ailurus_000685,Ailurus_000684,Ailurus_026836,Ailurus_026834,Ailurus_026849,Ailurus_019082,Ailurus_023317,Ailurus_002639,Ailurus_012879,Ailurus_008377,Ailurus_001516,Ailurus_019010,Ailurus_002603,Ailurus_000665,Ailurus_020487,Ailurus_018810,Ailurus_018811,Ailurus_000288,Ailurus_022091,Ailurus_017977,Ailurus_026205,Ailurus_025564,Ailurus_005995,Ailurus_009069,Ailurus_021191,Ailurus_0…
GO:BP	catabolic process	GO:0009056	0.0315222	0.253932	183	2488	Ailurus_000685,Ailurus_000684,Ailurus_022250,Ailurus_023339,Ailurus_022249,Ailurus_009276,Ailurus_022222,Ailurus_023311,Ailurus_008378,Ailurus_008366,Ailurus_006185,Ailurus_010462,Ailurus_022682,Ailurus_018196,Ailurus_002609,Ailurus_002607,Ailurus_013956,Ailurus_001990,Ailurus_000652,Ailurus_004409,Ailurus_004408,Ailurus_004401,Ailurus_004402,Ailurus_026694,Ailurus_018826,Ailurus_002698,Ailurus_0…
GO:BP	antimicrobial humoral response	GO:0019730	0.0317262	0.255303	14	125	Ailurus_000643,Ailurus_022091,Ailurus_010085,Ailurus_004612,Ailurus_027148,Ailurus_012562,Ailurus_010329,Ailurus_025002,Ailurus_025004,Ailurus_025003,Ailurus_027096,Ailurus_000609,Ailurus_017049,Ailurus_007443,
GO:BP	hydrogen peroxide catabolic process	GO:0042744	0.0320382	0.257538	5	28	Ailurus_000685,Ailurus_000684,Ailurus_018826,Ailurus_008270,Ailurus_026506,
GO:BP	positive regulation of blood coagulation	GO:0030194	0.0320382	0.257538	5	28	Ailurus_006195,Ailurus_016279,Ailurus_011400,Ailurus_025004,Ailurus_024805,
GO:BP	plasminogen activation	GO:0031639	0.0320382	0.257538	5	28	Ailurus_026836,Ailurus_000082,Ailurus_011400,Ailurus_017194,Ailurus_004537,
GO:BP	positive regulation of hemostasis	GO:1900048	0.0320382	0.257538	5	28	Ailurus_006195,Ailurus_016279,Ailurus_011400,Ailurus_025004,Ailurus_024805,
GO:BP	regulation of neurotransmitter levels	GO:0001505	0.0322012	0.257747	32	351	Ailurus_013776,Ailurus_002610,Ailurus_010473,Ailurus_021365,Ailurus_024891,Ailurus_010462,Ailurus_013956,Ailurus_000288,Ailurus_000238,Ailurus_016814,Ailurus_008846,Ailurus_015135,Ailurus_027572,Ailurus_004202,Ailurus_008210,Ailurus_012728,Ailurus_021890,Ailurus_018686,Ailurus_024532,Ailurus_000311,Ailurus_001674,Ailurus_000340,Ailurus_000309,Ailurus_025457,Ailurus_000112,Ailurus_000147,Ailurus_0…
GO:BP	positive regulation of phosphorylation	GO:0042327	0.0322605	0.257947	89	1133	Ailurus_022249,Ailurus_012652,Ailurus_012892,Ailurus_020276,Ailurus_022215,Ailurus_003970,Ailurus_013960,Ailurus_000409,Ailurus_000643,Ailurus_018196,Ailurus_001516,Ailurus_019010,Ailurus_000665,Ailurus_000652,Ailurus_023754,Ailurus_000288,Ailurus_000286,Ailurus_002655,Ailurus_000031,Ailurus_000030,Ailurus_012223,Ailurus_025533,Ailurus_004612,Ailurus_005700,Ailurus_017305,Ailurus_017324,Ailurus_0…
GO:BP	negative regulation of cellular biosynthetic process	GO:0031327	0.0325377	0.259887	122	1604	Ailurus_024898,Ailurus_019084,Ailurus_002648,Ailurus_022215,Ailurus_003970,Ailurus_013994,Ailurus_023311,Ailurus_025978,Ailurus_022227,Ailurus_020257,Ailurus_025946,Ailurus_008364,Ailurus_022205,Ailurus_003936,Ailurus_022650,Ailurus_020005,Ailurus_004409,Ailurus_004408,Ailurus_025344,Ailurus_018826,Ailurus_018828,Ailurus_000035,Ailurus_027521,Ailurus_012483,Ailurus_002663,Ailurus_012009,Ailurus_0…
GO:BP	movement in host environment	GO:0052126	0.0330937	0.264048	13	114	Ailurus_012630,Ailurus_012628,Ailurus_020002,Ailurus_027575,Ailurus_004203,Ailurus_012778,Ailurus_001674,Ailurus_023896,Ailurus_018709,Ailurus_025458,Ailurus_009812,Ailurus_027099,Ailurus_021996,
GO:BP	regulation of type I interferon production	GO:0032479	0.0330937	0.264048	13	114	Ailurus_012652,Ailurus_020014,Ailurus_000650,Ailurus_017305,Ailurus_027105,Ailurus_024532,Ailurus_023888,Ailurus_000771,Ailurus_000111,Ailurus_000147,Ailurus_008750,Ailurus_004583,Ailurus_011924,
GO:BP	regulation of secretion	GO:0051046	0.033429	0.266158	76	952	Ailurus_026849,Ailurus_002610,Ailurus_022249,Ailurus_010473,Ailurus_022215,Ailurus_003970,Ailurus_000643,Ailurus_006185,Ailurus_010462,Ailurus_018196,Ailurus_002603,Ailurus_020487,Ailurus_023754,Ailurus_023167,Ailurus_004401,Ailurus_000039,Ailurus_000037,Ailurus_000238,Ailurus_026852,Ailurus_014643,Ailurus_022911,Ailurus_018639,Ailurus_015135,Ailurus_016225,Ailurus_025371,Ailurus_006038,Ailurus_0…
GO:BP	positive regulation of tumor necrosis factor superfamily cytokine production	GO:1903557	0.0334783	0.26627	10	80	Ailurus_018658,Ailurus_016016,Ailurus_014730,Ailurus_024793,Ailurus_000771,Ailurus_025458,Ailurus_024105,Ailurus_000147,Ailurus_008750,Ailurus_011924,
GO:BP	striated muscle tissue development	GO:0014706	0.0335214	0.26633	40	458	Ailurus_000685,Ailurus_000684,Ailurus_019085,Ailurus_012652,Ailurus_010473,Ailurus_022215,Ailurus_003970,Ailurus_025946,Ailurus_018196,Ailurus_022205,Ailurus_013947,Ailurus_024836,Ailurus_020005,Ailurus_004409,Ailurus_004408,Ailurus_025121,Ailurus_022299,Ailurus_012009,Ailurus_018658,Ailurus_007747,Ailurus_024910,Ailurus_023809,Ailurus_014969,Ailurus_009584,Ailurus_006074,Ailurus_025825,Ailurus_0…
GO:BP	negative regulation of cytoskeleton organization	GO:0051494	0.0339053	0.269096	15	138	Ailurus_023167,Ailurus_027387,Ailurus_018269,Ailurus_008685,Ailurus_008679,Ailurus_018698,Ailurus_009153,Ailurus_000772,Ailurus_000187,Ailurus_026306,Ailurus_026974,Ailurus_016132,Ailurus_015489,Ailurus_025043,Ailurus_021996,
GO:BP	regulation of macromolecule biosynthetic process	GO:0010556	0.0339222	0.268947	269	3767	Ailurus_024898,Ailurus_026836,Ailurus_010029,Ailurus_019084,Ailurus_002610,Ailurus_022249,Ailurus_010473,Ailurus_012892,Ailurus_002648,Ailurus_022215,Ailurus_000224,Ailurus_003970,Ailurus_024891,Ailurus_009275,Ailurus_013994,Ailurus_023318,Ailurus_021373,Ailurus_022220,Ailurus_025978,Ailurus_022227,Ailurus_013965,Ailurus_020257,Ailurus_025946,Ailurus_000409,Ailurus_018196,Ailurus_022205,Ailurus_0…
GO:BP	positive regulation of T cell activation	GO:0050870	0.0339371	0.268782	22	224	Ailurus_016805,Ailurus_018196,Ailurus_018825,Ailurus_005989,Ailurus_018658,Ailurus_018018,Ailurus_008679,Ailurus_008650,Ailurus_025825,Ailurus_024734,Ailurus_024956,Ailurus_024955,Ailurus_006081,Ailurus_000188,Ailurus_025458,Ailurus_025422,Ailurus_024105,Ailurus_004373,Ailurus_008750,Ailurus_023961,Ailurus_001930,Ailurus_019657,
GO:BP	cell differentiation	GO:0030154	0.0339717	0.268773	293	4126	Ailurus_000685,Ailurus_000684,Ailurus_023323,Ailurus_026836,Ailurus_026834,Ailurus_010029,Ailurus_016805,Ailurus_009010,Ailurus_003942,Ailurus_019085,Ailurus_019084,Ailurus_002614,Ailurus_012652,Ailurus_010473,Ailurus_020276,Ailurus_002648,Ailurus_022214,Ailurus_022215,Ailurus_003970,Ailurus_009275,Ailurus_013994,Ailurus_023317,Ailurus_023318,Ailurus_002639,Ailurus_022220,Ailurus_023311,Ailurus_0…
GO:BP	vesicle docking involved in exocytosis	GO:0006904	0.0340333	0.268977	6	38	Ailurus_020269,Ailurus_016814,Ailurus_027572,Ailurus_016279,Ailurus_009812,Ailurus_008358,
GO:BP	programmed necrotic cell death	GO:0097300	0.0340333	0.268977	6	38	Ailurus_022249,Ailurus_010284,Ailurus_016827,Ailurus_018658,Ailurus_000147,Ailurus_011924,
GO:BP	regulation of cell motility	GO:2000145	0.0341072	0.268996	74	925	Ailurus_003942,Ailurus_002614,Ailurus_022214,Ailurus_022215,Ailurus_003970,Ailurus_023314,Ailurus_006195,Ailurus_013960,Ailurus_025946,Ailurus_000409,Ailurus_024836,Ailurus_022650,Ailurus_004409,Ailurus_004408,Ailurus_025102,Ailurus_000288,Ailurus_026694,Ailurus_014686,Ailurus_000029,Ailurus_025533,Ailurus_005700,Ailurus_018658,Ailurus_027387,Ailurus_017310,Ailurus_003172,Ailurus_004202,Ailurus_0…
GO:BP	nitrogen compound transport	GO:0071705	0.0349771	0.275568	161	2174	Ailurus_013776,Ailurus_023339,Ailurus_026849,Ailurus_002615,Ailurus_022249,Ailurus_012652,Ailurus_012892,Ailurus_021365,Ailurus_022215,Ailurus_000643,Ailurus_010462,Ailurus_022682,Ailurus_018196,Ailurus_020480,Ailurus_002609,Ailurus_002607,Ailurus_000660,Ailurus_002603,Ailurus_020487,Ailurus_023754,Ailurus_018810,Ailurus_018811,Ailurus_004401,Ailurus_000039,Ailurus_002698,Ailurus_004420,Ailurus_0…
GO:BP	intrinsic apoptotic signaling pathway in response to DNA damage	GO:0008630	0.0351902	0.276957	13	115	Ailurus_012892,Ailurus_023311,Ailurus_022227,Ailurus_006185,Ailurus_025344,Ailurus_009082,Ailurus_014730,Ailurus_000302,Ailurus_024575,Ailurus_009179,Ailurus_008750,Ailurus_027096,Ailurus_016187,
GO:BP	regulation of protein secretion	GO:0050708	0.0352654	0.277259	43	500	Ailurus_026849,Ailurus_022249,Ailurus_000643,Ailurus_010462,Ailurus_002603,Ailurus_020487,Ailurus_023754,Ailurus_004401,Ailurus_000039,Ailurus_026852,Ailurus_014643,Ailurus_022911,Ailurus_018639,Ailurus_016225,Ailurus_025371,Ailurus_006038,Ailurus_006040,Ailurus_006236,Ailurus_027177,Ailurus_008650,Ailurus_006250,Ailurus_016016,Ailurus_024532,Ailurus_012778,Ailurus_008266,Ailurus_008267,Ailurus_0…
GO:BP	regulation of neuron apoptotic process	GO:0043523	0.0352834	0.277111	25	263	Ailurus_000685,Ailurus_000684,Ailurus_023323,Ailurus_018196,Ailurus_004409,Ailurus_004408,Ailurus_002655,Ailurus_008872,Ailurus_004202,Ailurus_008212,Ailurus_008679,Ailurus_019104,Ailurus_014730,Ailurus_017194,Ailurus_016753,Ailurus_013493,Ailurus_024105,Ailurus_018770,Ailurus_025059,Ailurus_013030,Ailurus_017288,Ailurus_022623,Ailurus_018582,Ailurus_027042,Ailurus_027047,
GO:BP	negative regulation of protein transport	GO:0051224	0.0355062	0.27857	20	200	Ailurus_010462,Ailurus_002607,Ailurus_023754,Ailurus_000039,Ailurus_016007,Ailurus_018639,Ailurus_016225,Ailurus_006038,Ailurus_027177,Ailurus_024532,Ailurus_008266,Ailurus_008267,Ailurus_025458,Ailurus_015633,Ailurus_023016,Ailurus_006550,Ailurus_025277,Ailurus_026599,Ailurus_016539,Ailurus_026188,
GO:BP	negative regulation of growth	GO:0045926	0.0355349	0.278505	26	276	Ailurus_012892,Ailurus_022215,Ailurus_000643,Ailurus_022088,Ailurus_010085,Ailurus_022299,Ailurus_002655,Ailurus_012223,Ailurus_026244,Ailurus_014029,Ailurus_024946,Ailurus_024532,Ailurus_023218,Ailurus_012737,Ailurus_012736,Ailurus_024951,Ailurus_000302,Ailurus_004537,Ailurus_026396,Ailurus_027001,Ailurus_018768,Ailurus_001930,Ailurus_023977,Ailurus_017288,Ailurus_025096,Ailurus_027042,
GO:BP	negative regulation of cysteine-type endopeptidase activity	GO:2000117	0.0356597	0.279192	14	127	Ailurus_000685,Ailurus_000684,Ailurus_006185,Ailurus_018826,Ailurus_008846,Ailurus_021890,Ailurus_012737,Ailurus_012736,Ailurus_000302,Ailurus_025059,Ailurus_026599,Ailurus_013030,Ailurus_000609,Ailurus_022623,
GO:BP	phagocytosis, engulfment	GO:0006911	0.0356613	0.278915	8	59	Ailurus_016805,Ailurus_002610,Ailurus_018196,Ailurus_000031,Ailurus_000030,Ailurus_027328,Ailurus_024793,Ailurus_021996,
GO:BP	hydrogen peroxide metabolic process	GO:0042743	0.0356613	0.278915	8	59	Ailurus_000685,Ailurus_000684,Ailurus_018826,Ailurus_009718,Ailurus_008811,Ailurus_008402,Ailurus_008270,Ailurus_026506,
GO:BP	regulation of posttranscriptional gene silencing	GO:0060147	0.0356613	0.278915	8	59	Ailurus_005700,Ailurus_023191,Ailurus_023192,Ailurus_014966,Ailurus_002359,Ailurus_006550,Ailurus_011918,Ailurus_015497,
GO:BP	endocytic recycling	GO:0032456	0.0356613	0.278915	8	59	Ailurus_018810,Ailurus_018811,Ailurus_014686,Ailurus_014280,Ailurus_008210,Ailurus_018795,Ailurus_018794,Ailurus_015495,
GO:BP	positive regulation of multicellular organismal process	GO:0051240	0.0357052	0.278102	142	1899	Ailurus_026836,Ailurus_026834,Ailurus_003942,Ailurus_002610,Ailurus_022249,Ailurus_012652,Ailurus_022213,Ailurus_022215,Ailurus_003970,Ailurus_006195,Ailurus_013960,Ailurus_000643,Ailurus_007039,Ailurus_025957,Ailurus_018196,Ailurus_013947,Ailurus_008395,Ailurus_001516,Ailurus_022650,Ailurus_019010,Ailurus_000660,Ailurus_000665,Ailurus_020005,Ailurus_018810,Ailurus_018811,Ailurus_000288,Ailurus_0…
GO:BP	transcription by RNA polymerase II	GO:0006366	0.03573	0.278007	185	2527	Ailurus_024898,Ailurus_010029,Ailurus_019084,Ailurus_012892,Ailurus_002648,Ailurus_022215,Ailurus_000224,Ailurus_009275,Ailurus_013994,Ailurus_023318,Ailurus_021373,Ailurus_022220,Ailurus_025978,Ailurus_022227,Ailurus_013965,Ailurus_020257,Ailurus_025946,Ailurus_000409,Ailurus_022205,Ailurus_013947,Ailurus_020005,Ailurus_004409,Ailurus_004408,Ailurus_025344,Ailurus_025121,Ailurus_018828,Ailurus_0…
GO:BP	regulation of locomotion	GO:0040012	0.0360963	0.280567	80	1012	Ailurus_003942,Ailurus_002614,Ailurus_022214,Ailurus_022215,Ailurus_003970,Ailurus_023314,Ailurus_006195,Ailurus_013960,Ailurus_025946,Ailurus_000409,Ailurus_024836,Ailurus_022650,Ailurus_012628,Ailurus_004409,Ailurus_004408,Ailurus_025102,Ailurus_000288,Ailurus_026694,Ailurus_017977,Ailurus_014686,Ailurus_000029,Ailurus_025533,Ailurus_005700,Ailurus_018658,Ailurus_027387,Ailurus_017310,Ailurus_0…
GO:BP	positive regulation of endocytosis	GO:0045807	0.0362009	0.281089	19	188	Ailurus_016805,Ailurus_002610,Ailurus_012652,Ailurus_020281,Ailurus_013947,Ailurus_023167,Ailurus_000031,Ailurus_000030,Ailurus_004612,Ailurus_018601,Ailurus_024793,Ailurus_000311,Ailurus_001674,Ailurus_000309,Ailurus_000135,Ailurus_008750,Ailurus_025059,Ailurus_013030,Ailurus_011924,
GO:BP	cellular response to peptide	GO:1901653	0.0363002	0.28157	38	434	Ailurus_021373,Ailurus_025946,Ailurus_022205,Ailurus_003936,Ailurus_000665,Ailurus_004401,Ailurus_018828,Ailurus_008846,Ailurus_008872,Ailurus_008865,Ailurus_026243,Ailurus_026214,Ailurus_000716,Ailurus_019569,Ailurus_006040,Ailurus_000735,Ailurus_018679,Ailurus_018681,Ailurus_018680,Ailurus_018689,Ailurus_012976,Ailurus_024956,Ailurus_024955,Ailurus_024961,Ailurus_016753,Ailurus_023026,Ailurus_0…
GO:BP	response to organonitrogen compound	GO:0010243	0.036353	0.281689	97	1253	Ailurus_000685,Ailurus_000684,Ailurus_002610,Ailurus_022215,Ailurus_021373,Ailurus_025946,Ailurus_010462,Ailurus_022205,Ailurus_003936,Ailurus_002607,Ailurus_002603,Ailurus_000665,Ailurus_013956,Ailurus_001990,Ailurus_000656,Ailurus_004401,Ailurus_026694,Ailurus_018828,Ailurus_009069,Ailurus_000028,Ailurus_000011,Ailurus_018658,Ailurus_008846,Ailurus_024085,Ailurus_008872,Ailurus_018639,Ailurus_0…
GO:BP	cellular developmental process	GO:0048869	0.0365983	0.283298	299	4223	Ailurus_000685,Ailurus_000684,Ailurus_023323,Ailurus_026836,Ailurus_026834,Ailurus_010029,Ailurus_016805,Ailurus_009010,Ailurus_003942,Ailurus_019085,Ailurus_019084,Ailurus_002614,Ailurus_012652,Ailurus_010473,Ailurus_012892,Ailurus_020276,Ailurus_002648,Ailurus_022214,Ailurus_022215,Ailurus_003970,Ailurus_009275,Ailurus_013994,Ailurus_023317,Ailurus_023318,Ailurus_002639,Ailurus_022220,Ailurus_0…
GO:BP	signal transduction involved in cellular response to ammonium ion	GO:1903831	0.0367166	0.283922	5	29	Ailurus_000097,Ailurus_000096,Ailurus_000716,Ailurus_018709,Ailurus_017235,
GO:BP	cellular response to acetylcholine	GO:1905145	0.0367166	0.283922	5	29	Ailurus_000097,Ailurus_000096,Ailurus_000716,Ailurus_018709,Ailurus_017235,
GO:BP	response to acetylcholine	GO:1905144	0.0367166	0.283922	5	29	Ailurus_000097,Ailurus_000096,Ailurus_000716,Ailurus_018709,Ailurus_017235,
GO:BP	vacuolar acidification	GO:0007035	0.0367166	0.283922	5	29	Ailurus_008377,Ailurus_004612,Ailurus_018679,Ailurus_018681,Ailurus_018680,
GO:BP	acetylcholine receptor signaling pathway	GO:0095500	0.0367166	0.283922	5	29	Ailurus_000097,Ailurus_000096,Ailurus_000716,Ailurus_018709,Ailurus_017235,
GO:BP	cellular response to drug	GO:0035690	0.0371938	0.274628	41	475	Ailurus_019084,Ailurus_022249,Ailurus_021373,Ailurus_023311,Ailurus_010462,Ailurus_022682,Ailurus_003936,Ailurus_022650,Ailurus_002603,Ailurus_022091,Ailurus_025121,Ailurus_009069,Ailurus_011381,Ailurus_022268,Ailurus_018639,Ailurus_000097,Ailurus_000096,Ailurus_026243,Ailurus_010788,Ailurus_000716,Ailurus_019568,Ailurus_024532,Ailurus_022113,Ailurus_000311,Ailurus_026932,Ailurus_011211,Ailurus_0…
GO:BP	regulation of muscle adaptation	GO:0043502	0.0373799	0.275732	13	116	Ailurus_022215,Ailurus_006185,Ailurus_004409,Ailurus_004408,Ailurus_022299,Ailurus_021890,Ailurus_014730,Ailurus_000194,Ailurus_026599,Ailurus_006391,Ailurus_023977,Ailurus_017288,Ailurus_027042,
GO:BP	regulation of vascular associated smooth muscle cell proliferation	GO:1904705	0.0373964	0.275583	7	49	Ailurus_012892,Ailurus_026694,Ailurus_000716,Ailurus_024910,Ailurus_018689,Ailurus_024532,Ailurus_018709,
GO:BP	vascular associated smooth muscle cell proliferation	GO:1990874	0.0373964	0.275583	7	49	Ailurus_012892,Ailurus_026694,Ailurus_000716,Ailurus_024910,Ailurus_018689,Ailurus_024532,Ailurus_018709,
GO:BP	negative regulation of GO:CC organization	GO:0051129	0.0374103	0.275147	64	790	Ailurus_000685,Ailurus_000684,Ailurus_019084,Ailurus_002648,Ailurus_022215,Ailurus_002639,Ailurus_013965,Ailurus_006185,Ailurus_018196,Ailurus_003936,Ailurus_023167,Ailurus_026205,Ailurus_002655,Ailurus_016814,Ailurus_000029,Ailurus_002681,Ailurus_027387,Ailurus_026244,Ailurus_027328,Ailurus_018843,Ailurus_018269,Ailurus_008685,Ailurus_024946,Ailurus_024942,Ailurus_008679,Ailurus_019569,Ailurus_0…
GO:BP	negative regulation of biosynthetic process	GO:0009890	0.0375709	0.276058	124	1642	Ailurus_024898,Ailurus_019084,Ailurus_002648,Ailurus_022215,Ailurus_003970,Ailurus_013994,Ailurus_023311,Ailurus_025978,Ailurus_022227,Ailurus_020257,Ailurus_025946,Ailurus_008364,Ailurus_022205,Ailurus_003936,Ailurus_022650,Ailurus_020005,Ailurus_004409,Ailurus_004408,Ailurus_025344,Ailurus_018826,Ailurus_018828,Ailurus_000035,Ailurus_027521,Ailurus_012483,Ailurus_002663,Ailurus_012009,Ailurus_0…
GO:BP	cytokine production involved in immune response	GO:0002367	0.0378607	0.277916	11	93	Ailurus_022249,Ailurus_023318,Ailurus_026852,Ailurus_004612,Ailurus_016016,Ailurus_024532,Ailurus_024793,Ailurus_009398,Ailurus_000771,Ailurus_016544,Ailurus_001930,
GO:BP	vasodilation	GO:0042311	0.0380976	0.279382	6	39	Ailurus_000685,Ailurus_000684,Ailurus_005830,Ailurus_023977,Ailurus_017288,Ailurus_022623,
GO:BP	response to hydrogen peroxide	GO:0042542	0.0388078	0.280221	20	202	Ailurus_000685,Ailurus_000684,Ailurus_002603,Ailurus_022091,Ailurus_025121,Ailurus_026694,Ailurus_011381,Ailurus_004202,Ailurus_005555,Ailurus_024532,Ailurus_022113,Ailurus_010576,Ailurus_008270,Ailurus_024961,Ailurus_013493,Ailurus_018709,Ailurus_026506,Ailurus_004383,Ailurus_026599,Ailurus_017029,
GO:BP	regulation of sodium ion transmembrane transporter activity	GO:2000649	0.038905	0.280653	8	60	Ailurus_020053,Ailurus_026834,Ailurus_021268,Ailurus_021267,Ailurus_000311,Ailurus_000309,Ailurus_026120,Ailurus_006391,
GO:BP	hair cell differentiation	GO:0035315	0.038905	0.280653	8	60	Ailurus_022215,Ailurus_023317,Ailurus_013947,Ailurus_008210,Ailurus_015489,Ailurus_026120,Ailurus_021966,Ailurus_021965,
GO:BP	positive regulation of mononuclear cell migration	GO:0071677	0.038905	0.280653	8	60	Ailurus_025102,Ailurus_025533,Ailurus_018658,Ailurus_004202,Ailurus_010329,Ailurus_025458,Ailurus_024105,Ailurus_008750,
GO:BP	regulation of gene silencing by RNA	GO:0060966	0.038905	0.280653	8	60	Ailurus_005700,Ailurus_023191,Ailurus_023192,Ailurus_014966,Ailurus_002359,Ailurus_006550,Ailurus_011918,Ailurus_015497,
GO:BP	aging	GO:0007568	0.0389192	0.279683	37	423	Ailurus_000685,Ailurus_000684,Ailurus_012892,Ailurus_006185,Ailurus_010462,Ailurus_022205,Ailurus_004401,Ailurus_026694,Ailurus_026214,Ailurus_008682,Ailurus_009144,Ailurus_024532,Ailurus_010576,Ailurus_000539,Ailurus_022308,Ailurus_024961,Ailurus_016753,Ailurus_013493,Ailurus_018709,Ailurus_025243,Ailurus_015895,Ailurus_025457,Ailurus_005830,Ailurus_026506,Ailurus_004359,Ailurus_025277,Ailurus_0…
GO:BP	neuroepithelial cell differentiation	GO:0060563	0.0392287	0.281638	9	71	Ailurus_022215,Ailurus_023317,Ailurus_013947,Ailurus_009057,Ailurus_008210,Ailurus_015489,Ailurus_026120,Ailurus_021966,Ailurus_021965,
GO:BP	positive regulation of actin filament bundle assembly	GO:0032233	0.0392287	0.281638	9	71	Ailurus_018196,Ailurus_022650,Ailurus_011399,Ailurus_016279,Ailurus_023026,Ailurus_023027,Ailurus_004358,Ailurus_025043,Ailurus_019657,
GO:BP	skeletal muscle organ development	GO:0060538	0.0395368	0.28331	21	215	Ailurus_000685,Ailurus_000684,Ailurus_012652,Ailurus_010473,Ailurus_022215,Ailurus_025946,Ailurus_013947,Ailurus_024836,Ailurus_020005,Ailurus_004409,Ailurus_004408,Ailurus_012009,Ailurus_007747,Ailurus_024910,Ailurus_023809,Ailurus_014969,Ailurus_006074,Ailurus_024734,Ailurus_018285,Ailurus_012833,Ailurus_017298,
GO:BP	type I interferon production	GO:0032606	0.0396649	0.283957	13	117	Ailurus_012652,Ailurus_020014,Ailurus_000650,Ailurus_017305,Ailurus_027105,Ailurus_024532,Ailurus_023888,Ailurus_000771,Ailurus_000111,Ailurus_000147,Ailurus_008750,Ailurus_004583,Ailurus_011924,
GO:BP	macromolecule modification	GO:0043412	0.0397276	0.284135	304	4306	Ailurus_000685,Ailurus_000684,Ailurus_022250,Ailurus_019084,Ailurus_002610,Ailurus_022249,Ailurus_012652,Ailurus_012892,Ailurus_020276,Ailurus_002648,Ailurus_022215,Ailurus_003970,Ailurus_009276,Ailurus_002639,Ailurus_023311,Ailurus_023314,Ailurus_025978,Ailurus_022227,Ailurus_020261,Ailurus_013960,Ailurus_013965,Ailurus_025946,Ailurus_000409,Ailurus_000643,Ailurus_008364,Ailurus_018196,Ailurus_0…
GO:BP	regulation of small GTPase mediated signal transduction	GO:0051056	0.0398295	0.284594	27	292	Ailurus_012652,Ailurus_022215,Ailurus_024891,Ailurus_018196,Ailurus_000032,Ailurus_025772,Ailurus_012223,Ailurus_005586,Ailurus_017310,Ailurus_008865,Ailurus_019107,Ailurus_008290,Ailurus_021263,Ailurus_000311,Ailurus_000581,Ailurus_000580,Ailurus_024985,Ailurus_000309,Ailurus_011897,Ailurus_000194,Ailurus_015622,Ailurus_001930,Ailurus_012812,Ailurus_007268,Ailurus_027051,Ailurus_018582,Ailurus_0…
GO:BP	negative regulation of protein phosphorylation	GO:0001933	0.0399121	0.284913	42	491	Ailurus_012892,Ailurus_023311,Ailurus_025978,Ailurus_000409,Ailurus_022650,Ailurus_000665,Ailurus_013955,Ailurus_011397,Ailurus_026283,Ailurus_027387,Ailurus_026498,Ailurus_004233,Ailurus_026214,Ailurus_024942,Ailurus_019569,Ailurus_000735,Ailurus_021890,Ailurus_006250,Ailurus_018689,Ailurus_021268,Ailurus_021267,Ailurus_009153,Ailurus_002725,Ailurus_000302,Ailurus_016753,Ailurus_006948,Ailurus_0…
GO:BP	regulation of striated muscle contraction	GO:0006942	0.040475	0.288658	11	94	Ailurus_019085,Ailurus_010462,Ailurus_020487,Ailurus_004409,Ailurus_004408,Ailurus_018639,Ailurus_018709,Ailurus_015868,Ailurus_006550,Ailurus_006391,Ailurus_023977,
GO:BP	glandular epithelial cell differentiation	GO:0002067	0.0411492	0.293188	7	50	Ailurus_022215,Ailurus_013994,Ailurus_022205,Ailurus_013947,Ailurus_012965,Ailurus_025825,Ailurus_027042,
GO:BP	negative regulation of protein kinase B signaling	GO:0051898	0.0411492	0.293188	7	50	Ailurus_021890,Ailurus_009153,Ailurus_024575,Ailurus_025059,Ailurus_026120,Ailurus_012833,Ailurus_019445,
GO:BP	regulation of interleukin-10 production	GO:0032653	0.0411492	0.293188	7	50	Ailurus_013947,Ailurus_024793,Ailurus_012778,Ailurus_000771,Ailurus_025458,Ailurus_008750,Ailurus_027096,
GO:BP	bone development	GO:0060348	0.0412368	0.29298	21	216	Ailurus_025728,Ailurus_013994,Ailurus_026883,Ailurus_009057,Ailurus_002655,Ailurus_008846,Ailurus_025374,Ailurus_019569,Ailurus_024910,Ailurus_017110,Ailurus_000340,Ailurus_006074,Ailurus_025825,Ailurus_021287,Ailurus_003651,Ailurus_023000,Ailurus_025898,Ailurus_025011,Ailurus_000609,Ailurus_017297,Ailurus_000623,
GO:BP	lymphocyte differentiation	GO:0030098	0.0412707	0.292944	34	385	Ailurus_019084,Ailurus_025946,Ailurus_013947,Ailurus_004409,Ailurus_004408,Ailurus_015792,Ailurus_018658,Ailurus_027105,Ailurus_004202,Ailurus_006037,Ailurus_008679,Ailurus_018485,Ailurus_008650,Ailurus_008672,Ailurus_027148,Ailurus_024532,Ailurus_024793,Ailurus_025825,Ailurus_024734,Ailurus_010559,Ailurus_024956,Ailurus_024955,Ailurus_000771,Ailurus_000188,Ailurus_025458,Ailurus_024105,Ailurus_0…
GO:BP	positive regulation of cytokine production	GO:0001819	0.0412884	0.292794	37	425	Ailurus_022249,Ailurus_012652,Ailurus_022213,Ailurus_000643,Ailurus_018825,Ailurus_011152,Ailurus_026852,Ailurus_014643,Ailurus_004612,Ailurus_018658,Ailurus_017305,Ailurus_008650,Ailurus_008672,Ailurus_016016,Ailurus_017110,Ailurus_014730,Ailurus_024532,Ailurus_024793,Ailurus_009398,Ailurus_025825,Ailurus_024970,Ailurus_023888,Ailurus_012737,Ailurus_012736,Ailurus_022308,Ailurus_000771,Ailurus_0…
GO:BP	regulation of cellular macromolecule biosynthetic process	GO:2000112	0.041354	0.292983	258	3621	Ailurus_024898,Ailurus_010029,Ailurus_019084,Ailurus_002610,Ailurus_022249,Ailurus_012892,Ailurus_002648,Ailurus_022215,Ailurus_000224,Ailurus_003970,Ailurus_024891,Ailurus_009275,Ailurus_013994,Ailurus_023318,Ailurus_021373,Ailurus_022220,Ailurus_025978,Ailurus_022227,Ailurus_013965,Ailurus_020257,Ailurus_025946,Ailurus_000409,Ailurus_018196,Ailurus_022205,Ailurus_013947,Ailurus_003936,Ailurus_0…
GO:BP	positive regulation of coagulation	GO:0050820	0.0417929	0.295814	5	30	Ailurus_006195,Ailurus_016279,Ailurus_011400,Ailurus_025004,Ailurus_024805,
GO:BP	positive regulation of sodium ion transmembrane transport	GO:1902307	0.0417929	0.295814	5	30	Ailurus_021268,Ailurus_021267,Ailurus_000311,Ailurus_000309,Ailurus_006391,
GO:BP	zinc ion homeostasis	GO:0055069	0.0417929	0.295814	5	30	Ailurus_019082,Ailurus_026205,Ailurus_006236,Ailurus_025002,Ailurus_025004,
GO:BP	positive regulation of inflammatory response	GO:0050729	0.0420569	0.296844	15	142	Ailurus_011152,Ailurus_026852,Ailurus_014643,Ailurus_022931,Ailurus_014730,Ailurus_024793,Ailurus_022373,Ailurus_011400,Ailurus_000771,Ailurus_025002,Ailurus_024105,Ailurus_000147,Ailurus_005462,Ailurus_025004,Ailurus_025003,
GO:BP	muscle adaptation	GO:0043500	0.0420569	0.296844	15	142	Ailurus_022215,Ailurus_006185,Ailurus_004409,Ailurus_004408,Ailurus_022299,Ailurus_021890,Ailurus_014730,Ailurus_000194,Ailurus_026599,Ailurus_025040,Ailurus_006391,Ailurus_023977,Ailurus_017288,Ailurus_021996,Ailurus_027042,
GO:BP	cellular extravasation	GO:0045123	0.0423399	0.298282	8	61	Ailurus_002610,Ailurus_020051,Ailurus_000288,Ailurus_018658,Ailurus_022999,Ailurus_002754,Ailurus_024105,Ailurus_001298,
GO:BP	viral gene expression	GO:0019080	0.0423644	0.298175	9	72	Ailurus_026836,Ailurus_022215,Ailurus_022299,Ailurus_025533,Ailurus_027575,Ailurus_009144,Ailurus_023896,Ailurus_025043,Ailurus_024805,
GO:BP	regulation of protein targeting	GO:1903533	0.0423644	0.298175	9	72	Ailurus_008872,Ailurus_009153,Ailurus_024973,Ailurus_016753,Ailurus_025277,Ailurus_026599,Ailurus_025266,Ailurus_018582,Ailurus_027042,
GO:BP	clathrin-dependent endocytosis	GO:0072583	0.0424584	0.298279	6	40	Ailurus_002639,Ailurus_013947,Ailurus_023167,Ailurus_000311,Ailurus_000309,Ailurus_000112,
GO:BP	regulation of superoxide metabolic process	GO:0090322	0.0424584	0.298279	6	40	Ailurus_002610,Ailurus_000716,Ailurus_018689,Ailurus_000340,Ailurus_002754,Ailurus_024961,
GO:BP	regulation of cell migration	GO:0030334	0.0426834	0.299301	69	866	Ailurus_003942,Ailurus_002614,Ailurus_022214,Ailurus_022215,Ailurus_006195,Ailurus_013960,Ailurus_025946,Ailurus_022650,Ailurus_004409,Ailurus_004408,Ailurus_025102,Ailurus_000288,Ailurus_026694,Ailurus_014686,Ailurus_000029,Ailurus_025533,Ailurus_018658,Ailurus_027387,Ailurus_017310,Ailurus_003172,Ailurus_004202,Ailurus_026498,Ailurus_014029,Ailurus_005792,Ailurus_018601,Ailurus_006037,Ailurus_0…
GO:BP	obsolete coenzyme metabolic process	GO:0006732	0.0429319	0.300763	33	373	Ailurus_002615,Ailurus_025973,Ailurus_020261,Ailurus_000043,Ailurus_018826,Ailurus_016600,Ailurus_009081,Ailurus_011381,Ailurus_018645,Ailurus_008811,Ailurus_022515,Ailurus_008204,Ailurus_008685,Ailurus_008234,Ailurus_012946,Ailurus_019568,Ailurus_002754,Ailurus_020372,Ailurus_024987,Ailurus_024958,Ailurus_001208,Ailurus_019629,Ailurus_026158,Ailurus_025280,Ailurus_008707,Ailurus_026349,Ailurus_0…
GO:BP	negative regulation of cell growth	GO:0030308	0.0433758	0.30359	19	192	Ailurus_012892,Ailurus_022088,Ailurus_022299,Ailurus_026244,Ailurus_014029,Ailurus_024946,Ailurus_023218,Ailurus_012737,Ailurus_012736,Ailurus_024951,Ailurus_000302,Ailurus_004537,Ailurus_026396,Ailurus_027001,Ailurus_018768,Ailurus_001930,Ailurus_017288,Ailurus_025096,Ailurus_027042,
GO:BP	cellular catabolic process	GO:0044248	0.0439625	0.305424	167	2279	Ailurus_000685,Ailurus_000684,Ailurus_022250,Ailurus_023339,Ailurus_009276,Ailurus_022222,Ailurus_023311,Ailurus_008378,Ailurus_008366,Ailurus_006185,Ailurus_010462,Ailurus_022682,Ailurus_002609,Ailurus_002607,Ailurus_013956,Ailurus_001990,Ailurus_000652,Ailurus_004409,Ailurus_004408,Ailurus_004401,Ailurus_004402,Ailurus_018826,Ailurus_002698,Ailurus_012497,Ailurus_012264,Ailurus_000065,Ailurus_0…
GO:BP	homeostatic process	GO:0042592	0.0440002	0.305403	146	1972	Ailurus_020057,Ailurus_000685,Ailurus_000684,Ailurus_026836,Ailurus_026834,Ailurus_026849,Ailurus_019084,Ailurus_019082,Ailurus_022215,Ailurus_009275,Ailurus_023317,Ailurus_002639,Ailurus_012879,Ailurus_008377,Ailurus_012630,Ailurus_000409,Ailurus_013947,Ailurus_020480,Ailurus_001516,Ailurus_019010,Ailurus_002603,Ailurus_000665,Ailurus_020487,Ailurus_018810,Ailurus_018811,Ailurus_000288,Ailurus_0…
GO:BP	obsolete cofactor metabolic process	GO:0051186	0.0440167	0.305237	46	549	Ailurus_000685,Ailurus_000684,Ailurus_002615,Ailurus_025973,Ailurus_020261,Ailurus_000043,Ailurus_018826,Ailurus_013120,Ailurus_016600,Ailurus_009081,Ailurus_011381,Ailurus_009718,Ailurus_018645,Ailurus_027565,Ailurus_008811,Ailurus_022515,Ailurus_008204,Ailurus_008685,Ailurus_008234,Ailurus_012946,Ailurus_008221,Ailurus_019568,Ailurus_018209,Ailurus_018689,Ailurus_002754,Ailurus_020372,Ailurus_0…
GO:BP	response to glucocorticoid	GO:0051384	0.0442665	0.306686	25	269	Ailurus_021373,Ailurus_023311,Ailurus_010462,Ailurus_022682,Ailurus_022205,Ailurus_003936,Ailurus_001990,Ailurus_003172,Ailurus_026214,Ailurus_024942,Ailurus_016078,Ailurus_018689,Ailurus_024532,Ailurus_012778,Ailurus_024970,Ailurus_024961,Ailurus_025243,Ailurus_025457,Ailurus_015868,Ailurus_000358,Ailurus_012102,Ailurus_026506,Ailurus_020856,Ailurus_013030,Ailurus_023716,
GO:BP	regulation of protein transport	GO:0051223	0.0443554	0.307019	63	784	Ailurus_026849,Ailurus_022249,Ailurus_012892,Ailurus_000643,Ailurus_010462,Ailurus_018196,Ailurus_002607,Ailurus_002603,Ailurus_020487,Ailurus_023754,Ailurus_004401,Ailurus_000039,Ailurus_026852,Ailurus_024438,Ailurus_014643,Ailurus_022911,Ailurus_016007,Ailurus_008872,Ailurus_018639,Ailurus_016225,Ailurus_000077,Ailurus_025371,Ailurus_006038,Ailurus_008200,Ailurus_006040,Ailurus_006236,Ailurus_0…
GO:BP	alpha-beta T cell differentiation	GO:0046632	0.0445274	0.307927	13	119	Ailurus_027105,Ailurus_018485,Ailurus_008650,Ailurus_008672,Ailurus_025825,Ailurus_024734,Ailurus_010559,Ailurus_024956,Ailurus_024955,Ailurus_025458,Ailurus_006550,Ailurus_027096,Ailurus_001930,
GO:BP	defense response to Gram-positive bacterium	GO:0050830	0.0446547	0.308523	10	84	Ailurus_000643,Ailurus_010085,Ailurus_016870,Ailurus_008811,Ailurus_027148,Ailurus_012562,Ailurus_000340,Ailurus_024970,Ailurus_004120,Ailurus_007443,
GO:BP	angiogenesis	GO:0001525	0.0451323	0.311537	41	482	Ailurus_000685,Ailurus_000684,Ailurus_003942,Ailurus_002614,Ailurus_002610,Ailurus_022215,Ailurus_013960,Ailurus_025946,Ailurus_000643,Ailurus_018196,Ailurus_022205,Ailurus_013947,Ailurus_008395,Ailurus_001516,Ailurus_019010,Ailurus_026694,Ailurus_017977,Ailurus_004420,Ailurus_000243,Ailurus_003172,Ailurus_004202,Ailurus_021890,Ailurus_014730,Ailurus_024532,Ailurus_026965,Ailurus_010119,Ailurus_0…
GO:BP	endochondral bone morphogenesis	GO:0060350	0.0451384	0.311294	7	51	Ailurus_025728,Ailurus_013994,Ailurus_002655,Ailurus_008846,Ailurus_019569,Ailurus_024910,Ailurus_025825,
GO:BP	negative regulation of osteoblast differentiation	GO:0045668	0.0451384	0.311294	7	51	Ailurus_022215,Ailurus_025946,Ailurus_004409,Ailurus_004408,Ailurus_010516,Ailurus_006074,Ailurus_021287,
GO:BP	positive regulation of protein serine/threonine kinase activity	GO:0071902	0.0452285	0.311344	34	388	Ailurus_022249,Ailurus_020276,Ailurus_003970,Ailurus_000409,Ailurus_001516,Ailurus_000286,Ailurus_005700,Ailurus_017305,Ailurus_017324,Ailurus_004202,Ailurus_016078,Ailurus_022373,Ailurus_000580,Ailurus_009153,Ailurus_009366,Ailurus_008275,Ailurus_012976,Ailurus_000771,Ailurus_024961,Ailurus_006948,Ailurus_023026,Ailurus_023027,Ailurus_025458,Ailurus_024105,Ailurus_025080,Ailurus_025049,Ailurus_0…
GO:BP	regulation of secretion by cell	GO:1903530	0.0452725	0.311362	71	897	Ailurus_026849,Ailurus_002610,Ailurus_022249,Ailurus_010473,Ailurus_022215,Ailurus_003970,Ailurus_000643,Ailurus_006185,Ailurus_010462,Ailurus_018196,Ailurus_002603,Ailurus_020487,Ailurus_023754,Ailurus_004401,Ailurus_000039,Ailurus_000037,Ailurus_000238,Ailurus_026852,Ailurus_014643,Ailurus_022911,Ailurus_018639,Ailurus_015135,Ailurus_016225,Ailurus_025371,Ailurus_006038,Ailurus_019116,Ailurus_0…
GO:BP	positive regulation of peptide secretion	GO:0002793	0.0452912	0.311206	30	335	Ailurus_026849,Ailurus_000643,Ailurus_002603,Ailurus_020487,Ailurus_004401,Ailurus_026852,Ailurus_014643,Ailurus_025371,Ailurus_006038,Ailurus_006040,Ailurus_006236,Ailurus_008650,Ailurus_006250,Ailurus_016016,Ailurus_024532,Ailurus_012778,Ailurus_022308,Ailurus_025002,Ailurus_025458,Ailurus_006952,Ailurus_006953,Ailurus_015868,Ailurus_024105,Ailurus_008750,Ailurus_025004,Ailurus_023977,Ailurus_0…
GO:BP	interleukin-12 production	GO:0032615	0.0459696	0.31558	8	62	Ailurus_024532,Ailurus_000340,Ailurus_000771,Ailurus_006728,Ailurus_000188,Ailurus_025458,Ailurus_025059,Ailurus_017288,
GO:BP	positive regulation of chemokine production	GO:0032722	0.0459696	0.31558	8	62	Ailurus_026852,Ailurus_008650,Ailurus_024970,Ailurus_022308,Ailurus_000771,Ailurus_025458,Ailurus_000147,Ailurus_008750,
GO:BP	cellular response to peptide hormone stimulus	GO:0071375	0.0466086	0.319384	34	389	Ailurus_025946,Ailurus_022205,Ailurus_003936,Ailurus_000665,Ailurus_004401,Ailurus_018828,Ailurus_008846,Ailurus_008865,Ailurus_026243,Ailurus_026214,Ailurus_000716,Ailurus_019569,Ailurus_006040,Ailurus_000735,Ailurus_018679,Ailurus_018681,Ailurus_018680,Ailurus_018689,Ailurus_012976,Ailurus_024956,Ailurus_024955,Ailurus_024961,Ailurus_023026,Ailurus_023027,Ailurus_017216,Ailurus_008752,Ailurus_0…
GO:BP	cardiac muscle contraction	GO:0060048	0.0470049	0.321806	14	132	Ailurus_020053,Ailurus_026834,Ailurus_019085,Ailurus_020487,Ailurus_004409,Ailurus_004408,Ailurus_018639,Ailurus_018624,Ailurus_018709,Ailurus_015868,Ailurus_006550,Ailurus_006391,Ailurus_017298,Ailurus_023977,
GO:BP	positive regulation of autophagy	GO:0010508	0.0471083	0.322221	13	120	Ailurus_022222,Ailurus_012967,Ailurus_024942,Ailurus_019104,Ailurus_023218,Ailurus_010119,Ailurus_011211,Ailurus_023896,Ailurus_000771,Ailurus_026778,Ailurus_026981,Ailurus_000147,Ailurus_006550,
GO:BP	regulation of JUN kinase activity	GO:0043506	0.0471083	0.322221	13	120	Ailurus_022249,Ailurus_020276,Ailurus_000409,Ailurus_017305,Ailurus_004202,Ailurus_016078,Ailurus_018689,Ailurus_022373,Ailurus_008275,Ailurus_000771,Ailurus_025080,Ailurus_018770,Ailurus_019657,
GO:BP	positive regulation of CD4-positive, alpha-beta T cell activation	GO:2000516	0.0471202	0.321717	6	41	Ailurus_008650,Ailurus_025825,Ailurus_024734,Ailurus_024956,Ailurus_024955,Ailurus_025458,
GO:BP	positive regulation of T cell migration	GO:2000406	0.0472716	0.322458	5	31	Ailurus_025102,Ailurus_018658,Ailurus_025458,Ailurus_024105,Ailurus_008750,
GO:BP	synaptic transmission, dopaminergic	GO:0001963	0.0472716	0.322458	5	31	Ailurus_012652,Ailurus_002725,Ailurus_025059,Ailurus_022623,Ailurus_010868,
GO:BP	desensitization of G protein-coupled receptor signaling pathway	GO:0002029	0.0472716	0.322458	5	31	Ailurus_019010,Ailurus_000311,Ailurus_000309,Ailurus_018709,Ailurus_025059,
GO:BP	negative regulation of oxidoreductase activity	GO:0051354	0.0472716	0.322458	5	31	Ailurus_010462,Ailurus_018826,Ailurus_018689,Ailurus_002725,Ailurus_026506,
GO:BP	regulation of T-helper 1 type immune response	GO:0002825	0.0472716	0.322458	5	31	Ailurus_004612,Ailurus_008650,Ailurus_008672,Ailurus_016016,Ailurus_024734,
GO:BP	positive regulation of myeloid leukocyte mediated immunity	GO:0002888	0.0472716	0.322458	5	31	Ailurus_002610,Ailurus_000238,Ailurus_008650,Ailurus_024793,Ailurus_019679,
GO:BP	negative adaptation of signaling pathway	GO:0022401	0.0472716	0.322458	5	31	Ailurus_019010,Ailurus_000311,Ailurus_000309,Ailurus_018709,Ailurus_025059,
GO:BP	positive regulation of erythrocyte differentiation	GO:0045648	0.0472716	0.322458	5	31	Ailurus_014029,Ailurus_012737,Ailurus_012736,Ailurus_013493,Ailurus_015493,
GO:BP	membrane fusion	GO:0061025	0.0475386	0.321945	24	258	Ailurus_013776,Ailurus_002648,Ailurus_020269,Ailurus_002698,Ailurus_005995,Ailurus_016814,Ailurus_009082,Ailurus_008872,Ailurus_021810,Ailurus_027572,Ailurus_008679,Ailurus_006011,Ailurus_018686,Ailurus_000311,Ailurus_020152,Ailurus_000309,Ailurus_018701,Ailurus_024105,Ailurus_009812,Ailurus_027099,Ailurus_022889,Ailurus_018129,Ailurus_007224,Ailurus_027047,
GO:BP	muscle organ development	GO:0007517	0.0476862	0.319209	37	430	Ailurus_000685,Ailurus_000684,Ailurus_019085,Ailurus_012652,Ailurus_010473,Ailurus_022215,Ailurus_003970,Ailurus_025946,Ailurus_022205,Ailurus_013947,Ailurus_024836,Ailurus_020005,Ailurus_020487,Ailurus_004409,Ailurus_004408,Ailurus_022299,Ailurus_012009,Ailurus_007747,Ailurus_024910,Ailurus_023809,Ailurus_000947,Ailurus_022948,Ailurus_014969,Ailurus_006074,Ailurus_024734,Ailurus_018285,Ailurus_0…
GO:BP	lymphocyte migration	GO:0072676	0.0478009	0.319692	10	85	Ailurus_025102,Ailurus_000288,Ailurus_017977,Ailurus_025533,Ailurus_018658,Ailurus_004202,Ailurus_025458,Ailurus_024105,Ailurus_008750,Ailurus_025011,
GO:BP	striated muscle cell differentiation	GO:0051146	0.0479403	0.32034	31	350	Ailurus_000685,Ailurus_000684,Ailurus_019085,Ailurus_012652,Ailurus_010473,Ailurus_022215,Ailurus_003970,Ailurus_025946,Ailurus_022205,Ailurus_013947,Ailurus_018810,Ailurus_018811,Ailurus_004409,Ailurus_004408,Ailurus_025121,Ailurus_022299,Ailurus_017176,Ailurus_008650,Ailurus_023809,Ailurus_006074,Ailurus_025825,Ailurus_018285,Ailurus_000194,Ailurus_004742,Ailurus_008752,Ailurus_025059,Ailurus_0…
GO:BP	extracellular matrix organization	GO:0030198	0.0479403	0.32034	31	350	Ailurus_026836,Ailurus_002614,Ailurus_012652,Ailurus_022215,Ailurus_023314,Ailurus_006195,Ailurus_013960,Ailurus_006185,Ailurus_000294,Ailurus_026694,Ailurus_010085,Ailurus_014686,Ailurus_000011,Ailurus_017110,Ailurus_009144,Ailurus_014730,Ailurus_023888,Ailurus_000518,Ailurus_024951,Ailurus_010329,Ailurus_026573,Ailurus_015633,Ailurus_024105,Ailurus_024795,Ailurus_015855,Ailurus_009814,Ailurus_0…
GO:BP	positive regulation of phosphorus metabolic process	GO:0010562	0.0481239	0.320997	92	1198	Ailurus_022249,Ailurus_012652,Ailurus_012892,Ailurus_020276,Ailurus_022215,Ailurus_003970,Ailurus_013960,Ailurus_000409,Ailurus_000643,Ailurus_018196,Ailurus_001516,Ailurus_019010,Ailurus_000665,Ailurus_000652,Ailurus_023754,Ailurus_000288,Ailurus_000286,Ailurus_002655,Ailurus_000031,Ailurus_000030,Ailurus_012223,Ailurus_025533,Ailurus_004612,Ailurus_005700,Ailurus_017305,Ailurus_017324,Ailurus_0…
GO:BP	positive regulation of phosphate metabolic process	GO:0045937	0.0481239	0.320997	92	1198	Ailurus_022249,Ailurus_012652,Ailurus_012892,Ailurus_020276,Ailurus_022215,Ailurus_003970,Ailurus_013960,Ailurus_000409,Ailurus_000643,Ailurus_018196,Ailurus_001516,Ailurus_019010,Ailurus_000665,Ailurus_000652,Ailurus_023754,Ailurus_000288,Ailurus_000286,Ailurus_002655,Ailurus_000031,Ailurus_000030,Ailurus_012223,Ailurus_025533,Ailurus_004612,Ailurus_005700,Ailurus_017305,Ailurus_017324,Ailurus_0…
GO:BP	establishment of protein localization	GO:0045184	0.048439	0.322527	139	1877	Ailurus_013776,Ailurus_023339,Ailurus_026849,Ailurus_022249,Ailurus_012892,Ailurus_021365,Ailurus_022215,Ailurus_000643,Ailurus_010462,Ailurus_022682,Ailurus_018196,Ailurus_002609,Ailurus_002607,Ailurus_000660,Ailurus_002603,Ailurus_020487,Ailurus_023754,Ailurus_018810,Ailurus_018811,Ailurus_004401,Ailurus_000039,Ailurus_002698,Ailurus_004420,Ailurus_014686,Ailurus_018802,Ailurus_005989,Ailurus_0…
GO:BP	iron ion homeostasis	GO:0055072	0.0490612	0.32638	11	97	Ailurus_020487,Ailurus_022091,Ailurus_001590,Ailurus_004612,Ailurus_006236,Ailurus_000707,Ailurus_018209,Ailurus_004060,Ailurus_002753,Ailurus_026583,Ailurus_017297,
GO:BP	cellular polysaccharide metabolic process	GO:0044264	0.0490612	0.32638	11	97	Ailurus_012497,Ailurus_010284,Ailurus_001586,Ailurus_003153,Ailurus_018099,Ailurus_018702,Ailurus_012391,Ailurus_006542,Ailurus_027240,Ailurus_023977,Ailurus_027042,
GO:BP	regulation of cellular response to insulin stimulus	GO:1900076	0.0490612	0.32638	11	97	Ailurus_018828,Ailurus_026214,Ailurus_000716,Ailurus_019569,Ailurus_006040,Ailurus_000735,Ailurus_012976,Ailurus_024956,Ailurus_024955,Ailurus_008752,Ailurus_027042,
GO:BP	regulation of alpha-beta T cell differentiation	GO:0046637	0.0491312	0.325981	9	74	Ailurus_008650,Ailurus_008672,Ailurus_025825,Ailurus_024734,Ailurus_024956,Ailurus_024955,Ailurus_025458,Ailurus_006550,Ailurus_001930,
GO:BP	response to corticosteroid	GO:0031960	0.0492733	0.326637	26	285	Ailurus_022215,Ailurus_021373,Ailurus_023311,Ailurus_010462,Ailurus_022682,Ailurus_022205,Ailurus_003936,Ailurus_001990,Ailurus_003172,Ailurus_026214,Ailurus_024942,Ailurus_016078,Ailurus_018689,Ailurus_024532,Ailurus_012778,Ailurus_024970,Ailurus_024961,Ailurus_025243,Ailurus_025457,Ailurus_015868,Ailurus_000358,Ailurus_012102,Ailurus_026506,Ailurus_020856,Ailurus_013030,Ailurus_023716,
GO:BP	regulation of lymphocyte migration	GO:2000401	0.0493674	0.326972	7	52	Ailurus_025102,Ailurus_025533,Ailurus_018658,Ailurus_004202,Ailurus_025458,Ailurus_024105,Ailurus_008750,
GO:BP	calcium-ion regulated exocytosis	GO:0017156	0.0495453	0.327862	14	133	Ailurus_013776,Ailurus_021365,Ailurus_022215,Ailurus_000037,Ailurus_000238,Ailurus_016814,Ailurus_027572,Ailurus_025371,Ailurus_008210,Ailurus_000716,Ailurus_018686,Ailurus_000112,Ailurus_026161,Ailurus_027047,
GO:BP	plasma membrane organization	GO:0007009	0.049791	0.329198	13	121	Ailurus_013776,Ailurus_012652,Ailurus_027572,Ailurus_000311,Ailurus_009367,Ailurus_000309,Ailurus_008752,Ailurus_015495,Ailurus_027000,Ailurus_025004,Ailurus_022889,Ailurus_021996,Ailurus_025097,
GO:BP	negative regulation of leukocyte apoptotic process	GO:2000107	0.049797	0.328949	8	63	Ailurus_010462,Ailurus_009082,Ailurus_018658,Ailurus_006038,Ailurus_024793,Ailurus_008908,Ailurus_023961,Ailurus_001930,
GO:BP	regulation of cardiocyte differentiation	GO:1905207	0.049797	0.328949	8	63	Ailurus_013947,Ailurus_022299,Ailurus_000194,Ailurus_004742,Ailurus_025059,Ailurus_023977,Ailurus_017288,Ailurus_027042,
GO:BP	negative regulation of mitochondrion organization	GO:0010823	0.049797	0.328949	8	63	Ailurus_000685,Ailurus_000684,Ailurus_012737,Ailurus_012736,Ailurus_015848,Ailurus_025059,Ailurus_026599,Ailurus_016187,
GO:CC	obsolete cytoplasmic vesicle part	GO:0044433	6.22e-10	5.43e-07	135	1243	Ailurus_023330,Ailurus_016805,Ailurus_012894,Ailurus_010473,Ailurus_020281,Ailurus_020276,Ailurus_000643,Ailurus_008369,Ailurus_006185,Ailurus_020269,Ailurus_025957,Ailurus_017073,Ailurus_002603,Ailurus_018810,Ailurus_018811,Ailurus_023167,Ailurus_022091,Ailurus_026204,Ailurus_010085,Ailurus_025564,Ailurus_002672,Ailurus_026883,Ailurus_000481,Ailurus_012493,Ailurus_000238,Ailurus_000237,Ailurus_0…
GO:CC	specific granule	GO:0042581	3.37e-09	1.47e-06	30	139	Ailurus_012894,Ailurus_000643,Ailurus_006185,Ailurus_002603,Ailurus_022091,Ailurus_026204,Ailurus_000481,Ailurus_000238,Ailurus_000237,Ailurus_015969,Ailurus_000029,Ailurus_003172,Ailurus_018612,Ailurus_018622,Ailurus_023600,Ailurus_008234,Ailurus_023203,Ailurus_001674,Ailurus_002754,Ailurus_017194,Ailurus_015442,Ailurus_024105,Ailurus_000141,Ailurus_026506,Ailurus_017299,Ailurus_018149,Ailurus_0…
GO:CC	vesicle	GO:0031982	3.76e-08	1.09e-05	211	2316	Ailurus_023330,Ailurus_016805,Ailurus_013776,Ailurus_002610,Ailurus_022249,Ailurus_012894,Ailurus_012652,Ailurus_010473,Ailurus_020281,Ailurus_021127,Ailurus_020276,Ailurus_021365,Ailurus_022215,Ailurus_002639,Ailurus_006195,Ailurus_013960,Ailurus_020497,Ailurus_000409,Ailurus_000643,Ailurus_008369,Ailurus_006185,Ailurus_020269,Ailurus_025957,Ailurus_018196,Ailurus_013947,Ailurus_017073,Ailurus_0…
GO:CC	tertiary granule	GO:0070820	9.3e-08	2.03e-05	27	134	Ailurus_016805,Ailurus_020276,Ailurus_000643,Ailurus_002603,Ailurus_026204,Ailurus_000238,Ailurus_000237,Ailurus_015969,Ailurus_000029,Ailurus_004612,Ailurus_003153,Ailurus_018622,Ailurus_005170,Ailurus_018679,Ailurus_018681,Ailurus_018680,Ailurus_024793,Ailurus_001674,Ailurus_011406,Ailurus_010329,Ailurus_018701,Ailurus_024105,Ailurus_000141,Ailurus_026506,Ailurus_018149,Ailurus_000623,Ailurus_0…
GO:CC	cytoplasmic vesicle	GO:0031410	1.26e-07	2.19e-05	199	2190	Ailurus_023330,Ailurus_016805,Ailurus_013776,Ailurus_002610,Ailurus_012894,Ailurus_012652,Ailurus_010473,Ailurus_020281,Ailurus_021127,Ailurus_020276,Ailurus_021365,Ailurus_022215,Ailurus_006195,Ailurus_013960,Ailurus_020497,Ailurus_000409,Ailurus_000643,Ailurus_008369,Ailurus_006185,Ailurus_020269,Ailurus_025957,Ailurus_018196,Ailurus_013947,Ailurus_017073,Ailurus_002603,Ailurus_010686,Ailurus_0…
GO:CC	intracellular vesicle	GO:0097708	1.54e-07	2.24e-05	199	2196	Ailurus_023330,Ailurus_016805,Ailurus_013776,Ailurus_002610,Ailurus_012894,Ailurus_012652,Ailurus_010473,Ailurus_020281,Ailurus_021127,Ailurus_020276,Ailurus_021365,Ailurus_022215,Ailurus_006195,Ailurus_013960,Ailurus_020497,Ailurus_000409,Ailurus_000643,Ailurus_008369,Ailurus_006185,Ailurus_020269,Ailurus_025957,Ailurus_018196,Ailurus_013947,Ailurus_017073,Ailurus_002603,Ailurus_010686,Ailurus_0…
GO:CC	secretory granule	GO:0030141	3.44e-07	4.29e-05	91	831	Ailurus_016805,Ailurus_002610,Ailurus_012894,Ailurus_010473,Ailurus_020276,Ailurus_022215,Ailurus_000643,Ailurus_008369,Ailurus_006185,Ailurus_025957,Ailurus_018196,Ailurus_002603,Ailurus_022091,Ailurus_026204,Ailurus_000037,Ailurus_010085,Ailurus_025564,Ailurus_026883,Ailurus_000481,Ailurus_000238,Ailurus_000237,Ailurus_015969,Ailurus_000032,Ailurus_010284,Ailurus_000029,Ailurus_004620,Ailurus_0…
GO:CC	specific granule lumen	GO:0035580	3.36e-06	0.000367	14	52	Ailurus_000643,Ailurus_022091,Ailurus_015969,Ailurus_000029,Ailurus_018612,Ailurus_018622,Ailurus_001674,Ailurus_017194,Ailurus_000141,Ailurus_026506,Ailurus_017299,Ailurus_018149,Ailurus_017049,Ailurus_007673,
GO:CC	ficolin-1-rich granule	GO:0101002	4.39e-06	0.000426	28	171	Ailurus_016805,Ailurus_020276,Ailurus_002603,Ailurus_015969,Ailurus_010284,Ailurus_011381,Ailurus_001586,Ailurus_004612,Ailurus_003153,Ailurus_018622,Ailurus_005170,Ailurus_010713,Ailurus_018679,Ailurus_018681,Ailurus_018680,Ailurus_018689,Ailurus_023690,Ailurus_024793,Ailurus_013878,Ailurus_012737,Ailurus_012736,Ailurus_011406,Ailurus_017194,Ailurus_010329,Ailurus_018701,Ailurus_024105,Ailurus_0…
GO:CC	ficolin-1-rich granule membrane	GO:0101003	5.41e-06	0.000473	13	47	Ailurus_016805,Ailurus_002603,Ailurus_004612,Ailurus_003153,Ailurus_018679,Ailurus_018681,Ailurus_018680,Ailurus_024793,Ailurus_011406,Ailurus_010329,Ailurus_018701,Ailurus_024105,Ailurus_000623,
GO:CC	secretory vesicle	GO:0099503	9.63e-06	0.000765	99	1000	Ailurus_016805,Ailurus_013776,Ailurus_002610,Ailurus_012894,Ailurus_010473,Ailurus_020281,Ailurus_020276,Ailurus_021365,Ailurus_022215,Ailurus_000643,Ailurus_008369,Ailurus_006185,Ailurus_025957,Ailurus_018196,Ailurus_002603,Ailurus_022091,Ailurus_026204,Ailurus_000037,Ailurus_010085,Ailurus_025564,Ailurus_026883,Ailurus_000481,Ailurus_000238,Ailurus_000237,Ailurus_015969,Ailurus_000032,Ailurus_0…
GO:CC	secretory granule membrane	GO:0030667	1.02e-05	0.000743	38	280	Ailurus_016805,Ailurus_012894,Ailurus_010473,Ailurus_008369,Ailurus_006185,Ailurus_002603,Ailurus_026204,Ailurus_025564,Ailurus_026883,Ailurus_000481,Ailurus_000238,Ailurus_000237,Ailurus_004620,Ailurus_000011,Ailurus_004612,Ailurus_003153,Ailurus_018639,Ailurus_027328,Ailurus_025371,Ailurus_008234,Ailurus_018679,Ailurus_018681,Ailurus_018680,Ailurus_023203,Ailurus_024793,Ailurus_008285,Ailurus_0…
GO:CC	endocytic vesicle	GO:0030139	1.06e-05	0.000709	39	291	Ailurus_013776,Ailurus_021127,Ailurus_018196,Ailurus_023754,Ailurus_018810,Ailurus_018811,Ailurus_005995,Ailurus_000238,Ailurus_004612,Ailurus_003172,Ailurus_016225,Ailurus_008811,Ailurus_023600,Ailurus_008679,Ailurus_019104,Ailurus_018679,Ailurus_018681,Ailurus_018680,Ailurus_000311,Ailurus_012778,Ailurus_020152,Ailurus_008270,Ailurus_000309,Ailurus_000782,Ailurus_000771,Ailurus_006952,Ailurus_0…
GO:CC	phagocytic vesicle	GO:0045335	1.09e-05	0.00068	22	123	Ailurus_013776,Ailurus_021127,Ailurus_018196,Ailurus_005995,Ailurus_000238,Ailurus_004612,Ailurus_003172,Ailurus_016225,Ailurus_008811,Ailurus_023600,Ailurus_008679,Ailurus_019104,Ailurus_018679,Ailurus_018681,Ailurus_018680,Ailurus_020152,Ailurus_000771,Ailurus_024105,Ailurus_018783,Ailurus_016132,Ailurus_026102,Ailurus_021996,
GO:CC	vesicle membrane	GO:0012506	2.55e-05	0.00148234	89	897	Ailurus_016805,Ailurus_022249,Ailurus_012894,Ailurus_010473,Ailurus_020281,Ailurus_008369,Ailurus_006185,Ailurus_020269,Ailurus_017073,Ailurus_002603,Ailurus_018810,Ailurus_018811,Ailurus_023167,Ailurus_026204,Ailurus_025564,Ailurus_002672,Ailurus_026883,Ailurus_000481,Ailurus_012493,Ailurus_000238,Ailurus_000237,Ailurus_004620,Ailurus_000011,Ailurus_004612,Ailurus_018666,Ailurus_003153,Ailurus_0…
GO:CC	secretory granule lumen	GO:0034774	2.93e-05	0.00159708	40	315	Ailurus_010473,Ailurus_020276,Ailurus_000643,Ailurus_025957,Ailurus_022091,Ailurus_010085,Ailurus_015969,Ailurus_000032,Ailurus_010284,Ailurus_000029,Ailurus_011381,Ailurus_001586,Ailurus_000017,Ailurus_018612,Ailurus_018622,Ailurus_008204,Ailurus_010713,Ailurus_018689,Ailurus_023690,Ailurus_001674,Ailurus_013878,Ailurus_002702,Ailurus_017194,Ailurus_025002,Ailurus_015683,Ailurus_012359,Ailurus_0…
GO:CC	cytoplasmic vesicle lumen	GO:0060205	3.38e-05	0.00173602	41	328	Ailurus_010473,Ailurus_020276,Ailurus_000643,Ailurus_025957,Ailurus_022091,Ailurus_010085,Ailurus_015969,Ailurus_000032,Ailurus_010284,Ailurus_000029,Ailurus_011381,Ailurus_001586,Ailurus_000017,Ailurus_018612,Ailurus_018622,Ailurus_008204,Ailurus_010713,Ailurus_018689,Ailurus_023690,Ailurus_001674,Ailurus_013878,Ailurus_002702,Ailurus_008270,Ailurus_017194,Ailurus_025002,Ailurus_015683,Ailurus_0…
GO:CC	vesicle lumen	GO:0031983	4.47e-05	0.00217033	41	332	Ailurus_010473,Ailurus_020276,Ailurus_000643,Ailurus_025957,Ailurus_022091,Ailurus_010085,Ailurus_015969,Ailurus_000032,Ailurus_010284,Ailurus_000029,Ailurus_011381,Ailurus_001586,Ailurus_000017,Ailurus_018612,Ailurus_018622,Ailurus_008204,Ailurus_010713,Ailurus_018689,Ailurus_023690,Ailurus_001674,Ailurus_013878,Ailurus_002702,Ailurus_008270,Ailurus_017194,Ailurus_025002,Ailurus_015683,Ailurus_0…
GO:CC	bounding membrane of organelle	GO:0098588	0.000104	0.00479578	151	1758	Ailurus_016805,Ailurus_023340,Ailurus_019082,Ailurus_012894,Ailurus_010473,Ailurus_020281,Ailurus_022215,Ailurus_022222,Ailurus_008377,Ailurus_020014,Ailurus_025703,Ailurus_008369,Ailurus_006185,Ailurus_020269,Ailurus_022682,Ailurus_018196,Ailurus_017073,Ailurus_002603,Ailurus_020487,Ailurus_018810,Ailurus_018811,Ailurus_023167,Ailurus_004401,Ailurus_026204,Ailurus_026447,Ailurus_012264,Ailurus_0…
GO:CC	tertiary granule lumen	GO:1904724	0.000123	0.00535518	11	46	Ailurus_020276,Ailurus_000643,Ailurus_015969,Ailurus_000029,Ailurus_018622,Ailurus_005170,Ailurus_001674,Ailurus_000141,Ailurus_026506,Ailurus_018149,Ailurus_007673,
GO:CC	obsolete vacuolar part	GO:0044437	0.000231	0.00959645	47	428	Ailurus_012894,Ailurus_008377,Ailurus_025957,Ailurus_002603,Ailurus_010085,Ailurus_000481,Ailurus_000032,Ailurus_001586,Ailurus_000017,Ailurus_018666,Ailurus_018612,Ailurus_018622,Ailurus_026237,Ailurus_026236,Ailurus_000081,Ailurus_026014,Ailurus_008204,Ailurus_024942,Ailurus_009528,Ailurus_006236,Ailurus_018679,Ailurus_018681,Ailurus_018680,Ailurus_008659,Ailurus_008294,Ailurus_023203,Ailurus_0…
GO:CC	cell leading edge	GO:0031252	0.000245	0.00973199	49	453	Ailurus_012652,Ailurus_010473,Ailurus_020281,Ailurus_020276,Ailurus_022215,Ailurus_006195,Ailurus_013960,Ailurus_018196,Ailurus_008395,Ailurus_023167,Ailurus_000297,Ailurus_000238,Ailurus_000031,Ailurus_000030,Ailurus_011380,Ailurus_027126,Ailurus_027387,Ailurus_008865,Ailurus_026243,Ailurus_004202,Ailurus_008210,Ailurus_019107,Ailurus_008679,Ailurus_019569,Ailurus_018485,Ailurus_016079,Ailurus_0…
GO:CC	cytoplasmic vesicle membrane	GO:0030659	0.000366	0.0133308	62	621	Ailurus_016805,Ailurus_012894,Ailurus_010473,Ailurus_020281,Ailurus_008369,Ailurus_006185,Ailurus_020269,Ailurus_002603,Ailurus_023167,Ailurus_026204,Ailurus_025564,Ailurus_002672,Ailurus_026883,Ailurus_000481,Ailurus_000238,Ailurus_000237,Ailurus_004620,Ailurus_000011,Ailurus_004612,Ailurus_003153,Ailurus_018639,Ailurus_014280,Ailurus_003172,Ailurus_027572,Ailurus_027328,Ailurus_026014,Ailurus_0…
GO:CC	membrane	GO:0016020	0.000412	0.0143986	527	7372	Ailurus_023330,Ailurus_010016,Ailurus_020057,Ailurus_020053,Ailurus_024896,Ailurus_023323,Ailurus_026836,Ailurus_026834,Ailurus_012449,Ailurus_016805,Ailurus_009498,Ailurus_023340,Ailurus_013776,Ailurus_026849,Ailurus_002615,Ailurus_003942,Ailurus_019082,Ailurus_002610,Ailurus_022249,Ailurus_009049,Ailurus_012894,Ailurus_012652,Ailurus_010473,Ailurus_020281,Ailurus_021365,Ailurus_022215,Ailurus_0…
GO:CC	ruffle	GO:0001726	0.000413	0.0138834	26	198	Ailurus_010473,Ailurus_020276,Ailurus_022215,Ailurus_006195,Ailurus_013960,Ailurus_008395,Ailurus_023167,Ailurus_000297,Ailurus_000031,Ailurus_000030,Ailurus_027387,Ailurus_008865,Ailurus_026243,Ailurus_018485,Ailurus_016079,Ailurus_016279,Ailurus_021263,Ailurus_026957,Ailurus_000311,Ailurus_009153,Ailurus_000309,Ailurus_011897,Ailurus_000112,Ailurus_026120,Ailurus_021996,Ailurus_019657,
GO:CC	vacuole	GO:0005773	0.00042	0.0135653	68	700	Ailurus_023330,Ailurus_012894,Ailurus_008377,Ailurus_025957,Ailurus_018196,Ailurus_002603,Ailurus_002698,Ailurus_010085,Ailurus_014686,Ailurus_016870,Ailurus_000481,Ailurus_002655,Ailurus_000238,Ailurus_000032,Ailurus_012223,Ailurus_001586,Ailurus_000017,Ailurus_004612,Ailurus_018666,Ailurus_018639,Ailurus_018612,Ailurus_018622,Ailurus_026237,Ailurus_026236,Ailurus_000081,Ailurus_026014,Ailurus_0…
GO:CC	cell trailing edge	GO:0031254	0.000909	0.0273552	5	13	Ailurus_012652,Ailurus_022999,Ailurus_002754,Ailurus_025422,Ailurus_000112,
GO:CC	uropod	GO:0001931	0.000909	0.0273552	5	13	Ailurus_012652,Ailurus_022999,Ailurus_002754,Ailurus_025422,Ailurus_000112,
GO:CC	phagocytic cup	GO:0001891	0.000996	0.0280421	7	26	Ailurus_000031,Ailurus_000030,Ailurus_008679,Ailurus_000311,Ailurus_000309,Ailurus_000194,Ailurus_000112,
GO:CC	lysosome	GO:0005764	0.00111113	0.0303131	54	547	Ailurus_023330,Ailurus_012894,Ailurus_025957,Ailurus_002603,Ailurus_010085,Ailurus_016870,Ailurus_000481,Ailurus_002655,Ailurus_000238,Ailurus_000032,Ailurus_012223,Ailurus_001586,Ailurus_000017,Ailurus_004612,Ailurus_018666,Ailurus_018639,Ailurus_018612,Ailurus_018622,Ailurus_026237,Ailurus_026236,Ailurus_000081,Ailurus_026014,Ailurus_008811,Ailurus_023600,Ailurus_008204,Ailurus_024942,Ailurus_0…
GO:CC	lytic vacuole	GO:0000323	0.00115804	0.0306354	54	548	Ailurus_023330,Ailurus_012894,Ailurus_025957,Ailurus_002603,Ailurus_010085,Ailurus_016870,Ailurus_000481,Ailurus_002655,Ailurus_000238,Ailurus_000032,Ailurus_012223,Ailurus_001586,Ailurus_000017,Ailurus_004612,Ailurus_018666,Ailurus_018639,Ailurus_018612,Ailurus_018622,Ailurus_026237,Ailurus_026236,Ailurus_000081,Ailurus_026014,Ailurus_008811,Ailurus_023600,Ailurus_008204,Ailurus_024942,Ailurus_0…
GO:CC	endomembrane system	GO:0012505	0.0011886	0.0305191	326	4395	Ailurus_023330,Ailurus_026836,Ailurus_016805,Ailurus_013776,Ailurus_002614,Ailurus_019082,Ailurus_002610,Ailurus_022249,Ailurus_026603,Ailurus_012894,Ailurus_012652,Ailurus_010473,Ailurus_020281,Ailurus_020276,Ailurus_021365,Ailurus_022213,Ailurus_022215,Ailurus_010007,Ailurus_000461,Ailurus_002639,Ailurus_022222,Ailurus_013960,Ailurus_025946,Ailurus_020497,Ailurus_000409,Ailurus_025700,Ailurus_0…
GO:CC	obsolete endosomal part	GO:0044440	0.00147459	0.0367804	40	380	Ailurus_023330,Ailurus_017073,Ailurus_018810,Ailurus_018811,Ailurus_012493,Ailurus_004612,Ailurus_018666,Ailurus_017305,Ailurus_014280,Ailurus_000081,Ailurus_008829,Ailurus_010788,Ailurus_006236,Ailurus_018679,Ailurus_018681,Ailurus_000707,Ailurus_018680,Ailurus_009506,Ailurus_012778,Ailurus_000512,Ailurus_010797,Ailurus_000771,Ailurus_024961,Ailurus_026778,Ailurus_018928,Ailurus_006952,Ailurus_0…
GO:CC	plasma membrane	GO:0005886	0.00191512	0.0464417	352	4815	Ailurus_023330,Ailurus_020053,Ailurus_024896,Ailurus_023323,Ailurus_026836,Ailurus_026834,Ailurus_012449,Ailurus_016805,Ailurus_009498,Ailurus_013776,Ailurus_026849,Ailurus_002615,Ailurus_003942,Ailurus_002610,Ailurus_022249,Ailurus_009049,Ailurus_012894,Ailurus_012652,Ailurus_010473,Ailurus_020281,Ailurus_021365,Ailurus_022215,Ailurus_003970,Ailurus_020051,Ailurus_023318,Ailurus_021373,Ailurus_0…
GO:CC	lamellipodium	GO:0030027	0.00198196	0.0467636	26	220	Ailurus_012652,Ailurus_010473,Ailurus_020276,Ailurus_022215,Ailurus_006195,Ailurus_000238,Ailurus_027126,Ailurus_004202,Ailurus_008210,Ailurus_019107,Ailurus_008679,Ailurus_019569,Ailurus_018698,Ailurus_021263,Ailurus_000311,Ailurus_009153,Ailurus_024973,Ailurus_000309,Ailurus_011897,Ailurus_000772,Ailurus_023026,Ailurus_023027,Ailurus_025422,Ailurus_006391,Ailurus_021996,Ailurus_003098,
GO:CC	cell periphery	GO:0071944	0.00231432	0.0531685	374	5159	Ailurus_023330,Ailurus_020053,Ailurus_024896,Ailurus_023323,Ailurus_026836,Ailurus_026834,Ailurus_012449,Ailurus_016805,Ailurus_009498,Ailurus_013776,Ailurus_026849,Ailurus_002615,Ailurus_003942,Ailurus_002614,Ailurus_002610,Ailurus_022249,Ailurus_009049,Ailurus_012894,Ailurus_012652,Ailurus_010473,Ailurus_020281,Ailurus_025728,Ailurus_020276,Ailurus_021365,Ailurus_022215,Ailurus_003970,Ailurus_0…
GO:CC	stereocilium tip	GO:0032426	0.00273294	0.0611759	6	23	Ailurus_023317,Ailurus_008679,Ailurus_026120,Ailurus_018588,Ailurus_021966,Ailurus_021965,
GO:CC	endosome membrane	GO:0010008	0.00289344	0.0631493	35	333	Ailurus_017073,Ailurus_018810,Ailurus_018811,Ailurus_012493,Ailurus_004612,Ailurus_018666,Ailurus_017305,Ailurus_014280,Ailurus_000081,Ailurus_008829,Ailurus_010788,Ailurus_006236,Ailurus_018679,Ailurus_018681,Ailurus_018680,Ailurus_009506,Ailurus_012778,Ailurus_000512,Ailurus_010797,Ailurus_000771,Ailurus_024961,Ailurus_026778,Ailurus_018928,Ailurus_006952,Ailurus_006953,Ailurus_016716,Ailurus_0…
GO:CC	vacuolar membrane	GO:0005774	0.00323511	0.0688842	30	275	Ailurus_012894,Ailurus_008377,Ailurus_002603,Ailurus_000481,Ailurus_018666,Ailurus_026237,Ailurus_000081,Ailurus_026014,Ailurus_024942,Ailurus_006236,Ailurus_018679,Ailurus_018681,Ailurus_018680,Ailurus_008659,Ailurus_008294,Ailurus_023203,Ailurus_023218,Ailurus_010119,Ailurus_012778,Ailurus_023879,Ailurus_000771,Ailurus_018931,Ailurus_015442,Ailurus_026778,Ailurus_015848,Ailurus_000137,Ailurus_0…
GO:CC	leading edge membrane	GO:0031256	0.00352917	0.0733563	20	161	Ailurus_020281,Ailurus_006195,Ailurus_018196,Ailurus_023167,Ailurus_000297,Ailurus_000031,Ailurus_000030,Ailurus_011380,Ailurus_027126,Ailurus_018485,Ailurus_016079,Ailurus_016279,Ailurus_000311,Ailurus_009153,Ailurus_000309,Ailurus_006952,Ailurus_006953,Ailurus_016716,Ailurus_000112,Ailurus_022623,
GO:CC	focal adhesion	GO:0005925	0.00353868	0.0718434	19	150	Ailurus_010473,Ailurus_021127,Ailurus_013960,Ailurus_016870,Ailurus_025786,Ailurus_004625,Ailurus_004624,Ailurus_000019,Ailurus_005700,Ailurus_027126,Ailurus_004202,Ailurus_000078,Ailurus_008888,Ailurus_011405,Ailurus_010797,Ailurus_025808,Ailurus_023026,Ailurus_023027,Ailurus_000112,
GO:CC	actin cytoskeleton	GO:0015629	0.00372347	0.073877	49	514	Ailurus_000206,Ailurus_019085,Ailurus_010473,Ailurus_020281,Ailurus_021127,Ailurus_020276,Ailurus_009460,Ailurus_004409,Ailurus_004408,Ailurus_009069,Ailurus_025786,Ailurus_015970,Ailurus_000029,Ailurus_027126,Ailurus_027387,Ailurus_008865,Ailurus_026243,Ailurus_000081,Ailurus_018624,Ailurus_018625,Ailurus_000078,Ailurus_025374,Ailurus_008811,Ailurus_008679,Ailurus_018698,Ailurus_022948,Ailurus_0…
GO:CC	obsolete cytoplasmic part	GO:0044444	0.00416622	0.0742267	680	9939	Ailurus_023330,Ailurus_015702,Ailurus_000685,Ailurus_000684,Ailurus_024896,Ailurus_023323,Ailurus_024411,Ailurus_026836,Ailurus_016805,Ailurus_022250,Ailurus_023340,Ailurus_013776,Ailurus_023339,Ailurus_019085,Ailurus_002614,Ailurus_019082,Ailurus_002610,Ailurus_022249,Ailurus_026603,Ailurus_009049,Ailurus_012894,Ailurus_012652,Ailurus_010473,Ailurus_012892,Ailurus_020281,Ailurus_021127,Ailurus_0…
GO:CC	specific granule membrane	GO:0035579	0.00443153	0.0773745	12	79	Ailurus_012894,Ailurus_006185,Ailurus_002603,Ailurus_026204,Ailurus_000481,Ailurus_000237,Ailurus_008234,Ailurus_023203,Ailurus_002754,Ailurus_015442,Ailurus_024105,Ailurus_006136,
GO:CC	obsolete cell-substrate adherens junction	GO:0005924	0.00473341	0.0810248	19	154	Ailurus_010473,Ailurus_021127,Ailurus_013960,Ailurus_016870,Ailurus_025786,Ailurus_004625,Ailurus_004624,Ailurus_000019,Ailurus_005700,Ailurus_027126,Ailurus_004202,Ailurus_000078,Ailurus_008888,Ailurus_011405,Ailurus_010797,Ailurus_025808,Ailurus_023026,Ailurus_023027,Ailurus_000112,
GO:CC	cell-substrate junction	GO:0030055	0.00761422	0.127831	19	161	Ailurus_010473,Ailurus_021127,Ailurus_013960,Ailurus_016870,Ailurus_025786,Ailurus_004625,Ailurus_004624,Ailurus_000019,Ailurus_005700,Ailurus_027126,Ailurus_004202,Ailurus_000078,Ailurus_008888,Ailurus_011405,Ailurus_010797,Ailurus_025808,Ailurus_023026,Ailurus_023027,Ailurus_000112,
GO:CC	obsolete plasma membrane part	GO:0044459	0.0076861	0.126603	200	2658	Ailurus_020053,Ailurus_026836,Ailurus_026834,Ailurus_016805,Ailurus_009498,Ailurus_026849,Ailurus_002615,Ailurus_002610,Ailurus_022249,Ailurus_012652,Ailurus_010473,Ailurus_020281,Ailurus_022215,Ailurus_003970,Ailurus_023318,Ailurus_012879,Ailurus_014819,Ailurus_006195,Ailurus_013960,Ailurus_020497,Ailurus_000409,Ailurus_006185,Ailurus_020269,Ailurus_018196,Ailurus_013947,Ailurus_020480,Ailurus_0…
GO:CC	stereocilium	GO:0032420	0.00797126	0.128869	9	55	Ailurus_023317,Ailurus_009069,Ailurus_008679,Ailurus_000772,Ailurus_015489,Ailurus_026120,Ailurus_018588,Ailurus_021966,Ailurus_021965,
GO:CC	ruffle membrane	GO:0032587	0.00877859	0.13934	12	86	Ailurus_006195,Ailurus_023167,Ailurus_000297,Ailurus_000031,Ailurus_000030,Ailurus_018485,Ailurus_016079,Ailurus_016279,Ailurus_000311,Ailurus_009153,Ailurus_000309,Ailurus_000112,
GO:CC	integrin complex	GO:0008305	0.00924802	0.14417	6	29	Ailurus_002610,Ailurus_013960,Ailurus_018633,Ailurus_015855,Ailurus_008758,Ailurus_008756,
GO:CC	adherens junction	GO:0005912	0.0111674	0.171037	29	288	Ailurus_012652,Ailurus_010473,Ailurus_021127,Ailurus_022215,Ailurus_013960,Ailurus_013947,Ailurus_020002,Ailurus_016870,Ailurus_025786,Ailurus_004625,Ailurus_004624,Ailurus_000019,Ailurus_005700,Ailurus_027126,Ailurus_004202,Ailurus_000078,Ailurus_008210,Ailurus_008888,Ailurus_011405,Ailurus_010797,Ailurus_025808,Ailurus_023026,Ailurus_023027,Ailurus_026306,Ailurus_025422,Ailurus_000112,Ailurus_0…
GO:CC	ficolin-1-rich granule lumen	GO:1904813	0.01339	0.18854	15	124	Ailurus_020276,Ailurus_015969,Ailurus_010284,Ailurus_011381,Ailurus_001586,Ailurus_018622,Ailurus_005170,Ailurus_010713,Ailurus_018689,Ailurus_023690,Ailurus_013878,Ailurus_012737,Ailurus_012736,Ailurus_017194,Ailurus_000141,
GO:CC	tertiary granule membrane	GO:0070821	0.0139334	0.193077	9	60	Ailurus_016805,Ailurus_002603,Ailurus_026204,Ailurus_000237,Ailurus_004612,Ailurus_003153,Ailurus_024793,Ailurus_024105,Ailurus_000623,
GO:CC	azurophil granule lumen	GO:0035578	0.0146768	0.200201	12	92	Ailurus_025957,Ailurus_010085,Ailurus_000032,Ailurus_000017,Ailurus_018612,Ailurus_008204,Ailurus_015683,Ailurus_027862,Ailurus_026161,Ailurus_008750,Ailurus_026340,Ailurus_007673,
GO:CC	protein complex involved in cell adhesion	GO:0098636	0.014978	0.201166	6	32	Ailurus_002610,Ailurus_013960,Ailurus_018633,Ailurus_015855,Ailurus_008758,Ailurus_008756,
GO:CC	phagophore assembly site	GO:0000407	0.014978	0.201166	6	32	Ailurus_018809,Ailurus_012223,Ailurus_014026,Ailurus_023218,Ailurus_004583,Ailurus_018108,
GO:CC	intrinsic component of plasma membrane	GO:0031226	0.0154749	0.201636	125	1615	Ailurus_020053,Ailurus_026836,Ailurus_026834,Ailurus_016805,Ailurus_009498,Ailurus_026849,Ailurus_002615,Ailurus_002610,Ailurus_022249,Ailurus_022215,Ailurus_012879,Ailurus_014819,Ailurus_006195,Ailurus_013960,Ailurus_020497,Ailurus_006185,Ailurus_020269,Ailurus_013947,Ailurus_019010,Ailurus_002603,Ailurus_020002,Ailurus_023754,Ailurus_000294,Ailurus_000288,Ailurus_017977,Ailurus_010076,Ailurus_0…
GO:CC	vacuolar lumen	GO:0005775	0.0166259	0.210354	19	174	Ailurus_025957,Ailurus_010085,Ailurus_000032,Ailurus_001586,Ailurus_000017,Ailurus_018612,Ailurus_018622,Ailurus_026236,Ailurus_008204,Ailurus_024942,Ailurus_009528,Ailurus_006236,Ailurus_009366,Ailurus_015683,Ailurus_027862,Ailurus_026161,Ailurus_008750,Ailurus_026340,Ailurus_007673,
GO:CC	nucleosome	GO:0000786	0.016639	0.204589	5	24	Ailurus_012564,Ailurus_012562,Ailurus_007443,Ailurus_017262,Ailurus_007447,
GO:CC	membrane raft	GO:0045121	0.0172684	0.209379	37	401	Ailurus_023323,Ailurus_002610,Ailurus_022249,Ailurus_012652,Ailurus_006195,Ailurus_006185,Ailurus_013947,Ailurus_000665,Ailurus_010076,Ailurus_016870,Ailurus_000011,Ailurus_018658,Ailurus_027387,Ailurus_018639,Ailurus_018622,Ailurus_004202,Ailurus_005555,Ailurus_018018,Ailurus_022999,Ailurus_000716,Ailurus_012919,Ailurus_009144,Ailurus_014730,Ailurus_024793,Ailurus_012737,Ailurus_012736,Ailurus_0…
GO:CC	membrane microdomain	GO:0098857	0.0172684	0.209379	37	401	Ailurus_023323,Ailurus_002610,Ailurus_022249,Ailurus_012652,Ailurus_006195,Ailurus_006185,Ailurus_013947,Ailurus_000665,Ailurus_010076,Ailurus_016870,Ailurus_000011,Ailurus_018658,Ailurus_027387,Ailurus_018639,Ailurus_018622,Ailurus_004202,Ailurus_005555,Ailurus_018018,Ailurus_022999,Ailurus_000716,Ailurus_012919,Ailurus_009144,Ailurus_014730,Ailurus_024793,Ailurus_012737,Ailurus_012736,Ailurus_0…
GO:CC	endosome	GO:0005768	0.0182072	0.214796	74	903	Ailurus_023330,Ailurus_012652,Ailurus_020497,Ailurus_000409,Ailurus_020269,Ailurus_025957,Ailurus_017073,Ailurus_010686,Ailurus_018810,Ailurus_018811,Ailurus_002698,Ailurus_005995,Ailurus_014686,Ailurus_012493,Ailurus_002681,Ailurus_005706,Ailurus_004612,Ailurus_005700,Ailurus_018666,Ailurus_018639,Ailurus_017305,Ailurus_014280,Ailurus_016225,Ailurus_026244,Ailurus_000081,Ailurus_026457,Ailurus_0…
GO:CC	cytoplasm	GO:0005737	0.0193695	0.225461	765	11426	Ailurus_023330,Ailurus_015702,Ailurus_000685,Ailurus_000684,Ailurus_024896,Ailurus_023323,Ailurus_024411,Ailurus_024898,Ailurus_026836,Ailurus_016805,Ailurus_022250,Ailurus_023340,Ailurus_013776,Ailurus_023339,Ailurus_019085,Ailurus_002614,Ailurus_019082,Ailurus_002610,Ailurus_022249,Ailurus_026603,Ailurus_009049,Ailurus_012894,Ailurus_012652,Ailurus_010473,Ailurus_012892,Ailurus_020281,Ailurus_0…
GO:CC	azurophil granule	GO:0042582	0.0203289	0.233515	16	142	Ailurus_012894,Ailurus_025957,Ailurus_010085,Ailurus_000238,Ailurus_000032,Ailurus_000017,Ailurus_018612,Ailurus_023600,Ailurus_008204,Ailurus_015442,Ailurus_015683,Ailurus_027862,Ailurus_026161,Ailurus_008750,Ailurus_026340,Ailurus_007673,
GO:CC	primary lysosome	GO:0005766	0.0203289	0.233515	16	142	Ailurus_012894,Ailurus_025957,Ailurus_010085,Ailurus_000238,Ailurus_000032,Ailurus_000017,Ailurus_018612,Ailurus_023600,Ailurus_008204,Ailurus_015442,Ailurus_015683,Ailurus_027862,Ailurus_026161,Ailurus_008750,Ailurus_026340,Ailurus_007673,
GO:CC	lytic vacuole membrane	GO:0098852	0.0210255	0.235324	22	215	Ailurus_012894,Ailurus_002603,Ailurus_000481,Ailurus_018666,Ailurus_026237,Ailurus_000081,Ailurus_026014,Ailurus_024942,Ailurus_006236,Ailurus_008659,Ailurus_008294,Ailurus_023203,Ailurus_012778,Ailurus_023879,Ailurus_000771,Ailurus_018931,Ailurus_015442,Ailurus_026778,Ailurus_015848,Ailurus_000137,Ailurus_025011,Ailurus_025009,
GO:CC	lysosomal membrane	GO:0005765	0.0210255	0.235324	22	215	Ailurus_012894,Ailurus_002603,Ailurus_000481,Ailurus_018666,Ailurus_026237,Ailurus_000081,Ailurus_026014,Ailurus_024942,Ailurus_006236,Ailurus_008659,Ailurus_008294,Ailurus_023203,Ailurus_012778,Ailurus_023879,Ailurus_000771,Ailurus_018931,Ailurus_015442,Ailurus_026778,Ailurus_015848,Ailurus_000137,Ailurus_025011,Ailurus_025009,
GO:CC	actomyosin	GO:0042641	0.0233251	0.236777	10	76	Ailurus_010473,Ailurus_021127,Ailurus_004409,Ailurus_004408,Ailurus_000029,Ailurus_008865,Ailurus_018698,Ailurus_026930,Ailurus_023026,Ailurus_023027,
GO:CC	organelle membrane	GO:0031090	0.0236999	0.237816	229	3166	Ailurus_026836,Ailurus_016805,Ailurus_023340,Ailurus_019082,Ailurus_022249,Ailurus_012894,Ailurus_010473,Ailurus_020281,Ailurus_022215,Ailurus_010007,Ailurus_000461,Ailurus_022222,Ailurus_008377,Ailurus_020014,Ailurus_025700,Ailurus_025703,Ailurus_008369,Ailurus_006185,Ailurus_020269,Ailurus_022682,Ailurus_018196,Ailurus_024839,Ailurus_017073,Ailurus_018162,Ailurus_002603,Ailurus_001990,Ailurus_0…
GO:CC	stereocilium bundle	GO:0032421	0.0248201	0.246227	9	66	Ailurus_023317,Ailurus_009069,Ailurus_008679,Ailurus_000772,Ailurus_015489,Ailurus_026120,Ailurus_018588,Ailurus_021966,Ailurus_021965,
GO:CC	endocytic vesicle membrane	GO:0030666	0.0249881	0.245108	14	122	Ailurus_004612,Ailurus_003172,Ailurus_018679,Ailurus_018681,Ailurus_018680,Ailurus_000311,Ailurus_012778,Ailurus_000309,Ailurus_000782,Ailurus_006952,Ailurus_006953,Ailurus_014784,Ailurus_005678,Ailurus_025257,
GO:CC	SCF ubiquitin ligase complex	GO:0019005	0.025994	0.241412	8	56	Ailurus_022250,Ailurus_000065,Ailurus_019171,Ailurus_002753,Ailurus_023890,Ailurus_015422,Ailurus_010822,Ailurus_026364,
GO:CC	cell surface	GO:0009986	0.0335945	0.308715	64	791	Ailurus_026836,Ailurus_003942,Ailurus_002610,Ailurus_022215,Ailurus_023318,Ailurus_014819,Ailurus_006195,Ailurus_013960,Ailurus_020480,Ailurus_008395,Ailurus_025102,Ailurus_000288,Ailurus_017977,Ailurus_025564,Ailurus_004420,Ailurus_026883,Ailurus_016601,Ailurus_002655,Ailurus_000031,Ailurus_000030,Ailurus_009073,Ailurus_027328,Ailurus_014029,Ailurus_018633,Ailurus_018601,Ailurus_006038,Ailurus_0…
GO:CC	integral component of plasma membrane	GO:0005887	0.0348818	0.317206	117	1548	Ailurus_020053,Ailurus_026836,Ailurus_026834,Ailurus_016805,Ailurus_009498,Ailurus_026849,Ailurus_002615,Ailurus_002610,Ailurus_022249,Ailurus_022215,Ailurus_012879,Ailurus_014819,Ailurus_006195,Ailurus_013960,Ailurus_020497,Ailurus_006185,Ailurus_020269,Ailurus_013947,Ailurus_019010,Ailurus_002603,Ailurus_020002,Ailurus_023754,Ailurus_000294,Ailurus_000288,Ailurus_017977,Ailurus_010076,Ailurus_0…
GO:CC	extracellular region	GO:0005576	0.0360618	0.324556	150	2031	Ailurus_023330,Ailurus_023329,Ailurus_024898,Ailurus_022251,Ailurus_002614,Ailurus_010473,Ailurus_025728,Ailurus_020276,Ailurus_022214,Ailurus_022215,Ailurus_003970,Ailurus_023314,Ailurus_000643,Ailurus_006185,Ailurus_025957,Ailurus_013947,Ailurus_001516,Ailurus_008383,Ailurus_013955,Ailurus_020487,Ailurus_020002,Ailurus_000288,Ailurus_022091,Ailurus_026694,Ailurus_018828,Ailurus_025564,Ailurus_0…
GO:CC	Golgi membrane	GO:0000139	0.0417298	0.360695	46	551	Ailurus_019082,Ailurus_022215,Ailurus_022222,Ailurus_025703,Ailurus_020269,Ailurus_018196,Ailurus_026447,Ailurus_012264,Ailurus_000481,Ailurus_012493,Ailurus_000011,Ailurus_006674,Ailurus_015390,Ailurus_000902,Ailurus_008699,Ailurus_009144,Ailurus_014730,Ailurus_000559,Ailurus_000311,Ailurus_012778,Ailurus_020152,Ailurus_026935,Ailurus_012763,Ailurus_000309,Ailurus_008266,Ailurus_008267,Ailurus_0…
GO:CC	cell-cell junction	GO:0005911	0.0435527	0.369141	49	594	Ailurus_020053,Ailurus_026836,Ailurus_026834,Ailurus_012652,Ailurus_010473,Ailurus_021127,Ailurus_022215,Ailurus_020051,Ailurus_013960,Ailurus_020497,Ailurus_018196,Ailurus_013947,Ailurus_020480,Ailurus_020002,Ailurus_016870,Ailurus_025786,Ailurus_004625,Ailurus_004624,Ailurus_000029,Ailurus_000019,Ailurus_005700,Ailurus_027126,Ailurus_027387,Ailurus_004202,Ailurus_026498,Ailurus_000078,Ailurus_0…
GO:CC	actin filament bundle	GO:0032432	0.04388	0.368339	9	73	Ailurus_010473,Ailurus_021127,Ailurus_000029,Ailurus_008865,Ailurus_025374,Ailurus_018698,Ailurus_026930,Ailurus_023026,Ailurus_023027,
GO:CC	Golgi apparatus	GO:0005794	0.0443814	0.368999	106	1404	Ailurus_019082,Ailurus_026603,Ailurus_021365,Ailurus_022215,Ailurus_002639,Ailurus_022222,Ailurus_013960,Ailurus_025946,Ailurus_025703,Ailurus_020269,Ailurus_018196,Ailurus_026693,Ailurus_026204,Ailurus_026447,Ailurus_026205,Ailurus_002698,Ailurus_012264,Ailurus_025564,Ailurus_005995,Ailurus_009057,Ailurus_000481,Ailurus_012493,Ailurus_002655,Ailurus_000031,Ailurus_000030,Ailurus_002681,Ailurus_0…
GO:CC	anchoring junction	GO:0070161	0.0457131	0.376486	49	596	Ailurus_020053,Ailurus_026836,Ailurus_026834,Ailurus_012652,Ailurus_010473,Ailurus_021127,Ailurus_022215,Ailurus_020051,Ailurus_013960,Ailurus_020497,Ailurus_018196,Ailurus_013947,Ailurus_020480,Ailurus_020002,Ailurus_016870,Ailurus_025786,Ailurus_004625,Ailurus_004624,Ailurus_000029,Ailurus_000019,Ailurus_005700,Ailurus_027126,Ailurus_027387,Ailurus_004202,Ailurus_026498,Ailurus_000078,Ailurus_0…
GO:CC	contractile actin filament bundle	GO:0097517	0.0480082	0.388066	8	63	Ailurus_010473,Ailurus_021127,Ailurus_000029,Ailurus_008865,Ailurus_018698,Ailurus_026930,Ailurus_023026,Ailurus_023027,
GO:CC	stress fiber	GO:0001725	0.0480082	0.388066	8	63	Ailurus_010473,Ailurus_021127,Ailurus_000029,Ailurus_008865,Ailurus_018698,Ailurus_026930,Ailurus_023026,Ailurus_023027,
GO:CC	external side of plasma membrane	GO:0009897	0.0492907	0.391189	25	274	Ailurus_023318,Ailurus_014819,Ailurus_006195,Ailurus_013960,Ailurus_000288,Ailurus_017977,Ailurus_025564,Ailurus_027328,Ailurus_006038,Ailurus_006037,Ailurus_019568,Ailurus_024793,Ailurus_022373,Ailurus_012778,Ailurus_009398,Ailurus_010329,Ailurus_016753,Ailurus_015683,Ailurus_014320,Ailurus_004537,Ailurus_014784,Ailurus_004373,Ailurus_027098,Ailurus_011924,Ailurus_017235,
GO:MF	signaling receptor binding	GO:0005102	7.37e-06	0.0110783	154	1660	Ailurus_024898,Ailurus_022249,Ailurus_012652,Ailurus_010473,Ailurus_022214,Ailurus_022215,Ailurus_003970,Ailurus_024891,Ailurus_013994,Ailurus_020051,Ailurus_006195,Ailurus_013960,Ailurus_000409,Ailurus_025957,Ailurus_018196,Ailurus_022205,Ailurus_013947,Ailurus_001516,Ailurus_020487,Ailurus_020002,Ailurus_023172,Ailurus_000294,Ailurus_025103,Ailurus_000288,Ailurus_000286,Ailurus_018826,Ailurus_0…
GO:MF	tumor necrosis factor-activated receptor activity	GO:0005031	3.47e-05	0.0260621	8	21	Ailurus_006185,Ailurus_006038,Ailurus_006037,Ailurus_019591,Ailurus_014732,Ailurus_014730,Ailurus_022373,Ailurus_006081,
GO:MF	death receptor activity	GO:0005035	3.47e-05	0.0260621	8	21	Ailurus_006185,Ailurus_006038,Ailurus_006037,Ailurus_019591,Ailurus_014732,Ailurus_014730,Ailurus_022373,Ailurus_006081,
GO:MF	carbohydrate binding	GO:0030246	6.41e-05	0.0241123	21	124	Ailurus_014819,Ailurus_020002,Ailurus_010284,Ailurus_001586,Ailurus_003153,Ailurus_027330,Ailurus_027328,Ailurus_008699,Ailurus_012778,Ailurus_001674,Ailurus_018099,Ailurus_010329,Ailurus_012391,Ailurus_025458,Ailurus_024109,Ailurus_026158,Ailurus_027240,Ailurus_006138,Ailurus_017288,Ailurus_018594,Ailurus_006136,
GO:MF	monosaccharide binding	GO:0048029	0.000177	0.0533098	12	54	Ailurus_010284,Ailurus_001586,Ailurus_027330,Ailurus_027328,Ailurus_010329,Ailurus_025458,Ailurus_024109,Ailurus_026158,Ailurus_027240,Ailurus_017288,Ailurus_018594,Ailurus_006136,
GO:MF	protein binding	GO:0005515	0.0005	0.107386	524	7147	Ailurus_023330,Ailurus_015702,Ailurus_000206,Ailurus_020053,Ailurus_000685,Ailurus_000684,Ailurus_024896,Ailurus_024898,Ailurus_010029,Ailurus_022250,Ailurus_022251,Ailurus_021163,Ailurus_013776,Ailurus_023339,Ailurus_026849,Ailurus_019085,Ailurus_019084,Ailurus_002614,Ailurus_019082,Ailurus_002610,Ailurus_022249,Ailurus_012652,Ailurus_010473,Ailurus_012892,Ailurus_020281,Ailurus_026816,Ailurus_0…
GO:MF	enzyme binding	GO:0019899	0.00111899	0.152996	206	2556	Ailurus_015702,Ailurus_022250,Ailurus_023339,Ailurus_026849,Ailurus_002610,Ailurus_022249,Ailurus_012652,Ailurus_012892,Ailurus_022215,Ailurus_003970,Ailurus_024891,Ailurus_022227,Ailurus_025946,Ailurus_000409,Ailurus_006185,Ailurus_010462,Ailurus_018196,Ailurus_022205,Ailurus_003936,Ailurus_002607,Ailurus_000665,Ailurus_010686,Ailurus_020005,Ailurus_020487,Ailurus_000656,Ailurus_023172,Ailurus_0…
GO:MF	protease binding	GO:0002020	0.00160583	0.201264	20	146	Ailurus_023339,Ailurus_012652,Ailurus_020487,Ailurus_022091,Ailurus_018658,Ailurus_010713,Ailurus_009144,Ailurus_014730,Ailurus_000523,Ailurus_012737,Ailurus_012736,Ailurus_022308,Ailurus_016753,Ailurus_025422,Ailurus_024795,Ailurus_017216,Ailurus_008750,Ailurus_026599,Ailurus_018151,Ailurus_010868,
GO:MF	Notch binding	GO:0005112	0.00252475	0.27123	6	22	Ailurus_022214,Ailurus_022215,Ailurus_013947,Ailurus_023191,Ailurus_023192,Ailurus_012763,
GO:MF	interleukin-1 receptor binding	GO:0005149	0.00252475	0.27123	6	22	Ailurus_017305,Ailurus_018612,Ailurus_016078,Ailurus_008888,Ailurus_000771,Ailurus_024186,
GO:MF	histone deacetylase activity	GO:0004407	0.00289465	0.241864	9	46	Ailurus_022227,Ailurus_025946,Ailurus_004409,Ailurus_004408,Ailurus_026271,Ailurus_006250,Ailurus_015665,Ailurus_000126,Ailurus_018567,
GO:MF	signaling adaptor activity	GO:0035591	0.00295388	0.222132	16	112	Ailurus_024896,Ailurus_022076,Ailurus_025786,Ailurus_002669,Ailurus_011397,Ailurus_017310,Ailurus_008865,Ailurus_007141,Ailurus_008275,Ailurus_025808,Ailurus_024969,Ailurus_024961,Ailurus_023026,Ailurus_023027,Ailurus_019679,Ailurus_027044,
GO:MF	acylglycerol O-acyltransferase activity	GO:0016411	0.00296409	0.212285	7	30	Ailurus_022213,Ailurus_026693,Ailurus_008234,Ailurus_027402,Ailurus_004547,Ailurus_019629,Ailurus_017298,
GO:MF	phosphatidylinositol-3,4-bisphosphate binding	GO:0043325	0.00322631	0.220562	6	23	Ailurus_023167,Ailurus_008811,Ailurus_016279,Ailurus_011897,Ailurus_024575,Ailurus_019679,
GO:MF	serine-type peptidase activity	GO:0008236	0.00345367	0.22584	19	145	Ailurus_020057,Ailurus_026836,Ailurus_023339,Ailurus_008383,Ailurus_026694,Ailurus_010085,Ailurus_002684,Ailurus_000017,Ailurus_018622,Ailurus_000082,Ailurus_004469,Ailurus_009144,Ailurus_008291,Ailurus_011400,Ailurus_027862,Ailurus_024105,Ailurus_002573,Ailurus_018149,Ailurus_016187,
GO:MF	serine-type endopeptidase activity	GO:0004252	0.00358455	0.224632	15	104	Ailurus_020057,Ailurus_026836,Ailurus_023339,Ailurus_008383,Ailurus_026694,Ailurus_010085,Ailurus_018622,Ailurus_004469,Ailurus_009144,Ailurus_008291,Ailurus_011400,Ailurus_024105,Ailurus_002573,Ailurus_018149,Ailurus_016187,
GO:MF	histone deacetylase binding	GO:0042826	0.00361211	0.217304	18	135	Ailurus_022227,Ailurus_025946,Ailurus_000409,Ailurus_004409,Ailurus_004408,Ailurus_025344,Ailurus_023191,Ailurus_023192,Ailurus_024910,Ailurus_021890,Ailurus_025825,Ailurus_012737,Ailurus_012736,Ailurus_024956,Ailurus_024955,Ailurus_015665,Ailurus_025040,Ailurus_024805,
GO:MF	polysaccharide binding	GO:0030247	0.00406288	0.235022	5	17	Ailurus_003153,Ailurus_012778,Ailurus_001674,Ailurus_018099,Ailurus_012391,
GO:MF	retinoid X receptor binding	GO:0046965	0.00406341	0.226347	6	24	Ailurus_013994,Ailurus_011382,Ailurus_023191,Ailurus_023192,Ailurus_016016,Ailurus_014126,
GO:MF	endopeptidase activity	GO:0004175	0.0042903	0.23045	32	295	Ailurus_015702,Ailurus_023329,Ailurus_020057,Ailurus_026836,Ailurus_023339,Ailurus_008383,Ailurus_020005,Ailurus_020487,Ailurus_000656,Ailurus_004401,Ailurus_026694,Ailurus_010085,Ailurus_009073,Ailurus_018622,Ailurus_000081,Ailurus_004469,Ailurus_009144,Ailurus_008291,Ailurus_008282,Ailurus_023217,Ailurus_011400,Ailurus_000300,Ailurus_017194,Ailurus_024951,Ailurus_024105,Ailurus_002573,Ailurus_0…
GO:MF	binding	GO:0005488	0.00432765	0.224441	692	9879	Ailurus_023330,Ailurus_015702,Ailurus_000206,Ailurus_020053,Ailurus_000685,Ailurus_000684,Ailurus_024896,Ailurus_024898,Ailurus_010029,Ailurus_022250,Ailurus_023340,Ailurus_022251,Ailurus_021163,Ailurus_013776,Ailurus_023339,Ailurus_026849,Ailurus_002615,Ailurus_019085,Ailurus_019084,Ailurus_002614,Ailurus_019082,Ailurus_002610,Ailurus_022249,Ailurus_009049,Ailurus_012652,Ailurus_010473,Ailurus_0…
GO:MF	protein deacetylase activity	GO:0033558	0.00451589	0.174151	9	49	Ailurus_022227,Ailurus_025946,Ailurus_004409,Ailurus_004408,Ailurus_026271,Ailurus_006250,Ailurus_015665,Ailurus_000126,Ailurus_018567,
GO:MF	deacetylase activity	GO:0019213	0.00454107	0.170744	10	58	Ailurus_022227,Ailurus_008378,Ailurus_025946,Ailurus_004409,Ailurus_004408,Ailurus_026271,Ailurus_006250,Ailurus_015665,Ailurus_000126,Ailurus_018567,
GO:MF	molecular adaptor activity	GO:0060090	0.00505108	0.180877	35	334	Ailurus_024896,Ailurus_013776,Ailurus_010473,Ailurus_020269,Ailurus_023167,Ailurus_022076,Ailurus_022285,Ailurus_025786,Ailurus_002669,Ailurus_011397,Ailurus_022254,Ailurus_005700,Ailurus_017310,Ailurus_008865,Ailurus_027572,Ailurus_026243,Ailurus_007141,Ailurus_021890,Ailurus_009153,Ailurus_008275,Ailurus_025808,Ailurus_024969,Ailurus_024961,Ailurus_023026,Ailurus_023027,Ailurus_009812,Ailurus_0…
GO:MF	serine hydrolase activity	GO:0017171	0.00540217	0.18895	19	151	Ailurus_020057,Ailurus_026836,Ailurus_023339,Ailurus_008383,Ailurus_026694,Ailurus_010085,Ailurus_002684,Ailurus_000017,Ailurus_018622,Ailurus_000082,Ailurus_004469,Ailurus_009144,Ailurus_008291,Ailurus_011400,Ailurus_027862,Ailurus_024105,Ailurus_002573,Ailurus_018149,Ailurus_016187,
GO:MF	small GTPase binding	GO:0031267	0.00571815	0.195457	52	547	Ailurus_015702,Ailurus_003970,Ailurus_024891,Ailurus_000409,Ailurus_010686,Ailurus_018810,Ailurus_018811,Ailurus_016652,Ailurus_002698,Ailurus_011155,Ailurus_002655,Ailurus_000236,Ailurus_015970,Ailurus_005586,Ailurus_027110,Ailurus_017310,Ailurus_016225,Ailurus_021810,Ailurus_006011,Ailurus_021263,Ailurus_023218,Ailurus_026965,Ailurus_009153,Ailurus_021261,Ailurus_024985,Ailurus_020114,Ailurus_0…
GO:MF	hydrolase activity, acting on carbon-nitrogen (but not peptide) bonds	GO:0016810	0.00573526	0.191685	18	141	Ailurus_022227,Ailurus_008378,Ailurus_025946,Ailurus_010462,Ailurus_004409,Ailurus_004408,Ailurus_026271,Ailurus_018645,Ailurus_008207,Ailurus_012728,Ailurus_008221,Ailurus_006250,Ailurus_006241,Ailurus_006242,Ailurus_015665,Ailurus_000126,Ailurus_026531,Ailurus_018567,
GO:MF	protein-macromolecule adaptor activity	GO:0030674	0.00574999	0.188	31	289	Ailurus_024896,Ailurus_013776,Ailurus_010473,Ailurus_020269,Ailurus_023167,Ailurus_022076,Ailurus_022285,Ailurus_025786,Ailurus_002669,Ailurus_011397,Ailurus_017310,Ailurus_008865,Ailurus_027572,Ailurus_026243,Ailurus_007141,Ailurus_021890,Ailurus_009153,Ailurus_008275,Ailurus_025808,Ailurus_024969,Ailurus_024961,Ailurus_023026,Ailurus_023027,Ailurus_009812,Ailurus_025080,Ailurus_027449,Ailurus_0…
GO:MF	G protein-coupled receptor binding	GO:0001664	0.00578609	0.185155	32	301	Ailurus_024891,Ailurus_001516,Ailurus_000286,Ailurus_004420,Ailurus_025533,Ailurus_000097,Ailurus_000096,Ailurus_000716,Ailurus_000561,Ailurus_000311,Ailurus_000523,Ailurus_012737,Ailurus_012736,Ailurus_000309,Ailurus_016753,Ailurus_018709,Ailurus_006952,Ailurus_006953,Ailurus_015868,Ailurus_023016,Ailurus_000146,Ailurus_022134,Ailurus_004742,Ailurus_005830,Ailurus_000135,Ailurus_025080,Ailurus_0…
GO:MF	GTPase binding	GO:0051020	0.00628446	0.18533	59	639	Ailurus_015702,Ailurus_026849,Ailurus_003970,Ailurus_024891,Ailurus_000409,Ailurus_010686,Ailurus_018810,Ailurus_018811,Ailurus_016652,Ailurus_002698,Ailurus_011155,Ailurus_002655,Ailurus_000236,Ailurus_015970,Ailurus_005586,Ailurus_027110,Ailurus_017310,Ailurus_016225,Ailurus_021810,Ailurus_019104,Ailurus_008895,Ailurus_006011,Ailurus_000707,Ailurus_021263,Ailurus_026957,Ailurus_023218,Ailurus_0…
GO:MF	integrin binding	GO:0005178	0.00663607	0.191935	18	143	Ailurus_010473,Ailurus_003970,Ailurus_020051,Ailurus_013960,Ailurus_000294,Ailurus_000288,Ailurus_000286,Ailurus_018601,Ailurus_009398,Ailurus_024951,Ailurus_000781,Ailurus_023026,Ailurus_023027,Ailurus_015633,Ailurus_024105,Ailurus_015855,Ailurus_027006,Ailurus_017038,
GO:MF	signaling receptor complex adaptor activity	GO:0030159	0.00670956	0.1904	8	43	Ailurus_022076,Ailurus_011397,Ailurus_008865,Ailurus_024961,Ailurus_023026,Ailurus_023027,Ailurus_019679,Ailurus_027044,
GO:MF	lipid binding	GO:0008289	0.00761454	0.212079	59	645	Ailurus_026849,Ailurus_022249,Ailurus_020281,Ailurus_021365,Ailurus_022205,Ailurus_017073,Ailurus_001990,Ailurus_023754,Ailurus_023172,Ailurus_001135,Ailurus_023167,Ailurus_001134,Ailurus_000286,Ailurus_018639,Ailurus_014280,Ailurus_003172,Ailurus_000098,Ailurus_001187,Ailurus_025371,Ailurus_008811,Ailurus_008699,Ailurus_023600,Ailurus_008234,Ailurus_019569,Ailurus_006236,Ailurus_018686,Ailurus_0…
GO:MF	O-acyltransferase activity	GO:0008374	0.00768484	0.210145	9	53	Ailurus_022213,Ailurus_026693,Ailurus_008234,Ailurus_022123,Ailurus_027402,Ailurus_004547,Ailurus_019629,Ailurus_017298,Ailurus_023961,
GO:MF	sequence-specific DNA binding	GO:0043565	0.0086087	0.223233	89	1045	Ailurus_024898,Ailurus_010029,Ailurus_019084,Ailurus_022215,Ailurus_009275,Ailurus_013994,Ailurus_021373,Ailurus_022220,Ailurus_022227,Ailurus_013965,Ailurus_020257,Ailurus_025946,Ailurus_022205,Ailurus_004409,Ailurus_004408,Ailurus_025344,Ailurus_025121,Ailurus_018826,Ailurus_018828,Ailurus_027521,Ailurus_016831,Ailurus_012009,Ailurus_021165,Ailurus_020092,Ailurus_000014,Ailurus_027143,Ailurus_0…
GO:MF	obsolete SH3/SH2 adaptor activity	GO:0005070	0.00869228	0.221579	9	54	Ailurus_024896,Ailurus_022076,Ailurus_025786,Ailurus_002669,Ailurus_017310,Ailurus_008865,Ailurus_007141,Ailurus_025808,Ailurus_024969,
GO:MF	hydrolase activity, acting on carbon-nitrogen (but not peptide) bonds, in linear amides	GO:0016811	0.0093626	0.234689	12	84	Ailurus_022227,Ailurus_008378,Ailurus_025946,Ailurus_004409,Ailurus_004408,Ailurus_026271,Ailurus_018645,Ailurus_006250,Ailurus_015665,Ailurus_000126,Ailurus_026531,Ailurus_018567,
GO:MF	retinoic acid receptor binding	GO:0042974	0.00999893	0.246531	7	37	Ailurus_013994,Ailurus_022205,Ailurus_011382,Ailurus_023191,Ailurus_023192,Ailurus_016016,Ailurus_014126,
GO:MF	enzyme regulator activity	GO:0030234	0.0101619	0.246509	104	1255	Ailurus_015702,Ailurus_026849,Ailurus_019085,Ailurus_009049,Ailurus_012892,Ailurus_020276,Ailurus_022215,Ailurus_003970,Ailurus_024891,Ailurus_022222,Ailurus_023314,Ailurus_025978,Ailurus_000665,Ailurus_010686,Ailurus_013955,Ailurus_018826,Ailurus_016652,Ailurus_002698,Ailurus_011155,Ailurus_011397,Ailurus_002655,Ailurus_000236,Ailurus_000032,Ailurus_025772,Ailurus_015970,Ailurus_002677,Ailurus_0…
GO:MF	oxidoreductase activity, acting on single donors with incorporation of molecular oxygen, incorporation of two atoms of oxygen	GO:0016702	0.0107068	0.255603	5	21	Ailurus_025133,Ailurus_018486,Ailurus_023690,Ailurus_023404,Ailurus_027062,
GO:MF	ion binding	GO:0043167	0.0112246	0.263777	178	2289	Ailurus_023330,Ailurus_000206,Ailurus_024898,Ailurus_023340,Ailurus_026849,Ailurus_002615,Ailurus_009049,Ailurus_020281,Ailurus_021365,Ailurus_022214,Ailurus_023314,Ailurus_020261,Ailurus_008369,Ailurus_008366,Ailurus_008364,Ailurus_018196,Ailurus_022205,Ailurus_020480,Ailurus_022657,Ailurus_017073,Ailurus_002603,Ailurus_012628,Ailurus_001990,Ailurus_020487,Ailurus_000650,Ailurus_000656,Ailurus_0…
GO:MF	RNA polymerase II transcription regulatory region sequence-specific DNA binding	GO:0000977	0.0119643	0.272641	61	686	Ailurus_024898,Ailurus_010029,Ailurus_019084,Ailurus_022215,Ailurus_009275,Ailurus_013994,Ailurus_021373,Ailurus_022227,Ailurus_020257,Ailurus_025946,Ailurus_022205,Ailurus_004409,Ailurus_004408,Ailurus_018828,Ailurus_027521,Ailurus_012009,Ailurus_021165,Ailurus_020092,Ailurus_027143,Ailurus_027137,Ailurus_007747,Ailurus_027105,Ailurus_014050,Ailurus_023191,Ailurus_023192,Ailurus_012967,Ailurus_0…
GO:MF	calcium ion binding	GO:0005509	0.012401	0.278374	38	392	Ailurus_023330,Ailurus_022214,Ailurus_023314,Ailurus_008366,Ailurus_002603,Ailurus_020487,Ailurus_023172,Ailurus_009069,Ailurus_009057,Ailurus_024085,Ailurus_006207,Ailurus_025371,Ailurus_026215,Ailurus_023600,Ailurus_018686,Ailurus_006241,Ailurus_018693,Ailurus_018691,Ailurus_012564,Ailurus_024994,Ailurus_024996,Ailurus_024999,Ailurus_009153,Ailurus_002702,Ailurus_012763,Ailurus_025002,Ailurus_0…
GO:MF	DNA binding	GO:0003677	0.0124968	0.276399	122	1512	Ailurus_024898,Ailurus_010029,Ailurus_023340,Ailurus_019084,Ailurus_022215,Ailurus_009275,Ailurus_013994,Ailurus_021373,Ailurus_022220,Ailurus_022227,Ailurus_013965,Ailurus_020257,Ailurus_025946,Ailurus_008366,Ailurus_022205,Ailurus_012628,Ailurus_000650,Ailurus_004409,Ailurus_004408,Ailurus_025344,Ailurus_025121,Ailurus_018826,Ailurus_018828,Ailurus_027521,Ailurus_016831,Ailurus_012009,Ailurus_0…
GO:MF	oxidoreductase activity, acting on single donors with incorporation of molecular oxygen	GO:0016701	0.0131133	0.266518	5	22	Ailurus_025133,Ailurus_018486,Ailurus_023690,Ailurus_023404,Ailurus_027062,
GO:MF	phosphatidylinositol bisphosphate binding	GO:1902936	0.0133011	0.266731	15	120	Ailurus_021365,Ailurus_017073,Ailurus_023167,Ailurus_018639,Ailurus_008811,Ailurus_006236,Ailurus_016279,Ailurus_011897,Ailurus_000772,Ailurus_024575,Ailurus_004742,Ailurus_025043,Ailurus_006391,Ailurus_019679,Ailurus_018108,
GO:MF	GTPase activator activity	GO:0005096	0.0138866	0.274809	49	535	Ailurus_015702,Ailurus_026849,Ailurus_009049,Ailurus_003970,Ailurus_024891,Ailurus_010686,Ailurus_016652,Ailurus_002698,Ailurus_011155,Ailurus_011397,Ailurus_002655,Ailurus_000236,Ailurus_000032,Ailurus_025772,Ailurus_015970,Ailurus_002677,Ailurus_005586,Ailurus_027110,Ailurus_017310,Ailurus_021810,Ailurus_006011,Ailurus_000707,Ailurus_021263,Ailurus_026957,Ailurus_000581,Ailurus_024985,Ailurus_0…
GO:MF	DNA-binding transcription repressor activity	GO:0001217	0.0142271	0.277891	26	248	Ailurus_024898,Ailurus_019084,Ailurus_022227,Ailurus_020257,Ailurus_025344,Ailurus_018828,Ailurus_027521,Ailurus_021165,Ailurus_020092,Ailurus_027143,Ailurus_007747,Ailurus_026272,Ailurus_005792,Ailurus_012965,Ailurus_008402,Ailurus_016016,Ailurus_013493,Ailurus_026569,Ailurus_000123,Ailurus_002538,Ailurus_021293,Ailurus_024318,Ailurus_001930,Ailurus_018591,Ailurus_027041,Ailurus_017246,
GO:MF	DNA-binding transcription repressor activity, RNA polymerase II-specific	GO:0001227	0.0142271	0.277891	26	248	Ailurus_024898,Ailurus_019084,Ailurus_022227,Ailurus_020257,Ailurus_025344,Ailurus_018828,Ailurus_027521,Ailurus_021165,Ailurus_020092,Ailurus_027143,Ailurus_007747,Ailurus_026272,Ailurus_005792,Ailurus_012965,Ailurus_008402,Ailurus_016016,Ailurus_013493,Ailurus_026569,Ailurus_000123,Ailurus_002538,Ailurus_021293,Ailurus_024318,Ailurus_001930,Ailurus_018591,Ailurus_027041,Ailurus_017246,
GO:MF	GTPase regulator activity	GO:0030695	0.0148585	0.279339	51	563	Ailurus_015702,Ailurus_026849,Ailurus_009049,Ailurus_003970,Ailurus_024891,Ailurus_022222,Ailurus_010686,Ailurus_016652,Ailurus_002698,Ailurus_011155,Ailurus_011397,Ailurus_002655,Ailurus_000236,Ailurus_000032,Ailurus_025772,Ailurus_015970,Ailurus_002677,Ailurus_005586,Ailurus_026283,Ailurus_027110,Ailurus_017310,Ailurus_021810,Ailurus_006011,Ailurus_000707,Ailurus_021263,Ailurus_026957,Ailurus_0…
GO:MF	transcription corepressor activity	GO:0003714	0.0149187	0.277009	26	249	Ailurus_024898,Ailurus_002648,Ailurus_025946,Ailurus_004409,Ailurus_004408,Ailurus_002663,Ailurus_027142,Ailurus_007747,Ailurus_027105,Ailurus_023191,Ailurus_023192,Ailurus_016016,Ailurus_006074,Ailurus_025825,Ailurus_012737,Ailurus_012736,Ailurus_024963,Ailurus_000126,Ailurus_000358,Ailurus_021293,Ailurus_024318,Ailurus_018754,Ailurus_006156,Ailurus_023947,Ailurus_023948,Ailurus_027041,
GO:MF	protein serine/threonine kinase inhibitor activity	GO:0030291	0.0149523	0.274247	6	31	Ailurus_012892,Ailurus_025978,Ailurus_000665,Ailurus_009153,Ailurus_000302,Ailurus_025039,
GO:MF	transcription cis-regulatory region binding	GO:0000976	0.0187675	0.32444	72	849	Ailurus_024898,Ailurus_010029,Ailurus_019084,Ailurus_022215,Ailurus_009275,Ailurus_013994,Ailurus_021373,Ailurus_022220,Ailurus_022227,Ailurus_013965,Ailurus_020257,Ailurus_025946,Ailurus_022205,Ailurus_004409,Ailurus_004408,Ailurus_018826,Ailurus_018828,Ailurus_027521,Ailurus_016831,Ailurus_012009,Ailurus_021165,Ailurus_020092,Ailurus_027143,Ailurus_027137,Ailurus_007747,Ailurus_027105,Ailurus_0…
GO:MF	solute:proton symporter activity	GO:0015295	0.0189639	0.32411	5	24	Ailurus_008172,Ailurus_023203,Ailurus_002727,Ailurus_018931,Ailurus_022195,
GO:MF	transcription regulatory region nucleic acid binding	GO:0001067	0.0206553	0.349052	72	853	Ailurus_024898,Ailurus_010029,Ailurus_019084,Ailurus_022215,Ailurus_009275,Ailurus_013994,Ailurus_021373,Ailurus_022220,Ailurus_022227,Ailurus_013965,Ailurus_020257,Ailurus_025946,Ailurus_022205,Ailurus_004409,Ailurus_004408,Ailurus_018826,Ailurus_018828,Ailurus_027521,Ailurus_016831,Ailurus_012009,Ailurus_021165,Ailurus_020092,Ailurus_027143,Ailurus_027137,Ailurus_007747,Ailurus_027105,Ailurus_0…
GO:MF	DNA-binding transcription factor activity, RNA polymerase II-specific	GO:0000981	0.0208272	0.348045	103	1276	Ailurus_024898,Ailurus_010029,Ailurus_019084,Ailurus_009275,Ailurus_013994,Ailurus_021373,Ailurus_022220,Ailurus_022227,Ailurus_013965,Ailurus_020257,Ailurus_025946,Ailurus_022205,Ailurus_025344,Ailurus_018828,Ailurus_027521,Ailurus_002480,Ailurus_027513,Ailurus_027517,Ailurus_016831,Ailurus_004606,Ailurus_002663,Ailurus_012009,Ailurus_021167,Ailurus_021165,Ailurus_020092,Ailurus_027143,Ailurus_0…
GO:MF	peptidase activity	GO:0008233	0.0213238	0.352428	44	484	Ailurus_015702,Ailurus_023329,Ailurus_020057,Ailurus_026836,Ailurus_009018,Ailurus_023339,Ailurus_009276,Ailurus_008383,Ailurus_020005,Ailurus_020487,Ailurus_000656,Ailurus_004401,Ailurus_004402,Ailurus_026694,Ailurus_010085,Ailurus_002684,Ailurus_009073,Ailurus_000017,Ailurus_018622,Ailurus_000082,Ailurus_000081,Ailurus_027305,Ailurus_004469,Ailurus_018843,Ailurus_009144,Ailurus_008291,Ailurus_0…
GO:MF	ubiquitin protein ligase binding	GO:0031625	0.0216893	0.354572	36	382	Ailurus_022249,Ailurus_012892,Ailurus_006185,Ailurus_002607,Ailurus_000665,Ailurus_020005,Ailurus_000656,Ailurus_000065,Ailurus_014686,Ailurus_022285,Ailurus_021165,Ailurus_012223,Ailurus_022265,Ailurus_018612,Ailurus_004202,Ailurus_014029,Ailurus_018843,Ailurus_019104,Ailurus_014732,Ailurus_019171,Ailurus_026941,Ailurus_006074,Ailurus_012737,Ailurus_012736,Ailurus_008275,Ailurus_006081,Ailurus_0…
GO:MF	RNA polymerase II cis-regulatory region sequence-specific DNA binding	GO:0000978	0.0220437	0.356492	46	511	Ailurus_024898,Ailurus_010029,Ailurus_019084,Ailurus_022215,Ailurus_009275,Ailurus_022227,Ailurus_025946,Ailurus_022205,Ailurus_004409,Ailurus_004408,Ailurus_018828,Ailurus_027521,Ailurus_012009,Ailurus_021165,Ailurus_020092,Ailurus_027143,Ailurus_027137,Ailurus_007747,Ailurus_027105,Ailurus_012967,Ailurus_012965,Ailurus_024910,Ailurus_021890,Ailurus_007565,Ailurus_019174,Ailurus_009395,Ailurus_0…
GO:MF	phosphatidylinositol phosphate binding	GO:1901981	0.0234481	0.37517	18	163	Ailurus_021365,Ailurus_017073,Ailurus_023167,Ailurus_018639,Ailurus_008811,Ailurus_019569,Ailurus_006236,Ailurus_016279,Ailurus_011897,Ailurus_000772,Ailurus_026778,Ailurus_024575,Ailurus_004742,Ailurus_025059,Ailurus_025043,Ailurus_006391,Ailurus_019679,Ailurus_018108,
GO:MF	ubiquitin binding	GO:0043130	0.0241283	0.381988	10	74	Ailurus_016827,Ailurus_012223,Ailurus_018612,Ailurus_018843,Ailurus_008224,Ailurus_009506,Ailurus_016925,Ailurus_000512,Ailurus_017216,Ailurus_004585,
GO:MF	monocarboxylic acid binding	GO:0033293	0.0262439	0.362118	10	75	Ailurus_026849,Ailurus_022205,Ailurus_023754,Ailurus_010284,Ailurus_008234,Ailurus_025825,Ailurus_025002,Ailurus_005462,Ailurus_025004,Ailurus_014126,
GO:MF	sequence-specific double-stranded DNA binding	GO:1990837	0.0281566	0.378103	73	880	Ailurus_024898,Ailurus_010029,Ailurus_019084,Ailurus_022215,Ailurus_009275,Ailurus_013994,Ailurus_021373,Ailurus_022220,Ailurus_022227,Ailurus_013965,Ailurus_020257,Ailurus_025946,Ailurus_022205,Ailurus_004409,Ailurus_004408,Ailurus_018826,Ailurus_018828,Ailurus_027521,Ailurus_016831,Ailurus_012009,Ailurus_021165,Ailurus_020092,Ailurus_027143,Ailurus_027137,Ailurus_007747,Ailurus_027105,Ailurus_0…
GO:MF	GO:MF regulator	GO:0098772	0.0286751	0.381659	130	1670	Ailurus_015702,Ailurus_020053,Ailurus_024898,Ailurus_026834,Ailurus_026849,Ailurus_019085,Ailurus_009049,Ailurus_012892,Ailurus_020276,Ailurus_022215,Ailurus_003970,Ailurus_024891,Ailurus_022222,Ailurus_023314,Ailurus_025978,Ailurus_025957,Ailurus_000665,Ailurus_010686,Ailurus_013955,Ailurus_020487,Ailurus_025103,Ailurus_018826,Ailurus_016652,Ailurus_002698,Ailurus_011152,Ailurus_011155,Ailurus_0…
GO:MF	carbohydrate transmembrane transporter activity	GO:0015144	0.0298833	0.39425	6	36	Ailurus_008172,Ailurus_009581,Ailurus_024972,Ailurus_002727,Ailurus_022195,Ailurus_006136,
GO:MF	cis-regulatory region sequence-specific DNA binding	GO:0000987	0.0327919	0.414445	48	551	Ailurus_024898,Ailurus_010029,Ailurus_019084,Ailurus_022215,Ailurus_009275,Ailurus_022227,Ailurus_013965,Ailurus_025946,Ailurus_022205,Ailurus_004409,Ailurus_004408,Ailurus_018828,Ailurus_027521,Ailurus_012009,Ailurus_021165,Ailurus_020092,Ailurus_027143,Ailurus_027137,Ailurus_007747,Ailurus_027105,Ailurus_012967,Ailurus_012965,Ailurus_024910,Ailurus_021890,Ailurus_007565,Ailurus_019174,Ailurus_0…
GO:MF	DNA-binding transcription factor activity	GO:0003700	0.0328781	0.412072	109	1384	Ailurus_024898,Ailurus_010029,Ailurus_019084,Ailurus_002648,Ailurus_022215,Ailurus_000224,Ailurus_009275,Ailurus_013994,Ailurus_021373,Ailurus_022220,Ailurus_022227,Ailurus_013965,Ailurus_020257,Ailurus_025946,Ailurus_022205,Ailurus_025344,Ailurus_018828,Ailurus_027521,Ailurus_002480,Ailurus_027513,Ailurus_027517,Ailurus_016831,Ailurus_004606,Ailurus_002663,Ailurus_012009,Ailurus_021167,Ailurus_0…
GO:MF	phospholipid binding	GO:0005543	0.0337377	0.419351	37	408	Ailurus_020281,Ailurus_021365,Ailurus_017073,Ailurus_001990,Ailurus_023172,Ailurus_001135,Ailurus_023167,Ailurus_001134,Ailurus_018639,Ailurus_014280,Ailurus_003172,Ailurus_025371,Ailurus_008811,Ailurus_023600,Ailurus_019569,Ailurus_006236,Ailurus_018686,Ailurus_016279,Ailurus_018693,Ailurus_007168,Ailurus_025808,Ailurus_011897,Ailurus_022308,Ailurus_000772,Ailurus_024961,Ailurus_026778,Ailurus_0…
GO:MF	organic acid binding	GO:0043177	0.033779	0.416423	20	194	Ailurus_026849,Ailurus_002615,Ailurus_022205,Ailurus_023754,Ailurus_009081,Ailurus_010284,Ailurus_027328,Ailurus_012728,Ailurus_005170,Ailurus_008234,Ailurus_019568,Ailurus_006241,Ailurus_018209,Ailurus_025825,Ailurus_008270,Ailurus_025002,Ailurus_025457,Ailurus_005462,Ailurus_025004,Ailurus_014126,
GO:MF	pentosyltransferase activity	GO:0016763	0.0344804	0.418214	7	47	Ailurus_025703,Ailurus_006250,Ailurus_020372,Ailurus_000763,Ailurus_000126,Ailurus_008707,Ailurus_018567,
GO:MF	ubiquitin-like protein ligase binding	GO:0044389	0.0370316	0.445564	36	398	Ailurus_022249,Ailurus_012892,Ailurus_006185,Ailurus_002607,Ailurus_000665,Ailurus_020005,Ailurus_000656,Ailurus_000065,Ailurus_014686,Ailurus_022285,Ailurus_021165,Ailurus_012223,Ailurus_022265,Ailurus_018612,Ailurus_004202,Ailurus_014029,Ailurus_018843,Ailurus_019104,Ailurus_014732,Ailurus_019171,Ailurus_026941,Ailurus_006074,Ailurus_012737,Ailurus_012736,Ailurus_008275,Ailurus_006081,Ailurus_0…
GO:MF	UDP-galactosyltransferase activity	GO:0035250	0.040346	0.439712	5	29	Ailurus_024686,Ailurus_006674,Ailurus_000518,Ailurus_003228,Ailurus_012194,
GO:MF	nucleoside-triphosphatase regulator activity	GO:0060589	0.04117	0.442284	52	613	Ailurus_015702,Ailurus_026849,Ailurus_019085,Ailurus_009049,Ailurus_003970,Ailurus_024891,Ailurus_022222,Ailurus_010686,Ailurus_016652,Ailurus_002698,Ailurus_011155,Ailurus_011397,Ailurus_002655,Ailurus_000236,Ailurus_000032,Ailurus_025772,Ailurus_015970,Ailurus_002677,Ailurus_005586,Ailurus_026283,Ailurus_027110,Ailurus_017310,Ailurus_021810,Ailurus_006011,Ailurus_000707,Ailurus_021263,Ailurus_0…
GO:MF	cargo receptor activity	GO:0038024	0.0416087	0.443826	9	70	Ailurus_010016,Ailurus_022684,Ailurus_023167,Ailurus_000031,Ailurus_000030,Ailurus_019568,Ailurus_000782,Ailurus_014784,Ailurus_027449,
GO:MF	enzyme inhibitor activity	GO:0004857	0.0417093	0.441766	32	350	Ailurus_012892,Ailurus_022215,Ailurus_023314,Ailurus_025978,Ailurus_000665,Ailurus_013955,Ailurus_018826,Ailurus_026283,Ailurus_003172,Ailurus_000077,Ailurus_026214,Ailurus_019107,Ailurus_000735,Ailurus_010713,Ailurus_009144,Ailurus_026932,Ailurus_009153,Ailurus_006074,Ailurus_000302,Ailurus_004537,Ailurus_012359,Ailurus_015868,Ailurus_000113,Ailurus_023016,Ailurus_009814,Ailurus_026599,Ailurus_0…
GO:MF	phosphatidylinositol-3,4,5-trisphosphate binding	GO:0005547	0.0423546	0.445464	6	39	Ailurus_023167,Ailurus_019569,Ailurus_011897,Ailurus_024575,Ailurus_025059,Ailurus_019679,
GO:MF	chromatin DNA binding	GO:0031490	0.0449603	0.469585	9	71	Ailurus_022215,Ailurus_022205,Ailurus_012558,Ailurus_012564,Ailurus_025825,Ailurus_013493,Ailurus_006334,Ailurus_012833,Ailurus_001930,
GO:MF	phosphatidylinositol binding	GO:0035091	0.0456393	0.47339	23	238	Ailurus_021365,Ailurus_017073,Ailurus_023167,Ailurus_018639,Ailurus_014280,Ailurus_008811,Ailurus_019569,Ailurus_006236,Ailurus_016279,Ailurus_018693,Ailurus_007168,Ailurus_025808,Ailurus_011897,Ailurus_000772,Ailurus_026778,Ailurus_024575,Ailurus_004742,Ailurus_025059,Ailurus_025043,Ailurus_003228,Ailurus_006391,Ailurus_019679,Ailurus_018108,
GO:MF	nuclear receptor activity	GO:0004879	0.0462052	0.475977	7	50	Ailurus_013994,Ailurus_022205,Ailurus_018828,Ailurus_024914,Ailurus_025825,Ailurus_025277,Ailurus_014126,
GO:MF	organic hydroxy compound transmembrane transporter activity	GO:1901618	0.0471397	0.4823	6	40	Ailurus_002672,Ailurus_026288,Ailurus_013895,Ailurus_009581,Ailurus_024972,Ailurus_010868,
GO:MF	G-protein alpha-subunit binding	GO:0001965	0.0471397	0.4823	6	40	Ailurus_022222,Ailurus_011397,Ailurus_002677,Ailurus_002725,Ailurus_017255,Ailurus_018566,
KEGG	CD molecules	ko04090	2.40139e-06	0.000852495	52	374	Ailurus_014819/Ailurus_014315/Ailurus_027406/Ailurus_002655/Ailurus_008756/Ailurus_022373/Ailurus_006037/Ailurus_008758/Ailurus_024105/Ailurus_014784/Ailurus_027330/Ailurus_024836/Ailurus_025108/Ailurus_002754/Ailurus_000011/Ailurus_027098/Ailurus_004620/Ailurus_027292/Ailurus_011924/Ailurus_016544/Ailurus_019123/Ailurus_021287/Ailurus_020002/Ailurus_002610/Ailurus_008395/Ailurus_013472/Ailurus_0…
KEGG	Osteoclast differentiation	ko04380	0.000521569	0.0925786	18	107	Ailurus_027406/Ailurus_022373/Ailurus_026883/Ailurus_019084/Ailurus_015895/Ailurus_026214/Ailurus_000358/Ailurus_000539/Ailurus_016805/Ailurus_023888/Ailurus_012223/Ailurus_014730/Ailurus_007268/Ailurus_027105/Ailurus_019679/Ailurus_022249/Ailurus_000340/Ailurus_008811
The GO and KEGG enrichment analysis result of down-regulated DEGs between geriatric and adult red panda.
source	term_name	term_id	p_value	adujusted_ p-value	HitsGenesCountsInSelectedSet	HitsGenesCountsInBackground	gene_id
GO:BP	chromosome segregation	GO:0007059	9.20164e-10	5.31119e-06	39	356	Ailurus_011310,Ailurus_011522,Ailurus_015771,Ailurus_001399,Ailurus_001398,Ailurus_025309,Ailurus_005342,Ailurus_003395,Ailurus_003394,Ailurus_024083,Ailurus_006695,Ailurus_005354,Ailurus_004476,Ailurus_004042,Ailurus_016019,Ailurus_021854,Ailurus_025623,Ailurus_024302,Ailurus_008064,Ailurus_024764,Ailurus_025827,Ailurus_020148,Ailurus_007184,Ailurus_012730,Ailurus_004767,Ailurus_026780,Ailurus_0…
GO:BP	nuclear chromosome segregation	GO:0098813	1.20495e-08	3.47748e-05	33	296	Ailurus_011310,Ailurus_011522,Ailurus_001399,Ailurus_001398,Ailurus_025309,Ailurus_005342,Ailurus_003395,Ailurus_003394,Ailurus_006695,Ailurus_004476,Ailurus_016019,Ailurus_021854,Ailurus_025623,Ailurus_024302,Ailurus_008064,Ailurus_024764,Ailurus_025827,Ailurus_020148,Ailurus_007184,Ailurus_012730,Ailurus_004767,Ailurus_026780,Ailurus_007819,Ailurus_023037,Ailurus_009821,Ailurus_009808,Ailurus_0…
GO:BP	nuclear division	GO:0000280	1.3417e-08	2.58143e-05	46	508	Ailurus_011310,Ailurus_026800,Ailurus_026801,Ailurus_011522,Ailurus_001399,Ailurus_001398,Ailurus_002240,Ailurus_023162,Ailurus_025309,Ailurus_005342,Ailurus_007515,Ailurus_003395,Ailurus_003394,Ailurus_024083,Ailurus_006695,Ailurus_004476,Ailurus_016428,Ailurus_016019,Ailurus_021854,Ailurus_024538,Ailurus_025623,Ailurus_024302,Ailurus_023456,Ailurus_008064,Ailurus_013843,Ailurus_025827,Ailurus_0…
GO:BP	chromosome organization	GO:0051276	1.48657e-08	2.14511e-05	82	1190	Ailurus_003979,Ailurus_020042,Ailurus_018187,Ailurus_018188,Ailurus_011310,Ailurus_000636,Ailurus_013709,Ailurus_011522,Ailurus_019262,Ailurus_016882,Ailurus_026419,Ailurus_015771,Ailurus_001399,Ailurus_001398,Ailurus_012476,Ailurus_025309,Ailurus_023366,Ailurus_001330,Ailurus_014638,Ailurus_023360,Ailurus_003520,Ailurus_005342,Ailurus_026047,Ailurus_003395,Ailurus_004001,Ailurus_003394,Ailurus_0…
GO:BP	male meiotic nuclear division	GO:0007140	3.94966e-08	4.55949e-05	13	53	Ailurus_026800,Ailurus_026801,Ailurus_007515,Ailurus_025623,Ailurus_020148,Ailurus_026321,Ailurus_004767,Ailurus_026318,Ailurus_015660,Ailurus_005448,Ailurus_008914,Ailurus_019223,Ailurus_010862,
GO:BP	cell cycle process	GO:0022402	4.49225e-08	4.32154e-05	91	1407	Ailurus_015927,Ailurus_013967,Ailurus_019271,Ailurus_011310,Ailurus_011555,Ailurus_026800,Ailurus_026801,Ailurus_013709,Ailurus_009486,Ailurus_009482,Ailurus_011522,Ailurus_007907,Ailurus_001399,Ailurus_001398,Ailurus_002240,Ailurus_023162,Ailurus_012235,Ailurus_025309,Ailurus_004609,Ailurus_023366,Ailurus_024223,Ailurus_014638,Ailurus_015733,Ailurus_003520,Ailurus_005342,Ailurus_007515,Ailurus_0…
GO:BP	meiotic cell cycle	GO:0051321	5.10494e-08	4.20938e-05	30	268	Ailurus_007046,Ailurus_026800,Ailurus_026801,Ailurus_001399,Ailurus_001398,Ailurus_024223,Ailurus_007515,Ailurus_024083,Ailurus_016428,Ailurus_016019,Ailurus_021854,Ailurus_024538,Ailurus_025623,Ailurus_023420,Ailurus_013843,Ailurus_025827,Ailurus_020148,Ailurus_012730,Ailurus_026321,Ailurus_004767,Ailurus_026318,Ailurus_026780,Ailurus_001276,Ailurus_015660,Ailurus_005448,Ailurus_009836,Ailurus_0…
GO:BP	meiotic cell cycle process	GO:1903046	8.97575e-08	6.476e-05	27	230	Ailurus_026800,Ailurus_026801,Ailurus_001399,Ailurus_001398,Ailurus_024223,Ailurus_007515,Ailurus_016428,Ailurus_016019,Ailurus_021854,Ailurus_024538,Ailurus_025623,Ailurus_013843,Ailurus_025827,Ailurus_020148,Ailurus_012730,Ailurus_026321,Ailurus_004767,Ailurus_026318,Ailurus_026780,Ailurus_001276,Ailurus_015660,Ailurus_005448,Ailurus_009836,Ailurus_008914,Ailurus_001702,Ailurus_019223,Ailurus_0…
GO:BP	meiotic nuclear division	GO:0140013	1.55319e-07	9.96109e-05	25	207	Ailurus_026800,Ailurus_026801,Ailurus_001399,Ailurus_001398,Ailurus_007515,Ailurus_016428,Ailurus_016019,Ailurus_021854,Ailurus_024538,Ailurus_025623,Ailurus_013843,Ailurus_025827,Ailurus_020148,Ailurus_012730,Ailurus_026321,Ailurus_004767,Ailurus_026318,Ailurus_026780,Ailurus_015660,Ailurus_005448,Ailurus_009836,Ailurus_008914,Ailurus_001702,Ailurus_019223,Ailurus_010862,
GO:BP	sister chromatid segregation	GO:0000819	2.12875e-07	0.000122871	26	225	Ailurus_011310,Ailurus_011522,Ailurus_025309,Ailurus_005342,Ailurus_003395,Ailurus_003394,Ailurus_006695,Ailurus_004476,Ailurus_016019,Ailurus_021854,Ailurus_025623,Ailurus_024302,Ailurus_008064,Ailurus_025827,Ailurus_020148,Ailurus_007184,Ailurus_004767,Ailurus_007819,Ailurus_023037,Ailurus_009808,Ailurus_009836,Ailurus_008914,Ailurus_001702,Ailurus_019223,Ailurus_021983,Ailurus_010862,
GO:BP	cell cycle	GO:0007049	4.46476e-07	0.000234278	103	1742	Ailurus_015927,Ailurus_013967,Ailurus_007046,Ailurus_019271,Ailurus_001974,Ailurus_011310,Ailurus_011555,Ailurus_026800,Ailurus_026801,Ailurus_013709,Ailurus_009486,Ailurus_009482,Ailurus_011522,Ailurus_007907,Ailurus_001399,Ailurus_001398,Ailurus_002240,Ailurus_023162,Ailurus_012235,Ailurus_025309,Ailurus_015992,Ailurus_004609,Ailurus_023366,Ailurus_024223,Ailurus_014638,Ailurus_015733,Ailurus_0…
GO:BP	organelle fission	GO:0048285	4.48694e-07	0.000215822	46	572	Ailurus_011310,Ailurus_026800,Ailurus_026801,Ailurus_011522,Ailurus_001399,Ailurus_001398,Ailurus_002240,Ailurus_023162,Ailurus_025309,Ailurus_005342,Ailurus_007515,Ailurus_003395,Ailurus_003394,Ailurus_024083,Ailurus_006695,Ailurus_004476,Ailurus_016428,Ailurus_016019,Ailurus_021854,Ailurus_024538,Ailurus_025623,Ailurus_024302,Ailurus_023456,Ailurus_008064,Ailurus_013843,Ailurus_025827,Ailurus_0…
GO:BP	organelle organization	GO:0006996	4.56355e-07	0.000202622	206	4183	Ailurus_024424,Ailurus_011561,Ailurus_010236,Ailurus_003979,Ailurus_014608,Ailurus_020042,Ailurus_018187,Ailurus_018188,Ailurus_000641,Ailurus_011310,Ailurus_011555,Ailurus_000638,Ailurus_000636,Ailurus_011560,Ailurus_023773,Ailurus_023774,Ailurus_026800,Ailurus_026801,Ailurus_013709,Ailurus_010670,Ailurus_011522,Ailurus_023982,Ailurus_021326,Ailurus_013712,Ailurus_019262,Ailurus_016882,Ailurus_0…
GO:BP	mitotic sister chromatid segregation	GO:0000070	6.17675e-07	0.000254658	23	193	Ailurus_011310,Ailurus_011522,Ailurus_025309,Ailurus_005342,Ailurus_003395,Ailurus_003394,Ailurus_006695,Ailurus_004476,Ailurus_016019,Ailurus_021854,Ailurus_025623,Ailurus_024302,Ailurus_008064,Ailurus_020148,Ailurus_007184,Ailurus_007819,Ailurus_023037,Ailurus_009808,Ailurus_009836,Ailurus_001702,Ailurus_019223,Ailurus_021983,Ailurus_010862,
GO:BP	DNA metabolic process	GO:0006259	8.55725e-07	0.000329283	67	996	Ailurus_003979,Ailurus_020042,Ailurus_018187,Ailurus_018188,Ailurus_019271,Ailurus_026800,Ailurus_026801,Ailurus_009486,Ailurus_011522,Ailurus_016882,Ailurus_015771,Ailurus_001399,Ailurus_001398,Ailurus_004609,Ailurus_023366,Ailurus_024213,Ailurus_014638,Ailurus_023360,Ailurus_007515,Ailurus_005567,Ailurus_004273,Ailurus_018407,Ailurus_002017,Ailurus_016428,Ailurus_019368,Ailurus_018494,Ailurus_0…
GO:BP	regulation of cellular process	GO:0050794	2.21333e-06	0.000751491	428	10301	Ailurus_015943,Ailurus_010262,Ailurus_022474,Ailurus_024429,Ailurus_024428,Ailurus_011120,Ailurus_024424,Ailurus_015927,Ailurus_024881,Ailurus_011561,Ailurus_008195,Ailurus_008191,Ailurus_010236,Ailurus_003979,Ailurus_023785,Ailurus_023786,Ailurus_014608,Ailurus_000219,Ailurus_021135,Ailurus_021133,Ailurus_020042,Ailurus_024882,Ailurus_023796,Ailurus_024400,Ailurus_024886,Ailurus_013967,Ailurus_0…
GO:BP	centromere complex assembly	GO:0034508	3.88997e-06	0.00124738	11	55	Ailurus_026419,Ailurus_005342,Ailurus_003395,Ailurus_003394,Ailurus_017778,Ailurus_024302,Ailurus_015817,Ailurus_006906,Ailurus_009821,Ailurus_011724,Ailurus_019663,
GO:BP	meiotic chromosome segregation	GO:0045132	3.92378e-06	0.001192	14	89	Ailurus_001399,Ailurus_001398,Ailurus_016019,Ailurus_021854,Ailurus_025827,Ailurus_020148,Ailurus_012730,Ailurus_004767,Ailurus_026780,Ailurus_005448,Ailurus_009836,Ailurus_008914,Ailurus_001702,Ailurus_010862,
GO:BP	chromosome organization involved in meiotic cell cycle	GO:0070192	4.07509e-06	0.00117607	12	66	Ailurus_001399,Ailurus_001398,Ailurus_016019,Ailurus_021854,Ailurus_020148,Ailurus_012730,Ailurus_004767,Ailurus_026780,Ailurus_009836,Ailurus_008914,Ailurus_001702,Ailurus_010862,
GO:BP	mitotic cell cycle process	GO:1903047	5.00557e-06	0.00137582	59	883	Ailurus_019271,Ailurus_011310,Ailurus_013709,Ailurus_009486,Ailurus_009482,Ailurus_011522,Ailurus_002240,Ailurus_023162,Ailurus_012235,Ailurus_025309,Ailurus_004609,Ailurus_023366,Ailurus_015733,Ailurus_003520,Ailurus_005342,Ailurus_003395,Ailurus_003394,Ailurus_024083,Ailurus_006695,Ailurus_016218,Ailurus_025152,Ailurus_004476,Ailurus_016428,Ailurus_007567,Ailurus_022959,Ailurus_015191,Ailurus_0…
GO:BP	mitotic cell cycle	GO:0000278	9.16854e-06	0.0023009	68	1089	Ailurus_019271,Ailurus_001974,Ailurus_011310,Ailurus_013709,Ailurus_009486,Ailurus_009482,Ailurus_011522,Ailurus_002240,Ailurus_023162,Ailurus_012235,Ailurus_025309,Ailurus_015992,Ailurus_004609,Ailurus_023366,Ailurus_015733,Ailurus_003520,Ailurus_005342,Ailurus_003395,Ailurus_003394,Ailurus_024083,Ailurus_006695,Ailurus_016218,Ailurus_005354,Ailurus_025152,Ailurus_004476,Ailurus_016428,Ailurus_0…
GO:BP	mitotic nuclear division	GO:0140014	1.11163e-05	0.00267347	30	346	Ailurus_011310,Ailurus_011522,Ailurus_002240,Ailurus_023162,Ailurus_025309,Ailurus_005342,Ailurus_003395,Ailurus_003394,Ailurus_024083,Ailurus_006695,Ailurus_004476,Ailurus_016019,Ailurus_021854,Ailurus_025623,Ailurus_024302,Ailurus_023456,Ailurus_008064,Ailurus_013843,Ailurus_020148,Ailurus_007184,Ailurus_007819,Ailurus_023037,Ailurus_009808,Ailurus_009836,Ailurus_004563,Ailurus_023738,Ailurus_0…
GO:BP	mitotic cell cycle checkpoint signaling	GO:0007093	1.32856e-05	0.00306739	22	215	Ailurus_019271,Ailurus_009486,Ailurus_009482,Ailurus_023162,Ailurus_012235,Ailurus_005342,Ailurus_003395,Ailurus_003394,Ailurus_016428,Ailurus_007567,Ailurus_015191,Ailurus_025623,Ailurus_024302,Ailurus_023420,Ailurus_025827,Ailurus_020148,Ailurus_007819,Ailurus_024324,Ailurus_009836,Ailurus_006526,Ailurus_021983,Ailurus_010862,
GO:BP	kinetochore organization	GO:0051383	1.35327e-05	0.00300427	6	16	Ailurus_003395,Ailurus_003394,Ailurus_021854,Ailurus_024302,Ailurus_011724,Ailurus_001702,
GO:BP	regulation of CD40 signaling pathway	GO:2000348	1.3812e-05	0.0029527	5	10	Ailurus_001399,Ailurus_001398,Ailurus_026321,Ailurus_026318,Ailurus_024820,
GO:BP	DNA repair	GO:0006281	2.28171e-05	0.00470359	38	507	Ailurus_003979,Ailurus_018187,Ailurus_018188,Ailurus_011522,Ailurus_001399,Ailurus_001398,Ailurus_023366,Ailurus_005567,Ailurus_004273,Ailurus_018407,Ailurus_016428,Ailurus_018494,Ailurus_007567,Ailurus_007556,Ailurus_005168,Ailurus_009520,Ailurus_021854,Ailurus_023420,Ailurus_026705,Ailurus_023675,Ailurus_022552,Ailurus_020148,Ailurus_012730,Ailurus_026321,Ailurus_026318,Ailurus_016736,Ailurus_0…
GO:BP	CD40 signaling pathway	GO:0023035	2.4561e-05	0.0048885	5	11	Ailurus_001399,Ailurus_001398,Ailurus_026321,Ailurus_026318,Ailurus_024820,
GO:BP	cell cycle checkpoint signaling	GO:0000075	2.87032e-05	0.00552249	24	259	Ailurus_019271,Ailurus_009486,Ailurus_009482,Ailurus_023162,Ailurus_012235,Ailurus_023366,Ailurus_005342,Ailurus_003395,Ailurus_003394,Ailurus_016428,Ailurus_007567,Ailurus_015191,Ailurus_025623,Ailurus_024302,Ailurus_023420,Ailurus_002995,Ailurus_025827,Ailurus_020148,Ailurus_007819,Ailurus_024324,Ailurus_009836,Ailurus_006526,Ailurus_021983,Ailurus_010862,
GO:BP	cytoskeleton organization	GO:0007010	5.09752e-05	0.00949125	81	1437	Ailurus_024424,Ailurus_011561,Ailurus_010236,Ailurus_014608,Ailurus_000641,Ailurus_011310,Ailurus_011555,Ailurus_011560,Ailurus_023773,Ailurus_023774,Ailurus_010670,Ailurus_026412,Ailurus_002240,Ailurus_017926,Ailurus_024223,Ailurus_014638,Ailurus_024202,Ailurus_001346,Ailurus_003395,Ailurus_003155,Ailurus_003394,Ailurus_006695,Ailurus_016218,Ailurus_014052,Ailurus_006871,Ailurus_025152,Ailurus_0…
GO:BP	negative regulation of cell cycle	GO:0045786	7.42756e-05	0.0133975	40	575	Ailurus_013967,Ailurus_007046,Ailurus_019271,Ailurus_009486,Ailurus_009482,Ailurus_007907,Ailurus_023162,Ailurus_012235,Ailurus_025309,Ailurus_023366,Ailurus_024223,Ailurus_005342,Ailurus_003395,Ailurus_003394,Ailurus_016428,Ailurus_011636,Ailurus_009795,Ailurus_009794,Ailurus_007567,Ailurus_015191,Ailurus_025623,Ailurus_024302,Ailurus_023420,Ailurus_002995,Ailurus_013843,Ailurus_025827,Ailurus_0…
GO:BP	regulation of histone H3-K9 methylation	GO:0051570	7.84406e-05	0.01372	6	21	Ailurus_013709,Ailurus_016882,Ailurus_012476,Ailurus_005168,Ailurus_003613,Ailurus_021774,
GO:BP	regulation of GO:BP	GO:0050789	9.81435e-05	0.0166613	436	10809	Ailurus_015943,Ailurus_010262,Ailurus_022474,Ailurus_024429,Ailurus_024428,Ailurus_011120,Ailurus_024424,Ailurus_015927,Ailurus_024881,Ailurus_011561,Ailurus_008195,Ailurus_008191,Ailurus_010236,Ailurus_003979,Ailurus_023785,Ailurus_022455,Ailurus_023786,Ailurus_014608,Ailurus_000219,Ailurus_021135,Ailurus_021133,Ailurus_020042,Ailurus_024882,Ailurus_023796,Ailurus_024400,Ailurus_024886,Ailurus_0…
[truncated: 1,606 more rows]

## Sheet: Sheet4
The GO enrichment of clusters.
[truncated: 398 more rows]

## Sheet: Sheet5
DEGs between geriatric and adults.
gene id	baseMean	log2FoldChange	lfcSE	stat	pvalue	padj	gene symbol
[truncated: 3,911 more rows]

## Sheet: Sheet6
DEGs in two comparisons.
[truncated: 1,691 more rows]

[truncated: 1 more sheets: Sheet7]
