# Supplementary material for: Blood transcriptome analysis revealing aging gene expression profiles in red panda
Source: PeerJ journal article supplement (doi:10.7717/peerj.13743), 2022-07-22
Supplement: supplementary_1.pdf [file supplementary_1.pdf]

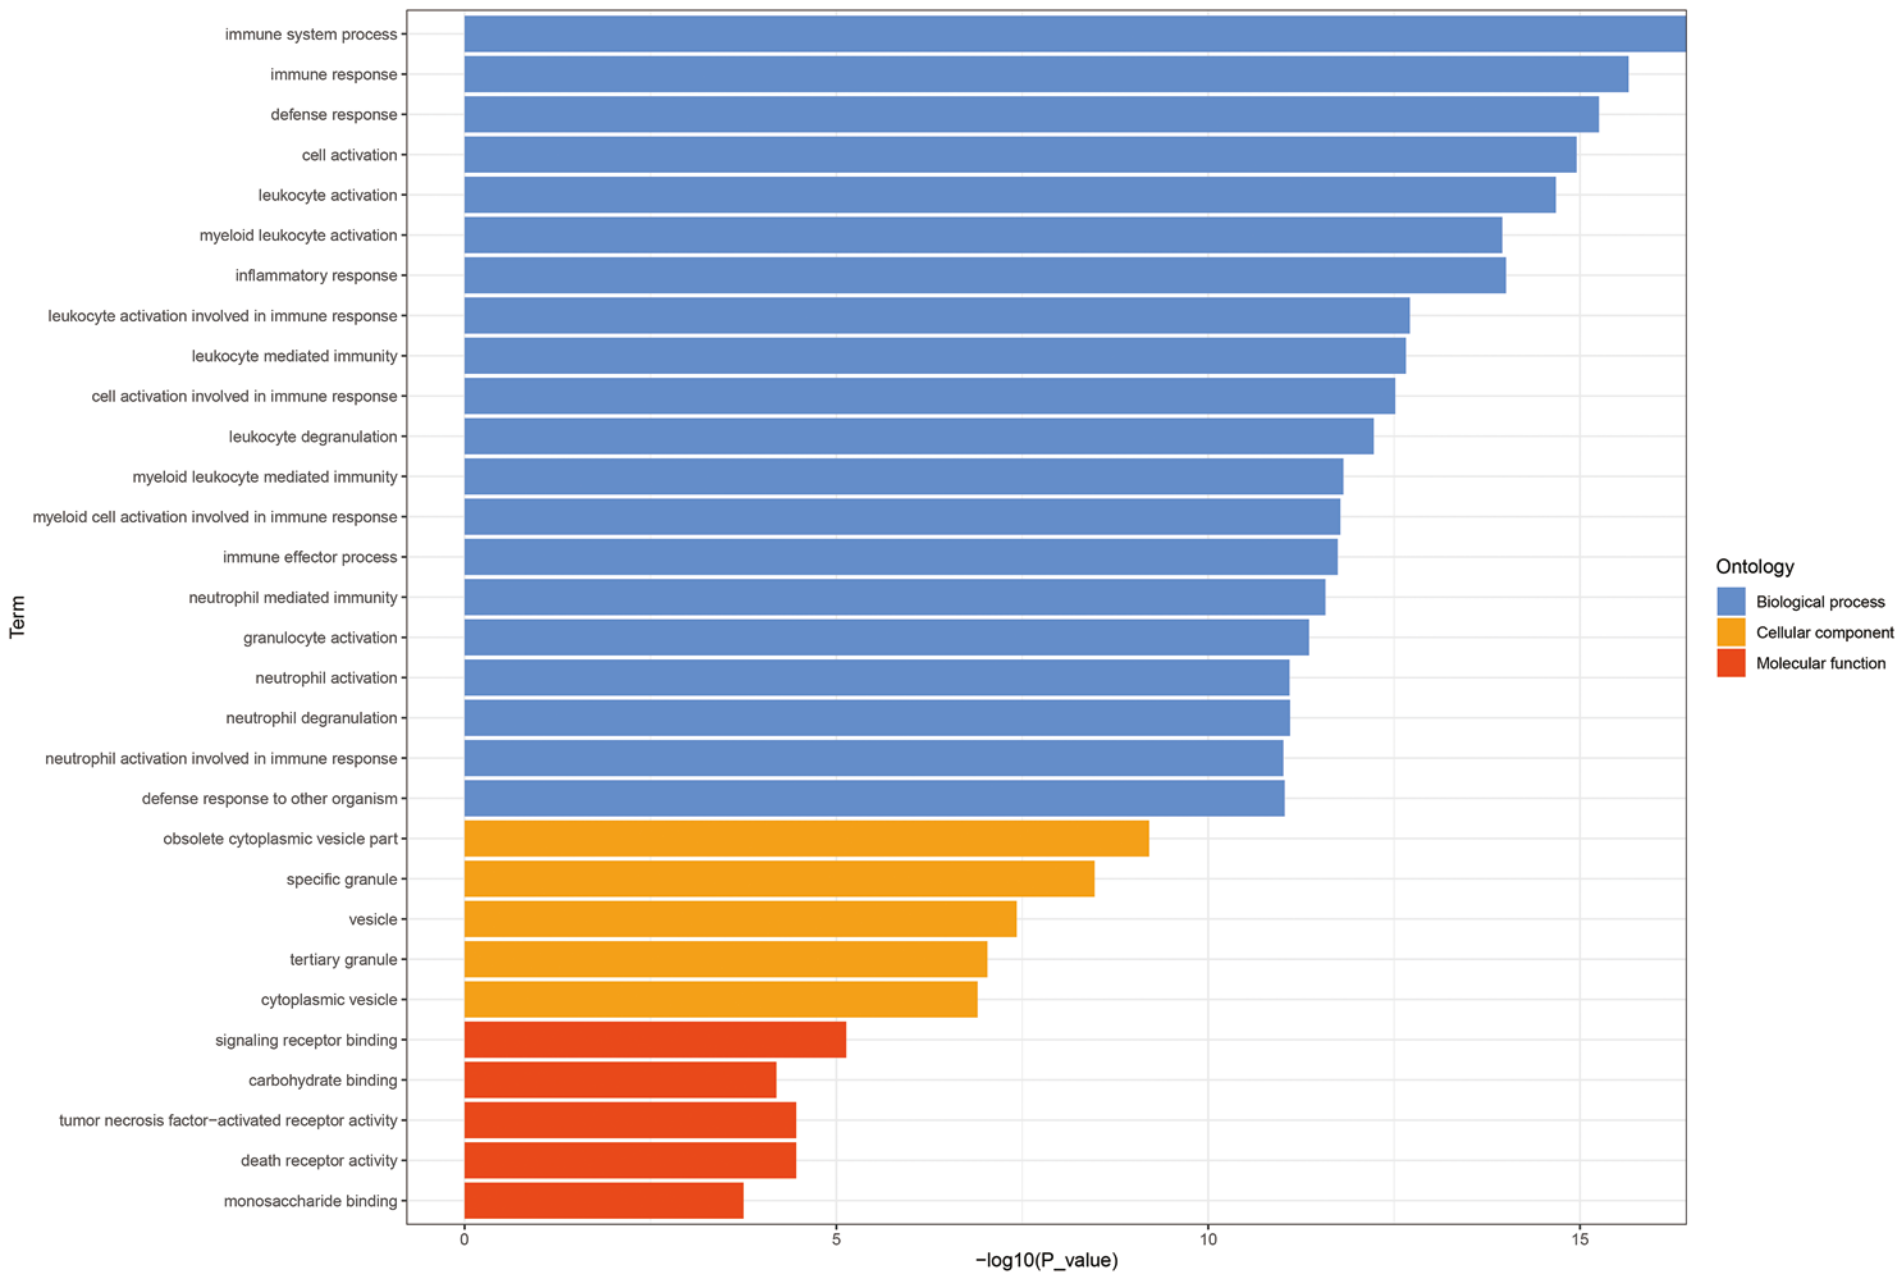

GO enrichment analysis of up-regulated DEGs between geriatric and adults.

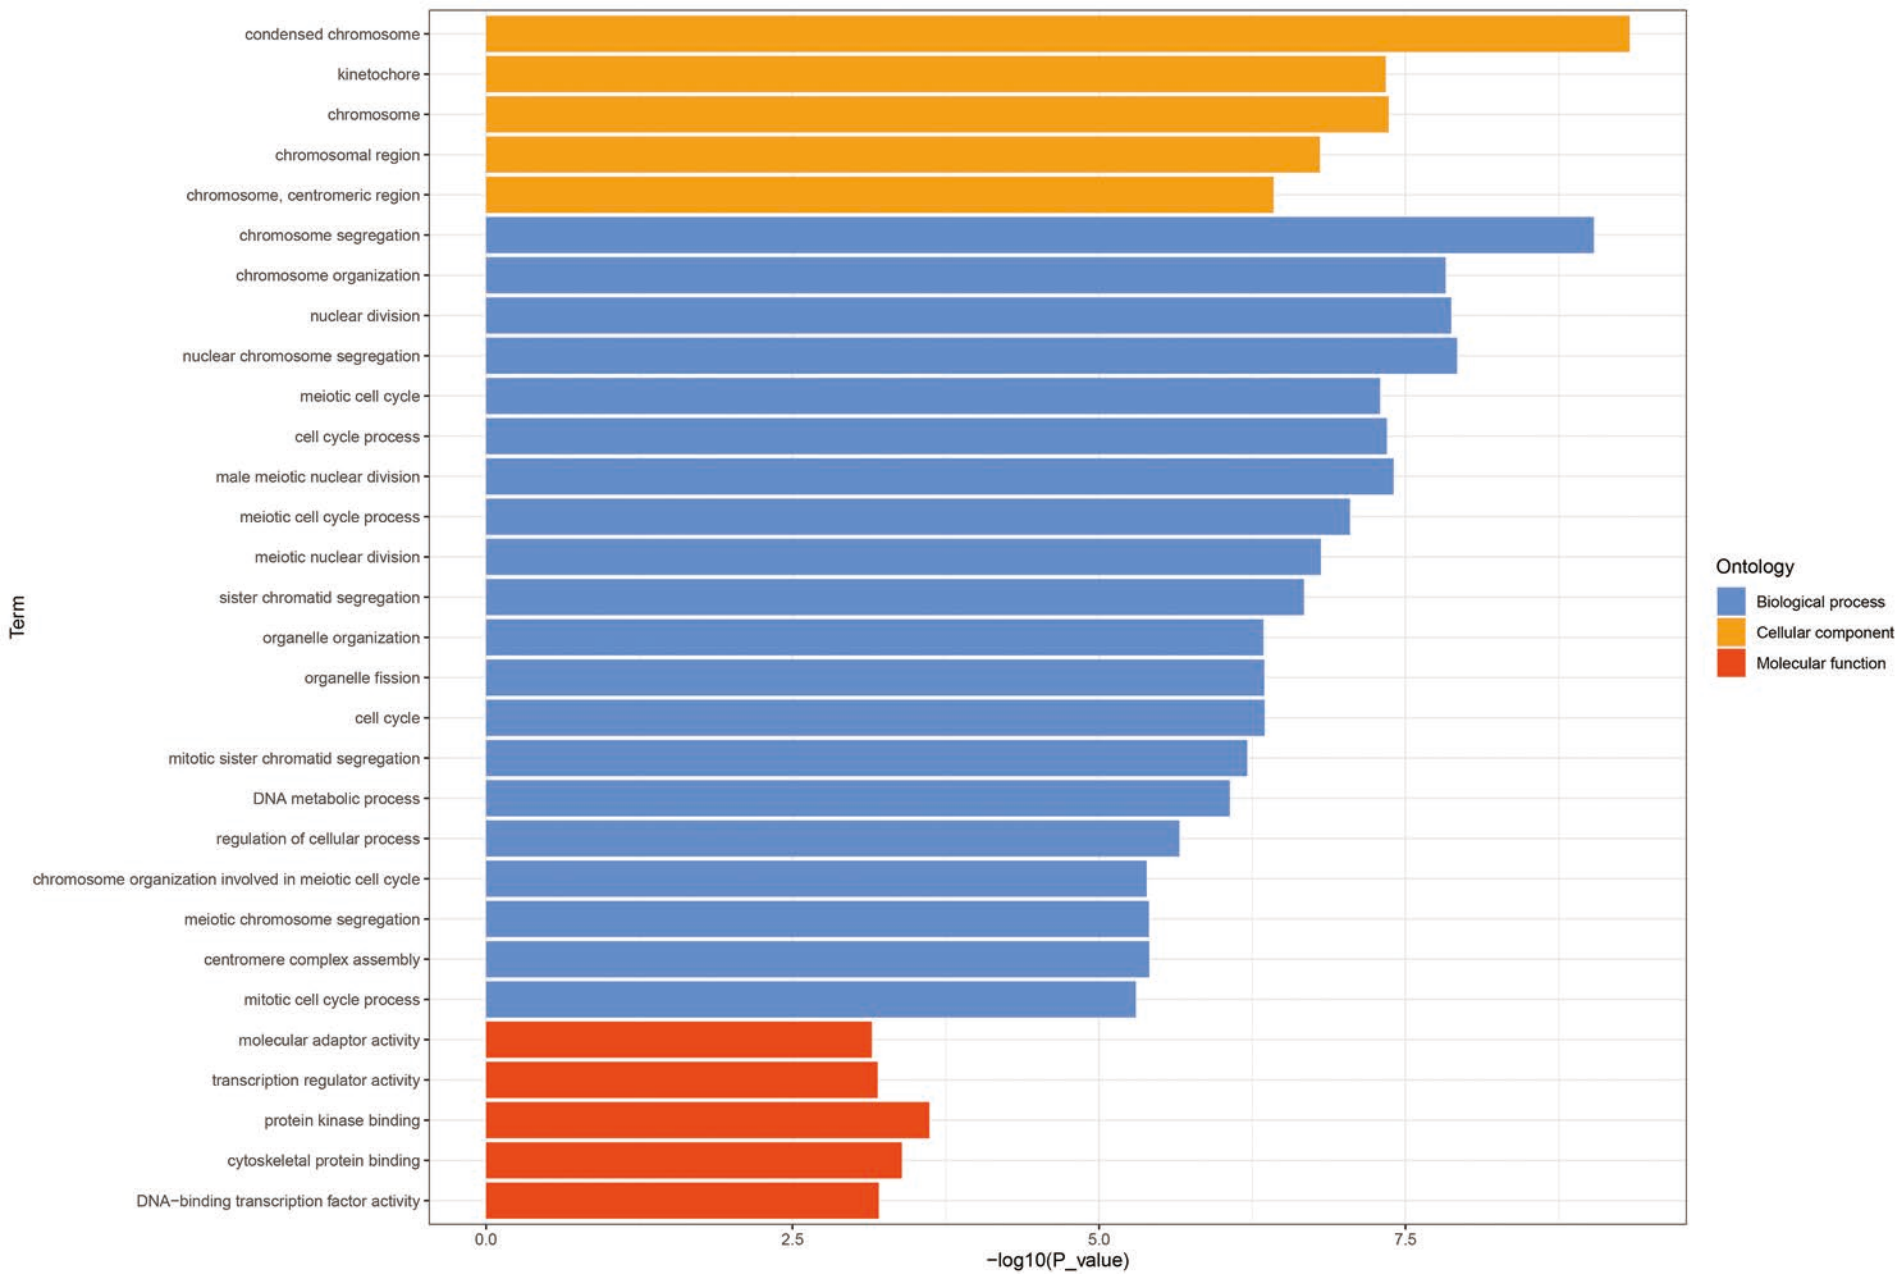

GO enrichment analysis of down-regulated DEGs between geriatric and adults.

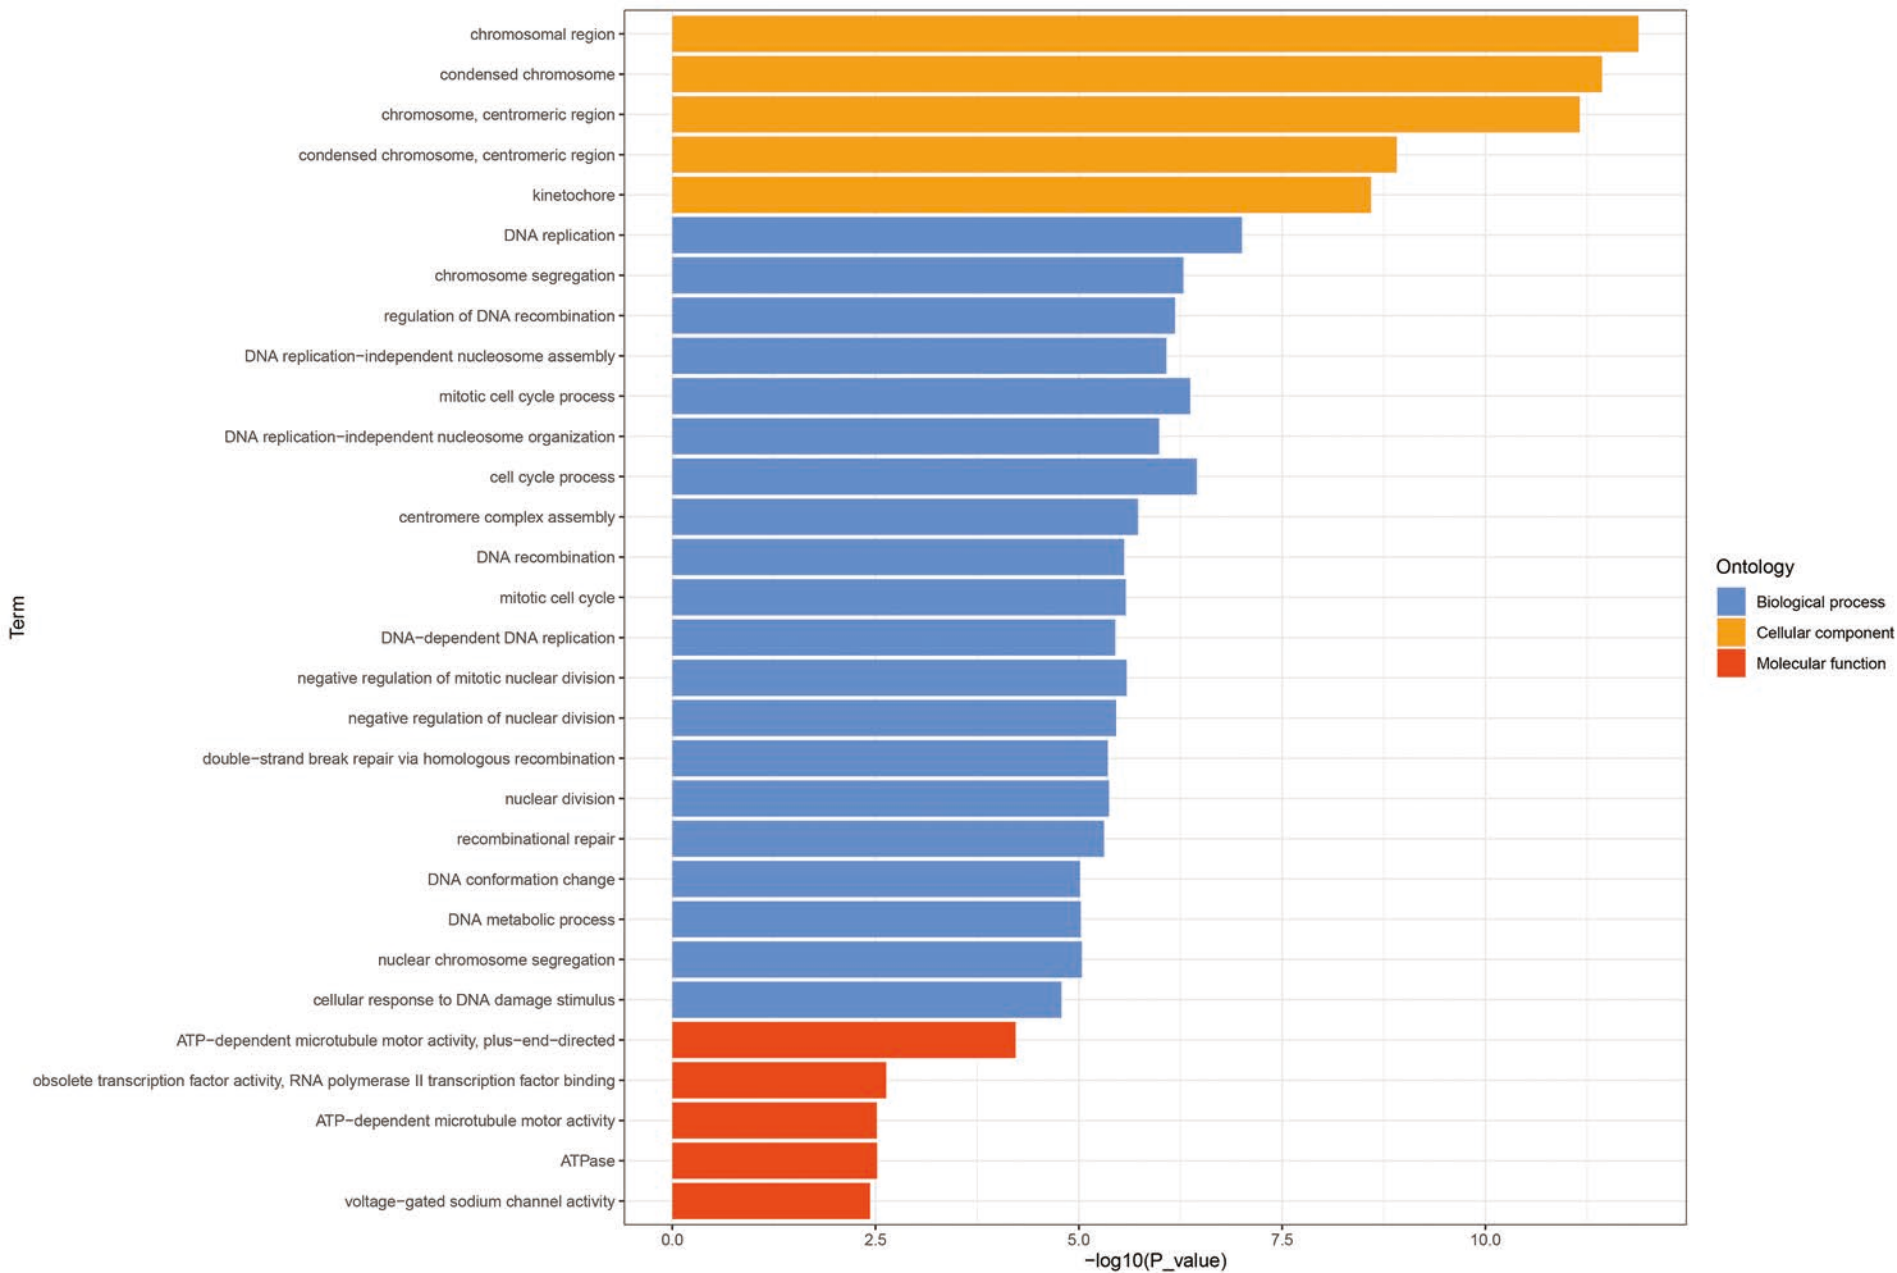

GO enrichment analysis of up-regulated DEGs between adults and juveniles.

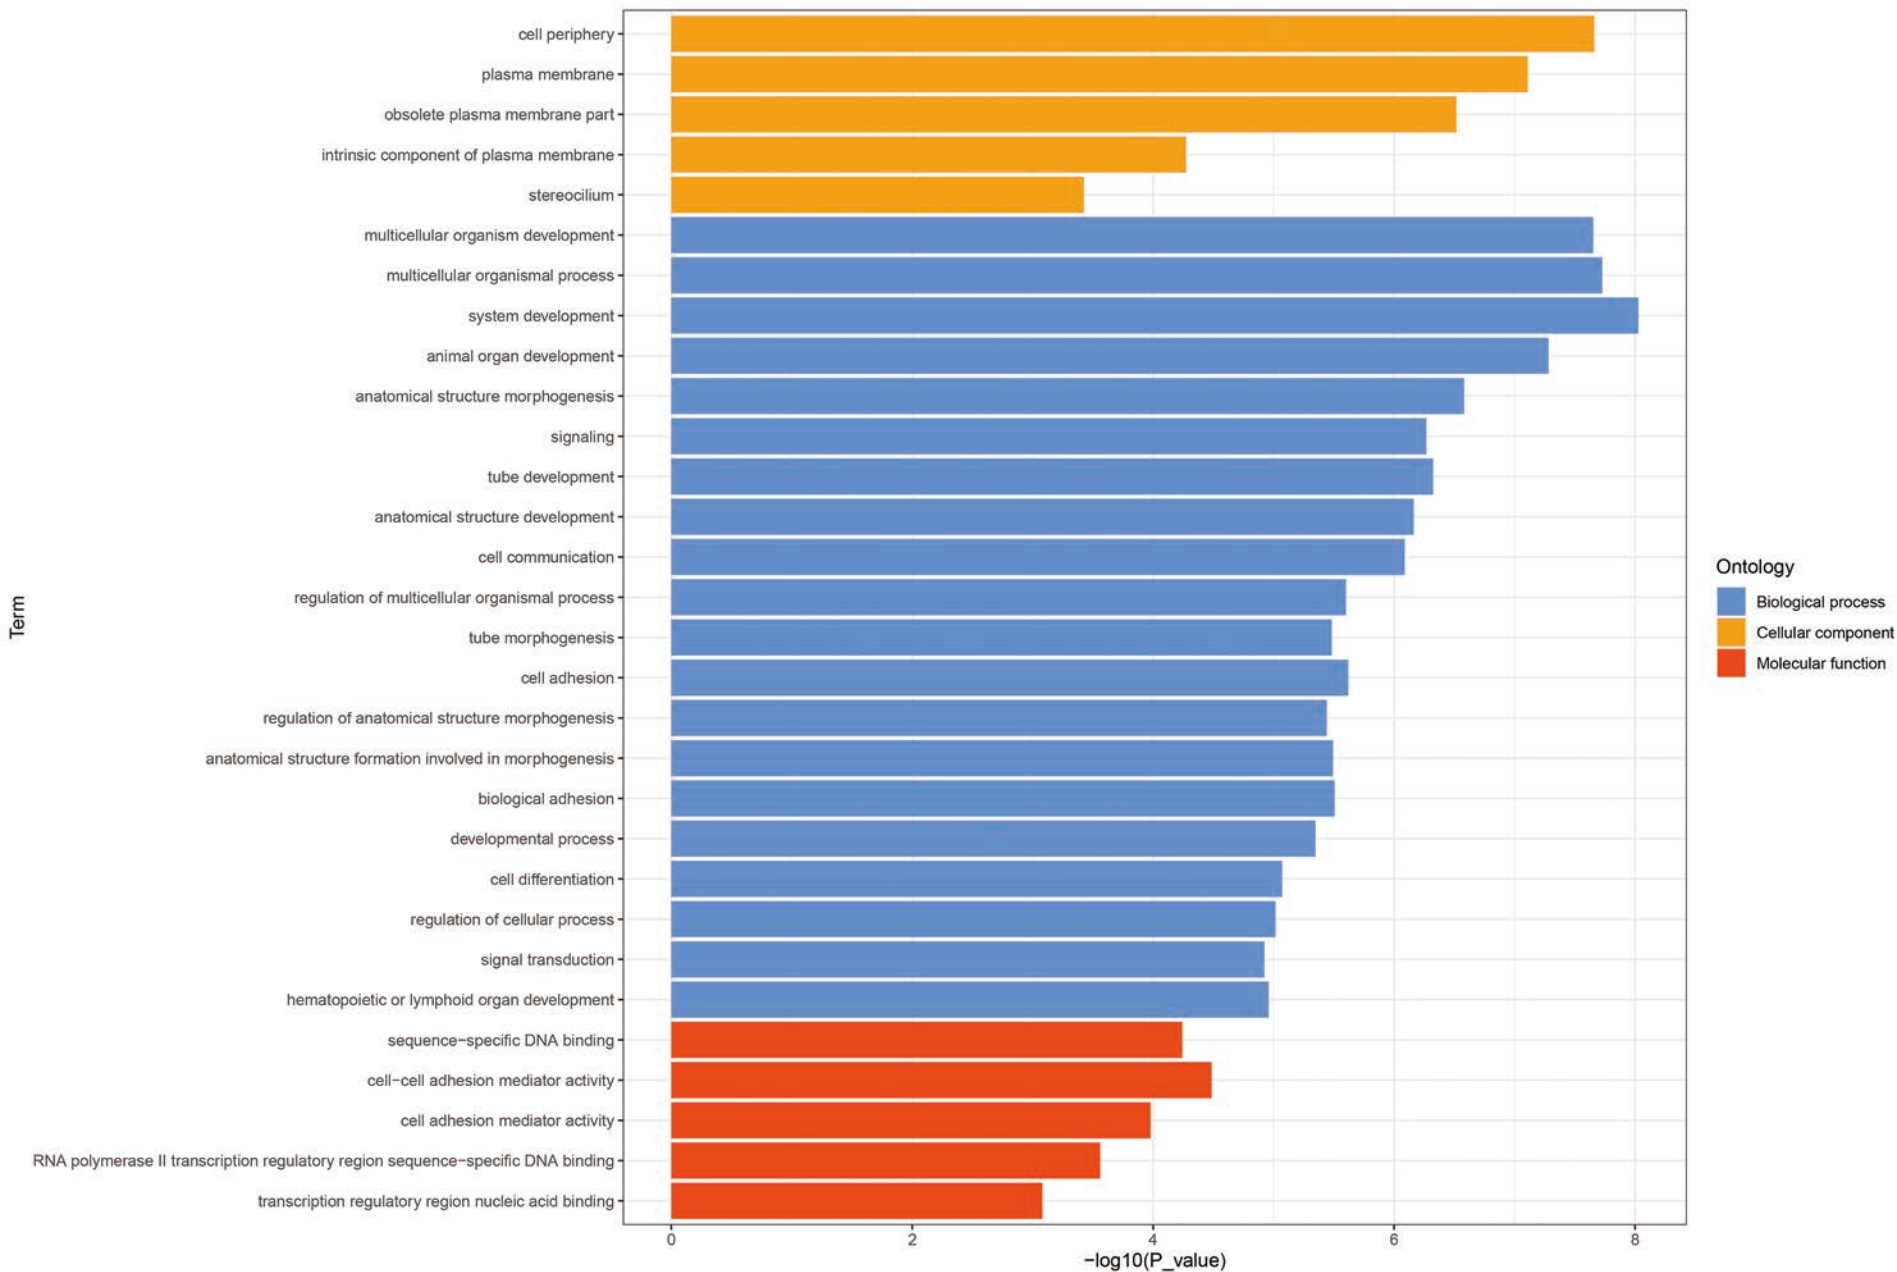

GO enrichment analysis of down-regulated DEGs between adults and juveniles.

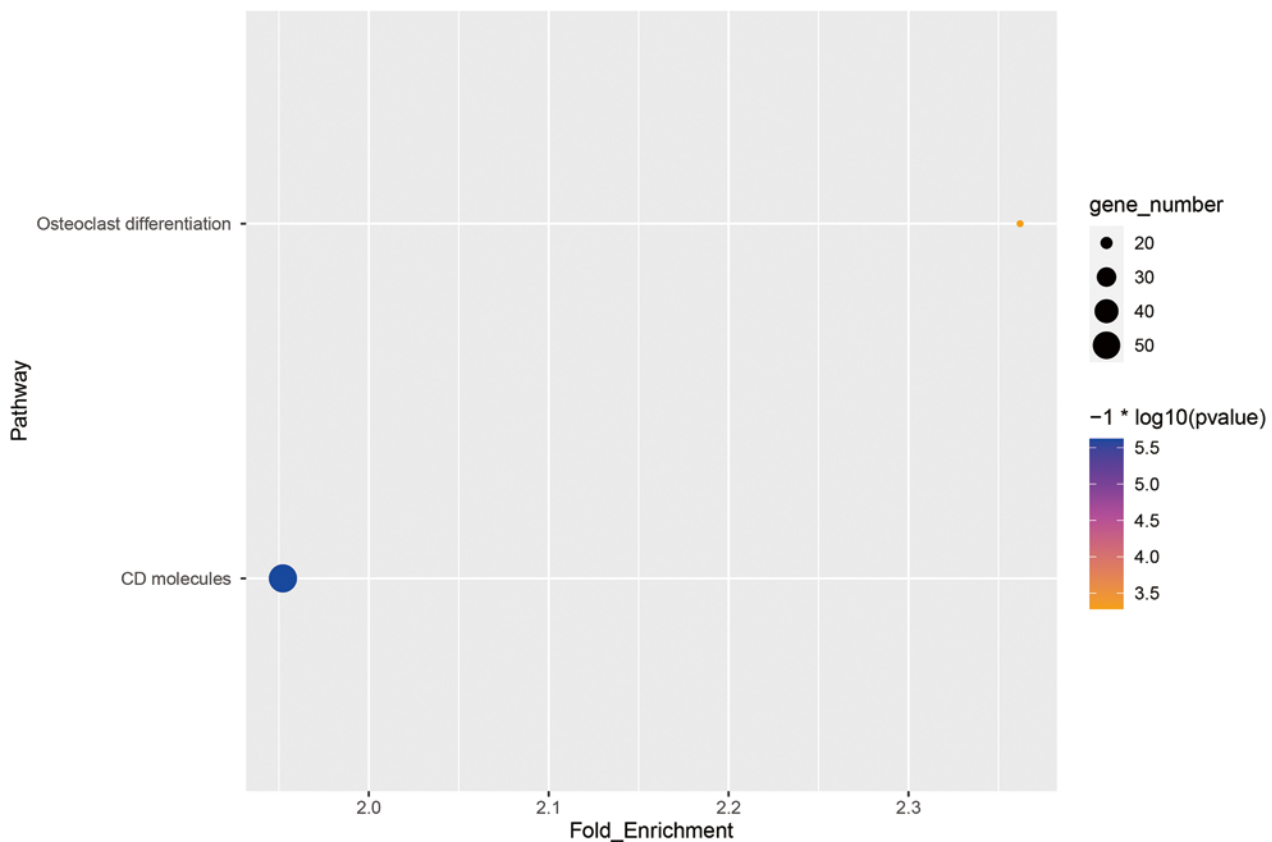

KEGG enrichment analysis of up-regulated DEGs between geriatric and adults.

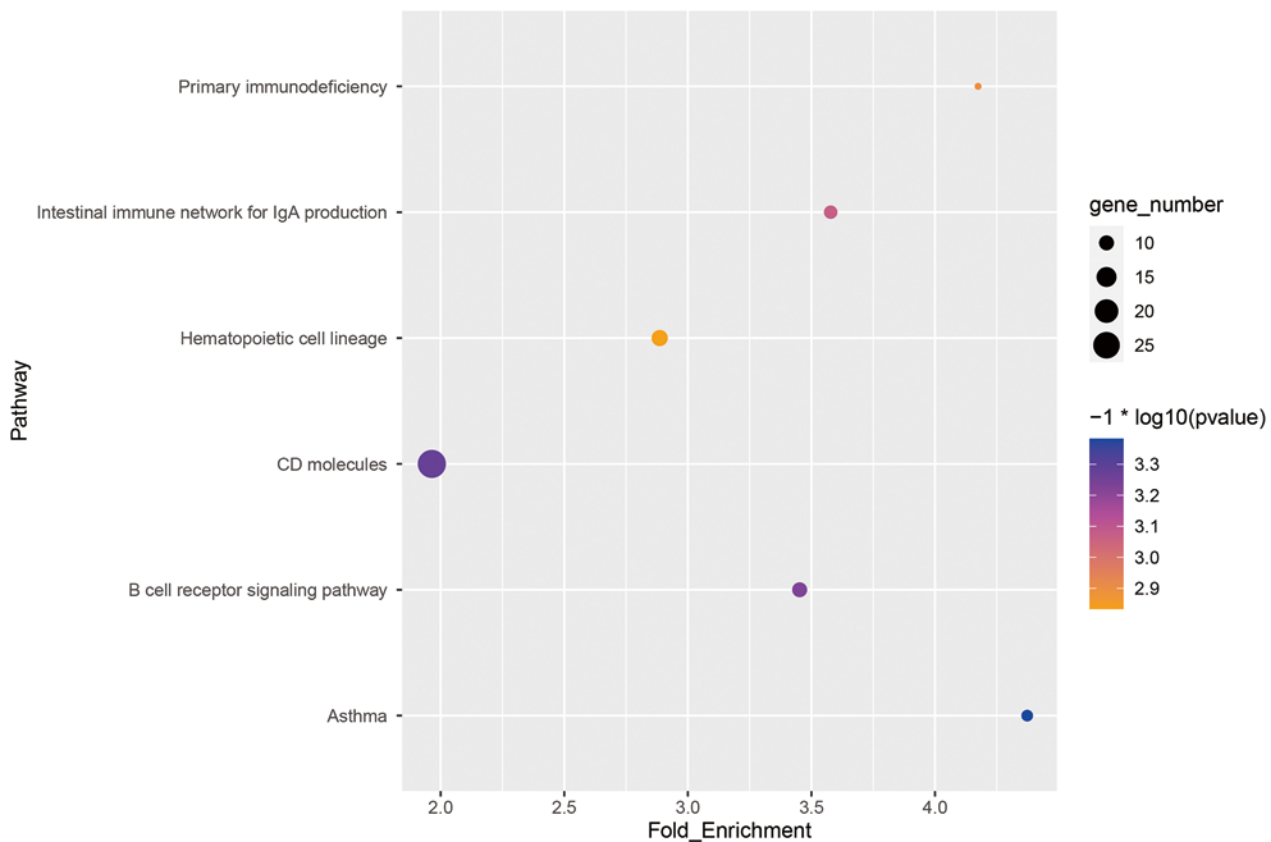

KEGG enrichment analysis of down-regulated DEGs between geriatric and adults.

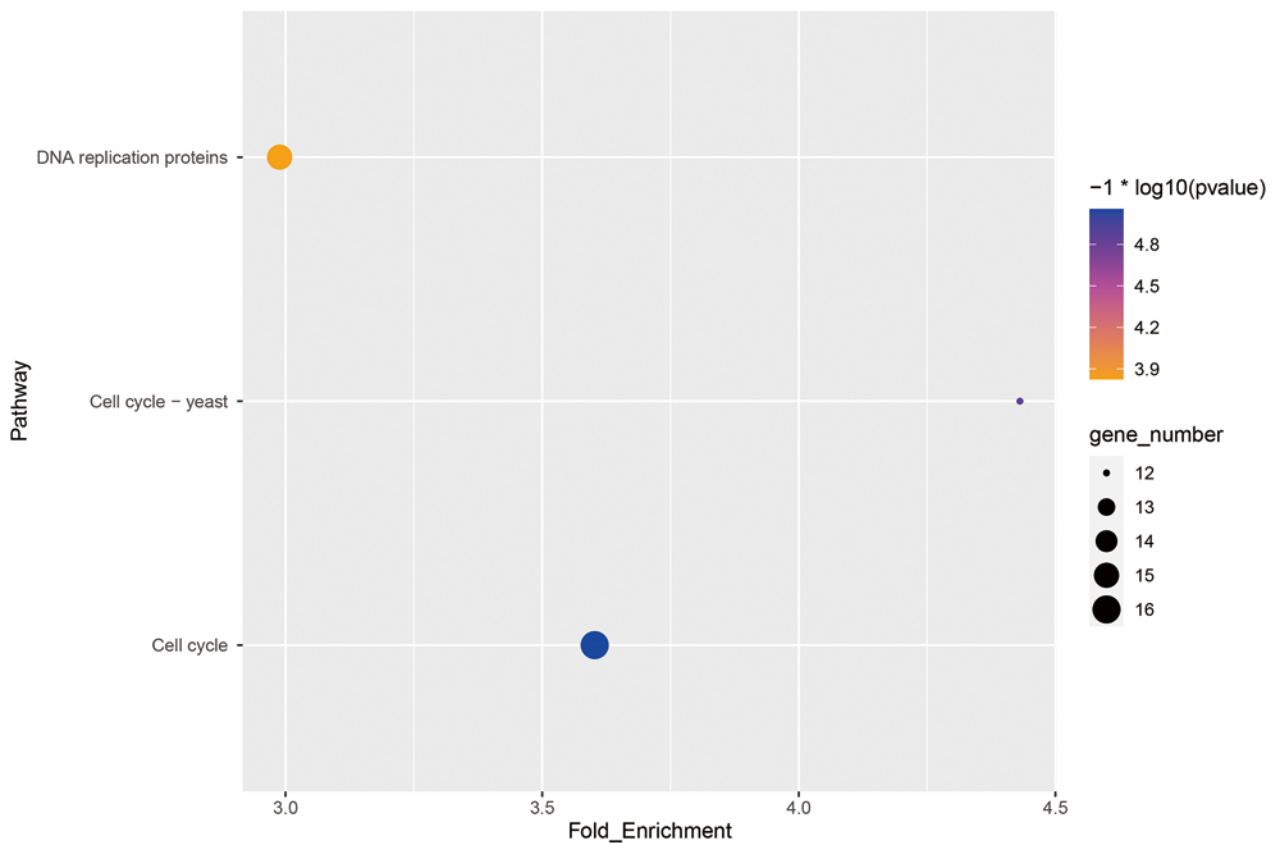

KEGG enrichment analysis of up-regulated DEGs between adults and juveniles.

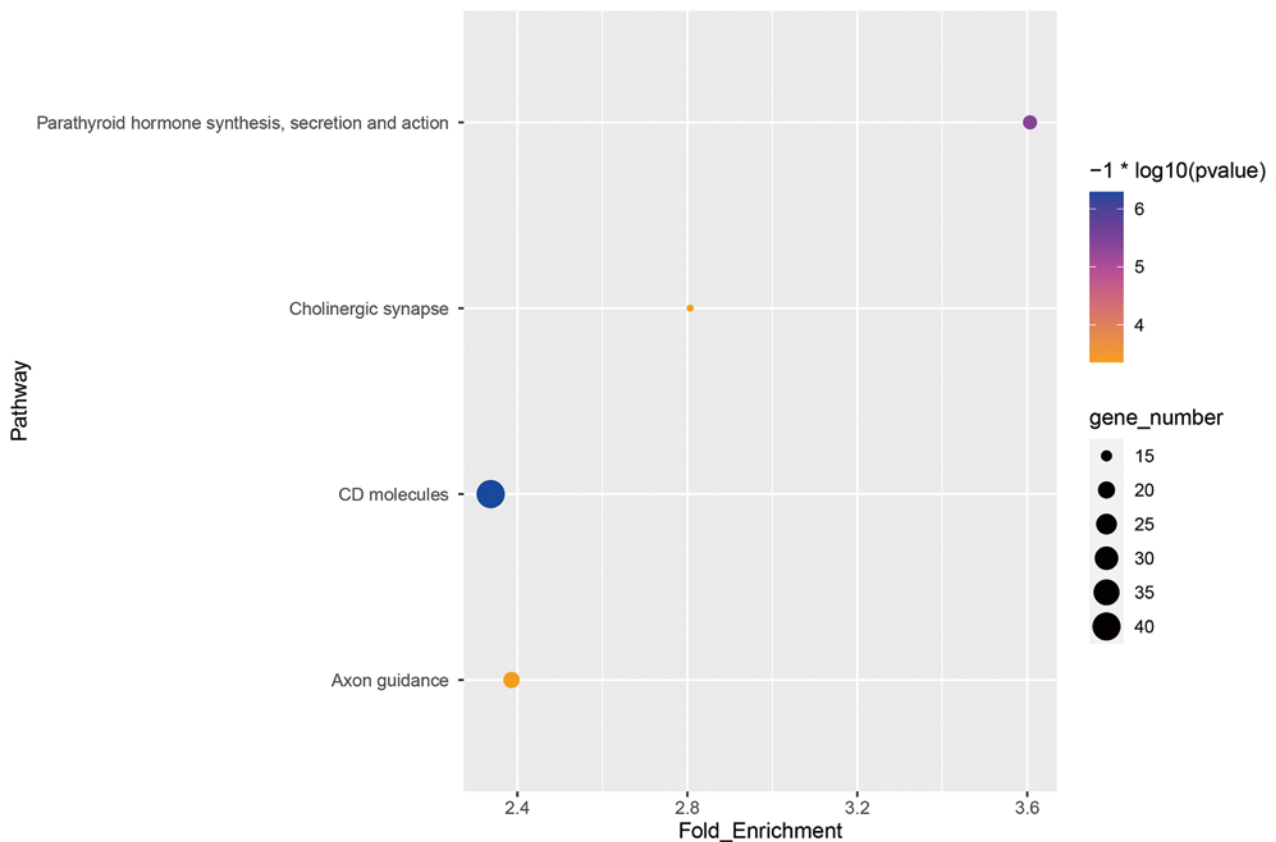

KEGG enrichment analysis of down-regulated DEGs between adults and juveniles.



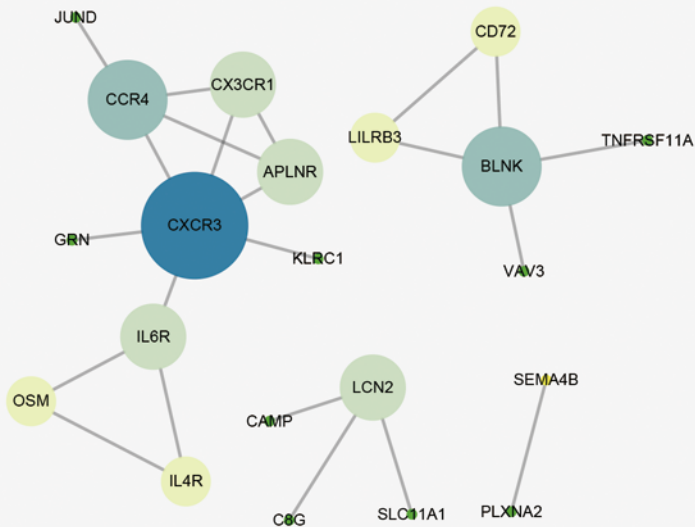

protein-protein interaction analysis of 33 immune-related DEGs that were common in the two comparisons.

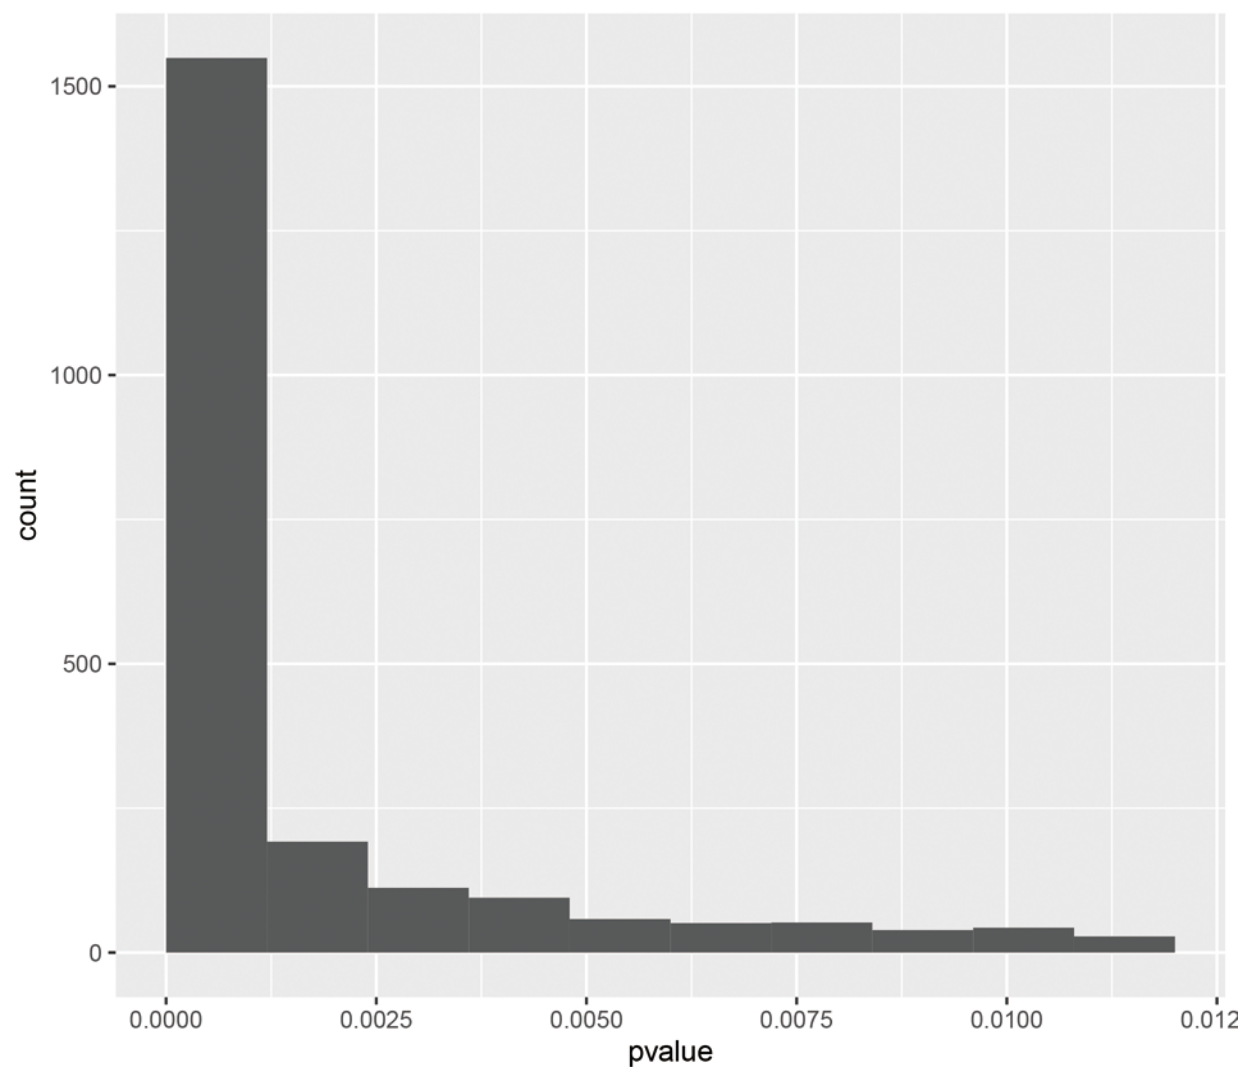

P-values frequency distribution of DEGs between geriatric and adults.

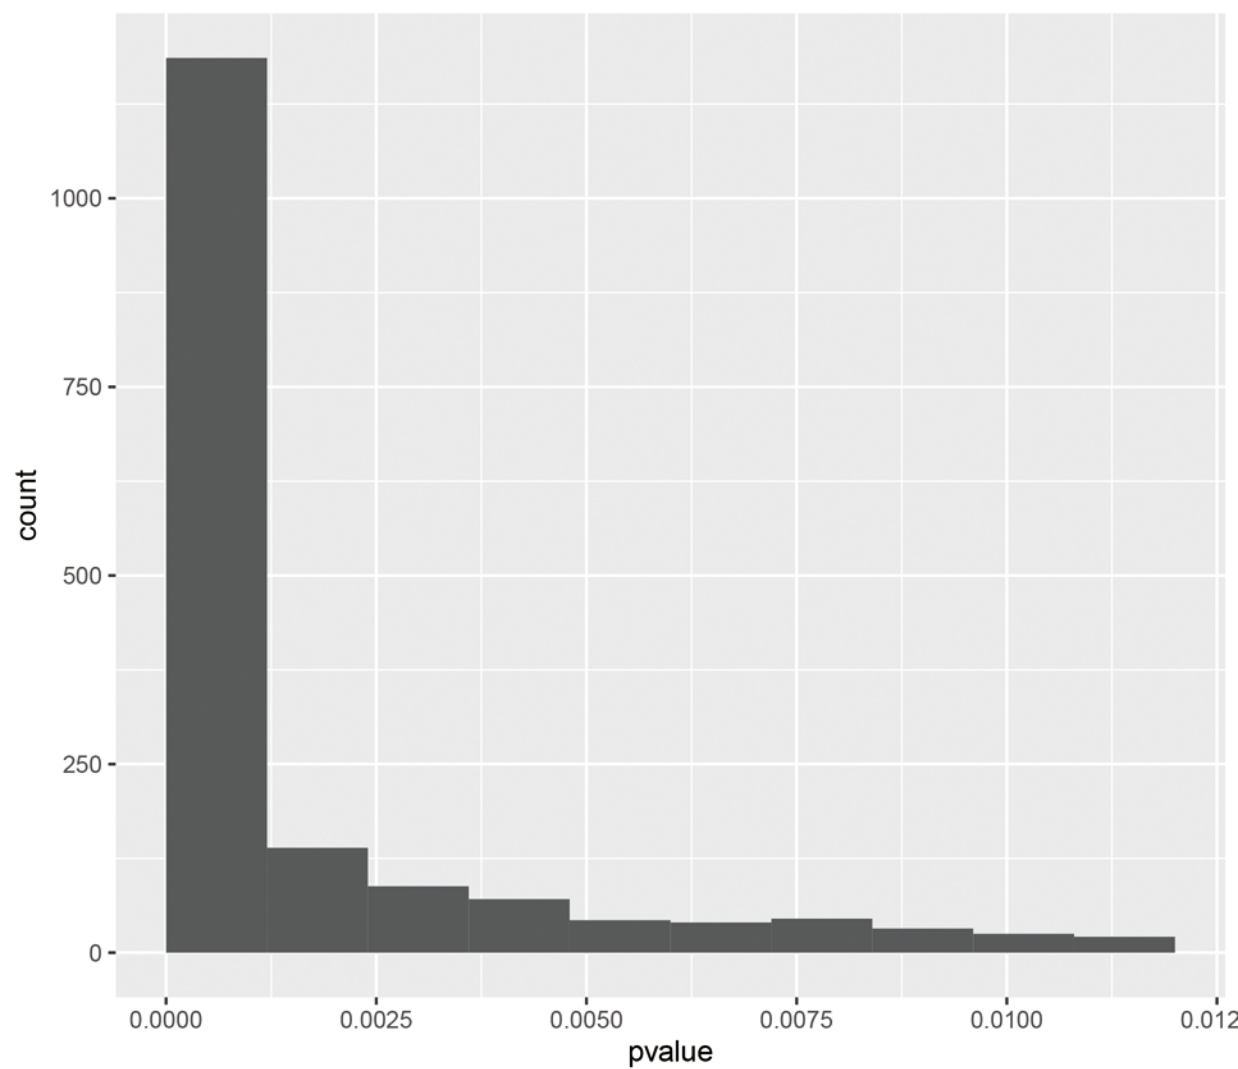

P-values frequency distribution of DEGs between adults and juveniles.
